# Supplementary material for: Controllable Fabrication of Organic Cocrystals with Interior Hollow Structure Based on Donor-Acceptor Charge Transfer Molecules
Source: MDPI journal article supplement (doi:10.3390/cryst12121781), 2022-12-08
Supplement: s1 [file s1]

Archive with 3 entries (3 files):
- checkCIF-PLATON page 2.htm
- mo_d8v211043_0m.cif
- Supporting Information.pdf
