# Supplementary material for: Controllable Fabrication of Organic Cocrystals with Interior Hollow Structure Based on Donor-Acceptor Charge Transfer Molecules
Source: MDPI journal article supplement (doi:10.3390/cryst12121781), 2022-12-08
Supplement: s1 [file s1 › mo_d8v211043_0m.cif]

 
data_mo_d8v211043_0m 
  
_audit_creation_method            SHELXL-2013 
_chemical_name_systematic 
; 
 ? 
; 
_chemical_name_common             ? 
_chemical_melting_point           ? 
_chemical_formula_moiety          ? 
_chemical_formula_sum 
 'C31 H17 N5' 
_chemical_formula_weight          459.49 
  
loop_ 
 _atom_type_symbol 
 _atom_type_description 
 _atom_type_scat_dispersion_real 
 _atom_type_scat_dispersion_imag 
 _atom_type_scat_source 
 'C'  'C'   0.0033   0.0016 
 'International Tables Vol C Tables 4.2.6.8 and 6.1.1.4' 
 'H'  'H'   0.0000   0.0000 
 'International Tables Vol C Tables 4.2.6.8 and 6.1.1.4' 
 'N'  'N'   0.0061   0.0033 
 'International Tables Vol C Tables 4.2.6.8 and 6.1.1.4' 
  
_space_group_crystal_system       triclinic 
_space_group_IT_number            2 
_space_group_name_H-M_alt         'P -1' 
_space_group_name_Hall            '-P 1' 
  
_shelx_space_group_comment 
; 
The symmetry employed for this shelxl refinement is uniquely defined 
by the following loop, which should always be used as a source of 
symmetry information in preference to the above space-group names. 
They are only intended as comments. 
; 
  
loop_ 
 _space_group_symop_operation_xyz 
 'x, y, z' 
 '-x, -y, -z' 
  
_cell_length_a                    7.4656(12) 
_cell_length_b                    9.1294(15) 
_cell_length_c                    34.520(6) 
_cell_angle_alpha                 90.960(4) 
_cell_angle_beta                  92.040(4) 
_cell_angle_gamma                 91.918(4) 
_cell_volume                      2349.6(7) 
_cell_formula_units_Z             4 
_cell_measurement_temperature     293(2) 
_cell_measurement_reflns_used     6858 
_cell_measurement_theta_min       4.724 
_cell_measurement_theta_max       53.916 
  
_exptl_crystal_description        prismatic 
_exptl_crystal_colour             red 
_exptl_crystal_density_meas       ? 
_exptl_crystal_density_method     ? 
_exptl_crystal_density_diffrn     1.299 
_exptl_crystal_F_000              952 
_exptl_transmission_factor_min    ? 
_exptl_transmission_factor_max    ? 
_exptl_crystal_size_max           0.190 
_exptl_crystal_size_mid           0.120 
_exptl_crystal_size_min           0.060 
_exptl_absorpt_coefficient_mu     0.079 
_shelx_estimated_absorpt_T_min    0.985 
_shelx_estimated_absorpt_T_max    0.995 
_exptl_absorpt_correction_type    multi-scan 
_exptl_absorpt_correction_T_min   0.6183 
_exptl_absorpt_correction_T_max   0.7456 
_exptl_absorpt_process_details    sadabs 
  
_exptl_special_details 
; 
 ? 
; 
  
_diffrn_ambient_temperature       293(2) 
_diffrn_radiation_wavelength      0.71073 
_diffrn_radiation_type            MoK\a 
_diffrn_source                    ? 
_diffrn_measurement_device_type   'Bruker APEX-II CCD' 
_diffrn_measurement_method        '\f and \w scans' 
_diffrn_detector_area_resol_mean  ? 
_diffrn_reflns_number             40360 
_diffrn_reflns_av_unetI/netI      0.0657 
_diffrn_reflns_av_R_equivalents   0.0803 
_diffrn_reflns_limit_h_min        -8 
_diffrn_reflns_limit_h_max        8 
_diffrn_reflns_limit_k_min        -10 
_diffrn_reflns_limit_k_max        10 
_diffrn_reflns_limit_l_min        -41 
_diffrn_reflns_limit_l_max        41 
_diffrn_reflns_theta_min          1.771 
_diffrn_reflns_theta_max          24.999 
_diffrn_reflns_theta_full         25.242 
_diffrn_measured_fraction_theta_max   0.996 
_diffrn_measured_fraction_theta_full  0.973 
_diffrn_reflns_Laue_measured_fraction_max    0.996 
_diffrn_reflns_Laue_measured_fraction_full   0.973 
_diffrn_reflns_point_group_measured_fraction_max   0.996 
_diffrn_reflns_point_group_measured_fraction_full  0.973 
_reflns_number_total              8237 
_reflns_number_gt                 4241 
_reflns_threshold_expression      'I > 2\s(I)' 
_reflns_Friedel_coverage          0.000 
_reflns_Friedel_fraction_max      . 
_reflns_Friedel_fraction_full     . 
  
_reflns_special_details 
; 
 Reflections were merged by SHELXL according to the crystal 
 class for the calculation of statistics and refinement. 
  
 _reflns_Friedel_fraction is defined as the number of unique 
 Friedel pairs measured divided by the number that would be 
 possible theoretically, ignoring centric projections and 
 systematic absences. 
; 
  
_computing_data_collection        'Bruker APEX2' 
_computing_cell_refinement        'Bruker SAINT' 
_computing_data_reduction         'Bruker SAINT' 
_computing_structure_solution     'SHELXS-97 (Sheldrick 2008)' 
_computing_structure_refinement   'SHELXL-2013 (Sheldrick, 2013)' 
_computing_molecular_graphics     'Bruker SHELXTL' 
_computing_publication_material   'Bruker SHELXTL' 
  
_refine_special_details 
; 
 ? 
; 
_refine_ls_structure_factor_coef  Fsqd 
_refine_ls_matrix_type            full 
_refine_ls_weighting_scheme       calc 
_refine_ls_weighting_details 
'w=1/[\s^2^(Fo^2^)+(0.0980P)^2^+1.1803P] where P=(Fo^2^+2Fc^2^)/3' 
_atom_sites_solution_primary      ? 
_atom_sites_solution_secondary    ? 
_atom_sites_solution_hydrogens    geom 
_refine_ls_hydrogen_treatment     constr 
_refine_ls_extinction_method      SHELXL 
_refine_ls_extinction_coef        0.014(2) 
_refine_ls_extinction_expression 
 'Fc^*^=kFc[1+0.001xFc^2^\l^3^/sin(2\q)]^-1/4^' 
_refine_ls_number_reflns          8237 
_refine_ls_number_parameters      650 
_refine_ls_number_restraints      0 
_refine_ls_R_factor_all           0.1539 
_refine_ls_R_factor_gt            0.0763 
_refine_ls_wR_factor_ref          0.2379 
_refine_ls_wR_factor_gt           0.1812 
_refine_ls_goodness_of_fit_ref    1.035 
_refine_ls_restrained_S_all       1.035 
_refine_ls_shift/su_max           0.003 
_refine_ls_shift/su_mean          0.000 
  
loop_ 
 _atom_site_label 
 _atom_site_type_symbol 
 _atom_site_fract_x 
 _atom_site_fract_y 
 _atom_site_fract_z 
 _atom_site_U_iso_or_equiv 
 _atom_site_adp_type 
 _atom_site_occupancy 
 _atom_site_site_symmetry_order 
 _atom_site_calc_flag 
 _atom_site_refinement_flags_posn 
 _atom_site_refinement_flags_adp 
 _atom_site_refinement_flags_occupancy 
 _atom_site_disorder_assembly 
 _atom_site_disorder_group 
N1 N 0.0887(5) 0.3817(4) 0.78671(10) 0.0768(10) Uani 1 1 d . . . . . 
N2 N 0.6075(4) 0.6194(4) 0.71340(9) 0.0681(9) Uani 1 1 d . . . . . 
N3 N -0.1643(6) -0.3084(4) 0.86693(11) 0.0932(12) Uani 1 1 d . . . . . 
N4 N -0.1188(6) -0.0166(4) 0.78443(11) 0.0932(12) Uani 1 1 d . . . . . 
N5 N 0.1998(6) 0.5000(4) 0.91916(11) 0.0971(13) Uani 1 1 d . . . . . 
N6 N 0.1728(6) 0.1945(4) 1.00221(11) 0.0928(12) Uani 1 1 d . . . . . 
N7 N 0.6669(5) 0.8053(4) 0.49636(11) 0.0854(11) Uani 1 1 d . . . . . 
N8 N 0.6896(5) 0.4951(4) 0.57782(11) 0.0866(11) Uani 1 1 d . . . . . 
N9 N 0.4119(6) 1.0001(4) 0.71209(11) 0.0942(13) Uani 1 1 d . . . . . 
N10 N 0.3855(5) 1.2960(4) 0.63155(11) 0.0872(12) Uani 1 1 d . . . . . 
C1 C -0.0035(5) 0.9371(4) 0.63325(11) 0.0556(9) Uani 1 1 d . . . . . 
C2 C -0.0541(5) 1.0026(5) 0.66865(13) 0.0752(12) Uani 1 1 d . . . . . 
H2 H -0.0556 0.9474 0.6910 0.090 Uiso 1 1 calc R U . . . 
C3 C -0.1005(6) 1.1461(5) 0.67008(16) 0.0871(14) Uani 1 1 d . . . . . 
H3 H -0.1324 1.1873 0.6936 0.104 Uiso 1 1 calc R U . . . 
C4 C -0.1012(6) 1.2314(5) 0.6371(2) 0.0964(16) Uani 1 1 d . . . . . 
H4 H -0.1356 1.3282 0.6387 0.116 Uiso 1 1 calc R U . . . 
C5 C -0.0528(6) 1.1759(4) 0.60310(16) 0.0816(13) Uani 1 1 d . . . . . 
H5 H -0.0536 1.2346 0.5813 0.098 Uiso 1 1 calc R U . . . 
C6 C 0.0002(5) 1.0273(4) 0.59984(12) 0.0602(10) Uani 1 1 d . . . . . 
C7 C 0.0541(5) 0.9703(4) 0.56523(12) 0.0669(11) Uani 1 1 d . . . . . 
H7 H 0.0585 1.0307 0.5438 0.080 Uiso 1 1 calc R U . . . 
C8 C 0.1024(5) 0.8253(4) 0.56116(10) 0.0560(9) Uani 1 1 d . . . . . 
C9 C 0.1573(6) 0.7685(5) 0.52503(12) 0.0796(13) Uani 1 1 d . . . . . 
H9 H 0.1630 0.8298 0.5038 0.095 Uiso 1 1 calc R U . . . 
C10 C 0.2016(6) 0.6264(6) 0.52100(13) 0.0890(14) Uani 1 1 d . . . . . 
H10 H 0.2378 0.5910 0.4972 0.107 Uiso 1 1 calc R U . . . 
C11 C 0.1928(6) 0.5332(5) 0.55253(13) 0.0788(13) Uani 1 1 d . . . . . 
H11 H 0.2217 0.4355 0.5495 0.095 Uiso 1 1 calc R U . . . 
C12 C 0.1431(5) 0.5829(4) 0.58745(11) 0.0646(11) Uani 1 1 d . . . . . 
H12 H 0.1383 0.5182 0.6080 0.078 Uiso 1 1 calc R U . . . 
C13 C 0.0977(4) 0.7313(4) 0.59379(10) 0.0498(9) Uani 1 1 d . . . . . 
C14 C 0.0463(5) 0.7881(4) 0.62991(10) 0.0525(9) Uani 1 1 d . . . . . 
C15 C 0.0374(5) 0.6996(4) 0.66515(11) 0.0664(11) Uani 1 1 d . . . . . 
H15 H -0.0677 0.7100 0.6785 0.080 Uiso 1 1 calc R U . . . 
C16 C 0.1440(6) 0.6134(5) 0.68056(13) 0.0886(14) Uani 1 1 d . . . . . 
H16 H 0.2465 0.5938 0.6671 0.106 Uiso 1 1 calc R U . . . 
C17 C 0.1232(5) 0.5387(5) 0.71837(12) 0.0660(11) Uani 1 1 d . . . . . 
C18 C 0.1730(6) 0.3969(5) 0.72143(12) 0.0716(11) Uani 1 1 d . . . . . 
H18 H 0.2216 0.3496 0.7004 0.086 Uiso 1 1 calc R U . . . 
C19 C 0.1521(6) 0.3247(5) 0.75503(13) 0.0765(12) Uani 1 1 d . . . . . 
H19 H 0.1851 0.2274 0.7557 0.092 Uiso 1 1 calc R U . . . 
C20 C 0.0414(6) 0.5216(6) 0.78404(12) 0.0799(13) Uani 1 1 d . . . . . 
H20 H -0.0037 0.5670 0.8058 0.096 Uiso 1 1 calc R U . . . 
C21 C 0.0562(6) 0.6024(5) 0.75035(14) 0.0756(12) Uani 1 1 d . . . . . 
H21 H 0.0205 0.6990 0.7498 0.091 Uiso 1 1 calc R U . . . 
C22 C 0.5925(5) 0.2527(4) 0.90714(11) 0.0587(10) Uani 1 1 d . . . . . 
C23 C 0.6576(6) 0.3978(5) 0.91688(13) 0.0787(12) Uani 1 1 d . . . . . 
H23 H 0.6611 0.4677 0.8976 0.094 Uiso 1 1 calc R U . . . 
C24 C 0.7144(7) 0.4366(6) 0.95342(16) 0.0967(15) Uani 1 1 d . . . . . 
H24 H 0.7557 0.5322 0.9588 0.116 Uiso 1 1 calc R U . . . 
C25 C 0.7115(7) 0.3337(7) 0.98328(14) 0.1024(17) Uani 1 1 d . . . . . 
H25 H 0.7493 0.3613 1.0084 0.123 Uiso 1 1 calc R U . . . 
C26 C 0.6537(7) 0.1949(6) 0.97529(13) 0.0909(14) Uani 1 1 d . . . . . 
H26 H 0.6545 0.1272 0.9951 0.109 Uiso 1 1 calc R U . . . 
C27 C 0.5917(5) 0.1481(4) 0.93757(11) 0.0635(10) Uani 1 1 d . . . . . 
C28 C 0.5316(5) 0.0052(4) 0.92931(12) 0.0702(11) Uani 1 1 d . . . . . 
H28 H 0.5340 -0.0628 0.9491 0.084 Uiso 1 1 calc R U . . . 
C29 C 0.4685(5) -0.0398(4) 0.89290(11) 0.0595(10) Uani 1 1 d . . . . . 
C30 C 0.4010(6) -0.1857(4) 0.88586(15) 0.0766(12) Uani 1 1 d . . . . . 
H30 H 0.4033 -0.2528 0.9058 0.092 Uiso 1 1 calc R U . . . 
C31 C 0.3334(6) -0.2276(5) 0.85039(16) 0.0820(13) Uani 1 1 d . . . . . 
H31 H 0.2886 -0.3231 0.8462 0.098 Uiso 1 1 calc R U . . . 
C32 C 0.3306(6) -0.1278(5) 0.81985(14) 0.0769(12) Uani 1 1 d . . . . . 
H32 H 0.2839 -0.1576 0.7955 0.092 Uiso 1 1 calc R U . . . 
C33 C 0.3954(5) 0.0111(4) 0.82553(12) 0.0658(10) Uani 1 1 d . . . . . 
H33 H 0.3926 0.0749 0.8048 0.079 Uiso 1 1 calc R U . . . 
C34 C 0.4676(5) 0.0631(4) 0.86205(10) 0.0540(9) Uani 1 1 d . . . . . 
C35 C 0.5320(5) 0.2092(4) 0.86931(10) 0.0543(9) Uani 1 1 d . . . . . 
C36 C 0.5351(5) 0.3209(4) 0.83878(11) 0.0635(10) Uani 1 1 d . . . . . 
H36 H 0.4856 0.4102 0.8448 0.076 Uiso 1 1 calc R U . . . 
C37 C 0.5994(5) 0.3074(4) 0.80460(12) 0.0663(11) Uani 1 1 d . . . . . 
H37 H 0.6489 0.2180 0.7987 0.080 Uiso 1 1 calc R U . . . 
C38 C 0.6027(5) 0.4193(4) 0.77388(11) 0.0565(9) Uani 1 1 d . . . . . 
C39 C 0.6276(6) 0.3755(4) 0.73648(12) 0.0686(11) Uani 1 1 d . . . . . 
H39 H 0.6446 0.2773 0.7305 0.082 Uiso 1 1 calc R U . . . 
C40 C 0.6273(6) 0.4780(5) 0.70765(12) 0.0723(11) Uani 1 1 d . . . . . 
H40 H 0.6420 0.4450 0.6824 0.087 Uiso 1 1 calc R U . . . 
C41 C 0.5853(5) 0.6612(4) 0.75000(12) 0.0692(11) Uani 1 1 d . . . . . 
H41 H 0.5709 0.7604 0.7551 0.083 Uiso 1 1 calc R U . . . 
C42 C 0.5820(5) 0.5668(4) 0.78091(11) 0.0637(10) Uani 1 1 d . . . . . 
H42 H 0.5662 0.6021 0.8059 0.076 Uiso 1 1 calc R U . . . 
C43 C 0.0086(5) -0.0088(4) 0.92214(11) 0.0617(10) Uani 1 1 d . . . . . 
H43 H 0.0006 -0.0782 0.9415 0.074 Uiso 1 1 calc R U . . . 
C44 C -0.0437(5) -0.0466(4) 0.88430(11) 0.0567(9) Uani 1 1 d . . . . . 
C45 C -0.0313(5) 0.0583(4) 0.85527(10) 0.0544(9) Uani 1 1 d . . . . . 
C46 C 0.0318(5) 0.1991(4) 0.86430(10) 0.0579(9) Uani 1 1 d . . . . . 
H46 H 0.0396 0.2685 0.8450 0.069 Uiso 1 1 calc R U . . . 
C47 C 0.0837(5) 0.2369(4) 0.90230(10) 0.0536(9) Uani 1 1 d . . . . . 
C48 C 0.0727(5) 0.1322(4) 0.93122(10) 0.0554(9) Uani 1 1 d . . . . . 
C49 C -0.1115(6) -0.1924(5) 0.87480(12) 0.0691(11) Uani 1 1 d . . . . . 
C50 C -0.0814(6) 0.0164(4) 0.81570(13) 0.0679(11) Uani 1 1 d . . . . . 
C51 C 0.1482(6) 0.3833(5) 0.91189(11) 0.0672(11) Uani 1 1 d . . . . . 
C52 C 0.1299(6) 0.1683(4) 0.97067(13) 0.0678(11) Uani 1 1 d . . . . . 
C53 C 0.5291(5) 1.0019(4) 0.57652(11) 0.0612(10) Uani 1 1 d . . . . . 
H53 H 0.5243 1.0731 0.5576 0.073 Uiso 1 1 calc R U . . . 
C54 C 0.5820(5) 0.8623(4) 0.56700(10) 0.0542(9) Uani 1 1 d . . . . . 
C55 C 0.5912(5) 0.7557(4) 0.59551(10) 0.0511(9) Uani 1 1 d . . . . . 
C56 C 0.5480(5) 0.7895(4) 0.63299(10) 0.0561(9) Uani 1 1 d . . . . . 
H56 H 0.5557 0.7189 0.6520 0.067 Uiso 1 1 calc R U . . . 
C57 C 0.4927(5) 0.9298(4) 0.64239(10) 0.0555(9) Uani 1 1 d . . . . . 
C58 C 0.4833(5) 1.0360(4) 0.61378(10) 0.0551(9) Uani 1 1 d . . . . . 
C59 C 0.6296(5) 0.8293(4) 0.52784(12) 0.0632(10) Uani 1 1 d . . . . . 
C60 C 0.6459(5) 0.6097(5) 0.58567(11) 0.0628(10) Uani 1 1 d . . . . . 
C61 C 0.4484(6) 0.9669(4) 0.68150(13) 0.0692(11) Uani 1 1 d . . . . . 
C62 C 0.4289(6) 1.1817(5) 0.62360(12) 0.0681(11) Uani 1 1 d . . . . . 
  
loop_ 
 _atom_site_aniso_label 
 _atom_site_aniso_U_11 
 _atom_site_aniso_U_22 
 _atom_site_aniso_U_33 
 _atom_site_aniso_U_23 
 _atom_site_aniso_U_13 
 _atom_site_aniso_U_12 
N1 0.073(3) 0.099(3) 0.059(2) 0.024(2) -0.0006(18) 0.000(2) 
N2 0.074(2) 0.073(2) 0.059(2) 0.0149(17) 0.0072(16) 0.0078(17) 
N3 0.110(3) 0.067(2) 0.101(3) -0.005(2) 0.011(2) -0.017(2) 
N4 0.108(3) 0.098(3) 0.072(3) -0.014(2) -0.016(2) 0.009(2) 
N5 0.121(4) 0.069(3) 0.099(3) 0.011(2) -0.004(2) -0.023(2) 
N6 0.123(4) 0.096(3) 0.058(2) 0.011(2) -0.004(2) -0.010(2) 
N7 0.106(3) 0.092(3) 0.060(2) 0.015(2) 0.011(2) 0.015(2) 
N8 0.095(3) 0.070(3) 0.097(3) 0.010(2) 0.011(2) 0.019(2) 
N9 0.119(4) 0.097(3) 0.068(3) -0.003(2) 0.015(2) 0.018(2) 
N10 0.102(3) 0.073(3) 0.087(3) -0.001(2) 0.002(2) 0.022(2) 
C1 0.047(2) 0.052(2) 0.068(2) -0.0017(19) -0.0041(17) 0.0016(16) 
C2 0.065(3) 0.077(3) 0.083(3) -0.010(2) 0.000(2) 0.012(2) 
C3 0.073(3) 0.078(3) 0.110(4) -0.035(3) 0.003(3) 0.013(2) 
C4 0.068(3) 0.063(3) 0.158(5) -0.009(4) -0.002(3) 0.010(2) 
C5 0.068(3) 0.053(3) 0.125(4) 0.013(3) -0.004(3) 0.007(2) 
C6 0.046(2) 0.052(2) 0.082(3) 0.012(2) -0.0066(19) 0.0027(17) 
C7 0.062(3) 0.070(3) 0.069(3) 0.031(2) -0.003(2) 0.001(2) 
C8 0.052(2) 0.066(2) 0.050(2) 0.0096(18) -0.0019(16) 0.0035(18) 
C9 0.081(3) 0.101(4) 0.056(3) 0.015(2) 0.001(2) 0.005(3) 
C10 0.085(4) 0.115(4) 0.067(3) -0.018(3) 0.008(2) 0.010(3) 
C11 0.086(3) 0.073(3) 0.077(3) -0.014(2) 0.001(2) 0.017(2) 
C12 0.078(3) 0.050(2) 0.065(3) -0.0027(19) -0.003(2) 0.0076(19) 
C13 0.044(2) 0.050(2) 0.055(2) 0.0043(17) 0.0005(16) 0.0017(15) 
C14 0.049(2) 0.054(2) 0.055(2) 0.0105(17) -0.0013(16) 0.0018(16) 
C15 0.059(3) 0.073(3) 0.068(3) 0.018(2) 0.001(2) -0.001(2) 
C16 0.064(3) 0.109(4) 0.092(3) 0.037(3) -0.004(2) -0.011(3) 
C17 0.053(3) 0.082(3) 0.063(3) 0.025(2) -0.0059(19) -0.009(2) 
C18 0.073(3) 0.076(3) 0.066(3) 0.004(2) 0.004(2) -0.003(2) 
C19 0.078(3) 0.071(3) 0.083(3) 0.024(2) 0.007(2) 0.009(2) 
C20 0.066(3) 0.108(4) 0.065(3) -0.016(3) 0.006(2) -0.005(3) 
C21 0.068(3) 0.062(3) 0.096(4) 0.009(2) 0.001(2) -0.003(2) 
C22 0.054(2) 0.060(2) 0.063(2) 0.0100(19) 0.0036(18) -0.0047(18) 
C23 0.081(3) 0.073(3) 0.082(3) 0.000(2) 0.000(2) -0.011(2) 
C24 0.100(4) 0.088(3) 0.099(4) -0.021(3) -0.003(3) -0.016(3) 
C25 0.108(4) 0.131(5) 0.066(3) -0.020(3) -0.007(3) -0.008(4) 
C26 0.089(4) 0.118(4) 0.065(3) 0.007(3) 0.003(2) -0.007(3) 
C27 0.057(3) 0.077(3) 0.057(2) 0.007(2) 0.0060(18) -0.001(2) 
C28 0.069(3) 0.069(3) 0.073(3) 0.028(2) 0.008(2) -0.004(2) 
C29 0.053(2) 0.059(2) 0.067(3) 0.011(2) 0.0061(19) 0.0029(18) 
C30 0.067(3) 0.050(3) 0.113(4) 0.012(2) 0.015(3) -0.003(2) 
C31 0.069(3) 0.056(3) 0.121(4) -0.011(3) 0.016(3) -0.002(2) 
C32 0.064(3) 0.072(3) 0.094(3) -0.018(3) 0.005(2) -0.006(2) 
C33 0.056(3) 0.070(3) 0.072(3) -0.001(2) 0.000(2) -0.001(2) 
C34 0.046(2) 0.054(2) 0.063(2) 0.0081(18) 0.0066(17) 0.0041(16) 
C35 0.051(2) 0.053(2) 0.059(2) 0.0105(18) 0.0025(17) 0.0016(17) 
C36 0.066(3) 0.060(2) 0.065(3) 0.0089(19) 0.002(2) 0.0040(19) 
C37 0.066(3) 0.063(3) 0.072(3) 0.011(2) 0.008(2) 0.0112(19) 
C38 0.051(2) 0.058(2) 0.062(2) 0.0134(19) 0.0039(17) 0.0052(17) 
C39 0.079(3) 0.058(2) 0.069(3) -0.001(2) 0.010(2) 0.002(2) 
C40 0.078(3) 0.084(3) 0.056(3) 0.002(2) 0.011(2) 0.001(2) 
C41 0.079(3) 0.065(3) 0.064(3) 0.006(2) 0.004(2) 0.013(2) 
C42 0.076(3) 0.068(3) 0.047(2) 0.0094(19) 0.0056(18) 0.011(2) 
C43 0.076(3) 0.053(2) 0.057(2) 0.0116(18) 0.0146(19) -0.0028(19) 
C44 0.056(2) 0.051(2) 0.064(2) 0.0031(19) 0.0106(18) -0.0009(17) 
C45 0.052(2) 0.058(2) 0.053(2) 0.0007(18) 0.0036(17) 0.0038(17) 
C46 0.059(2) 0.058(2) 0.056(2) 0.0139(18) 0.0037(18) 0.0014(18) 
C47 0.058(2) 0.049(2) 0.053(2) 0.0074(17) 0.0056(17) -0.0052(16) 
C48 0.064(3) 0.052(2) 0.051(2) 0.0087(17) 0.0027(17) 0.0006(17) 
C49 0.070(3) 0.062(3) 0.076(3) 0.003(2) 0.010(2) 0.001(2) 
C50 0.070(3) 0.067(3) 0.067(3) 0.000(2) -0.001(2) 0.011(2) 
C51 0.080(3) 0.057(3) 0.064(3) 0.013(2) 0.001(2) -0.010(2) 
C52 0.080(3) 0.060(3) 0.064(3) 0.016(2) 0.010(2) -0.005(2) 
C53 0.062(3) 0.065(3) 0.057(2) 0.0143(19) -0.0051(18) 0.0062(19) 
C54 0.052(2) 0.062(2) 0.049(2) 0.0088(18) 0.0012(16) 0.0072(17) 
C55 0.049(2) 0.054(2) 0.050(2) 0.0070(17) 0.0011(16) 0.0048(16) 
C56 0.055(2) 0.059(2) 0.055(2) 0.0123(17) -0.0003(17) 0.0039(17) 
C57 0.051(2) 0.066(2) 0.049(2) 0.0024(18) 0.0015(16) 0.0014(18) 
C58 0.052(2) 0.056(2) 0.058(2) 0.0060(18) -0.0020(17) 0.0083(17) 
C59 0.069(3) 0.066(3) 0.056(3) 0.012(2) -0.001(2) 0.0086(19) 
C60 0.062(3) 0.065(3) 0.063(3) 0.013(2) 0.0044(19) 0.011(2) 
C61 0.076(3) 0.069(3) 0.063(3) 0.001(2) 0.004(2) 0.008(2) 
C62 0.064(3) 0.069(3) 0.072(3) 0.005(2) -0.004(2) 0.010(2) 
  
_geom_special_details 
; 
 All esds (except the esd in the dihedral angle between two l.s. planes) 
 are estimated using the full covariance matrix.  The cell esds are taken 
 into account individually in the estimation of esds in distances, angles 
 and torsion angles; correlations between esds in cell parameters are only 
 used when they are defined by crystal symmetry.  An approximate (isotropic) 
 treatment of cell esds is used for estimating esds involving l.s. planes. 
; 
  
loop_ 
 _geom_bond_atom_site_label_1 
 _geom_bond_atom_site_label_2 
 _geom_bond_distance 
 _geom_bond_site_symmetry_2 
 _geom_bond_publ_flag 
N1 C19 1.313(5) . ? 
N1 C20 1.340(5) . ? 
N2 C40 1.317(5) . ? 
N2 C41 1.332(5) . ? 
N3 C49 1.143(5) . ? 
N4 C50 1.138(5) . ? 
N5 C51 1.141(5) . ? 
N6 C52 1.143(5) . ? 
N7 C59 1.151(4) . ? 
N8 C60 1.138(4) . ? 
N9 C61 1.139(5) . ? 
N10 C62 1.136(5) . ? 
C1 C2 1.420(5) . ? 
C1 C14 1.427(5) . ? 
C1 C6 1.429(5) . ? 
C2 C3 1.367(6) . ? 
C2 H2 0.9300 . ? 
C3 C4 1.389(7) . ? 
C3 H3 0.9300 . ? 
C4 C5 1.338(6) . ? 
C4 H4 0.9300 . ? 
C5 C6 1.429(5) . ? 
C5 H5 0.9300 . ? 
C6 C7 1.374(5) . ? 
C7 C8 1.389(5) . ? 
C7 H7 0.9300 . ? 
C8 C9 1.422(5) . ? 
C8 C13 1.428(5) . ? 
C9 C10 1.355(6) . ? 
C9 H9 0.9300 . ? 
C10 C11 1.395(6) . ? 
C10 H10 0.9300 . ? 
C11 C12 1.349(5) . ? 
C11 H11 0.9300 . ? 
C12 C13 1.424(5) . ? 
C12 H12 0.9300 . ? 
C13 C14 1.413(5) . ? 
C14 C15 1.474(5) . ? 
C15 C16 1.250(5) . ? 
C15 H15 0.9300 . ? 
C16 C17 1.494(5) . ? 
C16 H16 0.9300 . ? 
C17 C21 1.358(6) . ? 
C17 C18 1.364(5) . ? 
C18 C19 1.355(5) . ? 
C18 H18 0.9300 . ? 
C19 H19 0.9300 . ? 
C20 C21 1.394(6) . ? 
C20 H20 0.9300 . ? 
C21 H21 0.9300 . ? 
C22 C35 1.413(5) . ? 
C22 C23 1.426(5) . ? 
C22 C27 1.431(5) . ? 
C23 C24 1.354(6) . ? 
C23 H23 0.9300 . ? 
C24 C25 1.407(7) . ? 
C24 H24 0.9300 . ? 
C25 C26 1.346(6) . ? 
C25 H25 0.9300 . ? 
C26 C27 1.420(6) . ? 
C26 H26 0.9300 . ? 
C27 C28 1.387(5) . ? 
C28 C29 1.378(5) . ? 
C28 H28 0.9300 . ? 
C29 C30 1.422(5) . ? 
C29 C34 1.432(5) . ? 
C30 C31 1.352(6) . ? 
C30 H30 0.9300 . ? 
C31 C32 1.405(6) . ? 
C31 H31 0.9300 . ? 
C32 C33 1.350(5) . ? 
C32 H32 0.9300 . ? 
C33 C34 1.421(5) . ? 
C33 H33 0.9300 . ? 
C34 C35 1.418(5) . ? 
C35 C36 1.479(5) . ? 
C36 C37 1.295(5) . ? 
C36 H36 0.9300 . ? 
C37 C38 1.485(5) . ? 
C37 H37 0.9300 . ? 
C38 C39 1.366(5) . ? 
C38 C42 1.379(5) . ? 
C39 C40 1.377(5) . ? 
C39 H39 0.9300 . ? 
C40 H40 0.9300 . ? 
C41 C42 1.383(5) . ? 
C41 H41 0.9300 . ? 
C42 H42 0.9300 . ? 
C43 C44 1.384(5) . ? 
C43 C48 1.385(5) . ? 
C43 H43 0.9300 . ? 
C44 C45 1.401(5) . ? 
C44 C49 1.437(5) . ? 
C45 C46 1.381(5) . ? 
C45 C50 1.445(5) . ? 
C46 C47 1.389(5) . ? 
C46 H46 0.9300 . ? 
C47 C48 1.397(5) . ? 
C47 C51 1.435(5) . ? 
C48 C52 1.442(5) . ? 
C53 C58 1.376(5) . ? 
C53 C54 1.385(5) . ? 
C53 H53 0.9300 . ? 
C54 C55 1.398(5) . ? 
C54 C59 1.439(5) . ? 
C55 C56 1.377(5) . ? 
C55 C60 1.446(5) . ? 
C56 C57 1.396(5) . ? 
C56 H56 0.9300 . ? 
C57 C58 1.397(5) . ? 
C57 C61 1.439(5) . ? 
C58 C62 1.442(5) . ? 
  
loop_ 
 _geom_angle_atom_site_label_1 
 _geom_angle_atom_site_label_2 
 _geom_angle_atom_site_label_3 
 _geom_angle 
 _geom_angle_site_symmetry_1 
 _geom_angle_site_symmetry_3 
 _geom_angle_publ_flag 
C19 N1 C20 115.1(4) . . ? 
C40 N2 C41 115.5(3) . . ? 
C2 C1 C14 123.1(4) . . ? 
C2 C1 C6 117.6(3) . . ? 
C14 C1 C6 119.2(3) . . ? 
C3 C2 C1 120.5(4) . . ? 
C3 C2 H2 119.7 . . ? 
C1 C2 H2 119.7 . . ? 
C2 C3 C4 121.3(5) . . ? 
C2 C3 H3 119.4 . . ? 
C4 C3 H3 119.4 . . ? 
C5 C4 C3 120.7(4) . . ? 
C5 C4 H4 119.6 . . ? 
C3 C4 H4 119.6 . . ? 
C4 C5 C6 120.7(5) . . ? 
C4 C5 H5 119.7 . . ? 
C6 C5 H5 119.7 . . ? 
C7 C6 C5 121.1(4) . . ? 
C7 C6 C1 119.7(3) . . ? 
C5 C6 C1 119.1(4) . . ? 
C6 C7 C8 122.1(3) . . ? 
C6 C7 H7 118.9 . . ? 
C8 C7 H7 118.9 . . ? 
C7 C8 C9 121.2(4) . . ? 
C7 C8 C13 119.7(3) . . ? 
C9 C8 C13 119.1(4) . . ? 
C10 C9 C8 121.1(4) . . ? 
C10 C9 H9 119.5 . . ? 
C8 C9 H9 119.5 . . ? 
C9 C10 C11 120.0(4) . . ? 
C9 C10 H10 120.0 . . ? 
C11 C10 H10 120.0 . . ? 
C12 C11 C10 120.9(4) . . ? 
C12 C11 H11 119.5 . . ? 
C10 C11 H11 119.5 . . ? 
C11 C12 C13 121.9(4) . . ? 
C11 C12 H12 119.1 . . ? 
C13 C12 H12 119.1 . . ? 
C14 C13 C12 123.7(3) . . ? 
C14 C13 C8 119.3(3) . . ? 
C12 C13 C8 116.9(3) . . ? 
C13 C14 C1 119.9(3) . . ? 
C13 C14 C15 123.2(3) . . ? 
C1 C14 C15 116.9(3) . . ? 
C16 C15 C14 132.3(4) . . ? 
C16 C15 H15 113.8 . . ? 
C14 C15 H15 113.8 . . ? 
C15 C16 C17 126.5(5) . . ? 
C15 C16 H16 116.7 . . ? 
C17 C16 H16 116.7 . . ? 
C21 C17 C18 117.0(4) . . ? 
C21 C17 C16 124.3(4) . . ? 
C18 C17 C16 118.7(4) . . ? 
C19 C18 C17 120.2(4) . . ? 
C19 C18 H18 119.9 . . ? 
C17 C18 H18 119.9 . . ? 
N1 C19 C18 124.9(4) . . ? 
N1 C19 H19 117.5 . . ? 
C18 C19 H19 117.5 . . ? 
N1 C20 C21 123.3(4) . . ? 
N1 C20 H20 118.3 . . ? 
C21 C20 H20 118.3 . . ? 
C17 C21 C20 119.3(4) . . ? 
C17 C21 H21 120.3 . . ? 
C20 C21 H21 120.3 . . ? 
C35 C22 C23 123.1(3) . . ? 
C35 C22 C27 119.7(3) . . ? 
C23 C22 C27 117.2(4) . . ? 
C24 C23 C22 121.8(4) . . ? 
C24 C23 H23 119.1 . . ? 
C22 C23 H23 119.1 . . ? 
C23 C24 C25 120.7(5) . . ? 
C23 C24 H24 119.7 . . ? 
C25 C24 H24 119.7 . . ? 
C26 C25 C24 119.6(5) . . ? 
C26 C25 H25 120.2 . . ? 
C24 C25 H25 120.2 . . ? 
C25 C26 C27 122.2(5) . . ? 
C25 C26 H26 118.9 . . ? 
C27 C26 H26 118.9 . . ? 
C28 C27 C26 122.3(4) . . ? 
C28 C27 C22 119.2(4) . . ? 
C26 C27 C22 118.5(4) . . ? 
C29 C28 C27 122.4(4) . . ? 
C29 C28 H28 118.8 . . ? 
C27 C28 H28 118.8 . . ? 
C28 C29 C30 120.9(4) . . ? 
C28 C29 C34 119.3(4) . . ? 
C30 C29 C34 119.8(4) . . ? 
C31 C30 C29 120.6(4) . . ? 
C31 C30 H30 119.7 . . ? 
C29 C30 H30 119.7 . . ? 
C30 C31 C32 120.3(4) . . ? 
C30 C31 H31 119.8 . . ? 
C32 C31 H31 119.8 . . ? 
C33 C32 C31 120.5(4) . . ? 
C33 C32 H32 119.8 . . ? 
C31 C32 H32 119.8 . . ? 
C32 C33 C34 122.3(4) . . ? 
C32 C33 H33 118.8 . . ? 
C34 C33 H33 118.8 . . ? 
C35 C34 C33 123.8(3) . . ? 
C35 C34 C29 119.7(3) . . ? 
C33 C34 C29 116.5(3) . . ? 
C22 C35 C34 119.6(3) . . ? 
C22 C35 C36 117.8(3) . . ? 
C34 C35 C36 122.5(3) . . ? 
C37 C36 C35 126.9(4) . . ? 
C37 C36 H36 116.5 . . ? 
C35 C36 H36 116.5 . . ? 
C36 C37 C38 127.0(4) . . ? 
C36 C37 H37 116.5 . . ? 
C38 C37 H37 116.5 . . ? 
C39 C38 C42 117.5(3) . . ? 
C39 C38 C37 119.0(3) . . ? 
C42 C38 C37 123.6(3) . . ? 
C38 C39 C40 119.4(4) . . ? 
C38 C39 H39 120.3 . . ? 
C40 C39 H39 120.3 . . ? 
N2 C40 C39 124.6(4) . . ? 
N2 C40 H40 117.7 . . ? 
C39 C40 H40 117.7 . . ? 
N2 C41 C42 124.3(4) . . ? 
N2 C41 H41 117.9 . . ? 
C42 C41 H41 117.9 . . ? 
C38 C42 C41 118.7(4) . . ? 
C38 C42 H42 120.7 . . ? 
C41 C42 H42 120.7 . . ? 
C44 C43 C48 120.1(3) . . ? 
C44 C43 H43 120.0 . . ? 
C48 C43 H43 120.0 . . ? 
C43 C44 C45 119.7(3) . . ? 
C43 C44 C49 120.3(3) . . ? 
C45 C44 C49 120.0(3) . . ? 
C46 C45 C44 120.3(3) . . ? 
C46 C45 C50 120.5(3) . . ? 
C44 C45 C50 119.2(3) . . ? 
C45 C46 C47 119.9(3) . . ? 
C45 C46 H46 120.0 . . ? 
C47 C46 H46 120.0 . . ? 
C46 C47 C48 119.9(3) . . ? 
C46 C47 C51 120.2(3) . . ? 
C48 C47 C51 120.0(3) . . ? 
C43 C48 C47 120.1(3) . . ? 
C43 C48 C52 119.2(3) . . ? 
C47 C48 C52 120.7(3) . . ? 
N3 C49 C44 179.3(5) . . ? 
N4 C50 C45 179.2(5) . . ? 
N5 C51 C47 179.3(4) . . ? 
N6 C52 C48 178.4(4) . . ? 
C58 C53 C54 120.5(3) . . ? 
C58 C53 H53 119.8 . . ? 
C54 C53 H53 119.8 . . ? 
C53 C54 C55 119.8(3) . . ? 
C53 C54 C59 119.5(3) . . ? 
C55 C54 C59 120.7(3) . . ? 
C56 C55 C54 120.1(3) . . ? 
C56 C55 C60 119.9(3) . . ? 
C54 C55 C60 120.0(3) . . ? 
C55 C56 C57 119.9(3) . . ? 
C55 C56 H56 120.0 . . ? 
C57 C56 H56 120.0 . . ? 
C56 C57 C58 119.8(3) . . ? 
C56 C57 C61 120.5(3) . . ? 
C58 C57 C61 119.6(3) . . ? 
C53 C58 C57 119.9(3) . . ? 
C53 C58 C62 120.3(3) . . ? 
C57 C58 C62 119.8(3) . . ? 
N7 C59 C54 178.9(4) . . ? 
N8 C60 C55 179.7(5) . . ? 
N9 C61 C57 178.1(4) . . ? 
N10 C62 C58 179.5(5) . . ? 
  
loop_ 
 _geom_torsion_atom_site_label_1 
 _geom_torsion_atom_site_label_2 
 _geom_torsion_atom_site_label_3 
 _geom_torsion_atom_site_label_4 
 _geom_torsion 
 _geom_torsion_site_symmetry_1 
 _geom_torsion_site_symmetry_2 
 _geom_torsion_site_symmetry_3 
 _geom_torsion_site_symmetry_4 
 _geom_torsion_publ_flag 
C14 C1 C2 C3 -180.0(4) . . . . ? 
C6 C1 C2 C3 1.2(6) . . . . ? 
C1 C2 C3 C4 0.5(7) . . . . ? 
C2 C3 C4 C5 -1.3(8) . . . . ? 
C3 C4 C5 C6 0.2(7) . . . . ? 
C4 C5 C6 C7 -178.5(4) . . . . ? 
C4 C5 C6 C1 1.6(6) . . . . ? 
C2 C1 C6 C7 177.8(4) . . . . ? 
C14 C1 C6 C7 -1.1(5) . . . . ? 
C2 C1 C6 C5 -2.2(5) . . . . ? 
C14 C1 C6 C5 178.9(3) . . . . ? 
C5 C6 C7 C8 -178.5(4) . . . . ? 
C1 C6 C7 C8 1.4(6) . . . . ? 
C6 C7 C8 C9 179.8(4) . . . . ? 
C6 C7 C8 C13 -0.5(6) . . . . ? 
C7 C8 C9 C10 -179.0(4) . . . . ? 
C13 C8 C9 C10 1.3(6) . . . . ? 
C8 C9 C10 C11 0.3(7) . . . . ? 
C9 C10 C11 C12 -0.9(7) . . . . ? 
C10 C11 C12 C13 -0.1(7) . . . . ? 
C11 C12 C13 C14 -179.5(4) . . . . ? 
C11 C12 C13 C8 1.7(6) . . . . ? 
C7 C8 C13 C14 -0.9(5) . . . . ? 
C9 C8 C13 C14 178.9(4) . . . . ? 
C7 C8 C13 C12 178.0(4) . . . . ? 
C9 C8 C13 C12 -2.2(5) . . . . ? 
C12 C13 C14 C1 -177.6(3) . . . . ? 
C8 C13 C14 C1 1.2(5) . . . . ? 
C12 C13 C14 C15 1.1(6) . . . . ? 
C8 C13 C14 C15 180.0(3) . . . . ? 
C2 C1 C14 C13 -179.0(3) . . . . ? 
C6 C1 C14 C13 -0.2(5) . . . . ? 
C2 C1 C14 C15 2.1(5) . . . . ? 
C6 C1 C14 C15 -179.1(3) . . . . ? 
C13 C14 C15 C16 47.2(7) . . . . ? 
C1 C14 C15 C16 -133.9(5) . . . . ? 
C14 C15 C16 C17 175.1(4) . . . . ? 
C15 C16 C17 C21 -38.7(7) . . . . ? 
C15 C16 C17 C18 140.9(5) . . . . ? 
C21 C17 C18 C19 1.2(6) . . . . ? 
C16 C17 C18 C19 -178.5(4) . . . . ? 
C20 N1 C19 C18 0.7(7) . . . . ? 
C17 C18 C19 N1 -1.5(7) . . . . ? 
C19 N1 C20 C21 0.4(6) . . . . ? 
C18 C17 C21 C20 -0.2(6) . . . . ? 
C16 C17 C21 C20 179.4(4) . . . . ? 
N1 C20 C21 C17 -0.6(7) . . . . ? 
C35 C22 C23 C24 179.8(4) . . . . ? 
C27 C22 C23 C24 -0.8(6) . . . . ? 
C22 C23 C24 C25 0.2(8) . . . . ? 
C23 C24 C25 C26 0.8(8) . . . . ? 
C24 C25 C26 C27 -1.2(8) . . . . ? 
C25 C26 C27 C28 -179.8(5) . . . . ? 
C25 C26 C27 C22 0.5(7) . . . . ? 
C35 C22 C27 C28 0.1(5) . . . . ? 
C23 C22 C27 C28 -179.2(4) . . . . ? 
C35 C22 C27 C26 179.8(4) . . . . ? 
C23 C22 C27 C26 0.5(6) . . . . ? 
C26 C27 C28 C29 178.9(4) . . . . ? 
C22 C27 C28 C29 -1.5(6) . . . . ? 
C27 C28 C29 C30 -177.3(4) . . . . ? 
C27 C28 C29 C34 1.3(6) . . . . ? 
C28 C29 C30 C31 177.6(4) . . . . ? 
C34 C29 C30 C31 -0.9(6) . . . . ? 
C29 C30 C31 C32 0.6(6) . . . . ? 
C30 C31 C32 C33 0.0(6) . . . . ? 
C31 C32 C33 C34 -0.3(6) . . . . ? 
C32 C33 C34 C35 -178.2(4) . . . . ? 
C32 C33 C34 C29 0.0(5) . . . . ? 
C28 C29 C34 C35 0.3(5) . . . . ? 
C30 C29 C34 C35 178.9(3) . . . . ? 
C28 C29 C34 C33 -178.0(3) . . . . ? 
C30 C29 C34 C33 0.6(5) . . . . ? 
C23 C22 C35 C34 -179.4(4) . . . . ? 
C27 C22 C35 C34 1.3(5) . . . . ? 
C23 C22 C35 C36 -0.7(6) . . . . ? 
C27 C22 C35 C36 180.0(3) . . . . ? 
C33 C34 C35 C22 176.6(3) . . . . ? 
C29 C34 C35 C22 -1.5(5) . . . . ? 
C33 C34 C35 C36 -2.0(6) . . . . ? 
C29 C34 C35 C36 179.9(3) . . . . ? 
C22 C35 C36 C37 131.5(4) . . . . ? 
C34 C35 C36 C37 -49.9(6) . . . . ? 
C35 C36 C37 C38 180.0(4) . . . . ? 
C36 C37 C38 C39 -161.6(4) . . . . ? 
C36 C37 C38 C42 18.5(6) . . . . ? 
C42 C38 C39 C40 -1.4(6) . . . . ? 
C37 C38 C39 C40 178.7(4) . . . . ? 
C41 N2 C40 C39 -0.6(6) . . . . ? 
C38 C39 C40 N2 1.3(7) . . . . ? 
C40 N2 C41 C42 0.0(6) . . . . ? 
C39 C38 C42 C41 0.8(6) . . . . ? 
C37 C38 C42 C41 -179.3(4) . . . . ? 
N2 C41 C42 C38 -0.1(6) . . . . ? 
C48 C43 C44 C45 0.1(6) . . . . ? 
C48 C43 C44 C49 -179.6(3) . . . . ? 
C43 C44 C45 C46 -0.4(5) . . . . ? 
C49 C44 C45 C46 179.2(3) . . . . ? 
C43 C44 C45 C50 178.3(3) . . . . ? 
C49 C44 C45 C50 -2.1(5) . . . . ? 
C44 C45 C46 C47 0.2(5) . . . . ? 
C50 C45 C46 C47 -178.4(3) . . . . ? 
C45 C46 C47 C48 0.3(5) . . . . ? 
C45 C46 C47 C51 -179.5(3) . . . . ? 
C44 C43 C48 C47 0.4(6) . . . . ? 
C44 C43 C48 C52 -178.7(4) . . . . ? 
C46 C47 C48 C43 -0.6(5) . . . . ? 
C51 C47 C48 C43 179.2(4) . . . . ? 
C46 C47 C48 C52 178.5(3) . . . . ? 
C51 C47 C48 C52 -1.6(6) . . . . ? 
C58 C53 C54 C55 -0.7(6) . . . . ? 
C58 C53 C54 C59 -179.8(3) . . . . ? 
C53 C54 C55 C56 -0.1(5) . . . . ? 
C59 C54 C55 C56 178.9(4) . . . . ? 
C53 C54 C55 C60 179.8(4) . . . . ? 
C59 C54 C55 C60 -1.1(5) . . . . ? 
C54 C55 C56 C57 0.9(5) . . . . ? 
C60 C55 C56 C57 -179.1(3) . . . . ? 
C55 C56 C57 C58 -0.7(5) . . . . ? 
C55 C56 C57 C61 -179.6(3) . . . . ? 
C54 C53 C58 C57 0.9(6) . . . . ? 
C54 C53 C58 C62 179.8(4) . . . . ? 
C56 C57 C58 C53 -0.2(5) . . . . ? 
C61 C57 C58 C53 178.7(4) . . . . ? 
C56 C57 C58 C62 -179.0(4) . . . . ? 
C61 C57 C58 C62 -0.2(5) . . . . ? 
  
_refine_diff_density_max    0.536 
_refine_diff_density_min   -0.357 
_refine_diff_density_rms    0.060 
  
_shelxl_version_number 2013-4 
  
_shelx_res_file 
; 
TITL mo_d8v211043_0m_a.res in P-1 
CELL 0.71073 7.4656 9.1294 34.5197 90.96 92.04 91.918 
ZERR 4 0.0012 0.0015 0.0056 0.004 0.004 0.004 
LATT 1 
SFAC C  H  N 
UNIT 124 68 20 
OMIT 0   0   4 
OMIT     0   1   0 
OMIT     0   1   1 
OMIT     0   3   6 
OMIT     0  -1   4 
OMIT  -3.00  50.00 
L.S. 7 
ACTA 
BOND $H 
FMAP 2 
PLAN 20 
LIST 4 
conf 
htab 
mpla 
wpdb -1 
size 0.19 0.12 0.06 
TEMP 20 
WGHT    0.098000    1.180300 
EXTI    0.014291 
FVAR       0.47701 
N1    3    0.088712    0.381735    0.786709    11.00000    0.07268    0.09872 = 
         0.05932    0.02445   -0.00060    0.00039 
N2    3    0.607509    0.619443    0.713396    11.00000    0.07389    0.07305 = 
         0.05858    0.01490    0.00718    0.00777 
N3    3   -0.164279   -0.308405    0.866934    11.00000    0.10979    0.06743 = 
         0.10128   -0.00536    0.01108   -0.01675 
N4    3   -0.118840   -0.016573    0.784429    11.00000    0.10849    0.09812 = 
         0.07156   -0.01422   -0.01569    0.00904 
N5    3    0.199751    0.500004    0.919157    11.00000    0.12137    0.06913 = 
         0.09886    0.01148   -0.00434   -0.02254 
N6    3    0.172774    0.194469    1.002214    11.00000    0.12322    0.09606 = 
         0.05797    0.01076   -0.00443   -0.01017 
N7    3    0.666862    0.805278    0.496365    11.00000    0.10572    0.09183 = 
         0.06031    0.01492    0.01066    0.01532 
N8    3    0.689556    0.495089    0.577821    11.00000    0.09525    0.06999 = 
         0.09650    0.01020    0.01082    0.01940 
N9    3    0.411883    1.000134    0.712092    11.00000    0.11930    0.09728 = 
         0.06780   -0.00293    0.01499    0.01797 
N10   3    0.385509    1.296040    0.631552    11.00000    0.10239    0.07321 = 
         0.08712   -0.00132    0.00181    0.02248 
C1    1   -0.003487    0.937144    0.633246    11.00000    0.04667    0.05188 = 
         0.06777   -0.00169   -0.00410    0.00160 
C2    1   -0.054091    1.002571    0.668651    11.00000    0.06524    0.07694 = 
         0.08347   -0.01004    0.00019    0.01226 
AFIX  43 
H2    2   -0.055633    0.947354    0.691041    11.00000   -1.20000 
AFIX   0 
C3    1   -0.100546    1.146053    0.670078    11.00000    0.07320    0.07794 = 
         0.10952   -0.03487    0.00289    0.01258 
AFIX  43 
H3    2   -0.132351    1.187350    0.693558    11.00000   -1.20000 
AFIX   0 
C4    1   -0.101174    1.231415    0.637128    11.00000    0.06809    0.06280 = 
         0.15810   -0.00923   -0.00169    0.01019 
AFIX  43 
H4    2   -0.135630    1.328217    0.638748    11.00000   -1.20000 
AFIX   0 
C5    1   -0.052768    1.175910    0.603101    11.00000    0.06767    0.05265 = 
         0.12474    0.01316   -0.00437    0.00698 
AFIX  43 
H5    2   -0.053561    1.234623    0.581342    11.00000   -1.20000 
AFIX   0 
C6    1    0.000152    1.027328    0.599835    11.00000    0.04610    0.05223 = 
         0.08219    0.01215   -0.00659    0.00267 
C7    1    0.054137    0.970277    0.565226    11.00000    0.06242    0.07009 = 
         0.06881    0.03055   -0.00280    0.00147 
AFIX  43 
H7    2    0.058538    1.030680    0.543828    11.00000   -1.20000 
AFIX   0 
C8    1    0.102357    0.825303    0.561159    11.00000    0.05220    0.06603 = 
         0.04994    0.00959   -0.00189    0.00354 
C9    1    0.157333    0.768454    0.525032    11.00000    0.08140    0.10145 = 
         0.05632    0.01476    0.00062    0.00462 
AFIX  43 
H9    2    0.163015    0.829751    0.503831    11.00000   -1.20000 
AFIX   0 
C10   1    0.201576    0.626397    0.520999    11.00000    0.08537    0.11517 = 
         0.06665   -0.01762    0.00827    0.01040 
AFIX  43 
H10   2    0.237772    0.591029    0.497201    11.00000   -1.20000 
AFIX   0 
C11   1    0.192837    0.533231    0.552532    11.00000    0.08642    0.07318 = 
         0.07721   -0.01384    0.00092    0.01655 
AFIX  43 
H11   2    0.221712    0.435517    0.549451    11.00000   -1.20000 
AFIX   0 
C12   1    0.143077    0.582853    0.587452    11.00000    0.07823    0.05043 = 
         0.06498   -0.00275   -0.00298    0.00761 
AFIX  43 
H12   2    0.138306    0.518213    0.607956    11.00000   -1.20000 
AFIX   0 
C13   1    0.097681    0.731346    0.593791    11.00000    0.04437    0.05029 = 
         0.05474    0.00434    0.00052    0.00167 
C14   1    0.046285    0.788079    0.629909    11.00000    0.04866    0.05403 = 
         0.05478    0.01050   -0.00127    0.00184 
C15   1    0.037385    0.699620    0.665155    11.00000    0.05857    0.07321 = 
         0.06751    0.01808    0.00067   -0.00137 
AFIX  43 
H15   2   -0.067666    0.709955    0.678485    11.00000   -1.20000 
AFIX   0 
C16   1    0.143963    0.613393    0.680556    11.00000    0.06389    0.10926 = 
         0.09237    0.03709   -0.00411   -0.01089 
AFIX  43 
H16   2    0.246522    0.593774    0.667127    11.00000   -1.20000 
AFIX   0 
C17   1    0.123151    0.538678    0.718372    11.00000    0.05325    0.08159 = 
         0.06258    0.02513   -0.00588   -0.00928 
C18   1    0.173031    0.396887    0.721425    11.00000    0.07259    0.07614 = 
         0.06597    0.00363    0.00386   -0.00288 
AFIX  43 
H18   2    0.221592    0.349568    0.700373    11.00000   -1.20000 
AFIX   0 
C19   1    0.152079    0.324709    0.755029    11.00000    0.07780    0.07062 = 
         0.08255    0.02434    0.00740    0.00918 
AFIX  43 
H19   2    0.185064    0.227427    0.755713    11.00000   -1.20000 
AFIX   0 
C20   1    0.041368    0.521561    0.784043    11.00000    0.06645    0.10761 = 
         0.06467   -0.01639    0.00564   -0.00523 
AFIX  43 
H20   2   -0.003662    0.566986    0.805780    11.00000   -1.20000 
AFIX   0 
C21   1    0.056174    0.602395    0.750350    11.00000    0.06846    0.06244 = 
         0.09566    0.00885    0.00098   -0.00315 
AFIX  43 
H21   2    0.020547    0.699001    0.749770    11.00000   -1.20000 
AFIX   0 
C22   1    0.592466    0.252691    0.907139    11.00000    0.05361    0.05955 = 
         0.06295    0.00996    0.00356   -0.00471 
C23   1    0.657587    0.397783    0.916876    11.00000    0.08088    0.07262 = 
         0.08158   -0.00013   -0.00018   -0.01050 
AFIX  43 
H23   2    0.661143    0.467661    0.897598    11.00000   -1.20000 
AFIX   0 
C24   1    0.714375    0.436573    0.953420    11.00000    0.10035    0.08789 = 
         0.09940   -0.02071   -0.00326   -0.01615 
AFIX  43 
H24   2    0.755685    0.532221    0.958830    11.00000   -1.20000 
AFIX   0 
C25   1    0.711516    0.333652    0.983284    11.00000    0.10825    0.13096 = 
         0.06578   -0.01964   -0.00700   -0.00781 
AFIX  43 
H25   2    0.749310    0.361338    1.008387    11.00000   -1.20000 
AFIX   0 
C26   1    0.653733    0.194875    0.975289    11.00000    0.08924    0.11786 = 
         0.06513    0.00724    0.00302   -0.00750 
AFIX  43 
H26   2    0.654462    0.127246    0.995139    11.00000   -1.20000 
AFIX   0 
C27   1    0.591663    0.148146    0.937567    11.00000    0.05681    0.07684 = 
         0.05707    0.00748    0.00596   -0.00086 
C28   1    0.531581    0.005186    0.929314    11.00000    0.06930    0.06947 = 
         0.07278    0.02846    0.00812   -0.00373 
AFIX  43 
H28   2    0.533979   -0.062761    0.949083    11.00000   -1.20000 
AFIX   0 
C29   1    0.468499   -0.039776    0.892900    11.00000    0.05271    0.05930 = 
         0.06725    0.01075    0.00613    0.00293 
C30   1    0.400958   -0.185671    0.885857    11.00000    0.06711    0.05022 = 
         0.11322    0.01250    0.01478   -0.00282 
AFIX  43 
H30   2    0.403281   -0.252785    0.905827    11.00000   -1.20000 
AFIX   0 
C31   1    0.333423   -0.227631    0.850394    11.00000    0.06880    0.05611 = 
         0.12121   -0.01138    0.01633   -0.00192 
AFIX  43 
H31   2    0.288560   -0.323052    0.846190    11.00000   -1.20000 
AFIX   0 
C32   1    0.330644   -0.127836    0.819847    11.00000    0.06430    0.07161 = 
         0.09362   -0.01788    0.00460   -0.00596 
AFIX  43 
H32   2    0.283910   -0.157647    0.795541    11.00000   -1.20000 
AFIX   0 
C33   1    0.395356    0.011058    0.825532    11.00000    0.05551    0.06974 = 
         0.07164   -0.00058   -0.00028   -0.00069 
AFIX  43 
H33   2    0.392584    0.074894    0.804821    11.00000   -1.20000 
AFIX   0 
C34   1    0.467554    0.063116    0.862054    11.00000    0.04606    0.05386 = 
         0.06288    0.00806    0.00658    0.00406 
C35   1    0.531984    0.209184    0.869309    11.00000    0.05078    0.05314 = 
         0.05933    0.01050    0.00245    0.00156 
C36   1    0.535104    0.320850    0.838784    11.00000    0.06620    0.06001 = 
         0.06464    0.00886    0.00229    0.00399 
AFIX  43 
H36   2    0.485633    0.410237    0.844764    11.00000   -1.20000 
AFIX   0 
C37   1    0.599430    0.307380    0.804598    11.00000    0.06582    0.06297 = 
         0.07152    0.01101    0.00829    0.01116 
AFIX  43 
H37   2    0.648938    0.217977    0.798652    11.00000   -1.20000 
AFIX   0 
C38   1    0.602670    0.419256    0.773875    11.00000    0.05094    0.05758 = 
         0.06170    0.01344    0.00392    0.00520 
C39   1    0.627594    0.375475    0.736477    11.00000    0.07917    0.05829 = 
         0.06874   -0.00060    0.00960    0.00155 
AFIX  43 
H39   2    0.644631    0.277302    0.730532    11.00000   -1.20000 
AFIX   0 
C40   1    0.627278    0.477965    0.707648    11.00000    0.07786    0.08364 = 
         0.05594    0.00160    0.01069    0.00104 
AFIX  43 
H40   2    0.642049    0.444999    0.682362    11.00000   -1.20000 
AFIX   0 
C41   1    0.585255    0.661228    0.750002    11.00000    0.07863    0.06547 = 
         0.06449    0.00618    0.00387    0.01335 
AFIX  43 
H41   2    0.570943    0.760402    0.755126    11.00000   -1.20000 
AFIX   0 
C42   1    0.582027    0.566792    0.780911    11.00000    0.07646    0.06814 = 
         0.04750    0.00944    0.00564    0.01061 
AFIX  43 
H42   2    0.566248    0.602086    0.805944    11.00000   -1.20000 
AFIX   0 
C43   1    0.008564   -0.008839    0.922142    11.00000    0.07568    0.05347 = 
         0.05686    0.01164    0.01456   -0.00279 
AFIX  43 
H43   2    0.000612   -0.078217    0.941483    11.00000   -1.20000 
AFIX   0 
C44   1   -0.043700   -0.046567    0.884303    11.00000    0.05555    0.05132 = 
         0.06387    0.00307    0.01064   -0.00090 
C45   1   -0.031250    0.058275    0.855271    11.00000    0.05234    0.05805 = 
         0.05318    0.00071    0.00362    0.00376 
C46   1    0.031849    0.199056    0.864301    11.00000    0.05941    0.05824 = 
         0.05644    0.01386    0.00372    0.00145 
AFIX  43 
H46   2    0.039616    0.268463    0.844964    11.00000   -1.20000 
AFIX   0 
C47   1    0.083719    0.236904    0.902301    11.00000    0.05849    0.04938 = 
         0.05278    0.00736    0.00555   -0.00523 
C48   1    0.072688    0.132151    0.931220    11.00000    0.06365    0.05211 = 
         0.05076    0.00865    0.00267    0.00056 
C49   1   -0.111495   -0.192358    0.874801    11.00000    0.07015    0.06191 = 
         0.07566    0.00328    0.01013    0.00127 
C50   1   -0.081445    0.016395    0.815697    11.00000    0.07024    0.06688 = 
         0.06693    0.00022   -0.00089    0.01134 
C51   1    0.148159    0.383349    0.911894    11.00000    0.07958    0.05729 = 
         0.06402    0.01310    0.00102   -0.01036 
C52   1    0.129942    0.168335    0.970674    11.00000    0.07965    0.06048 = 
         0.06395    0.01567    0.01019   -0.00472 
C53   1    0.529059    1.001881    0.576519    11.00000    0.06155    0.06498 = 
         0.05737    0.01430   -0.00511    0.00620 
AFIX  43 
H53   2    0.524346    1.073084    0.557590    11.00000   -1.20000 
AFIX   0 
C54   1    0.582031    0.862312    0.566996    11.00000    0.05215    0.06199 = 
         0.04915    0.00878    0.00115    0.00720 
C55   1    0.591181    0.755690    0.595515    11.00000    0.04874    0.05449 = 
         0.05040    0.00702    0.00106    0.00479 
C56   1    0.548007    0.789482    0.632994    11.00000    0.05457    0.05896 = 
         0.05508    0.01234   -0.00029    0.00387 
AFIX  43 
H56   2    0.555673    0.718856    0.652032    11.00000   -1.20000 
AFIX   0 
C57   1    0.492730    0.929816    0.642387    11.00000    0.05133    0.06643 = 
         0.04877    0.00245    0.00149    0.00140 
C58   1    0.483343    1.036012    0.613781    11.00000    0.05192    0.05571 = 
         0.05799    0.00599   -0.00204    0.00831 
C59   1    0.629649    0.829338    0.527843    11.00000    0.06871    0.06578 = 
         0.05584    0.01246   -0.00071    0.00857 
C60   1    0.645881    0.609699    0.585668    11.00000    0.06151    0.06544 = 
         0.06255    0.01344    0.00439    0.01107 
C61   1    0.448365    0.966940    0.681498    11.00000    0.07621    0.06917 = 
         0.06281    0.00138    0.00381    0.00768 
C62   1    0.428911    1.181673    0.623599    11.00000    0.06395    0.06883 = 
         0.07154    0.00476   -0.00415    0.00985 
HKLF 4 
  
REM  mo_d8v211043_0m_a.res in P-1 
REM R1 =  0.0763 for    4241 Fo > 4sig(Fo)  and  0.1539 for all    8237 data 
REM    650 parameters refined using      0 restraints 
  
END 
  
WGHT      0.0901      1.2906 
  
REM No hydrogen bonds found for HTAB generation 
  
REM Highest difference peak  0.536,  deepest hole -0.357,  1-sigma level  0.060 
Q1    1   0.0940  0.7043  0.7021  11.00000  0.05    0.54 
Q2    1   0.4849  1.1964  0.6215  11.00000  0.05    0.20 
Q3    1  -0.0362 -0.2779  0.8685  11.00000  0.05    0.19 
Q4    1  -0.1085 -0.1993  0.8872  11.00000  0.05    0.19 
Q5    1  -0.0013 -0.2029  0.8779  11.00000  0.05    0.18 
Q6    1   0.3395 -0.3364  0.8704  11.00000  0.05    0.18 
Q7    1  -0.0479 -0.2562  0.8429  11.00000  0.05    0.18 
Q8    1   0.6327  1.2687  0.6300  11.00000  0.05    0.18 
Q9    1   0.1368  0.4180  0.5486  11.00000  0.05    0.18 
Q10   1   0.6907  0.5407  0.5538  11.00000  0.05    0.18 
Q11   1   0.2160  0.4416  0.9461  11.00000  0.05    0.18 
Q12   1   0.2871 -0.2246  0.8771  11.00000  0.05    0.18 
Q13   1  -0.1061 -0.1368  0.8163  11.00000  0.05    0.17 
Q14   1   0.5745  0.0229  0.8214  11.00000  0.05    0.17 
Q15   1  -0.2330  1.1928  0.6115  11.00000  0.05    0.17 
Q16   1   0.4359 -0.2165  0.8800  11.00000  0.05    0.17 
Q17   1   0.3798  1.2061  0.6276  11.00000  0.05    0.17 
Q18   1   0.3102 -0.3550  0.8604  11.00000  0.05    0.17 
Q19   1  -0.0665  1.2063  0.6187  11.00000  0.05    0.17 
Q20   1   0.4303  1.3282  0.6327  11.00000  0.05    0.17 
; 
_shelx_res_checksum    8123 
  
_shelx_hkl_file 
; 
   1   0   0    3.00    0.90 
  -2   0   0 5150.78  155.48 
   2   0   0 5141.79  155.68 
  -3   0   0    9.00    2.20 
   3   0   0   11.10    2.40 
  -4   0   0  644.24   24.30 
   4   0   0  665.03   24.80 
  -5   0   0   24.80    4.90 
  -6   0   0    6.10    2.90 
   6   0   0    7.50    3.60 
  -7   0   0    5.20    3.00 
   7   0   0   -3.90    2.50 
  -8   0   0   -1.40    3.00 
   8   0   0   -2.80    3.20 
  -9   0   0    4.80    3.60 
  -9   1   0    2.20    3.20 
   8  -1   0    0.30    3.20 
  -8   1   0   -0.70    2.70 
   7  -1   0    1.00    3.00 
  -7   1   0    2.20    2.70 
   6  -1   0   -0.70    2.70 
  -6   1   0    0.60    1.80 
   5  -1   0   53.79    6.30 
  -5   1   0   54.89    5.80 
  -5   1   0   58.19    5.90 
   4  -1   0   34.20    4.60 
  -4   1   0   35.40    4.20 
  -4   1   0   39.90    4.60 
   3  -1   0    5.90    2.20 
  -3   1   0    9.20    2.50 
  -3   1   0    8.30    2.00 
   2  -1   0 4811.82  147.59 
  -2   1   0 4879.71  147.69 
  -2   1   0 4866.61  147.29 
   1  -1   0   96.79    4.00 
   1  -1   0   98.19    4.70 
   1  -1   0   94.09    4.00 
  -1   1   0   97.49    4.00 
  -1   1   0   99.09    3.90 
  -1   1   0   98.29    4.50 
  -1   1   0   95.59    4.10 
  -1   1   0   95.29    4.70 
   0  -1   0    0.20    0.30 
   0  -1   0    0.20    0.30 
   0   1   0   -0.40    0.20 
  -1  -1   0   59.89    3.10 
  -1  -1   0   54.19    3.00 
  -1  -1   0   57.39    3.20 
  -1  -1   0   66.89    2.60 
   1   1   0   66.09    2.60 
   1   1   0   62.79    3.30 
   1   1   0   59.99    3.00 
  -2  -1   0 4094.39  124.39 
  -2  -1   0 4265.37  124.89 
   2   1   0 4053.09  124.99 
  -3  -1   0    3.70    1.40 
   3   1   0    1.10    1.40 
  -4  -1   0  886.11   31.10 
   4   1   0  908.71   31.60 
  -5  -1   0    7.60    2.70 
   5   1   0    9.70    3.20 
  -6  -1   0   -1.20    2.00 
  -6  -1   0    3.20    2.20 
   6   1   0   -2.40    2.10 
  -7  -1   0    1.70    2.00 
   7   1   0    1.90    2.80 
  -8  -1   0    0.00    2.90 
   8   1   0   -4.70    3.50 
  -9  -1   0    7.20    4.10 
  -9   2   0    4.80    3.80 
  -8   2   0    3.40    3.00 
   7  -2   0   -0.70    2.90 
  -7   2   0   -0.10    2.10 
   6  -2   0   35.80    6.70 
  -6   2   0   43.40    6.30 
   5  -2   0    9.80    3.60 
  -5   2   0    4.20    2.60 
   4  -2   0  364.76   23.20 
  -4   2   0  446.56   22.30 
   3  -2   0   17.40    3.40 
   3  -2   0   12.10    1.60 
  -3   2   0   18.40    3.20 
  -3   2   0   13.70    3.00 
  -3   2   0   14.20    1.90 
   2  -2   0  251.07   11.10 
   2  -2   0  245.38    9.70 
   2  -2   0  247.58    9.50 
   2  -2   0  243.68   10.30 
   2  -2   0  251.87    9.80 
  -2   2   0  249.78    9.70 
  -2   2   0  259.17   11.20 
  -2   2   0  252.87   10.70 
  -2   2   0  246.18    9.20 
  -2   2   0  251.17    9.70 
   1  -2   0   94.59    5.00 
   1  -2   0   81.19    5.20 
  -1   2   0   88.59    4.70 
  -1   2   0   84.39    5.10 
  -1   2   0   81.49    5.80 
  -1   2   0   90.09    4.70 
   0  -2   0  112.79    5.50 
   0  -2   0  111.59    4.60 
   0  -2   0  111.39    6.10 
   0  -2   0  112.79    5.70 
   0   2   0  110.99    6.00 
   0   2   0  110.39    5.70 
   0   2   0  109.49    5.40 
  -1  -2   0   21.20    2.50 
  -1  -2   0   18.70    2.30 
  -1  -2   0   19.90    2.80 
   1   2   0   17.00    2.80 
  -2  -2   0  258.17    8.70 
  -2  -2   0  245.08   10.10 
  -2  -2   0  251.57    9.90 
  -2  -2   0  282.77   10.20 
   2   2   0  228.98    9.70 
   2   2   0  233.08   10.40 
   2   2   0  245.28   10.20 
  -3  -2   0    8.80    1.80 
  -3  -2   0    6.30    2.60 
   3   2   0    7.10    2.00 
   3   2   0    7.60    1.90 
   3   2   0   10.80    2.10 
   3   2   0    7.90    1.60 
  -4  -2   0  353.76   14.00 
   4   2   0  351.56   14.60 
  -5  -2   0    2.10    1.90 
   5   2   0    0.80    2.30 
  -6  -2   0   41.30    5.10 
  -6  -2   0   37.70    5.60 
   6   2   0   47.30    6.30 
  -7  -2   0    0.00    2.00 
   7   2   0    1.70    2.80 
  -8  -2   0    3.50    2.90 
   8   2   0    6.40    3.70 
  -9  -2   0    6.10    4.00 
  -9   3   0    1.70    3.60 
  -8   3   0    7.20    4.00 
  -7   3   0    1.70    2.60 
   6  -3   0    6.10    3.80 
  -6   3   0    6.50    3.20 
   5  -3   0   21.60    3.80 
   5  -3   0   24.60    5.30 
  -5   3   0   14.30    3.70 
   4  -3   0  101.69    5.90 
   4  -3   0  100.69    6.40 
   4  -3   0  102.59    5.60 
   4  -3   0  108.99    8.50 
   4  -3   0  102.49    7.00 
  -4   3   0  100.19    5.90 
  -4   3   0  100.49    8.00 
  -4   3   0  103.59    7.80 
   3  -3   0    0.50    1.50 
   3  -3   0    1.60    1.30 
   3  -3   0    0.80    1.50 
   3  -3   0    1.60    1.10 
   3  -3   0    1.30    1.90 
  -3   3   0    0.90    1.20 
  -3   3   0    3.20    2.00 
  -3   3   0    2.50    1.60 
   2  -3   0  548.35   20.40 
   2  -3   0  578.54   21.50 
  -2   3   0  567.34   21.50 
  -2   3   0  562.74   20.80 
  -2   3   0  565.94   20.00 
  -2   3   0  572.94   20.90 
  -2   3   0  568.64   20.40 
   1  -3   0  141.59    7.40 
   1  -3   0  146.79    7.10 
   1  -3   0  148.69    7.80 
   1  -3   0  144.79    8.20 
  -1   3   0  149.09    7.50 
  -1   3   0  142.49    7.30 
  -1   3   0  145.09    7.30 
  -1   3   0  144.89    8.10 
  -1   3   0  152.38    7.10 
   0  -3   0  129.49    5.70 
   0  -3   0  126.09    6.90 
   0  -3   0  124.69    7.10 
   0  -3   0  130.19    7.60 
   0   3   0  132.29    5.70 
   0   3   0  120.19    6.70 
   0   3   0  130.29    7.70 
  -1  -3   0    7.70    2.30 
  -1  -3   0   17.70    2.50 
   1   3   0   10.80    2.40 
   1   3   0    9.70    2.10 
   1   3   0   12.20    2.70 
  -2  -3   0  482.85   18.40 
  -2  -3   0  495.45   19.20 
  -2  -3   0  493.15   18.70 
   2   3   0  507.95   18.50 
   2   3   0  496.75   19.60 
  -3  -3   0   85.79    4.20 
  -3  -3   0   81.09    5.50 
  -3  -3   0   94.59    5.80 
   3   3   0   77.29    6.30 
   3   3   0   91.09    4.80 
   3   3   0   78.39    5.80 
   3   3   0   83.29    5.30 
  -4  -3   0  121.29    6.20 
  -4  -3   0  122.89    7.10 
   4   3   0  104.49    7.30 
   4   3   0  114.29    8.00 
   4   3   0  119.99    6.90 
   4   3   0  117.89    6.60 
  -5  -3   0   -0.40    1.60 
  -5  -3   0    1.70    1.80 
   5   3   0   -0.50    1.80 
   5   3   0    6.60    2.80 
   5   3   0    4.40    2.40 
  -6  -3   0    8.50    2.50 
   6   3   0   20.30    4.30 
   6   3   0    4.50    3.30 
  -7  -3   0   -2.90    1.90 
  -7  -3   0    0.40    2.30 
   7   3   0   -0.20    2.80 
  -8  -3   0    1.90    3.30 
   8   3   0    7.30    4.20 
  -9   4   0    0.80    3.70 
   8  -4   0   -1.70    2.20 
  -8   4   0    1.20    3.00 
   7  -4   0    1.10    3.10 
  -7   4   0   -1.10    2.30 
   6  -4   0   -1.10    2.80 
  -6   4   0    1.60    2.50 
   5  -4   0   47.10    5.90 
   5  -4   0   33.60    4.10 
  -5   4   0   41.90    5.80 
  -5   4   0   38.90    4.20 
   4  -4   0  101.59    6.90 
   4  -4   0   91.79    7.70 
  -4   4   0   94.39    7.80 
  -4   4   0   98.09    6.50 
   3  -4   0    1.80    1.30 
   3  -4   0    7.10    2.50 
   3  -4   0    0.80    1.70 
  -3   4   0    3.60    1.80 
  -3   4   0    1.50    1.90 
  -3   4   0    2.80    1.50 
  -3   4   0    3.20    1.80 
  -3   4   0    1.00    1.80 
   2  -4   0  511.35   21.60 
   2  -4   0  528.75   21.00 
  -2   4   0  542.15   21.30 
  -2   4   0  532.75   20.10 
  -2   4   0  533.65   20.30 
  -2   4   0  511.75   20.30 
  -2   4   0  522.85   20.90 
   1  -4   0  140.39    7.30 
   1  -4   0  131.29    8.10 
   1  -4   0  138.09    8.90 
   1  -4   0  132.89    8.20 
  -1   4   0  120.59    7.60 
  -1   4   0  146.09    9.00 
  -1   4   0  138.29    7.10 
  -1   4   0  146.59    7.70 
  -1   4   0  138.59    7.90 
   0  -4   0  613.24   24.10 
   0  -4   0  585.94   20.70 
   0  -4   0  606.84   22.90 
   0  -4   0  595.84   23.30 
   0   4   0  606.94   20.60 
   0   4   0  605.54   22.80 
   0   4   0  629.54   24.20 
   0   4   0  588.14   21.10 
  -1  -4   0   27.50    2.30 
  -1  -4   0   28.20    3.90 
  -1  -4   0   16.80    3.70 
  -1  -4   0   24.00    3.40 
   1   4   0   29.30    4.30 
   1   4   0   28.10    3.70 
   1   4   0   19.20    3.50 
  -2  -4   0  206.58   11.70 
  -2  -4   0  232.38   11.70 
  -2  -4   0  236.58   11.30 
   2   4   0  243.38   11.90 
   2   4   0  220.78   11.10 
   2   4   0  228.18   12.50 
  -3  -4   0   -0.20    1.80 
  -3  -4   0    0.10    1.60 
  -3  -4   0    0.10    1.70 
   3   4   0   -0.40    2.30 
   3   4   0    1.40    1.50 
   3   4   0   -0.90    1.00 
  -4  -4   0   50.69    5.10 
   4   4   0   39.40    5.20 
   4   4   0   46.80    6.20 
  -5  -4   0   13.10    2.60 
  -5  -4   0   11.30    3.20 
   5   4   0   13.70    3.60 
   5   4   0   15.00    4.20 
  -6  -4   0    1.10    1.90 
   6   4   0    4.90    2.80 
   6   4   0    9.20    3.30 
  -7  -4   0    1.00    1.90 
  -7  -4   0   -2.80    2.00 
   7   4   0   -1.30    2.80 
   7   4   0   -3.40    3.10 
   7   4   0    6.40    3.40 
   8   4   0    6.20    4.20 
   8   4   0    5.30    4.50 
   8   4   0   -0.50    3.80 
   8  -5   0   -5.70    4.50 
   8  -5   0    2.30    3.30 
  -8   5   0    7.50    3.30 
   7  -5   0    1.40    2.70 
   7  -5   0    2.30    4.20 
  -7   5   0    5.70    3.10 
   6  -5   0    4.00    3.50 
   6  -5   0    0.60    2.40 
  -6   5   0    1.10    1.90 
  -6   5   0    1.60    2.30 
   5  -5   0    4.90    3.10 
   5  -5   0    6.80    3.00 
   5  -5   0    4.50    2.40 
  -5   5   0    3.90    2.60 
  -5   5   0    3.90    2.20 
   4  -5   0   25.00    4.80 
   4  -5   0   27.30    4.30 
   4  -5   0   21.00    4.70 
  -4   5   0   24.50    4.80 
  -4   5   0   29.30    4.30 
  -4   5   0   26.30    4.30 
   3  -5   0   30.60    4.00 
   3  -5   0   26.20    3.50 
   3  -5   0   26.70    4.40 
  -3   5   0   29.50    4.90 
  -3   5   0   30.60    5.30 
  -3   5   0   27.80    3.90 
  -3   5   0   27.20    4.30 
   2  -5   0   74.29    7.30 
   2  -5   0   69.39    6.60 
   2  -5   0   66.79    6.00 
  -2   5   0   75.09    6.10 
  -2   5   0   66.49    5.60 
  -2   5   0   77.09    7.00 
  -2   5   0   74.29    6.10 
  -2   5   0   54.29    7.00 
   1  -5   0   61.19    6.70 
   1  -5   0   54.49    5.50 
   1  -5   0   54.29    5.90 
   1  -5   0   50.89    4.50 
  -1   5   0   57.59    5.00 
  -1   5   0   58.79    4.70 
  -1   5   0   52.49    5.30 
  -1   5   0   64.59    6.60 
  -1   5   0   52.19    5.30 
   0  -5   0 1495.45   50.49 
   0  -5   0 1417.46   46.40 
   0  -5   0 1444.06   51.19 
   0  -5   0 1434.16   49.30 
   0   5   0 1542.15   51.69 
   0   5   0 1439.86   49.20 
   0   5   0 1376.26   46.10 
   0   5   0 1352.06   49.20 
   0   5   0 1439.36   47.00 
  -1  -5   0  100.59    5.40 
  -1  -5   0   92.79    8.10 
  -1  -5   0   99.09    7.90 
  -1  -5   0   99.29    7.40 
   1   5   0  100.29    5.30 
   1   5   0   96.49    7.20 
   1   5   0  107.69    8.80 
  -2  -5   0  251.27   13.30 
  -2  -5   0  244.98   12.80 
  -2  -5   0  233.48   13.60 
   2   5   0  231.28   13.20 
   2   5   0  239.38   14.60 
  -3  -5   0   30.30    4.80 
  -3  -5   0   29.80    4.40 
   3   5   0   29.10    5.90 
   3   5   0   22.40    4.50 
  -4  -5   0   33.80    5.20 
  -4  -5   0   43.90    5.40 
   4   5   0   31.00    5.40 
   4   5   0   43.20    6.60 
  -5  -5   0    3.90    2.40 
   5   5   0    4.30    3.50 
   5   5   0    5.10    3.60 
  -6  -5   0    5.40    2.80 
   6   5   0    5.70    3.50 
  -7  -5   0    2.10    3.30 
  -7  -5   0    4.20    1.90 
   7   5   0    0.50    3.40 
   7   5   0   -3.60    3.60 
   7   5   0    3.30    3.50 
   8  -6   0    4.40    3.60 
  -8   6   0    1.20    3.60 
   7  -6   0   -4.60    2.40 
  -7   6   0   -2.80    1.70 
   6  -6   0   -0.10    2.60 
   6  -6   0    0.90    2.90 
   6  -6   0    2.10    4.00 
  -6   6   0    0.80    2.30 
  -6   6   0    0.70    2.20 
   5  -6   0   -4.30    2.50 
   5  -6   0    0.10    2.90 
   5  -6   0    2.90    2.70 
  -5   6   0   -1.50    2.00 
  -5   6   0   -2.70    1.80 
   4  -6   0   -0.50    2.20 
   4  -6   0    0.10    2.60 
  -4   6   0    0.70    2.10 
  -4   6   0    2.00    2.90 
  -4   6   0    3.00    2.40 
   3  -6   0    2.40    2.90 
   3  -6   0    3.70    3.10 
  -3   6   0    3.30    2.20 
  -3   6   0    1.80    2.70 
  -3   6   0   -0.40    2.10 
   2  -6   0   12.50    4.10 
   2  -6   0   11.70    5.80 
  -2   6   0   10.90    2.90 
  -2   6   0   15.20    3.50 
  -2   6   0   10.60    4.00 
  -2   6   0   16.60    3.60 
   1  -6   0   18.00    4.40 
   1  -6   0   14.60    4.70 
   1  -6   0   19.70    3.30 
   1  -6   0   19.90    4.40 
  -1   6   0   19.50    4.20 
  -1   6   0   15.20    3.00 
  -1   6   0   20.00    3.70 
  -1   6   0   16.70    4.40 
  -1   6   0   18.20    3.90 
   0  -6   0  172.98   12.00 
   0  -6   0  180.88   12.50 
   0  -6   0  175.38    8.90 
   0  -6   0  176.98   11.00 
   0   6   0  192.08   11.30 
   0   6   0  161.58   11.00 
   0   6   0  180.08   12.70 
   0   6   0  159.28    8.70 
   0   6   0  173.38    9.40 
  -1  -6   0   15.10    4.10 
  -1  -6   0   15.60    2.40 
  -1  -6   0   18.50    4.30 
  -1  -6   0   12.50    4.10 
   1   6   0   14.30    3.30 
   1   6   0   18.60    3.00 
   1   6   0    9.70    2.70 
   1   6   0   19.90    4.80 
  -2  -6   0    3.20    2.20 
  -2  -6   0    6.40    3.20 
   2   6   0    0.80    1.90 
   2   6   0    5.60    3.30 
  -3  -6   0    4.70    2.80 
  -3  -6   0    3.10    2.80 
   3   6   0    4.60    3.20 
   3   6   0    0.50    3.10 
  -4  -6   0   -1.80    2.50 
  -4  -6   0    0.10    2.10 
   4   6   0   -0.50    3.20 
   4   6   0   -2.00    2.70 
  -5  -6   0    7.80    3.20 
   5   6   0    6.30    4.40 
   5   6   0    0.90    3.70 
  -6  -6   0    6.30    2.90 
   6   6   0    1.60    3.50 
   6   6   0    3.30    4.20 
  -7  -6   0    1.60    4.30 
  -7  -6   0    1.70    3.20 
   7   6   0    8.10    5.60 
  -8  -6   0    1.90    4.40 
   8   6   0    3.50    5.90 
   8  -7   0   -2.80    4.10 
  -8   7   0    2.40    3.90 
   7  -7   0    2.30    7.70 
   7  -7   0    3.40    3.60 
  -7   7   0   -2.30    3.10 
  -7   7   0    1.50    2.80 
   6  -7   0   16.50    5.00 
   6  -7   0   19.10    7.10 
   6  -7   0   17.20    4.80 
  -6   7   0   20.10    5.00 
  -6   7   0   12.30    3.80 
   5  -7   0    7.10    4.10 
   5  -7   0   -0.40    3.90 
  -5   7   0   -5.20    2.60 
  -5   7   0   -0.90    2.30 
  -5   7   0   -1.50    2.30 
   4  -7   0   22.80    4.80 
   4  -7   0   23.70    6.30 
   4  -7   0   30.70    6.50 
  -4   7   0   23.40    4.80 
  -4   7   0   21.80    4.70 
   3  -7   0    7.00    4.80 
   3  -7   0    0.70    2.80 
   3  -7   0    3.30    2.30 
  -3   7   0    2.30    3.10 
  -3   7   0    0.00    2.50 
  -3   7   0    0.90    2.30 
   2  -7   0    9.00    4.30 
   2  -7   0    4.60    2.60 
  -2   7   0    4.70    3.80 
  -2   7   0   -0.40    2.90 
  -2   7   0    0.80    1.80 
   1  -7   0   -1.80    2.20 
   1  -7   0    9.10    3.70 
  -1   7   0   -1.10    2.50 
  -1   7   0   -1.10    2.00 
  -1   7   0   -1.40    2.70 
  -1   7   0    0.50    2.00 
  -1   7   0   -4.50    2.40 
   0  -7   0    1.50    3.00 
   0  -7   0   -1.30    3.10 
   0  -7   0    2.70    2.40 
   0   7   0    3.30    2.30 
   0   7   0    3.00    2.30 
   0   7   0   -2.10    2.80 
   0   7   0    2.20    3.30 
  -1  -7   0   -0.10    2.30 
  -1  -7   0    2.30    2.30 
  -1  -7   0    0.80    1.40 
   1   7   0    3.70    2.70 
   1   7   0    2.60    4.30 
   1   7   0   -2.40    1.90 
   1   7   0    5.60    3.10 
   1   7   0    4.20    2.60 
  -2  -7   0    2.90    2.40 
  -2  -7   0    7.30    3.40 
   2   7   0    1.50    3.10 
  -3  -7   0    6.30    3.50 
  -3  -7   0    6.10    3.60 
   3   7   0    3.90    4.20 
  -4  -7   0    5.70    3.80 
  -4  -7   0   12.70    4.30 
   4   7   0   12.70    5.50 
  -5  -7   0   13.70    3.80 
  -5  -7   0   11.40    4.10 
   5   7   0   13.80    5.30 
  -6  -7   0    9.00    3.50 
  -6  -7   0    4.00    4.10 
   6   7   0    8.70    4.70 
  -7  -7   0   -0.50    3.20 
   7   7   0    6.40    5.60 
   7  -8   0   -2.70    3.90 
  -7   8   0   -1.50    2.90 
   6  -8   0   -0.90    6.80 
   6  -8   0    4.10    3.80 
  -6   8   0    3.30    2.60 
  -6   8   0    2.40    3.30 
   5  -8   0    3.20    4.20 
   5  -8   0    8.10    4.50 
  -5   8   0    8.30    3.90 
  -5   8   0    8.40    3.90 
  -5   8   0    6.40    3.60 
   4  -8   0   11.60    5.60 
   4  -8   0    5.70    4.30 
  -4   8   0   12.80    4.50 
  -4   8   0   16.60    4.60 
  -4   8   0    8.90    4.10 
   3  -8   0   -1.50    5.60 
   3  -8   0   -0.80    3.90 
   3  -8   0   -1.70    3.00 
  -3   8   0   -4.10    2.60 
  -3   8   0    0.10    2.30 
  -3   8   0    3.30    2.90 
   2  -8   0   27.50    6.30 
   2  -8   0   23.10    5.80 
  -2   8   0   17.00    5.30 
  -2   8   0   21.30    5.10 
  -2   8   0   20.30    4.40 
   1  -8   0    5.60    2.80 
   1  -8   0    1.70    4.70 
   1  -8   0    2.90    2.80 
  -1   8   0    1.70    2.40 
  -1   8   0    2.20    3.30 
  -1   8   0   -2.10    2.20 
   0  -8   0    2.90    2.30 
   0  -8   0   -0.10    3.40 
   0   8   0    2.00    2.30 
   0   8   0   -2.30    2.20 
   0   8   0    1.30    2.40 
   0   8   0    3.30    3.80 
  -1  -8   0    1.40    3.10 
  -1  -8   0   -0.10    2.80 
  -1  -8   0    4.80    1.70 
   1   8   0    4.70    3.20 
   1   8   0   10.70    4.70 
   1   8   0   -3.90    2.30 
   1   8   0    2.20    3.30 
  -2  -8   0   -2.90    3.30 
  -2  -8   0    5.90    3.80 
   2   8   0    6.60    3.90 
   2   8   0   -0.70    3.60 
  -3  -8   0   11.60    4.60 
  -3  -8   0    9.10    4.10 
   3   8   0   13.80    5.80 
   3   8   0   18.90    6.30 
  -4  -8   0    5.80    3.70 
  -4  -8   0    6.20    3.80 
   4   8   0    5.00    5.10 
   4   8   0    0.70    5.90 
  -5  -8   0    7.60    3.80 
   5   8   0   -9.00    6.90 
   5   8   0    8.30    5.60 
  -6  -8   0   -1.30    3.40 
   6   8   0    8.60    5.50 
   6  -9   0    2.10    4.20 
  -6   9   0   -3.70    2.90 
   5  -9   0    1.20    4.50 
  -5   9   0   -1.50    2.20 
   4  -9   0    8.60    5.30 
   4  -9   0    5.70    4.60 
   4  -9   0   -7.20    5.70 
  -4   9   0    4.30    3.50 
  -4   9   0    5.90    5.10 
  -4   9   0   -0.20    4.00 
   3  -9   0    3.50    5.00 
   3  -9   0    0.70    4.70 
   3  -9   0    5.20    4.70 
  -3   9   0   -2.30    3.30 
  -3   9   0   -3.20    2.60 
  -3   9   0   -3.20    2.60 
   2  -9   0    0.80    3.10 
   2  -9   0    2.10    4.20 
   2  -9   0    3.80    3.40 
  -2   9   0   -0.70    2.40 
  -2   9   0   -0.20    3.00 
  -2   9   0   -6.30    2.90 
   1  -9   0    5.40    4.00 
   1  -9   0   14.30    5.00 
  -1   9   0    6.20    3.20 
  -1   9   0   11.60    5.20 
  -1   9   0    7.80    4.40 
   0  -9   0    5.50    4.30 
   0  -9   0    2.60    3.90 
   0   9   0    9.60    5.10 
   0   9   0    2.30    3.10 
  -1  -9   0   -0.50    2.90 
  -1  -9   0    0.20    2.60 
   1   9   0    6.00    5.00 
  -2  -9   0    6.20    4.70 
  -2  -9   0   -2.10    3.10 
   2   9   0   -2.00    4.20 
   2   9   0   14.40    5.10 
  -3  -9   0    4.50    3.80 
  -3  -9   0   -1.30    3.90 
   3   9   0    4.00    5.70 
   3   9   0    3.10    5.80 
  -4  -9   0    2.10    3.30 
   4   9   0    0.80    5.00 
   4   9   0   -9.30    7.70 
  -5  -9   0    0.30    3.90 
   5   9   0   -2.30    5.10 
  -6  -9   0    3.70    4.90 
   6   9   0    9.70    7.80 
   5 -10   0    2.30    4.60 
   4 -10   0    4.30    4.00 
  -4  10   0   -0.30    3.20 
   3 -10   0    0.70    4.20 
   3 -10   0    3.20    4.40 
  -3  10   0    0.90    3.30 
   2 -10   0   -1.60    4.30 
   2 -10   0   -0.30    4.10 
  -2  10   0    1.20    5.40 
  -2  10   0    0.10    5.00 
   1 -10   0   -4.90    3.40 
   1 -10   0    2.20    3.90 
  -1  10   0   -1.90    3.20 
  -1  10   0    6.70    3.80 
   0 -10   0    4.30    4.80 
   0 -10   0    0.90    4.60 
   0  10   0    7.20    3.80 
   0  10   0    5.40    5.00 
  -1 -10   0   -7.30    3.90 
  -1 -10   0    0.70    4.80 
  -1 -10   0   -1.50    3.70 
   1  10   0    0.30    4.90 
   1  10   0    2.80    4.00 
  -2 -10   0   -2.00    3.90 
  -2 -10   0    3.50    5.00 
   2  10   0    2.60    6.90 
   2  10   0   -3.90    5.50 
  -3 -10   0   -2.10    3.40 
   3  10   0   -0.60    5.10 
  -4 -10   0    9.00    5.40 
   4  10   0   -4.40    5.90 
   3 -11   0   -6.90    4.10 
  -3  11   0    2.20    3.00 
   2 -11   0   -9.90    6.10 
   2 -11   0   -0.10    5.00 
  -2  11   0   -3.60    3.60 
   1 -11   0    3.00    4.70 
   1 -11   0    0.70    5.20 
  -1  11   0   -0.20    3.90 
  -1  11   0    8.30    7.00 
   0 -11   0    7.50    5.50 
   0 -11   0    2.60    5.30 
   0  11   0    7.50    5.10 
   0  11   0    3.90    6.50 
  -1 -11   0    3.10    6.20 
   1  11   0    6.70    4.20 
   1  11   0   -4.40    5.40 
  -2 -11   0    2.70    4.70 
   2  11   0    1.50    6.10 
  -3 -11   0    1.20    5.80 
   3  11   0   -7.40    4.80 
  -3 -11   1   11.00    6.40 
   2  11  -1   -8.20    6.20 
  -2 -11   1    8.30    5.80 
   1  11  -1    2.50    4.50 
   1  11  -1    5.40    6.60 
  -1 -11   1    8.60    7.80 
  -1 -11   1    1.90    6.20 
   0  11  -1    0.90    5.50 
   0  11  -1    3.00    5.20 
   0 -11   1    1.10    5.30 
   0 -11   1   -2.70    5.20 
  -1  11  -1    0.50    4.80 
   1 -11   1    0.40    5.40 
   1 -11   1    0.30    4.80 
  -2  11  -1   -5.00    3.40 
   2 -11   1    7.70    5.60 
   2 -11   1   -1.90    6.10 
  -3  11  -1   -0.10    2.90 
   3 -11   1   -2.10    4.70 
   4  10  -1   -0.60    5.30 
  -4 -10   1    6.80    5.90 
   3  10  -1    6.80    6.10 
  -3 -10   1   -2.00    4.70 
   2  10  -1    2.20    5.20 
  -2 -10   1    5.20    4.80 
  -2 -10   1    4.10    4.80 
   1  10  -1    2.00    4.00 
   1  10  -1    0.40    4.50 
  -1 -10   1    0.70    4.30 
  -1 -10   1   -0.50    4.80 
   0  10  -1    5.50    4.30 
   0  10  -1   -1.90    4.50 
   0 -10   1   -6.60    4.20 
  -1  10  -1    4.70    3.20 
  -1  10  -1    7.60    4.10 
  -1  10  -1   -2.60    5.20 
   1 -10   1    4.40    4.70 
   1 -10   1   -1.20    3.60 
  -2  10  -1   -0.30    3.30 
  -2  10  -1   -4.60    3.60 
   2 -10   1    2.90    5.00 
   2 -10   1    3.60    4.70 
  -3  10  -1   -1.60    3.10 
   3 -10   1    4.40    5.10 
   3 -10   1  -12.80    6.80 
   3 -10   1    3.30    5.10 
  -4  10  -1    5.10    3.50 
   4 -10   1    2.60    4.90 
   6   9  -1    6.30    7.30 
  -6  -9   1   11.80    5.80 
   5   9  -1    1.60    7.20 
  -5  -9   1   -1.00    3.20 
   4   9  -1    7.60    7.20 
   4   9  -1    8.30    9.50 
  -4  -9   1   12.60    4.90 
   3   9  -1    8.90    6.20 
   3   9  -1   21.10    6.40 
  -3  -9   1    4.40    4.80 
  -3  -9   1   12.30    6.00 
   2   9  -1   -1.20    3.90 
   2   9  -1    7.70    5.30 
  -2  -9   1    0.80    3.80 
  -2  -9   1   -0.90    2.00 
  -2  -9   1    3.80    4.40 
   1   9  -1   13.00    6.10 
   1   9  -1   14.60    4.40 
   1   9  -1   11.70    4.20 
  -1  -9   1    7.40    4.40 
  -1  -9   1   10.00    3.90 
  -1  -9   1    6.80    2.70 
   0   9  -1    8.70    5.00 
   0   9  -1    3.30    3.20 
   0   9  -1    3.00    2.80 
   0  -9   1    1.90    4.40 
   0  -9   1    9.50    4.10 
  -1   9  -1   11.70    3.80 
  -1   9  -1    7.40    4.50 
  -1   9  -1   16.30    3.80 
   1  -9   1   10.90    4.70 
   1  -9   1    8.40    4.20 
  -2   9  -1    4.60    4.70 
  -2   9  -1   -2.80    2.70 
  -2   9  -1    4.20    3.10 
   2  -9   1    3.50    5.40 
   2  -9   1    0.10    3.20 
   2  -9   1    2.90    3.40 
  -3   9  -1   -0.10    3.20 
  -3   9  -1    3.50    3.10 
  -3   9  -1   -2.70    3.00 
   3  -9   1    8.60    4.90 
   3  -9   1   -5.00    3.60 
  -4   9  -1   13.70    6.00 
  -4   9  -1   11.10    4.60 
  -4   9  -1    0.80    3.50 
   4  -9   1   17.20    6.70 
   4  -9   1    7.80    7.80 
   4  -9   1    8.40    5.10 
  -5   9  -1    1.40    2.80 
   5  -9   1   -0.30    4.80 
  -6   9  -1   -0.20    3.20 
   6  -9   1   15.10    6.30 
   6   8  -1    4.60    5.10 
  -6  -8   1    0.20    4.00 
   5   8  -1    4.00    4.50 
  -5  -8   1    0.60    3.00 
   4   8  -1    5.30    5.30 
  -4  -8   1    4.50    3.90 
  -4  -8   1    9.80    5.30 
   3   8  -1    6.20    4.60 
  -3  -8   1   -3.50    3.10 
  -3  -8   1   -1.00    3.40 
   2   8  -1   19.10    3.50 
   2   8  -1   13.80    5.90 
   2   8  -1   14.90    4.90 
  -2  -8   1   18.60    5.50 
  -2  -8   1   18.00    5.30 
   1   8  -1   13.10    5.10 
   1   8  -1   12.60    3.90 
   1   8  -1   10.70    3.50 
   1   8  -1    9.90    4.30 
  -1  -8   1    8.50    2.70 
  -1  -8   1    7.90    3.90 
  -1  -8   1   12.90    5.00 
   0   8  -1    5.80    2.90 
   0   8  -1   -1.80    3.10 
   0   8  -1    8.10    4.50 
   0   8  -1   -0.90    2.30 
   0  -8   1    7.20    2.30 
   0  -8   1    5.90    3.20 
   0  -8   1    2.90    3.50 
   0  -8   1   -4.70    3.80 
  -1   8  -1    4.40    3.80 
  -1   8  -1    5.00    3.70 
  -1   8  -1   13.90    3.50 
   1  -8   1   11.30    4.70 
   1  -8   1   13.30    4.10 
   1  -8   1    8.20    7.10 
  -2   8  -1   25.50    5.60 
  -2   8  -1   27.30    5.00 
  -2   8  -1   21.20    6.20 
   2  -8   1   26.40    6.30 
   2  -8   1   29.40    6.60 
   2  -8   1   23.10    5.90 
  -3   8  -1    2.70    3.00 
  -3   8  -1   -2.80    3.40 
   3  -8   1   -0.60    3.00 
   3  -8   1    2.40    4.60 
  -4   8  -1   10.20    4.70 
  -4   8  -1    3.20    2.90 
  -4   8  -1    3.40    3.20 
   4  -8   1    5.20    4.70 
   4  -8   1    3.40    3.90 
  -5   8  -1    1.10    2.60 
  -5   8  -1   -0.40    3.30 
  -5   8  -1   -5.80    2.80 
   5  -8   1   -8.00    4.70 
   5  -8   1   -2.60    3.30 
   5  -8   1   -2.70    3.60 
  -6   8  -1   -0.70    1.90 
  -6   8  -1   -4.20    2.60 
   6  -8   1   -4.60    5.30 
   6  -8   1    2.30    3.90 
  -7   8  -1   -1.10    1.90 
   7  -8   1   -1.10    3.20 
   7   7  -1    2.50    4.50 
  -7  -7   1    1.70    3.80 
   6   7  -1   12.30    5.00 
  -6  -7   1    9.60    3.50 
   5   7  -1    7.20    5.10 
  -5  -7   1    3.70    3.10 
  -5  -7   1    1.80    3.00 
   4   7  -1    3.20    3.60 
  -4  -7   1    1.80    3.10 
  -4  -7   1    2.10    2.80 
   3   7  -1   -3.00    3.10 
  -3  -7   1    0.80    2.30 
   2   7  -1    0.10    2.00 
   2   7  -1    0.00    3.20 
  -2  -7   1   -0.70    1.70 
  -2  -7   1   -0.30    2.50 
  -2  -7   1    4.80    2.90 
   1   7  -1    1.80    2.70 
   1   7  -1    2.40    2.90 
   1   7  -1   -2.30    2.20 
   1   7  -1    2.60    2.60 
  -1  -7   1    2.50    2.70 
  -1  -7   1    4.50    1.60 
  -1  -7   1    5.70    3.30 
   0   7  -1    5.00    2.90 
   0   7  -1    1.50    3.50 
   0   7  -1   10.20    2.70 
   0   7  -1    3.80    3.20 
   0   7  -1    2.60    2.40 
   0  -7   1    9.30    5.10 
   0  -7   1    1.70    1.90 
   0  -7   1    1.90    2.90 
   0  -7   1    5.50    3.10 
  -1   7  -1    4.10    3.60 
  -1   7  -1    9.70    3.40 
  -1   7  -1   13.30    4.00 
  -1   7  -1   11.90    3.10 
   1  -7   1    2.50    2.50 
   1  -7   1   10.10    5.20 
   1  -7   1    7.80    2.40 
   1  -7   1   15.70    4.40 
  -2   7  -1    5.40    4.80 
  -2   7  -1    6.90    2.80 
   2  -7   1    7.90    4.20 
   2  -7   1    9.50    4.40 
   2  -7   1    9.30    3.60 
  -3   7  -1   -1.30    1.90 
  -3   7  -1    2.10    2.70 
  -3   7  -1    0.50    2.60 
   3  -7   1   -1.10    2.60 
   3  -7   1    2.10    3.70 
   3  -7   1    1.10    2.30 
  -4   7  -1    7.30    3.10 
  -4   7  -1    4.00    2.50 
   4  -7   1   -1.70    3.90 
   4  -7   1    0.60    2.70 
   4  -7   1    5.10    3.50 
  -5   7  -1    4.20    3.20 
  -5   7  -1    1.80    2.50 
   5  -7   1    4.20    4.10 
   5  -7   1    6.00    4.40 
   5  -7   1    4.60    3.00 
  -6   7  -1    4.40    3.10 
  -6   7  -1    5.60    3.00 
   6  -7   1    2.30    3.70 
   6  -7   1   -0.10    4.80 
   6  -7   1    0.40    3.90 
  -7   7  -1    2.00    3.00 
  -7   7  -1   -5.40    2.60 
   7  -7   1    7.70    5.30 
   7  -7   1   -0.20    3.80 
  -8   7  -1   -2.80    3.50 
  -8  -6   1    5.80    5.10 
   7   6  -1    2.10    4.40 
   7   6  -1    9.60    5.90 
  -7  -6   1    9.20    4.50 
  -7  -6   1    8.40    3.80 
   6   6  -1   10.00    4.90 
   6   6  -1    7.00    5.10 
  -6  -6   1   11.00    3.70 
   5   6  -1   -0.40    3.20 
   5   6  -1    5.30    3.90 
  -5  -6   1    5.30    3.10 
   4   6  -1    2.60    2.80 
   4   6  -1    2.10    3.20 
  -4  -6   1   -0.80    2.00 
   3   6  -1   13.80    5.00 
   3   6  -1   19.50    5.30 
  -3  -6   1   23.10    4.90 
  -3  -6   1   18.30    4.80 
   2   6  -1   -1.80    2.60 
   2   6  -1   -1.20    2.30 
   2   6  -1   -0.30    1.60 
  -2  -6   1    8.90    3.00 
  -2  -6   1    1.10    2.60 
   1   6  -1    6.70    2.50 
   1   6  -1    4.60    3.40 
   1   6  -1    3.30    2.40 
  -1  -6   1    2.70    1.80 
  -1  -6   1    1.20    2.40 
  -1  -6   1   -0.30    2.10 
  -1  -6   1    2.10    2.60 
   0   6  -1    4.90    2.40 
   0   6  -1   11.10    2.60 
   0   6  -1    0.90    1.80 
   0   6  -1    4.60    3.40 
   0   6  -1    3.10    2.70 
   0  -6   1    4.70    2.80 
   0  -6   1    2.10    2.30 
   0  -6   1   -2.10    2.20 
  -1   6  -1   12.60    3.50 
  -1   6  -1   17.80    4.50 
  -1   6  -1   11.10    2.90 
  -1   6  -1    5.90    2.70 
  -1   6  -1   10.30    2.60 
   1  -6   1    9.40    4.00 
   1  -6   1   12.80    3.50 
   1  -6   1   10.30    3.60 
   1  -6   1    9.90    2.50 
  -2   6  -1    6.10    2.70 
  -2   6  -1    7.30    2.50 
  -2   6  -1    5.10    3.10 
  -2   6  -1    2.90    2.40 
   2  -6   1    3.90    2.90 
   2  -6   1    2.60    2.90 
   2  -6   1    4.70    2.30 
  -3   6  -1   10.20    3.10 
  -3   6  -1    8.90    3.20 
  -3   6  -1    9.20    3.50 
   3  -6   1    6.70    3.40 
   3  -6   1    4.60    3.10 
  -4   6  -1   29.80    5.20 
  -4   6  -1   21.60    4.20 
  -4   6  -1   36.30    5.40 
   4  -6   1   36.00    5.30 
   4  -6   1   31.50    6.10 
  -5   6  -1    8.30    3.20 
  -5   6  -1    2.60    2.70 
   5  -6   1    5.60    3.70 
   5  -6   1    8.10    3.70 
   5  -6   1    8.40    3.50 
  -6   6  -1    5.60    3.60 
  -6   6  -1    4.90    2.70 
   6  -6   1   10.30    3.60 
   6  -6   1   -0.80    4.10 
   6  -6   1    5.70    3.60 
  -7   6  -1   -1.90    2.90 
   7  -6   1   -0.70    2.40 
   7  -6   1   -4.80    4.20 
  -8   6  -1   13.50    5.20 
   8  -6   1   26.30    6.50 
   8  -6   1    0.10    7.00 
   8   5  -1    2.50    5.10 
  -8  -5   1   -2.30    3.10 
   7   5  -1   -0.70    4.10 
   7   5  -1    1.10    3.40 
   7   5  -1    1.00    3.60 
  -7  -5   1    1.70    3.60 
   6   5  -1   -3.30    2.70 
   6   5  -1    4.10    3.00 
   5   5  -1    0.60    3.30 
   5   5  -1   -0.50    4.20 
  -5  -5   1    4.20    2.40 
   4   5  -1    1.30    2.70 
   4   5  -1   -0.80    2.60 
  -4  -5   1    3.20    2.40 
  -4  -5   1    4.90    2.60 
   3   5  -1    5.80    2.90 
   3   5  -1    2.60    2.60 
  -3  -5   1    2.00    2.10 
  -3  -5   1    4.00    2.50 
   2   5  -1   27.50    5.00 
   2   5  -1   25.40    5.10 
   2   5  -1   26.40    2.80 
  -2  -5   1   21.20    2.50 
  -2  -5   1   24.60    4.60 
  -2  -5   1   39.00    4.70 
  -2  -5   1   26.90    4.50 
   1   5  -1   11.60    2.90 
   1   5  -1   15.80    3.70 
   1   5  -1   20.40    3.00 
   1   5  -1   12.60    3.60 
  -1  -5   1   10.80    2.00 
  -1  -5   1   11.30    3.20 
  -1  -5   1    9.70    2.80 
  -1  -5   1   10.20    2.90 
   0   5  -1   32.10    5.30 
   0   5  -1   30.50    4.40 
   0  -5   1   31.60    3.40 
   0  -5   1   40.10    5.20 
   0  -5   1   40.00    5.60 
   0  -5   1   30.90    4.40 
  -1   5  -1   79.49    5.90 
  -1   5  -1   71.59    6.20 
  -1   5  -1   72.89    7.10 
  -1   5  -1   76.39    5.40 
  -1   5  -1   71.99    6.30 
   1  -5   1   83.89    7.20 
   1  -5   1   77.79    6.40 
   1  -5   1   77.69    7.40 
   1  -5   1   82.29    5.70 
  -2   5  -1    2.10    1.80 
  -2   5  -1   -1.30    1.10 
  -2   5  -1    1.00    1.80 
  -2   5  -1    0.50    1.70 
   2  -5   1    0.00    2.00 
   2  -5   1    2.30    1.70 
   2  -5   1    0.50    1.90 
  -3   5  -1    1.20    2.20 
  -3   5  -1    3.60    2.30 
  -3   5  -1    7.70    2.50 
  -3   5  -1    2.50    2.20 
   3  -5   1    5.20    2.10 
   3  -5   1   -0.80    1.40 
   3  -5   1    2.40    2.10 
  -4   5  -1    9.10    2.50 
  -4   5  -1   11.80    3.10 
  -4   5  -1   10.30    3.20 
   4  -5   1    6.90    2.60 
   4  -5   1    9.30    3.60 
   4  -5   1    8.00    3.30 
  -5   5  -1    6.90    2.50 
  -5   5  -1    4.70    2.70 
   5  -5   1   12.20    3.00 
   5  -5   1    7.80    3.20 
   5  -5   1    9.60    3.30 
  -6   5  -1    4.00    2.60 
  -6   5  -1    1.70    2.20 
   6  -5   1   -1.00    2.50 
   6  -5   1    2.70    3.10 
  -7   5  -1    7.60    3.70 
   7  -5   1    3.60    4.00 
   7  -5   1    2.30    2.80 
  -8   5  -1    2.00    3.20 
   8  -5   1   -7.90    4.50 
   8  -5   1    5.30    3.60 
  -9  -4   1    2.90    4.60 
   8   4  -1    3.80    4.00 
   8   4  -1   -4.00    3.70 
   8   4  -1    4.20    4.10 
  -8  -4   1   10.70    2.90 
   7   4  -1    1.60    2.90 
   7   4  -1   -1.10    3.20 
   7   4  -1    3.20    3.10 
  -7  -4   1   -0.90    1.90 
  -7  -4   1   -2.70    2.20 
   6   4  -1    4.50    2.90 
   6   4  -1    6.80    3.00 
  -6  -4   1    4.60    2.20 
   5   4  -1    8.30    3.70 
   5   4  -1    8.70    3.00 
   5   4  -1    4.20    3.00 
  -5  -4   1   15.00    2.50 
  -5  -4   1    8.90    2.60 
   4   4  -1   43.10    5.90 
   4   4  -1   45.80    4.20 
   4   4  -1   40.40    5.30 
  -4  -4   1   45.00    4.70 
  -4  -4   1   39.70    3.50 
   3   4  -1    0.30    1.30 
   3   4  -1    2.40    1.60 
   3   4  -1   -1.00    1.90 
  -3  -4   1    4.70    1.90 
  -3  -4   1    1.10    1.60 
  -3  -4   1    4.20    2.00 
   2   4  -1 1106.29   38.10 
   2   4  -1 1069.89   38.60 
   2   4  -1 1116.39   39.70 
   2   4  -1 1099.09   34.60 
  -2  -4   1 1134.69   38.20 
  -2  -4   1 1098.49   38.60 
  -2  -4   1 1088.89   39.10 
   1   4  -1   15.00    3.30 
   1   4  -1   19.00    2.40 
   1   4  -1   14.00    3.00 
   1   4  -1   16.50    3.70 
  -1  -4   1   10.60    3.90 
  -1  -4   1   14.30    3.00 
  -1  -4   1   14.60    3.20 
   0   4  -1   34.90    4.00 
   0   4  -1   36.30    3.00 
   0   4  -1   30.50    4.30 
   0  -4   1   30.80    2.80 
   0  -4   1   33.30    4.50 
   0  -4   1   29.50    3.70 
   0  -4   1   25.40    3.80 
  -1   4  -1    0.40    1.50 
  -1   4  -1    1.00    1.00 
  -1   4  -1    0.90    1.40 
  -1   4  -1   -1.60    1.10 
  -1   4  -1    0.80    1.50 
   1  -4   1    2.40    1.10 
   1  -4   1    1.00    1.40 
   1  -4   1    3.90    2.20 
   1  -4   1   -1.00    1.30 
  -2   4  -1 1190.68   41.10 
  -2   4  -1 1240.98   41.10 
  -2   4  -1 1248.58   42.10 
  -2   4  -1 1199.48   40.80 
  -2   4  -1 1195.08   41.80 
   2  -4   1 1247.18   41.90 
   2  -4   1 1212.18   41.30 
   2  -4   1 1194.38   42.60 
  -3   4  -1    6.70    2.30 
  -3   4  -1    6.70    2.60 
  -3   4  -1    7.80    2.60 
  -3   4  -1    4.50    1.70 
  -3   4  -1    6.10    2.10 
   3  -4   1    5.00    2.10 
   3  -4   1    6.20    2.50 
   3  -4   1    6.00    2.40 
  -4   4  -1   -2.50    1.30 
  -4   4  -1    1.40    1.70 
   4  -4   1   -0.30    2.00 
   4  -4   1    1.10    1.80 
  -5   4  -1   12.30    3.80 
   5  -4   1    9.80    2.50 
   5  -4   1   10.40    3.50 
  -6   4  -1   11.20    4.00 
   6  -4   1   13.10    3.70 
  -7   4  -1    2.70    2.70 
   7  -4   1    7.30    4.80 
   7  -4   1    3.30    2.50 
  -8   4  -1    0.30    2.50 
   8  -4   1   -0.30    2.80 
  -9   4  -1   -2.30    3.50 
   8   3  -1   -3.00    3.40 
  -8  -3   1    2.30    2.70 
   7   3  -1    7.70    3.50 
  -7  -3   1    8.10    3.20 
  -7  -3   1    2.30    2.40 
   6   3  -1    7.60    3.20 
   6   3  -1    4.50    2.90 
  -6  -3   1    1.80    2.30 
   5   3  -1    1.90    2.20 
   5   3  -1    3.30    2.50 
   5   3  -1    4.20    2.50 
  -5  -3   1    2.80    1.80 
  -5  -3   1    3.60    1.60 
   4   3  -1  133.99    7.40 
   4   3  -1  150.78    8.00 
   4   3  -1  152.58    8.80 
   4   3  -1  144.19    9.00 
  -4  -3   1  149.09    7.20 
  -4  -3   1  140.09    7.90 
   3   3  -1    2.70    1.70 
   3   3  -1    2.90    1.40 
   3   3  -1    2.30    1.40 
   3   3  -1    1.80    1.90 
  -3  -3   1    0.60    1.50 
  -3  -3   1    1.00    1.90 
  -3  -3   1    3.40    1.60 
  -3  -3   1    3.20    1.50 
   2   3  -1  308.07   12.80 
   2   3  -1  307.47   10.90 
   2   3  -1  304.37   13.80 
  -2  -3   1  311.47   13.20 
  -2  -3   1  312.27   10.70 
  -2  -3   1  323.67   13.00 
  -2  -3   1  302.07   13.30 
   1   3  -1   13.20    2.90 
   1   3  -1   14.50    2.50 
   1   3  -1   18.90    2.90 
  -1  -3   1   14.20    2.30 
  -1  -3   1   12.40    2.50 
  -1  -3   1    8.90    2.40 
   0   3  -1   66.19    4.70 
   0   3  -1   70.19    3.70 
   0   3  -1   66.39    4.90 
   0   3  -1   57.49    5.00 
   0  -3   1   56.79    3.60 
   0  -3   1   57.89    4.70 
   0  -3   1   60.59    4.50 
   0  -3   1   57.39    5.10 
  -1   3  -1   20.70    2.90 
  -1   3  -1   24.90    2.90 
  -1   3  -1   27.80    3.50 
  -1   3  -1   24.80    2.60 
  -1   3  -1   25.60    3.00 
   1  -3   1   23.60    2.60 
   1  -3   1   23.90    2.90 
   1  -3   1   21.30    3.00 
   1  -3   1   20.90    3.30 
  -2   3  -1   75.79    4.90 
  -2   3  -1   72.79    5.30 
  -2   3  -1   82.09    5.20 
  -2   3  -1   81.19    5.40 
  -2   3  -1   75.29    5.60 
   2  -3   1   86.19    5.20 
   2  -3   1   85.39    5.60 
  -3   3  -1    4.40    1.60 
  -3   3  -1    3.60    1.90 
  -3   3  -1    6.40    2.10 
   3  -3   1    3.10    1.40 
   3  -3   1    3.60    1.60 
   3  -3   1    3.90    1.90 
  -4   3  -1  143.49   10.00 
  -4   3  -1  147.99    9.60 
  -4   3  -1  156.28    7.70 
   4  -3   1  157.68    8.30 
   4  -3   1  156.58   10.40 
   4  -3   1  153.98    8.70 
   4  -3   1  155.58    7.60 
  -5   3  -1    9.70    3.00 
   5  -3   1    0.30    2.60 
  -6   3  -1   20.70    4.90 
  -7   3  -1    7.00    3.60 
  -8   3  -1   -1.30    2.60 
  -9   3  -1    0.90    4.60 
   9   2  -1   -1.80    5.10 
  -9  -2   1   -5.00    3.00 
   8   2  -1    3.20    3.40 
  -8  -2   1   -0.70    2.70 
   7   2  -1    1.50    3.00 
  -7  -2   1   -3.10    2.00 
   6   2  -1   20.20    4.80 
  -6  -2   1   12.80    2.90 
   5   2  -1   17.50    3.80 
  -5  -2   1   16.70    3.20 
   4   2  -1    6.40    2.40 
  -4  -2   1    3.70    2.00 
  -4  -2   1    6.00    1.90 
   3   2  -1    0.20    1.10 
   3   2  -1    2.70    1.40 
   3   2  -1    0.50    0.80 
   3   2  -1   -0.30    1.20 
  -3  -2   1    1.00    0.90 
  -3  -2   1   -1.20    0.90 
   2   2  -1  102.39    5.90 
   2   2  -1  103.19    5.70 
   2   2  -1  102.59    5.40 
   2   2  -1  109.09    4.90 
  -2  -2   1  102.09    5.60 
  -2  -2   1  111.19    4.60 
  -2  -2   1  111.29    5.60 
  -2  -2   1  102.99    5.40 
   1   2  -1   55.29    6.00 
   1   2  -1   70.09    4.80 
   1   2  -1   73.69    4.80 
  -1  -2   1   84.59    5.60 
  -1  -2   1   68.79    4.30 
  -1  -2   1   88.29    3.40 
  -1  -2   1   72.99    4.50 
   0   2  -1   -0.20    0.80 
   0   2  -1   -0.10    0.60 
   0   2  -1    0.50    1.20 
   0   2  -1   -0.10    1.00 
   0  -2   1   -0.20    0.90 
   0  -2   1   -0.80    0.70 
   0  -2   1   -0.30    0.50 
   0  -2   1   -0.60    1.10 
  -1   2  -1  126.69    6.90 
  -1   2  -1  138.29    6.70 
  -1   2  -1  135.19    6.30 
  -1   2  -1  140.79    6.30 
   1  -2   1  141.69    6.50 
  -2   2  -1    5.00    1.90 
  -2   2  -1    8.30    1.60 
  -2   2  -1    5.30    1.40 
  -2   2  -1    5.90    1.50 
  -2   2  -1    5.70    1.70 
   2  -2   1    4.50    1.40 
   2  -2   1    3.70    1.80 
   2  -2   1    0.90    1.40 
   2  -2   1    3.30    1.30 
  -3   2  -1   44.00    4.20 
  -3   2  -1   37.50    4.30 
  -3   2  -1   45.00    3.10 
   3  -2   1   48.20    4.70 
  -4   2  -1   78.99    9.50 
   4  -2   1   90.69    8.90 
  -5   2  -1   17.50    3.80 
   5  -2   1   18.00    4.40 
  -6   2  -1   30.90    5.50 
   6  -2   1   41.60    6.30 
  -7   2  -1    0.40    3.00 
  -8   2  -1    0.90    2.90 
  -9   2  -1   -0.30    3.10 
   9   1  -1   -0.30    4.80 
   8   1  -1   -1.70    3.70 
  -8  -1   1    1.90    2.70 
   7   1  -1    6.80    3.40 
  -7  -1   1    2.10    2.60 
   6   1  -1    4.30    3.10 
  -6  -1   1    6.80    2.70 
  -6  -1   1    4.00    2.30 
   5   1  -1   10.00    3.30 
  -5  -1   1   12.20    2.90 
   4   1  -1    3.10    2.10 
  -4  -1   1    6.00    2.20 
   3   1  -1    0.70    1.30 
  -3  -1   1    0.60    1.10 
   2   1  -1  434.96   15.20 
   2   1  -1  418.66   14.40 
  -2  -1   1  448.16   15.00 
  -2  -1   1  446.16   14.60 
   1   1  -1   46.30    2.20 
   1   1  -1   43.10    2.80 
   1   1  -1   44.00    2.50 
  -1  -1   1   42.40    2.70 
  -1  -1   1   48.20    2.20 
  -1  -1   1   41.20    2.50 
  -1  -1   1   46.00    2.70 
   0   1  -1    0.50    0.20 
   0   1  -1   -0.30    0.30 
   0  -1   1   -0.40    0.30 
  -1   1  -1   30.40    2.40 
  -1   1  -1   33.20    1.90 
  -1   1  -1   32.30    2.30 
  -1   1  -1   31.40    2.00 
  -1   1  -1   31.30    2.00 
   1  -1   1   29.60    1.90 
   1  -1   1   28.60    2.40 
   1  -1   1   31.90    2.30 
   1  -1   1   32.40    2.10 
   1  -1   1   30.70    2.00 
  -2   1  -1   36.60    3.70 
  -2   1  -1   42.80    3.50 
   2  -1   1   34.20    3.60 
  -3   1  -1   47.40    4.40 
  -3   1  -1   47.90    4.10 
   3  -1   1   43.10    4.20 
  -4   1  -1   60.79    5.30 
  -4   1  -1   62.39    5.50 
   4  -1   1   62.49    5.70 
  -5   1  -1    3.00    2.20 
  -5   1  -1    4.80    2.20 
   5  -1   1    3.70    2.90 
  -6   1  -1    0.00    1.70 
   6  -1   1   -0.40    2.50 
  -7   1  -1    1.30    2.20 
   7  -1   1    1.50    3.00 
  -8   1  -1    2.80    3.40 
  -9   1  -1   -3.60    2.80 
   9   0  -1   14.20    5.70 
  -9   0   1    4.70    4.70 
   7   0  -1   14.40    4.70 
  -7   0   1   14.70    4.20 
   6   0  -1    4.80    3.00 
  -6   0   1    3.30    2.30 
   5   0  -1   -1.60    2.30 
  -5   0   1   -2.40    1.80 
   4   0  -1    5.00    2.60 
  -4   0   1    3.50    2.00 
   3   0  -1   96.29    6.10 
  -3   0   1  101.69    6.00 
   2   0  -1 1870.41   58.49 
  -2   0   1 1873.21   58.39 
  -1   0   1   33.50    2.20 
  -1   0  -1   18.00    1.50 
   1   0   1   20.60    1.70 
  -2   0  -1  844.62   27.70 
   2   0   1  843.32   27.70 
  -3   0  -1   72.49    5.00 
   3   0   1   67.79    4.90 
  -4   0  -1   39.00    4.30 
  -4   0  -1   40.50    4.30 
   4   0   1   40.20    4.70 
  -5   0  -1    9.70    4.40 
   5   0   1    5.60    3.30 
  -6   0  -1    1.70    2.10 
   6   0   1    3.40    3.00 
  -7   0  -1   24.10    5.10 
   7   0   1   19.30    5.40 
  -8   0  -1   -1.30    2.90 
   8   0   1   -1.70    3.80 
  -9   0  -1    7.80    4.30 
  -9   1   1    2.70    4.10 
   8  -1  -1   -0.30    3.80 
  -8   1   1    3.70    3.40 
   7  -1  -1    4.10    2.90 
  -7   1   1    3.60    2.60 
   6  -1  -1    1.40    2.80 
  -6   1   1    7.00    3.00 
   5  -1  -1    5.80    3.30 
  -5   1   1    6.10    2.90 
   4  -1  -1  131.99    8.50 
  -4   1   1  122.39    8.10 
  -4   1   1  129.19    8.00 
   3  -1  -1   34.60    3.90 
  -3   1   1   36.00    3.80 
   1  -1  -1    0.20    0.60 
   1  -1  -1   -0.10    0.80 
   1  -1  -1    0.10    0.70 
   1  -1  -1    0.00    0.50 
   1  -1  -1    0.00    0.50 
  -1   1   1    0.20    0.60 
  -1   1   1   -0.40    0.70 
  -1   1   1    0.90    0.60 
  -1   1   1    1.30    1.00 
   0  -1  -1    0.90    0.30 
   0  -1  -1   -0.40    0.30 
   0   1   1   -0.30    0.20 
   0   1   1   -0.50    0.20 
   0   1   1    0.20    0.20 
  -1  -1  -1   19.30    1.60 
  -1  -1  -1   19.10    1.60 
  -1  -1  -1   16.30    1.80 
   1   1   1   17.30    1.90 
   1   1   1   13.00    1.30 
   1   1   1   19.00    1.60 
  -3  -1  -1   34.60    3.20 
   3   1   1   36.00    3.40 
  -4  -1  -1  596.34   22.40 
   4   1   1  616.04   22.70 
  -5  -1  -1   -2.60    1.60 
  -5  -1  -1   -0.30    1.50 
   5   1   1   -0.60    2.00 
  -6  -1  -1    2.80    2.40 
  -6  -1  -1   -4.30    1.80 
   6   1   1    0.30    2.40 
  -7  -1  -1   11.50    3.30 
   7   1   1   12.10    4.00 
  -8  -1  -1    2.20    2.90 
   8   1   1    4.50    3.50 
  -9  -1  -1    6.20    3.90 
  -9   2   1    0.70    3.50 
   8  -2  -1    6.70    4.20 
  -8   2   1    2.00    2.80 
   7  -2  -1   -1.00    2.90 
  -7   2   1    0.30    2.20 
   6  -2  -1    2.40    3.20 
  -6   2   1    3.70    2.30 
   5  -2  -1    3.30    2.80 
  -5   2   1    4.50    2.50 
  -4   2   1  718.23   30.40 
   3  -2  -1    0.60    0.90 
   3  -2  -1    1.20    1.40 
   3  -2  -1    0.80    0.70 
   3  -2  -1    0.20    1.00 
   3  -2  -1   -1.30    1.10 
  -3   2   1   -1.60    0.80 
  -3   2   1    0.60    1.30 
  -3   2   1   -0.60    0.80 
   2  -2  -1  943.51   31.50 
   2  -2  -1  965.10   32.40 
   2  -2  -1  945.11   30.60 
   2  -2  -1  955.40   30.80 
   2  -2  -1  919.51   30.80 
  -2   2   1  968.70   32.50 
  -2   2   1  942.71   30.20 
  -2   2   1  969.00   32.10 
  -2   2   1  951.60   30.90 
  -2   2   1  969.10   30.80 
   1  -2  -1  287.07   11.10 
   1  -2  -1  295.87   11.00 
  -1   2   1  284.37   10.80 
  -1   2   1  286.57   11.40 
  -1   2   1  280.87   10.80 
  -1   2   1  276.27   12.20 
   0  -2  -1   17.30    2.10 
   0  -2  -1   16.60    2.30 
   0  -2  -1   17.70    1.50 
   0  -2  -1   18.00    2.60 
   0   2   1   16.00    2.00 
   0   2   1   16.30    2.60 
   0   2   1   16.80    2.30 
   0   2   1   16.40    1.70 
   0   2   1   16.30    1.50 
  -1  -2  -1  408.06   15.40 
  -1  -2  -1  418.66   15.00 
  -1  -2  -1  407.86   14.80 
   1   2   1  413.86   15.50 
  -2  -2  -1   14.60    2.10 
  -2  -2  -1   15.90    2.40 
   2   2   1   13.30    2.00 
   2   2   1   15.20    2.60 
   2   2   1   17.70    2.50 
  -3  -2  -1   13.10    2.00 
  -3  -2  -1   14.90    2.10 
   3   2   1   16.30    2.40 
   3   2   1   12.90    2.20 
   3   2   1   13.30    2.50 
   3   2   1   12.70    1.80 
  -4  -2  -1  592.74   21.40 
   4   2   1  607.94   22.00 
  -5  -2  -1    1.20    1.60 
   5   2   1    1.50    2.20 
  -6  -2  -1   69.49    6.90 
  -6  -2  -1   75.19    7.30 
  -7  -2  -1   -0.90    2.10 
   7   2   1    0.20    2.80 
  -8  -2  -1    3.30    2.30 
   8   2   1    2.20    3.90 
  -9  -2  -1   -4.00    3.70 
  -9   3   1    8.50    4.30 
  -8   3   1   -1.70    2.50 
   7  -3  -1   -3.00    2.60 
  -7   3   1   -0.70    2.30 
   6  -3  -1    2.40    3.00 
  -6   3   1    0.40    2.60 
   5  -3  -1    5.30    3.20 
   5  -3  -1   -2.80    1.60 
  -5   3   1   -1.60    1.80 
   4  -3  -1   49.70    3.70 
   4  -3  -1   47.10    6.00 
   4  -3  -1   48.80    4.00 
   4  -3  -1   45.10    4.90 
   4  -3  -1   50.89    4.60 
  -4   3   1   50.19    4.10 
  -4   3   1   47.50    5.90 
  -4   3   1   52.19    5.60 
   3  -3  -1   29.20    3.80 
   3  -3  -1   24.60    3.20 
   3  -3  -1   24.30    3.00 
   3  -3  -1   31.30    4.40 
   3  -3  -1   24.10    2.70 
  -3   3   1   23.00    3.50 
  -3   3   1   26.50    3.90 
  -3   3   1   26.50    5.00 
   2  -3  -1  215.78    9.80 
   2  -3  -1  212.68   10.40 
   2  -3  -1  201.88    9.20 
  -2   3   1  206.48   10.30 
  -2   3   1  206.08    9.10 
  -2   3   1  220.88   10.10 
  -2   3   1  202.68    9.80 
  -2   3   1  206.58    9.40 
   1  -3  -1    2.30    1.60 
   1  -3  -1    2.60    1.20 
   1  -3  -1    1.20    0.90 
  -1   3   1    3.60    1.40 
  -1   3   1    0.80    1.20 
  -1   3   1    3.30    1.20 
  -1   3   1    2.70    1.30 
  -1   3   1   -0.60    1.20 
   0  -3  -1   10.70    2.30 
   0  -3  -1   12.20    2.70 
   0  -3  -1   12.80    2.60 
   0  -3  -1   12.10    1.60 
   0   3   1   11.30    1.50 
   0   3   1   13.50    2.40 
   0   3   1   14.10    2.60 
   0   3   1   13.90    3.10 
   0   3   1   12.20    1.90 
  -1  -3  -1   79.29    5.20 
  -1  -3  -1   80.69    5.90 
  -1  -3  -1   81.09    5.40 
   1   3   1   79.49    5.10 
   1   3   1   74.99    5.80 
   1   3   1   76.39    5.40 
  -2  -3  -1    3.90    1.50 
  -2  -3  -1   -0.90    1.20 
  -2  -3  -1    0.80    1.50 
   2   3   1    1.60    1.20 
   2   3   1    2.00    1.80 
  -3  -3  -1   -0.10    1.70 
  -3  -3  -1   -0.50    1.40 
  -3  -3  -1    0.70    1.40 
   3   3   1   -0.30    1.80 
   3   3   1    0.40    1.20 
   3   3   1   -0.20    1.40 
  -4  -3  -1    3.70    1.90 
  -4  -3  -1    7.30    1.80 
   4   3   1    5.60    1.70 
   4   3   1    4.50    2.30 
   4   3   1    3.80    2.60 
   4   3   1    2.90    1.90 
  -5  -3  -1   10.20    2.60 
  -5  -3  -1    5.10    2.10 
   5   3   1    8.30    3.10 
   5   3   1    4.40    2.30 
   5   3   1   11.30    3.10 
  -6  -3  -1    8.70    2.70 
  -6  -3  -1    5.00    2.30 
   6   3   1    7.00    2.90 
   6   3   1    9.10    3.30 
   6   3   1    5.80    3.10 
  -7  -3  -1    5.30    2.50 
  -7  -3  -1   -0.70    2.00 
   7   3   1   -4.90    2.50 
   7   3   1    1.10    2.40 
  -8  -3  -1    8.50    3.50 
   8   3   1   -0.70    3.20 
  -9   4   1    3.00    3.70 
  -8   4   1   -1.50    2.70 
   7  -4  -1   10.80    3.90 
  -7   4   1    4.30    3.20 
   6  -4  -1    2.80    2.40 
   6  -4  -1    9.20    4.20 
   6  -4  -1    2.40    2.90 
  -6   4   1    1.00    2.60 
   5  -4  -1    9.80    4.00 
   5  -4  -1   15.00    3.10 
   5  -4  -1   11.40    3.40 
   5  -4  -1   17.50    4.20 
  -5   4   1   11.00    2.70 
  -5   4   1   12.50    3.80 
   4  -4  -1   -0.50    2.00 
   4  -4  -1    1.90    2.50 
   4  -4  -1    4.90    2.50 
  -4   4   1    2.40    2.00 
  -4   4   1    1.30    1.70 
   3  -4  -1   39.60    4.20 
   3  -4  -1   49.60    5.00 
   3  -4  -1   41.80    3.90 
   3  -4  -1   34.10    4.40 
   3  -4  -1   48.80    5.40 
  -3   4   1   41.70    4.20 
  -3   4   1   43.60    5.10 
  -3   4   1   39.80    4.50 
  -3   4   1   47.10    4.80 
  -3   4   1   42.50    3.80 
   2  -4  -1   76.59    6.80 
  -2   4   1   95.79    7.00 
  -2   4   1   92.09    6.00 
  -2   4   1   85.69    6.30 
  -2   4   1   83.29    6.00 
  -2   4   1   87.29    6.10 
   1  -4  -1   51.49    5.40 
   1  -4  -1   52.69    4.20 
   1  -4  -1   49.70    4.90 
  -1   4   1   54.19    4.10 
  -1   4   1   41.40    5.10 
  -1   4   1   54.39    4.70 
  -1   4   1   53.29    4.50 
  -1   4   1   56.49    4.80 
   0  -4  -1   13.40    3.10 
   0  -4  -1   13.90    2.80 
   0  -4  -1   13.70    3.40 
   0  -4  -1   16.80    2.10 
   0   4   1   25.10    3.70 
   0   4   1   15.90    3.00 
   0   4   1   13.90    3.40 
   0   4   1   23.50    2.70 
  -1  -4  -1   53.19    3.20 
  -1  -4  -1   50.99    5.00 
  -1  -4  -1   50.69    5.30 
  -1  -4  -1   52.59    4.80 
   1   4   1   52.89    5.60 
   1   4   1   56.99    4.90 
   1   4   1   57.79    3.20 
  -2  -4  -1   14.40    3.50 
  -2  -4  -1   17.80    3.50 
   2   4   1   12.40    2.60 
   2   4   1   16.80    3.50 
   2   4   1   13.50    3.40 
  -3  -4  -1   -0.30    1.90 
  -3  -4  -1    1.30    1.70 
  -3  -4  -1   -1.40    1.60 
   3   4   1    3.40    1.70 
   3   4   1    0.80    1.50 
   3   4   1   -0.70    2.20 
  -4  -4  -1   11.90    3.00 
   4   4   1   12.40    3.70 
   4   4   1   14.90    3.40 
  -5  -4  -1   10.20    2.80 
   5   4   1   11.00    3.40 
   5   4   1   11.90    4.40 
  -6  -4  -1    5.20    2.20 
  -6  -4  -1    2.70    1.60 
  -6  -4  -1   -1.70    1.50 
   6   4   1    1.20    2.50 
   6   4   1   -0.30    2.20 
  -7  -4  -1    4.30    3.50 
  -7  -4  -1    2.20    2.90 
   7   4   1    4.60    3.40 
   7   4   1    2.70    3.60 
   8  -5  -1   -3.80    4.30 
   8  -5  -1    1.30    3.40 
  -8   5   1   -0.50    2.80 
   7  -5  -1   -0.20    4.20 
   7  -5  -1   -1.80    2.60 
  -7   5   1   -1.00    2.20 
   6  -5  -1    3.90    2.90 
  -6   5   1   -1.50    1.90 
  -6   5   1    2.20    2.20 
   5  -5  -1   -0.70    2.10 
   5  -5  -1   -4.10    2.60 
  -5   5   1   -0.90    1.80 
  -5   5   1   -2.40    1.60 
   4  -5  -1    2.50    2.00 
   4  -5  -1   -2.50    2.20 
  -4   5   1   -2.00    1.70 
  -4   5   1   -0.30    2.00 
  -4   5   1    0.80    2.20 
   3  -5  -1   85.39    7.50 
   3  -5  -1   79.89    7.50 
   3  -5  -1   85.69    6.30 
   3  -5  -1   72.79    6.30 
  -3   5   1   94.59    7.20 
  -3   5   1   90.79    7.60 
  -3   5   1   84.89    7.30 
  -3   5   1   86.79    6.70 
   2  -5  -1   64.49    5.80 
   2  -5  -1   55.59    6.50 
   2  -5  -1   55.49    6.00 
  -2   5   1   65.89    6.50 
  -2   5   1   52.79    5.70 
  -2   5   1   58.79    5.10 
  -2   5   1   52.99    5.30 
  -2   5   1   58.39    5.40 
   1  -5  -1   35.80    4.40 
   1  -5  -1   40.80    5.50 
   1  -5  -1   30.80    3.50 
   1  -5  -1   30.00    4.50 
  -1   5   1   31.60    4.00 
  -1   5   1   28.50    4.20 
  -1   5   1   35.60    4.30 
  -1   5   1   33.20    5.10 
  -1   5   1   39.10    3.80 
   0  -5  -1   79.79    7.10 
   0  -5  -1   66.19    4.80 
   0  -5  -1   63.89    6.20 
   0  -5  -1   73.39    7.40 
   0   5   1   85.99    5.70 
   0   5   1   76.09    7.40 
   0   5   1   73.69    6.40 
  -1  -5  -1   99.09    5.40 
  -1  -5  -1  105.59    8.10 
  -1  -5  -1  100.49    8.30 
  -1  -5  -1  115.99    8.00 
   1   5   1  128.29    9.40 
   1   5   1  106.99    5.40 
   1   5   1  107.29    7.60 
  -2  -5  -1    2.60    1.80 
  -2  -5  -1    4.50    2.50 
  -2  -5  -1    6.80    2.60 
   2   5   1    3.40    2.70 
   2   5   1    5.40    3.40 
  -3  -5  -1    5.30    2.80 
  -3  -5  -1    6.60    2.90 
   3   5   1   10.00    4.00 
   3   5   1   17.20    3.90 
  -4  -5  -1   12.80    3.50 
  -4  -5  -1   17.70    3.80 
   4   5   1   15.30    4.20 
   4   5   1   14.80    4.90 
  -5  -5  -1   -3.20    1.70 
   5   5   1   -2.00    2.50 
   5   5   1    0.00    3.00 
  -6  -5  -1    2.90    2.70 
  -6  -5  -1    0.90    2.40 
   6   5   1   -0.80    2.90 
   6   5   1   -2.70    3.40 
  -7  -5  -1   -2.70    2.00 
  -7  -5  -1    7.60    3.10 
  -7  -5  -1   -3.10    2.40 
   7   5   1    3.80    4.10 
   8  -6  -1    0.30    3.30 
  -8   6   1    1.10    3.20 
   7  -6  -1   -6.30    4.40 
   7  -6  -1   -2.30    2.50 
  -7   6   1    3.30    3.00 
   6  -6  -1    6.90    4.50 
   6  -6  -1   -2.90    2.70 
   6  -6  -1   -1.50    2.30 
  -6   6   1   -4.60    2.10 
   5  -6  -1   -2.40    2.50 
   5  -6  -1   -4.10    2.90 
   5  -6  -1   -0.70    2.20 
  -5   6   1    3.70    2.60 
  -5   6   1   -3.70    1.90 
   4  -6  -1    5.80    3.30 
   4  -6  -1   10.80    3.30 
  -4   6   1   13.50    4.10 
  -4   6   1    9.80    3.00 
  -4   6   1   13.30    3.70 
   3  -6  -1   23.30    5.90 
   3  -6  -1   28.00    5.60 
   3  -6  -1   19.20    6.00 
  -3   6   1   15.40    3.70 
  -3   6   1   17.00    3.70 
  -3   6   1   23.80    5.20 
   2  -6  -1   98.69    8.80 
   2  -6  -1   81.19    9.70 
   2  -6  -1   80.59    9.00 
  -2   6   1   85.29    7.00 
  -2   6   1  107.69    9.30 
  -2   6   1  100.69    7.90 
  -2   6   1   99.89    7.70 
   1  -6  -1   96.19    8.20 
   1  -6  -1  113.59    9.80 
   1  -6  -1  106.59    9.00 
  -1   6   1  101.39    8.20 
  -1   6   1  110.09    9.50 
  -1   6   1   99.19    7.30 
  -1   6   1   95.19    6.80 
  -1   6   1  105.09    8.10 
   0  -6  -1    6.50    3.30 
   0  -6  -1   -0.90    2.50 
   0  -6  -1    3.80    2.10 
   0  -6  -1    1.00    1.50 
   0   6   1   12.40    2.60 
   0   6   1    2.40    2.90 
   0   6   1    6.40    2.70 
   0   6   1   10.30    3.20 
  -1  -6  -1   68.89    7.10 
  -1  -6  -1   60.59    6.80 
  -1  -6  -1   49.99    4.00 
  -1  -6  -1   54.29    6.10 
   1   6   1   64.89    6.40 
   1   6   1   46.60    7.00 
   1   6   1   49.80    4.40 
   1   6   1   54.49    6.90 
   1   6   1   56.69    4.70 
  -2  -6  -1  142.59   10.30 
  -2  -6  -1  154.08   11.20 
   2   6   1  153.58   10.60 
   2   6   1  157.08   12.40 
  -3  -6  -1   56.89    6.60 
  -3  -6  -1   64.19    7.30 
   3   6   1   78.49    9.10 
  -4  -6  -1    6.30    3.30 
  -4  -6  -1    6.70    3.20 
   4   6   1    0.20    3.60 
  -5  -6  -1    1.30    2.30 
   5   6   1   -1.70    3.20 
  -6  -6  -1    7.50    3.60 
  -6  -6  -1   11.30    4.40 
   6   6   1    7.00    4.60 
  -7  -6  -1   -0.70    3.50 
  -7  -6  -1    1.10    2.80 
   7   6   1    5.40    4.60 
   8  -7  -1   -1.30    4.00 
  -8   7   1    0.90    3.30 
   7  -7  -1    4.10    3.90 
   7  -7  -1   -1.70    5.00 
  -7   7   1    3.40    3.30 
   6  -7  -1    3.70    4.00 
   6  -7  -1   17.00    5.00 
  -6   7   1   12.90    3.20 
  -6   7   1    3.50    3.20 
   5  -7  -1    0.00    3.40 
  -5   7   1    0.20    2.90 
  -5   7   1   -2.00    2.50 
  -5   7   1    2.30    3.00 
   4  -7  -1    4.10    3.60 
   4  -7  -1    6.80    4.00 
   4  -7  -1    9.50    3.10 
  -4   7   1    3.40    2.60 
  -4   7   1    2.90    2.60 
  -4   7   1    7.10    4.30 
   3  -7  -1   23.10    4.90 
   3  -7  -1   14.80    4.50 
  -3   7   1   16.10    4.60 
  -3   7   1   10.70    3.50 
  -3   7   1   13.90    3.70 
   2  -7  -1   15.90    3.90 
   2  -7  -1    8.70    4.50 
   2  -7  -1    9.00    4.10 
  -2   7   1   11.00    4.30 
  -2   7   1    9.30    3.00 
  -2   7   1    9.50    4.20 
   1  -7  -1   22.50    5.40 
   1  -7  -1    8.00    3.20 
  -1   7   1    9.50    4.40 
  -1   7   1   13.80    3.80 
  -1   7   1   14.80    4.90 
  -1   7   1   13.10    3.50 
  -1   7   1   18.30    3.40 
   0  -7  -1    2.60    2.30 
   0  -7  -1    0.40    2.70 
   0  -7  -1    2.60    2.90 
   0   7   1   -0.90    2.80 
   0   7   1    2.00    3.60 
   0   7   1    1.10    2.60 
   0   7   1    0.40    2.20 
   0   7   1    5.70    2.30 
  -1  -7  -1   35.70    6.40 
  -1  -7  -1   37.30    6.20 
  -1  -7  -1   35.90    3.90 
   1   7   1   55.99    6.70 
   1   7   1   40.40    4.80 
   1   7   1   36.20    4.60 
   1   7   1   34.20    7.40 
   1   7   1   35.70    6.10 
  -2  -7  -1   13.80    4.50 
  -2  -7  -1   13.30    3.90 
   2   7   1    4.00    4.00 
   2   7   1   15.00    5.40 
  -3  -7  -1    9.50    3.50 
  -3  -7  -1    4.80    3.50 
   3   7   1    2.40    3.40 
  -4  -7  -1   -1.60    4.00 
  -4  -7  -1    3.80    2.70 
   4   7   1    0.50    3.50 
  -5  -7  -1    0.50    2.50 
  -5  -7  -1   -0.90    2.70 
   5   7   1    3.50    4.30 
  -6  -7  -1    2.60    5.30 
  -6  -7  -1   -0.70    2.20 
   6   7   1   -2.60    4.30 
  -7  -7  -1   -0.90    3.00 
   7   7   1    0.90    7.30 
  -7   8   1   -1.00    2.70 
   6  -8  -1  -10.80    6.30 
   6  -8  -1    3.10    3.80 
  -6   8   1    7.50    3.70 
  -6   8   1   11.00    3.90 
   5  -8  -1   -5.90    3.80 
   5  -8  -1    0.30    3.30 
  -5   8   1    7.60    4.10 
  -5   8   1   -1.00    2.50 
  -5   8   1    4.00    2.90 
   4  -8  -1   -0.30    3.10 
   4  -8  -1    5.70    5.40 
  -4   8   1    1.00    2.80 
  -4   8   1    3.20    3.90 
  -4   8   1    1.60    2.40 
   3  -8  -1   15.90    6.20 
   3  -8  -1    4.90    3.60 
  -3   8   1    9.20    3.70 
  -3   8   1    9.60    4.00 
  -3   8   1   13.20    5.20 
   2  -8  -1    2.40    3.50 
   2  -8  -1   11.00    4.50 
   2  -8  -1   -1.00    2.60 
  -2   8   1   -1.10    3.40 
  -2   8   1    6.20    3.40 
  -2   8   1    6.70    3.00 
   1  -8  -1    6.20    3.10 
   1  -8  -1    1.00    3.10 
   1  -8  -1    2.60    3.00 
  -1   8   1    0.50    2.10 
  -1   8   1    0.40    3.10 
  -1   8   1   -0.20    3.10 
   0  -8  -1    1.40    3.30 
   0  -8  -1    1.90    2.50 
   0   8   1    0.90    2.80 
   0   8   1   -2.50    3.20 
   0   8   1   -2.80    2.30 
   0   8   1    1.00    2.30 
  -1  -8  -1    3.00    3.00 
  -1  -8  -1    3.00    2.90 
   1   8   1    8.50    2.90 
   1   8   1    6.70    4.30 
   1   8   1    5.70    3.00 
   1   8   1   -3.50    3.10 
  -2  -8  -1    2.00    3.40 
   2   8   1   -0.60    3.40 
   2   8   1    3.10    3.40 
  -3  -8  -1   -1.50    3.00 
  -3  -8  -1   -3.30    2.70 
   3   8   1    0.80    3.90 
   3   8   1    9.00    5.20 
  -4  -8  -1   -0.60    3.10 
  -4  -8  -1   -3.00    3.20 
   4   8   1    0.90    4.90 
   4   8   1   -6.00    5.50 
  -5  -8  -1    3.40    3.30 
  -5  -8  -1    2.70    5.00 
   5   8   1    2.60    4.10 
   5   8   1   -6.10    6.90 
  -6  -8  -1   -1.60    3.90 
   6   8   1    9.00    5.30 
   6  -9  -1    8.20    5.30 
  -6   9   1    0.70    3.00 
   5  -9  -1    3.20    4.30 
  -5   9   1   -0.60    2.70 
   4  -9  -1    7.10    4.20 
   4  -9  -1    6.70    5.20 
   4  -9  -1   10.50    6.40 
  -4   9   1   12.70    5.70 
  -4   9   1    8.50    3.90 
  -4   9   1    0.10    2.70 
   3  -9  -1   14.20    6.40 
   3  -9  -1   13.40    6.20 
   3  -9  -1   10.80    5.00 
  -3   9   1    9.40    4.80 
  -3   9   1    2.20    3.30 
  -3   9   1    6.10    4.70 
   2  -9  -1    5.40    4.60 
   2  -9  -1   -1.10    2.50 
   2  -9  -1    4.20    3.40 
  -2   9   1    0.30    2.50 
  -2   9   1   -3.10    2.90 
  -2   9   1    1.90    4.10 
   1  -9  -1   14.40    5.40 
   1  -9  -1    5.30    3.60 
  -1   9   1    3.90    3.00 
  -1   9   1   11.60    5.50 
   0  -9  -1    7.90    3.80 
   0  -9  -1    3.80    3.80 
   0   9   1   14.00    4.40 
   0   9   1    3.00    2.90 
   0   9   1   10.70    5.60 
  -1  -9  -1    1.00    3.80 
  -1  -9  -1    2.00    3.40 
   1   9   1    3.00    3.40 
   1   9   1   11.50    4.20 
   1   9   1    4.00    4.60 
  -2  -9  -1    5.90    4.10 
  -2  -9  -1    2.40    3.50 
   2   9   1   -4.00    3.60 
   2   9   1    2.70    4.60 
  -3  -9  -1    8.60    5.40 
  -3  -9  -1   -3.80    3.30 
  -3  -9  -1    3.70    3.70 
   3   9   1   -1.20    4.40 
   3   9   1   12.20    5.80 
  -4  -9  -1    4.10    5.00 
   4   9   1   -6.20    6.80 
   4   9   1   -5.80    4.20 
  -5  -9  -1   -0.40    4.70 
   5   9   1    7.10    8.10 
  -6  -9  -1   -9.00    4.80 
   6   9   1  -12.10    6.20 
   4 -10  -1    1.20    4.10 
  -4  10   1   -2.90    2.90 
   3 -10  -1    6.90    5.30 
   3 -10  -1    0.40    3.90 
   3 -10  -1   -1.90    7.60 
  -3  10   1    2.50    3.60 
   2 -10  -1    2.90    5.60 
   2 -10  -1   -1.00    5.10 
  -2  10   1   -8.60    3.90 
  -2  10   1   -1.50    3.70 
   1 -10  -1   -0.60    3.90 
   1 -10  -1   -2.60    4.70 
  -1  10   1    2.10    4.10 
  -1  10   1   -2.30    3.10 
  -1  10   1   -1.60    4.20 
   0 -10  -1   -0.40    3.80 
   0 -10  -1   -2.80    3.50 
   0  10   1   -7.20    4.30 
   0  10   1   -3.00    3.40 
  -1 -10  -1   -3.10    4.40 
  -1 -10  -1   -0.50    3.90 
  -1 -10  -1   13.70    6.30 
   1  10   1    4.40    4.10 
   1  10   1   18.70    6.50 
   1  10   1   -0.90    4.30 
  -2 -10  -1    3.20    4.40 
  -2 -10  -1   -0.10    4.00 
   2  10   1    7.50    5.50 
   2  10   1    4.70    5.10 
  -3 -10  -1    3.80    4.30 
   3  10   1   -1.20    4.80 
  -4 -10  -1   -4.50    4.10 
   4  10   1  -10.10    5.50 
   3 -11  -1   -3.90    4.40 
  -3  11   1   -6.10    2.90 
   2 -11  -1    6.10    4.80 
  -2  11   1   -0.70    3.50 
   1 -11  -1   -0.10    5.20 
   1 -11  -1   -6.00    4.80 
  -1  11   1    2.40    6.30 
  -1  11   1   -3.50    3.70 
   0 -11  -1    5.90    5.10 
   0 -11  -1    0.70    5.20 
   0  11   1    3.60    4.60 
   0  11   1    3.20    5.90 
  -1 -11  -1   -4.00    5.30 
  -1 -11  -1    9.20    6.60 
   1  11   1   -0.30    6.50 
   1  11   1    2.60    3.90 
  -2 -11  -1   -1.40    5.30 
   2  11   1    1.00    5.80 
  -3 -11  -1    2.30    5.20 
   3  11   1   -5.00    5.80 
  -3 -11   2   -0.20    5.70 
   2  11  -2   -4.30    5.50 
  -2 -11   2   10.50    5.60 
   1  11  -2    7.90    5.80 
   1  11  -2   -7.60    4.00 
  -1 -11   2   -3.20    6.70 
   0  11  -2    6.60    5.70 
   0  11  -2   10.40    6.30 
   0 -11   2    9.50    6.30 
   0 -11   2    9.10    6.50 
  -1  11  -2    1.70    4.50 
   1 -11   2   -4.20    5.50 
   1 -11   2   -3.90    4.80 
  -2  11  -2    3.90    4.10 
   2 -11   2    2.50    4.50 
   2 -11   2   -3.20    5.20 
  -3  11  -2   -3.30    3.20 
   3 -11   2    6.10    6.60 
   4  10  -2   -4.00    4.90 
  -4 -10   2   10.10    4.90 
   3  10  -2   -1.30    6.00 
  -3 -10   2    6.10    4.80 
   2  10  -2    2.40    7.00 
  -2 -10   2   -1.70    4.10 
  -2 -10   2   -2.00    4.10 
   1  10  -2    7.30    4.40 
   1  10  -2    3.70    6.90 
  -1 -10   2   -2.40    3.70 
  -1 -10   2    2.20    4.30 
   0  10  -2    9.20    5.70 
   0  10  -2    0.10    3.70 
   0 -10   2   -5.20    3.90 
   0 -10   2   -3.90    3.60 
  -1  10  -2   -1.00    2.70 
  -1  10  -2   11.30    4.10 
  -1  10  -2   -5.60    4.50 
   1 -10   2    2.40    4.20 
   1 -10   2    0.30    2.80 
  -2  10  -2    0.70    3.10 
  -2  10  -2   -2.40    3.70 
  -2  10  -2    1.90    5.10 
   2 -10   2   -2.70    3.30 
   2 -10   2    6.60    4.20 
  -3  10  -2   -0.30    3.30 
   3 -10   2   10.00    5.40 
   3 -10   2    3.70    5.00 
  -4  10  -2   13.10    4.40 
   4 -10   2    5.50    5.10 
   6   9  -2   12.40    8.00 
  -6  -9   2    6.30    5.60 
   5   9  -2    8.10    7.00 
  -5  -9   2    5.90    3.60 
   4   9  -2    8.00    8.70 
   4   9  -2    2.90    6.40 
  -4  -9   2    4.10    4.70 
   3   9  -2    0.70    4.30 
   3   9  -2   13.20    5.70 
  -3  -9   2   -1.00    4.10 
  -3  -9   2   11.00    4.90 
   2   9  -2    6.20    5.60 
   2   9  -2    2.10    4.70 
   2   9  -2    3.40    2.80 
  -2  -9   2    1.50    2.30 
  -2  -9   2    5.40    4.60 
  -2  -9   2    2.40    4.30 
   1   9  -2    0.70    3.50 
   1   9  -2   -0.80    3.70 
   1   9  -2    1.60    3.50 
  -1  -9   2    3.20    2.20 
  -1  -9   2    4.00    3.60 
  -1  -9   2    2.40    3.80 
   0   9  -2   -2.10    3.70 
   0   9  -2    6.70    3.30 
   0   9  -2    6.20    4.40 
   0  -9   2    5.10    4.10 
   0  -9   2   -2.60    3.60 
  -1   9  -2    3.90    3.10 
  -1   9  -2    2.10    2.60 
  -1   9  -2    5.10    4.60 
   1  -9   2    9.50    4.50 
   1  -9   2   -1.20    3.00 
  -2   9  -2   20.70    5.10 
  -2   9  -2   12.60    4.10 
  -2   9  -2    5.80    4.70 
   2  -9   2   10.70    5.60 
   2  -9   2   28.80    6.60 
   2  -9   2   15.00    8.60 
  -3   9  -2    6.10    3.50 
  -3   9  -2    7.00    5.00 
  -3   9  -2    0.10    4.50 
   3  -9   2    8.90    5.20 
   3  -9   2    2.40    4.30 
  -4   9  -2   56.79    9.90 
  -4   9  -2   52.79    8.20 
  -4   9  -2   74.49    9.00 
   4  -9   2   49.00    9.80 
   4  -9   2   69.29   10.50 
   4  -9   2   42.10   10.90 
  -5   9  -2   -1.20    3.00 
  -6   9  -2    8.50    4.30 
   6  -9   2   13.20    5.40 
   6   8  -2   -3.70    5.00 
   5   8  -2    2.60    4.50 
  -5  -8   2    5.90    3.80 
   4   8  -2   33.10    8.10 
  -4  -8   2   22.50    6.70 
  -4  -8   2   32.10    7.60 
   3   8  -2   32.60    8.00 
  -3  -8   2   36.40    7.60 
  -3  -8   2   35.70    7.00 
   2   8  -2   26.20    7.10 
   2   8  -2   35.80    4.60 
   2   8  -2   24.60    4.70 
  -2  -8   2   26.60    7.20 
  -2  -8   2   36.20    4.10 
  -2  -8   2   29.10    6.10 
   1   8  -2   74.99   10.40 
   1   8  -2   54.29    5.80 
   1   8  -2   40.00    6.10 
   1   8  -2   51.99    8.30 
  -1  -8   2   72.59    8.30 
  -1  -8   2   57.19    5.20 
  -1  -8   2   49.99    8.10 
   0   8  -2    3.40    2.60 
   0   8  -2   -2.60    3.40 
   0   8  -2    1.30    2.50 
   0  -8   2    3.80    3.40 
   0  -8   2   -1.50    3.60 
   0  -8   2    2.00    2.00 
   0  -8   2    2.60    2.60 
  -1   8  -2   21.50    4.20 
  -1   8  -2   28.00    6.00 
  -1   8  -2    9.40    4.50 
   1  -8   2   22.80    5.30 
   1  -8   2   14.90    5.20 
  -2   8  -2   45.40    6.30 
  -2   8  -2   34.60    7.30 
  -2   8  -2   33.80    7.50 
   2  -8   2   40.60    7.40 
   2  -8   2   48.30    7.90 
   2  -8   2   41.10    8.00 
  -3   8  -2    0.20    2.50 
  -3   8  -2    3.60    3.60 
  -3   8  -2    4.30    3.30 
   3  -8   2    4.10    3.10 
   3  -8   2    1.00    3.40 
   3  -8   2   -4.90    4.30 
  -4   8  -2   27.50    5.60 
  -4   8  -2   46.40    8.50 
  -4   8  -2   35.70    6.30 
   4  -8   2   38.90    8.80 
   4  -8   2   41.90    8.10 
  -5   8  -2    1.80    2.90 
  -5   8  -2    0.70    3.30 
   5  -8   2    1.70    3.90 
   5  -8   2   -4.90    5.50 
   5  -8   2   -4.30    5.60 
  -6   8  -2   -0.80    2.90 
  -6   8  -2   -1.60    3.00 
   6  -8   2   -0.60    3.60 
   6  -8   2   -6.30    5.50 
  -7   8  -2   -1.50    2.90 
   7  -8   2    3.20    3.90 
  -7  -7   2   -0.10    3.10 
   6   7  -2   13.40    5.00 
   6   7  -2    1.60    5.10 
  -6  -7   2    7.30    3.50 
   5   7  -2    2.70    3.80 
   5   7  -2    6.20    4.70 
  -5  -7   2    1.50    2.70 
  -5  -7   2    3.10    3.10 
   4   7  -2   -0.70    3.70 
   4   7  -2    9.40    4.60 
  -4  -7   2    3.00    3.10 
  -4  -7   2    4.40    3.10 
   3   7  -2    7.70    3.60 
   3   7  -2    3.60    3.90 
  -3  -7   2    2.70    3.10 
   2   7  -2   10.10    2.70 
   2   7  -2    7.20    4.70 
  -2  -7   2    6.50    3.80 
  -2  -7   2   14.80    2.70 
  -2  -7   2    9.70    4.20 
   1   7  -2   20.20    4.50 
   1   7  -2   31.40    4.60 
  -1  -7   2   19.80    5.10 
  -1  -7   2   15.30    4.50 
  -1  -7   2   12.70    6.80 
   0   7  -2   43.80    5.50 
   0   7  -2   53.29    6.40 
   0   7  -2   63.49    8.20 
   0   7  -2   35.50    4.70 
   0   7  -2   57.89    7.20 
   0  -7   2   51.49    6.70 
   0  -7   2   56.29    7.80 
   0  -7   2   51.09    4.90 
  -1   7  -2   37.40    6.60 
  -1   7  -2   34.80    4.90 
  -1   7  -2   36.10    5.10 
  -1   7  -2   37.90    7.30 
   1  -7   2   40.30    5.80 
   1  -7   2   45.00    7.40 
   1  -7   2   38.30    4.70 
   1  -7   2   32.10    6.80 
  -2   7  -2   38.60    5.20 
  -2   7  -2   48.50   11.10 
   2  -7   2   28.40    6.30 
   2  -7   2   42.70    7.70 
   2  -7   2   37.80    6.80 
  -3   7  -2    3.30    3.10 
  -3   7  -2    3.20    2.60 
  -3   7  -2    7.50    3.40 
   3  -7   2    1.20    3.20 
   3  -7   2    3.40    3.60 
   3  -7   2    3.80    2.60 
  -4   7  -2    2.00    2.20 
  -4   7  -2    0.90    4.00 
  -4   7  -2   -2.10    1.70 
   4  -7   2    2.40    4.20 
   4  -7   2    1.00    2.80 
  -5   7  -2    0.90    2.20 
  -5   7  -2    4.20    2.60 
   5  -7   2    4.00    3.30 
   5  -7   2    1.30    3.60 
   5  -7   2    2.40    3.60 
  -6   7  -2   -1.90    2.30 
  -6   7  -2    2.60    3.10 
   6  -7   2   -1.10    3.60 
   6  -7   2   -4.20    3.70 
  -7   7  -2    2.60    3.00 
  -7   7  -2   -5.60    2.70 
   7  -7   2   -3.50    3.60 
   7  -7   2    5.90    5.80 
   8   6  -2    9.80    5.80 
  -8  -6   2    1.20    5.20 
   7   6  -2    3.20    4.50 
   7   6  -2   -3.40    5.00 
  -7  -6   2    2.20    2.70 
  -7  -6   2   -4.80    3.50 
   6   6  -2    2.60    3.70 
   6   6  -2    9.80    5.30 
  -6  -6   2    3.90    3.60 
   5   6  -2    4.30    3.90 
   5   6  -2   -1.30    3.00 
  -5  -6   2   -1.10    2.20 
   4   6  -2    2.10    2.60 
   4   6  -2    5.80    3.20 
  -4  -6   2    3.90    2.60 
   3   6  -2   16.10    4.70 
   3   6  -2   22.40    3.20 
   3   6  -2   17.40    5.00 
  -3  -6   2   20.70    4.90 
  -3  -6   2   21.30    4.90 
   2   6  -2   -2.50    2.00 
   2   6  -2    2.30    3.10 
   2   6  -2    0.20    2.70 
  -2  -6   2    0.80    1.50 
  -2  -6   2    4.50    2.50 
   1   6  -2    6.20    2.90 
   1   6  -2   -1.40    2.90 
   1   6  -2   -0.10    2.30 
   1   6  -2    4.80    2.10 
  -1  -6   2    2.80    1.50 
  -1  -6   2   -0.80    1.90 
  -1  -6   2   -2.40    2.20 
   0   6  -2    0.90    1.60 
   0   6  -2    2.40    2.00 
   0   6  -2    0.20    2.50 
   0   6  -2    1.90    1.70 
   0  -6   2    0.20    1.40 
   0  -6   2    1.20    2.00 
   0  -6   2   -0.80    2.20 
   0  -6   2    2.40    2.40 
  -1   6  -2    0.90    2.00 
  -1   6  -2    0.90    2.20 
  -1   6  -2   -0.50    2.00 
  -1   6  -2    3.10    2.00 
  -1   6  -2    3.40    2.50 
   1  -6   2    7.10    3.00 
   1  -6   2    2.30    1.90 
   1  -6   2    2.00    2.20 
  -2   6  -2    4.20    2.40 
  -2   6  -2    1.70    2.70 
  -2   6  -2    1.10    1.70 
  -2   6  -2    2.00    2.00 
   2  -6   2   -1.40    2.20 
   2  -6   2    1.40    2.60 
   2  -6   2    0.90    1.50 
  -3   6  -2   25.50    5.20 
  -3   6  -2   29.70    4.40 
  -3   6  -2   27.20    4.90 
   3  -6   2   18.50    4.70 
   3  -6   2   20.70    5.20 
  -4   6  -2   12.20    3.30 
  -4   6  -2   16.20    3.90 
  -4   6  -2   19.20    4.40 
   4  -6   2   16.50    4.00 
   4  -6   2   16.00    4.50 
  -5   6  -2    5.00    2.50 
   5  -6   2    3.30    2.80 
   5  -6   2    3.60    3.00 
   5  -6   2    5.00    3.50 
  -6   6  -2    3.80    2.50 
  -6   6  -2   -1.40    1.90 
   6  -6   2   -2.50    2.40 
   6  -6   2    2.50    3.20 
   6  -6   2    4.50    4.20 
  -7   6  -2    1.10    2.20 
   7  -6   2   -1.80    4.10 
   7  -6   2    2.00    3.00 
  -8   6  -2    3.00    3.30 
   8  -6   2   -2.20    3.40 
   8  -6   2   -7.60    5.80 
   8   5  -2    8.70    5.20 
   7   5  -2    2.40    4.10 
   7   5  -2   -0.40    3.70 
  -7  -5   2    0.50    2.70 
   6   5  -2    6.00    3.60 
   6   5  -2    1.60    3.40 
  -6  -5   2    5.20    2.90 
  -6  -5   2    3.50    2.10 
   5   5  -2    4.80    4.30 
   5   5  -2    1.90    3.30 
  -5  -5   2    6.80    2.60 
  -5  -5   2    5.30    2.50 
   4   5  -2    2.20    2.90 
   4   5  -2   -1.70    2.10 
   4   5  -2   -1.10    1.70 
  -4  -5   2    2.80    2.30 
  -4  -5   2    3.10    2.30 
   3   5  -2    9.90    3.80 
   3   5  -2    5.50    2.00 
   3   5  -2    9.20    3.40 
  -3  -5   2   11.50    3.30 
  -3  -5   2    6.70    1.70 
  -3  -5   2    4.00    2.70 
   2   5  -2    0.50    2.30 
   2   5  -2   -0.30    1.40 
   2   5  -2    2.00    2.00 
  -2  -5   2   -0.40    1.00 
  -2  -5   2   -0.10    1.80 
  -2  -5   2   -0.50    2.00 
  -2  -5   2   -2.00    1.70 
   1   5  -2    1.60    2.20 
   1   5  -2    0.40    1.80 
   1   5  -2    0.80    2.50 
   1   5  -2    0.80    1.90 
  -1  -5   2    1.90    1.20 
  -1  -5   2    3.70    1.80 
  -1  -5   2   -0.20    1.90 
  -1  -5   2    0.00    1.60 
   0   5  -2    9.90    3.20 
   0   5  -2   11.10    2.20 
   0   5  -2    8.00    2.90 
   0  -5   2   11.20    3.40 
   0  -5   2   11.20    3.50 
   0  -5   2   13.40    3.40 
   0  -5   2   11.40    2.40 
  -1   5  -2   18.00    3.60 
  -1   5  -2   13.70    2.90 
  -1   5  -2   22.20    4.10 
  -1   5  -2   16.20    3.80 
  -1   5  -2   19.40    3.00 
   1  -5   2   17.80    4.20 
   1  -5   2   17.30    3.90 
   1  -5   2   21.60    3.90 
   1  -5   2   18.00    3.10 
  -2   5  -2   45.40    4.90 
  -2   5  -2   48.30    5.90 
  -2   5  -2   43.10    5.50 
  -2   5  -2   37.50    4.40 
   2  -5   2   50.09    5.60 
   2  -5   2   43.20    5.90 
   2  -5   2   48.10    5.00 
   2  -5   2   48.80    5.80 
  -3   5  -2   29.60    4.60 
  -3   5  -2   32.10    4.90 
  -3   5  -2   31.80    4.40 
  -3   5  -2   34.30    4.50 
   3  -5   2   39.10    5.10 
   3  -5   2   35.90    4.50 
  -4   5  -2    3.60    2.20 
  -4   5  -2    3.10    2.10 
   4  -5   2    2.90    2.50 
   4  -5   2   -1.10    2.10 
   4  -5   2    0.90    2.60 
  -5   5  -2    0.80    1.50 
  -5   5  -2   -0.50    1.70 
   5  -5   2    2.60    2.20 
   5  -5   2    4.50    2.90 
   5  -5   2   -0.40    2.60 
  -6   5  -2   85.49    6.70 
  -6   5  -2   86.09    9.50 
   6  -5   2   88.49    8.20 
   6  -5   2  102.49    9.00 
  -7   5  -2    2.70    3.00 
   7  -5   2    6.10    4.20 
   7  -5   2    6.60    3.10 
  -8   5  -2    9.30    4.40 
   8  -5   2    8.10    4.10 
   8  -5   2   -9.20    4.60 
   9   4  -2   -3.40    5.90 
  -9  -4   2   -4.10    3.10 
   8   4  -2    6.70    3.40 
   8   4  -2    0.90    3.60 
   8   4  -2   -3.80    4.20 
  -8  -4   2   -0.50    2.80 
   7   4  -2    6.00    3.50 
   7   4  -2    1.40    3.20 
   7   4  -2   -0.90    3.00 
  -7  -4   2    3.70    1.90 
   6   4  -2    8.20    3.30 
   6   4  -2   13.50    4.00 
  -6  -4   2    8.90    2.50 
   5   4  -2    5.30    2.40 
   5   4  -2    9.40    3.60 
   5   4  -2    0.40    2.50 
  -5  -4   2    0.30    1.50 
  -5  -4   2    2.80    1.90 
   4   4  -2    3.80    3.10 
   4   4  -2   10.90    3.20 
   4   4  -2   13.20    2.80 
  -4  -4   2   13.30    2.40 
  -4  -4   2   10.30    2.90 
   3   4  -2   11.50    2.40 
   3   4  -2    8.10    2.30 
   3   4  -2   10.40    3.30 
  -3  -4   2   11.80    3.00 
  -3  -4   2    8.50    2.10 
  -3  -4   2    7.90    2.40 
  -3  -4   2   11.90    2.90 
   2   4  -2    2.80    1.60 
   2   4  -2    4.60    2.30 
  -2  -4   2    3.30    1.80 
  -2  -4   2    1.40    1.70 
   1   4  -2   65.69    5.50 
   1   4  -2   68.19    5.70 
   1   4  -2   67.29    4.10 
   1   4  -2   69.69    6.30 
  -1  -4   2   68.19    6.00 
  -1  -4   2   69.89    4.00 
  -1  -4   2   69.49    5.50 
   0   4  -2   79.19    5.90 
   0   4  -2   78.19    6.10 
   0   4  -2   79.29    6.50 
   0   4  -2   84.79    4.70 
   0  -4   2   78.19    6.20 
   0  -4   2   73.59    5.70 
   0  -4   2   83.79    4.80 
   0  -4   2   85.59    6.90 
  -1   4  -2   47.00    4.30 
  -1   4  -2   41.90    4.30 
  -1   4  -2   47.50    5.00 
  -1   4  -2   45.70    4.50 
  -1   4  -2   53.69    4.10 
   1  -4   2   48.70    4.50 
   1  -4   2   49.70    5.40 
   1  -4   2   51.99    4.10 
   1  -4   2   42.50    4.70 
  -2   4  -2  140.49    7.80 
  -2   4  -2  139.49    7.90 
  -2   4  -2  138.69    8.60 
  -2   4  -2  139.69    8.10 
  -2   4  -2  139.39    8.40 
   2  -4   2  135.19    8.10 
   2  -4   2  140.49    9.10 
   2  -4   2  143.09    8.50 
  -3   4  -2  175.18    8.80 
  -3   4  -2  182.38    9.60 
  -3   4  -2  180.68   10.70 
  -3   4  -2  189.88   10.30 
  -3   4  -2  187.58    9.60 
   3  -4   2  190.48    9.70 
   3  -4   2  181.48   10.50 
   3  -4   2  187.78   10.20 
  -4   4  -2   12.00    2.90 
  -4   4  -2   10.60    3.20 
   4  -4   2   11.50    3.20 
   4  -4   2   14.80    3.90 
   4  -4   2   11.90    2.80 
  -5   4  -2    9.70    2.60 
  -5   4  -2    8.00    3.20 
   5  -4   2    6.90    3.10 
   5  -4   2    6.40    2.70 
   6  -4   2   12.60    3.20 
   6  -4   2   12.40    3.50 
  -7   4  -2    1.40    2.10 
   7  -4   2   -0.30    2.30 
  -8   4  -2    3.60    3.90 
   8  -4   2    0.40    3.10 
  -9   4  -2    5.20    4.60 
   9   3  -2   10.10    6.40 
   8   3  -2    0.00    3.50 
  -8  -3   2    2.70    2.60 
   7   3  -2   -4.10    2.80 
   6   3  -2    1.90    2.60 
  -6  -3   2   -0.60    2.00 
   5   3  -2    4.20    2.50 
   5   3  -2    1.40    2.30 
   5   3  -2   -0.30    2.10 
  -5  -3   2    1.70    1.90 
  -5  -3   2    2.00    1.80 
   4   3  -2  386.36   15.40 
   4   3  -2  366.06   14.80 
   4   3  -2  358.76   16.00 
   4   3  -2  373.36   16.60 
  -4  -3   2  382.26   15.50 
  -4  -3   2  369.26   14.20 
   3   3  -2   49.90    4.00 
   3   3  -2   40.50    4.60 
   3   3  -2   51.29    3.80 
   3   3  -2   49.80    4.60 
  -3  -3   2   51.49    3.40 
  -3  -3   2   49.10    4.10 
  -3  -3   2   54.19    4.50 
  -3  -3   2   40.80    4.00 
   2   3  -2  107.89    7.00 
   2   3  -2  102.99    4.80 
   2   3  -2   98.39    6.00 
  -2  -3   2  104.29    4.70 
  -2  -3   2   99.09    6.10 
  -2  -3   2  104.49    6.40 
  -2  -3   2   92.69    6.30 
   1   3  -2  533.45   21.00 
   1   3  -2  556.84   20.20 
   1   3  -2  597.34   18.10 
   1   3  -2  527.55   20.40 
  -1  -3   2  518.15   19.90 
  -1  -3   2  576.04   18.00 
  -1  -3   2  535.25   20.90 
  -1  -3   2  531.85   20.40 
   0   3  -2 2912.01   91.69 
   0   3  -2 2936.41   91.59 
   0   3  -2 3050.49   92.69 
   0   3  -2 3089.49   89.79 
   0  -3   2 2895.81   91.89 
   0  -3   2 2807.42   91.29 
   0  -3   2 3007.10   92.69 
   0  -3   2 2864.81   90.99 
  -1   3  -2  321.67   12.20 
  -1   3  -2  319.97   12.70 
  -1   3  -2  307.27   12.60 
  -1   3  -2  302.47   13.20 
   1  -3   2  286.57   13.30 
   1  -3   2  294.57   12.50 
   1  -3   2  302.57   12.90 
   1  -3   2  325.57   12.40 
  -2   3  -2  123.59    7.50 
  -2   3  -2  124.89    6.50 
  -2   3  -2  130.69    6.90 
  -2   3  -2  131.19    7.20 
  -2   3  -2  131.39    7.20 
   2  -3   2  127.59    7.10 
   2  -3   2  139.99    7.50 
   2  -3   2  131.89    6.90 
  -3   3  -2    0.50    1.50 
  -3   3  -2    0.60    1.60 
  -3   3  -2    1.00    1.40 
   3  -3   2    1.90    1.30 
   3  -3   2    0.80    1.50 
  -4   3  -2  304.57   14.70 
  -4   3  -2  295.67   12.30 
  -4   3  -2  297.17   15.50 
   4  -3   2  311.27   13.70 
  -5   3  -2   41.00    5.70 
  -6   3  -2    4.80    2.70 
  -7   3  -2    7.90    3.60 
  -8   3  -2    4.10    3.30 
  -9   3  -2    1.60    3.70 
   9   2  -2   11.50    5.30 
  -9  -2   2    4.00    3.60 
   8   2  -2   -1.60    3.10 
  -8  -2   2    2.60    3.20 
   7   2  -2   -1.30    2.90 
  -7  -2   2    3.90    2.50 
   6   2  -2   43.70    6.00 
  -6  -2   2   45.70    5.10 
   5   2  -2    2.70    2.40 
  -5  -2   2    0.90    1.80 
   4   2  -2  222.48   10.70 
  -4  -2   2  216.48    9.90 
  -4  -2   2  222.88    9.50 
   3   2  -2   20.10    2.80 
   3   2  -2   19.90    2.70 
   3   2  -2   20.90    2.20 
   3   2  -2   17.60    2.70 
  -3  -2   2   21.40    2.50 
  -3  -2   2   19.20    2.40 
   2   2  -2   61.99    4.00 
   2   2  -2   55.79    4.20 
   2   2  -2   62.19    3.60 
   2   2  -2   54.99    4.30 
  -2  -2   2   59.99    4.20 
  -2  -2   2   60.69    4.00 
  -2  -2   2   57.19    4.10 
  -2  -2   2   66.99    3.30 
   1   2  -2  446.06   17.10 
   1   2  -2  468.55   15.80 
   1   2  -2  450.35   16.70 
  -1  -2   2  455.95   16.80 
  -1  -2   2  439.26   16.40 
  -1  -2   2  456.85   17.30 
  -1  -2   2  535.15   15.10 
   0   2  -2  117.59    5.90 
   0   2  -2  121.39    6.10 
   0   2  -2  129.99    5.10 
   0   2  -2  128.79    6.60 
   0  -2   2  111.29    7.40 
   0  -2   2  132.99    6.70 
   0  -2   2  134.99    5.30 
   0  -2   2  117.19    5.90 
  -1   2  -2  606.34   20.10 
  -1   2  -2  583.94   20.50 
  -1   2  -2  579.04   20.10 
   1  -2   2  599.44   20.40 
   1  -2   2  595.84   20.30 
  -2   2  -2  362.66   14.30 
  -2   2  -2  369.06   14.80 
  -2   2  -2  378.16   12.90 
  -2   2  -2  365.46   13.40 
   2  -2   2  375.76   14.00 
   2  -2   2  376.76   13.50 
   2  -2   2  372.46   14.60 
  -3   2  -2   37.60    3.90 
  -3   2  -2   38.40    4.20 
  -3   2  -2   44.50    3.10 
   3  -2   2   41.60    4.50 
  -4   2  -2    0.30    1.80 
   4  -2   2   -1.20    1.90 
  -5   2  -2   40.00    5.00 
   5  -2   2   45.10    5.80 
  -6   2  -2   11.50    4.00 
   6  -2   2   12.20    4.40 
  -7   2  -2   -0.30    2.20 
  -8   2  -2   -3.90    2.60 
  -9   2  -2    6.40    4.70 
   9   1  -2    3.60    4.90 
  -9  -1   2   -3.20    3.40 
   8   1  -2    3.50    4.00 
  -8  -1   2   -2.40    2.60 
   7   1  -2    1.40    2.70 
  -7  -1   2    0.70    2.20 
   6   1  -2    4.20    2.60 
  -6  -1   2    0.90    2.00 
   5   1  -2   39.40    5.10 
  -5  -1   2   42.50    4.60 
   4   1  -2   70.69    5.80 
  -4  -1   2   68.49    5.30 
   3   1  -2    0.00    1.10 
  -3  -1   2    0.90    1.10 
   2   1  -2  133.89    5.70 
   2   1  -2  136.69    6.00 
   2   1  -2  135.99    6.20 
  -2  -1   2  132.19    5.60 
  -2  -1   2  145.69    6.10 
   1   1  -2    6.50    1.10 
   1   1  -2    5.30    1.30 
   1   1  -2    7.20    1.20 
  -1  -1   2    4.20    1.20 
  -1  -1   2    6.50    1.20 
  -1  -1   2    7.80    1.50 
  -1  -1   2    7.90    1.10 
  -1   1  -2   15.70    1.50 
  -1   1  -2   16.30    1.70 
  -1   1  -2   16.60    1.60 
   1  -1   2   20.10    1.60 
   1  -1   2   20.30    1.60 
   1  -1   2   18.60    1.80 
   1  -1   2   17.10    1.60 
  -2   1  -2   17.50    2.30 
  -2   1  -2   23.10    2.90 
   2  -1   2   18.10    2.70 
   2  -1   2   20.00    2.50 
  -3   1  -2   98.89    6.40 
  -3   1  -2  105.69    6.20 
   3  -1   2  100.79    6.50 
  -4   1  -2   61.09    5.20 
  -4   1  -2   61.59    5.60 
   4  -1   2   62.69    5.70 
  -5   1  -2   -0.30    1.60 
  -5   1  -2    1.10    1.90 
   5  -1   2    0.60    2.20 
  -6   1  -2    0.70    2.10 
   6  -1   2    2.30    2.70 
  -7   1  -2    1.30    2.40 
  -8   1  -2   -1.30    2.80 
  -9   1  -2    3.50    4.00 
   9   0  -2    1.40    3.90 
  -9   0   2    5.90    3.90 
   7   0  -2    3.80    3.50 
  -7   0   2    4.00    2.60 
   6   0  -2   12.40    4.30 
  -6   0   2    8.90    3.00 
   5   0  -2    7.90    3.10 
  -5   0   2    8.60    2.80 
   4   0  -2    4.50    2.30 
  -4   0   2    2.10    1.80 
   3   0  -2   -1.80    1.10 
  -3   0   2    0.90    1.20 
   2   0  -2  231.28    9.60 
   1   0  -2   59.69    2.90 
   1   0  -2   52.09    2.30 
   1   0  -2   64.89    3.20 
  -1   0   2   48.30    2.80 
  -1   0  -2    7.10    1.10 
  -1   0  -2    8.40    1.10 
   1   0   2    6.60    1.00 
  -2   0  -2 1885.91   58.29 
  -2   0  -2 1866.01   57.99 
   2   0   2 1868.41   58.29 
  -3   0  -2   28.50    3.20 
  -3   0  -2   28.50    3.00 
   3   0   2   28.50    3.30 
  -4   0  -2  311.57   13.70 
  -4   0  -2  308.67   13.40 
   4   0   2  298.67   13.80 
  -5   0  -2   21.40    6.50 
  -5   0  -2   20.40    4.10 
   5   0   2   28.20    4.80 
  -6   0  -2   35.90    5.40 
   6   0   2   40.40    5.80 
  -7   0  -2   -1.20    1.60 
   7   0   2    1.50    3.20 
  -8   0  -2    2.70    3.50 
  -9   0  -2   -3.20    3.60 
   9  -1  -2    1.70    4.10 
  -9   1   2    3.00    4.00 
   8  -1  -2   -1.80    3.50 
  -8   1   2   -0.30    2.80 
   7  -1  -2    3.00    3.30 
  -7   1   2    5.70    3.10 
   6  -1  -2   -1.60    2.30 
  -6   1   2   -2.10    1.70 
   5  -1  -2   42.40    5.60 
  -5   1   2   44.10    5.30 
  -5   1   2   33.30    4.70 
   4  -1  -2   57.59    5.80 
  -4   1   2   53.29    5.50 
   3  -1  -2   33.50    3.90 
  -3   1   2   24.20    3.30 
   2  -1  -2 2234.28   68.19 
   2  -1  -2 2205.98   67.99 
   2  -1  -2 2313.47   70.49 
  -2   1   2 2223.38   70.09 
  -2   1   2 2251.57   68.19 
   1  -1  -2  151.28    5.80 
   1  -1  -2  153.28    6.50 
   1  -1  -2  154.48    5.80 
  -1   1   2  155.68    6.20 
  -1   1   2  150.08    6.40 
  -1   1   2  147.79    5.80 
  -1   1   2  151.18    5.70 
  -1   1   2  151.98    5.80 
   0   1   2 1570.54   48.00 
  -1  -1  -2   50.19    2.70 
  -1  -1  -2   46.00    2.60 
  -1  -1  -2   51.89    3.00 
   1   1   2   49.50    2.60 
   1   1   2   48.50    3.10 
  -2  -1  -2 2700.83   82.59 
  -2  -1  -2 2706.43   82.19 
   2   1   2 2746.63   83.69 
  -3  -1  -2   10.30    2.00 
   3   1   2   10.50    2.10 
  -4  -1  -2  218.68   10.70 
  -4  -1  -2  219.28   10.40 
   4   1   2  233.28   11.00 
  -5  -1  -2   22.50    3.80 
  -5  -1  -2   11.60    2.90 
   5   1   2   13.30    3.50 
  -6  -1  -2   36.50    5.10 
  -6  -1  -2   45.60    5.50 
   6   1   2   46.20    6.00 
  -7  -1  -2   -0.50    2.00 
   7   1   2    4.70    3.40 
  -8  -1  -2    1.70    3.10 
  -9  -1  -2   -0.90    4.00 
  -9   2   2    3.60    4.40 
   8  -2  -2    4.40    4.30 
  -8   2   2    6.30    3.30 
   7  -2  -2    1.00    3.30 
  -7   2   2    1.80    2.30 
   6  -2  -2    2.70    3.30 
  -6   2   2    6.40    3.20 
   5  -2  -2    8.00    3.50 
  -5   2   2    3.80    2.40 
  -4   2   2  598.94   24.60 
   3  -2  -2    4.60    1.50 
   3  -2  -2    2.30    1.60 
   3  -2  -2    3.30    1.10 
  -3   2   2    2.80    1.80 
  -3   2   2    6.20    2.00 
  -3   2   2    4.10    1.30 
   2  -2  -2  296.67   11.30 
   2  -2  -2  295.57   12.70 
   2  -2  -2  299.67   11.40 
   2  -2  -2  296.87   11.20 
   2  -2  -2  296.27   12.00 
  -2   2   2  304.97   11.60 
  -2   2   2  300.97   12.70 
  -2   2   2  301.47   11.30 
  -2   2   2  292.57   10.80 
  -2   2   2  305.67   12.40 
   1  -2  -2  232.68    9.40 
   1  -2  -2  212.48    9.50 
   1  -2  -2  230.68    9.40 
   1  -2  -2  216.58    9.80 
  -1   2   2  230.98    9.20 
  -1   2   2  226.48    9.10 
  -1   2   2  228.28    9.80 
  -1   2   2  216.38   10.40 
  -1   2   2  267.47   10.60 
   0  -2  -2 1553.04   49.00 
   0  -2  -2 1615.84   49.80 
   0   2   2 1578.34   47.70 
   0   2   2 1448.66   53.39 
   0   2   2 1563.94   48.70 
   0   2   2 1530.25   47.50 
   0   2   2 1575.64   48.90 
  -1  -2  -2  585.94   20.30 
  -1  -2  -2  574.54   20.70 
  -1  -2  -2  588.14   20.20 
   1   2   2  612.54   21.10 
   1   2   2  592.24   21.00 
  -2  -2  -2   30.30    3.00 
  -2  -2  -2   30.40    2.70 
  -2  -2  -2   29.70    2.70 
   2   2   2   30.00    2.60 
   2   2   2   28.80    2.90 
   2   2   2   27.20    3.20 
  -3  -2  -2    5.20    1.60 
  -3  -2  -2    3.00    1.30 
   3   2   2    4.20    1.70 
   3   2   2    4.90    1.50 
   3   2   2    2.80    1.20 
   3   2   2    4.20    1.50 
  -4  -2  -2  315.87   13.00 
   4   2   2  327.27   13.40 
  -5  -2  -2    6.30    2.10 
  -5  -2  -2   10.20    2.60 
   5   2   2    5.90    2.80 
   6   2   2   23.70    5.40 
  -7  -2  -2   -0.90    2.20 
   7   2   2    1.70    2.70 
  -8  -2  -2   -3.10    2.70 
  -9  -2  -2    3.90    4.50 
  -9   3   2   -2.30    3.60 
   8  -3  -2   -2.10    3.50 
  -8   3   2    3.60    3.70 
   7  -3  -2    0.30    2.70 
  -7   3   2   -1.10    2.30 
   6  -3  -2   67.49    8.70 
   6  -3  -2   83.29    7.40 
  -6   3   2   70.19    8.00 
   5  -3  -2    6.80    2.70 
   5  -3  -2    4.60    3.20 
  -5   3   2    5.80    2.60 
   4  -3  -2  263.87   14.30 
   4  -3  -2  272.47   11.40 
   4  -3  -2  271.17   11.00 
   4  -3  -2  259.07   12.50 
   4  -3  -2  263.87   11.80 
  -4   3   2  276.97   13.90 
  -4   3   2  266.97   11.20 
  -4   3   2  251.47   13.70 
   3  -3  -2  211.68   11.10 
   3  -3  -2  204.08    9.50 
   3  -3  -2  188.58    9.10 
   3  -3  -2  193.68   10.10 
   3  -3  -2  200.78    8.90 
  -3   3   2  200.38    8.40 
  -3   3   2  206.38   10.60 
  -3   3   2  198.18    9.20 
  -3   3   2  201.08   10.80 
  -3   3   2  197.48   10.60 
   2  -3  -2   30.50    3.10 
   2  -3  -2   35.40    3.90 
   2  -3  -2   29.00    3.40 
  -2   3   2   31.40    3.20 
  -2   3   2   31.80    3.70 
  -2   3   2   28.30    3.00 
  -2   3   2   32.60    3.80 
  -2   3   2   28.80    3.30 
   1  -3  -2  249.38   10.50 
   1  -3  -2  257.87   11.00 
   1  -3  -2  238.88   10.60 
   1  -3  -2  238.68   11.50 
  -1   3   2  236.28   10.40 
  -1   3   2  233.58   10.40 
  -1   3   2  254.97   10.20 
  -1   3   2  239.58   10.60 
  -1   3   2  248.58   11.50 
   0  -3  -2  941.91   32.30 
   0  -3  -2  959.30   32.60 
   0  -3  -2  958.10   33.40 
   0  -3  -2  934.81   30.50 
   0   3   2  970.60   32.20 
   0   3   2  953.20   30.70 
   0   3   2  966.30   30.40 
   0   3   2  942.01   32.20 
   0   3   2  972.40   33.40 
  -1  -3  -2   78.39    5.90 
  -1  -3  -2   85.59    5.50 
  -1  -3  -2   93.89    5.90 
   1   3   2   82.29    6.00 
   1   3   2   88.89    5.40 
  -2  -3  -2  136.89    7.80 
  -2  -3  -2  134.69    7.50 
  -2  -3  -2  145.99    7.50 
   2   3   2  135.99    7.10 
   2   3   2  141.29    8.30 
  -3  -3  -2   95.59    6.00 
   3   3   2   88.29    6.10 
   3   3   2   97.09    6.80 
   3   3   2   95.89    5.60 
  -4  -3  -2   -1.80    1.20 
   4   3   2    1.90    1.40 
   4   3   2    0.50    1.90 
   4   3   2   -2.20    2.00 
   4   3   2    2.50    1.70 
  -5  -3  -2   33.70    3.80 
  -5  -3  -2   34.80    3.90 
   5   3   2   31.90    5.20 
   5   3   2   28.80    4.20 
   5   3   2   29.90    4.00 
  -6  -3  -2    4.50    2.50 
  -6  -3  -2   11.30    2.60 
   6   3   2    7.10    3.10 
   6   3   2    3.90    2.90 
   6   3   2    9.30    3.00 
  -7  -3  -2    0.30    2.10 
  -7  -3  -2    2.10    2.00 
   7   3   2    4.00    3.20 
   7   3   2    6.40    3.10 
  -8  -3  -2    0.50    2.90 
  -9   4   2    3.10    3.90 
  -8   4   2    1.50    3.00 
   7  -4  -2    3.10    3.70 
   7  -4  -2   -4.80    2.80 
  -7   4   2    1.30    2.90 
   6  -4  -2   -1.50    1.90 
   6  -4  -2   -2.10    2.30 
   6  -4  -2    0.10    3.00 
  -6   4   2    0.80    2.40 
   5  -4  -2    9.90    3.30 
   5  -4  -2   11.40    3.80 
   5  -4  -2   10.90    4.20 
   5  -4  -2   14.10    2.80 
  -5   4   2    9.80    3.70 
  -5   4   2    8.70    2.60 
   4  -4  -2   12.40    3.90 
   4  -4  -2    8.50    2.80 
   4  -4  -2   12.20    4.20 
  -4   4   2    7.00    2.20 
  -4   4   2    9.50    3.00 
   3  -4  -2   24.80    3.40 
   3  -4  -2   25.50    3.00 
   3  -4  -2   24.10    3.80 
   3  -4  -2   24.70    4.60 
  -3   4   2   24.30    3.70 
  -3   4   2   19.60    2.80 
  -3   4   2   25.40    3.40 
  -3   4   2   25.80    3.70 
  -3   4   2   22.10    4.30 
   2  -4  -2   92.49    6.80 
   2  -4  -2  107.19    7.10 
   2  -4  -2   98.69    7.50 
   2  -4  -2  101.29    6.30 
  -2   4   2   93.79    6.50 
  -2   4   2  106.89    7.50 
  -2   4   2   99.09    6.50 
  -2   4   2   95.69    6.80 
  -2   4   2   93.69    6.20 
   1  -4  -2   73.89    6.00 
   1  -4  -2   71.19    6.30 
  -1   4   2   73.29    4.90 
  -1   4   2   63.99    8.50 
  -1   4   2   67.89    5.40 
  -1   4   2   70.59    5.50 
  -1   4   2   68.39    5.20 
   0  -4  -2   10.90    2.70 
   0  -4  -2   13.40    3.40 
   0  -4  -2    9.50    1.80 
   0  -4  -2    8.70    2.60 
   0   4   2   12.70    2.20 
   0   4   2    8.40    3.00 
   0   4   2   11.00    2.70 
   0   4   2   12.40    1.90 
   0   4   2    9.30    2.70 
  -1  -4  -2   22.50    3.60 
  -1  -4  -2   24.20    3.50 
  -1  -4  -2   16.30    3.50 
   1   4   2   26.00    4.20 
   1   4   2   16.10    3.00 
  -2  -4  -2   40.50    4.10 
  -2  -4  -2   29.60    3.90 
  -2  -4  -2   32.90    4.30 
   2   4   2   28.20    4.20 
   2   4   2   29.70    4.60 
   2   4   2   25.90    3.40 
  -3  -4  -2   -1.00    1.90 
  -3  -4  -2    4.40    2.00 
  -3  -4  -2    1.50    2.00 
   3   4   2    7.90    2.40 
   3   4   2    4.90    2.20 
   3   4   2    2.00    2.50 
  -4  -4  -2    6.50    2.50 
   4   4   2    2.90    2.60 
   4   4   2    5.10    2.80 
  -5  -4  -2    3.60    2.20 
   5   4   2    5.90    3.40 
   5   4   2    8.90    3.20 
  -6  -4  -2    5.80    2.50 
  -6  -4  -2   -0.60    1.50 
  -6  -4  -2    1.10    1.60 
   6   4   2    1.10    2.50 
   6   4   2    2.40    2.40 
  -7  -4  -2    0.70    2.30 
   7   4   2   -4.00    3.10 
  -8  -4  -2    6.00    3.50 
   8  -5  -2    0.80    5.70 
   8  -5  -2    2.00    2.80 
  -8   5   2   -1.40    3.00 
   7  -5  -2   -1.60    3.60 
  -7   5   2   -1.20    2.60 
   6  -5  -2    1.60    3.00 
   6  -5  -2    6.70    3.20 
  -6   5   2   -2.10    1.90 
   5  -5  -2   -3.90    2.70 
   5  -5  -2    0.20    2.00 
  -5   5   2   -1.60    1.70 
  -5   5   2    1.80    1.90 
   4  -5  -2    5.10    2.30 
   4  -5  -2    4.00    3.00 
  -4   5   2    4.40    2.40 
  -4   5   2    7.60    2.80 
   3  -5  -2   32.40    5.20 
   3  -5  -2   24.10    3.60 
  -3   5   2   22.90    4.30 
  -3   5   2   21.50    4.50 
  -3   5   2   25.50    4.30 
  -3   5   2   19.80    4.10 
   2  -5  -2   16.90    4.10 
   2  -5  -2   22.10    4.00 
   2  -5  -2   16.40    4.30 
   2  -5  -2   18.60    3.80 
  -2   5   2   23.20    3.40 
  -2   5   2   18.30    4.20 
  -2   5   2   12.60    3.10 
  -2   5   2   20.00    3.40 
  -2   5   2   18.50    3.90 
   1  -5  -2    1.30    2.00 
   1  -5  -2    1.20    1.80 
   1  -5  -2    5.00    2.80 
  -1   5   2    3.20    2.10 
  -1   5   2   -0.70    1.70 
  -1   5   2    3.20    2.30 
  -1   5   2    1.70    1.60 
  -1   5   2    4.70    1.60 
   0  -5  -2  111.69    8.50 
   0  -5  -2  129.19    9.50 
   0  -5  -2  121.49    6.50 
   0  -5  -2  117.19    8.20 
   0   5   2  123.19    8.50 
   0   5   2  113.29    6.20 
   0   5   2  127.49    9.40 
   0   5   2  123.39    6.90 
   0   5   2  113.79    8.00 
  -1  -5  -2   12.80    3.10 
  -1  -5  -2   13.50    3.80 
  -1  -5  -2   12.30    3.50 
   1   5   2    9.60    3.40 
   1   5   2   14.80    2.20 
   1   5   2   18.50    3.70 
   1   5   2   11.60    3.30 
  -2  -5  -2   -1.70    1.40 
  -2  -5  -2   -0.70    2.00 
  -2  -5  -2    4.10    2.20 
   2   5   2   -2.50    2.80 
  -3  -5  -2    7.70    3.20 
  -3  -5  -2   14.00    3.70 
   3   5   2    6.70    3.70 
  -4  -5  -2    1.90    2.40 
  -4  -5  -2    2.30    2.00 
   4   5   2    2.40    2.70 
   4   5   2   -0.20    2.80 
  -5  -5  -2   -0.50    2.20 
   5   5   2   -4.40    2.40 
   5   5   2    4.50    3.50 
  -6  -5  -2   13.00    3.90 
  -6  -5  -2   11.60    3.60 
   6   5   2    5.90    4.20 
  -7  -5  -2    6.30    3.40 
  -7  -5  -2   -1.20    2.80 
   7   5   2   -2.00    2.80 
   8  -6  -2    9.00    4.30 
  -8   6   2    5.10    3.80 
   7  -6  -2   -1.30    2.70 
   7  -6  -2   -0.80    4.20 
  -7   6   2    0.60    2.20 
   6  -6  -2    0.10    2.60 
   6  -6  -2   -5.30    2.20 
   6  -6  -2    2.20    3.70 
  -6   6   2    0.30    2.20 
  -6   6   2    0.90    2.00 
   5  -6  -2    2.30    2.80 
   5  -6  -2    2.60    2.60 
   5  -6  -2    0.00    2.80 
  -5   6   2   -1.40    1.70 
  -5   6   2    0.60    1.90 
   4  -6  -2   -0.10    2.40 
   4  -6  -2    2.90    2.30 
   4  -6  -2    3.60    2.80 
  -4   6   2   -1.40    2.60 
  -4   6   2   -0.80    1.90 
  -4   6   2    0.40    2.20 
   3  -6  -2    5.90    3.80 
   3  -6  -2   -1.10    2.10 
   3  -6  -2    2.40    3.10 
  -3   6   2    0.30    1.90 
  -3   6   2    0.10    1.90 
  -3   6   2    1.40    2.80 
   2  -6  -2    3.20    2.90 
   2  -6  -2    4.10    2.40 
   2  -6  -2    5.80    3.90 
   2  -6  -2    2.70    2.30 
  -2   6   2    0.10    2.60 
  -2   6   2    3.80    2.60 
  -2   6   2    6.30    2.40 
  -2   6   2    2.40    3.60 
  -2   6   2    1.10    2.60 
   1  -6  -2   26.40    5.50 
   1  -6  -2   31.00    6.30 
   1  -6  -2   33.20    4.90 
  -1   6   2   34.60    4.70 
  -1   6   2   31.30    5.20 
  -1   6   2   28.30    3.80 
  -1   6   2   37.60    5.90 
  -1   6   2   36.70    4.50 
   0  -6  -2   67.79    7.40 
   0  -6  -2   68.89    6.60 
   0  -6  -2   59.19    7.10 
   0   6   2   62.19    7.60 
   0   6   2   60.99    6.30 
   0   6   2   61.29    4.80 
   0   6   2   64.39    5.40 
   0   6   2   60.89    6.60 
  -1  -6  -2    1.60    2.40 
  -1  -6  -2    5.20    3.00 
  -1  -6  -2    8.60    3.30 
  -1  -6  -2    3.30    1.50 
   1   6   2    7.00    3.50 
   1   6   2    6.30    2.70 
   1   6   2    9.10    2.20 
   1   6   2    2.80    2.10 
   1   6   2    1.50    3.20 
  -2  -6  -2    6.80    2.80 
  -2  -6  -2    6.20    2.80 
   2   6   2    5.90    3.80 
   2   6   2   11.90    4.20 
   2   6   2    5.20    2.50 
  -3  -6  -2    3.40    2.90 
  -3  -6  -2    8.80    3.50 
   3   6   2    9.00    4.30 
  -4  -6  -2   13.60    3.70 
  -4  -6  -2    9.90    3.60 
  -5  -6  -2    0.40    2.20 
  -5  -6  -2   -2.40    3.00 
   5   6   2   -1.70    3.30 
  -6  -6  -2   30.70    6.40 
  -6  -6  -2   19.40    5.30 
   6   6   2   24.10    6.50 
  -7  -6  -2    0.70    4.20 
  -7  -6  -2    4.50    3.40 
   7   6   2    5.90    4.50 
   7   6   2    4.40    5.90 
  -8   7   2    0.70    3.70 
   7  -7  -2    1.60    5.90 
   7  -7  -2    6.80    3.70 
  -7   7   2    0.10    3.10 
   6  -7  -2   -2.80    5.80 
   6  -7  -2   -2.30    2.40 
   6  -7  -2    3.00    3.60 
  -6   7   2   10.90    3.20 
  -6   7   2    0.20    2.60 
   5  -7  -2    3.90    4.00 
  -5   7   2    7.30    3.30 
  -5   7   2   13.80    4.30 
  -5   7   2    8.00    3.70 
   4  -7  -2    4.70    2.70 
   4  -7  -2    2.50    3.00 
   4  -7  -2    7.50    3.80 
  -4   7   2    1.00    3.30 
  -4   7   2   -1.20    2.00 
  -4   7   2    1.30    2.60 
   3  -7  -2    7.40    3.00 
   3  -7  -2    0.90    4.50 
   3  -7  -2    5.80    3.40 
  -3   7   2    2.90    2.90 
  -3   7   2    2.70    2.60 
  -3   7   2    1.50    2.60 
   2  -7  -2    1.40    2.80 
   2  -7  -2   12.20    4.10 
   2  -7  -2    5.00    3.80 
  -2   7   2    0.20    2.30 
  -2   7   2    1.10    2.90 
  -2   7   2    2.80    2.00 
   1  -7  -2   24.10    5.20 
   1  -7  -2   31.20    6.40 
  -1   7   2   31.70    4.90 
  -1   7   2   33.80    5.20 
  -1   7   2   36.10    4.40 
  -1   7   2   23.80    5.50 
  -1   7   2   17.20    5.10 
   0  -7  -2   75.99    8.70 
   0  -7  -2   80.29    7.90 
   0  -7  -2   81.99    8.70 
   0   7   2   67.69    9.60 
   0   7   2   84.69    6.70 
   0   7   2   73.89    9.00 
   0   7   2   72.19    7.20 
   0   7   2   66.39    5.60 
  -1  -7  -2   30.60    5.70 
  -1  -7  -2   30.70    6.20 
   1   7   2   34.00    4.50 
   1   7   2   28.60    6.70 
   1   7   2   45.90    6.70 
   1   7   2   31.80    4.30 
   1   7   2   30.50    5.60 
  -2  -7  -2    6.00    3.30 
  -2  -7  -2    3.00    3.10 
   2   7   2    2.60    3.80 
   2   7   2   -1.30    2.70 
  -3  -7  -2    1.90    3.00 
  -3  -7  -2    2.30    2.40 
   3   7   2   -0.20    3.90 
   3   7   2   -4.00    3.10 
  -4  -7  -2   50.49    7.20 
   4   7   2   42.00    8.70 
   4   7   2   32.40    7.80 
  -5  -7  -2   -3.30    2.50 
  -5  -7  -2    1.00    4.40 
  -5  -7  -2    0.70    2.50 
   5   7   2   -2.60    3.80 
  -6  -7  -2    4.20    4.00 
   6   7   2   -2.20    3.90 
   6   7   2    5.10    5.20 
  -7  -7  -2    4.30    3.70 
   7   7   2   -2.00    5.10 
   7  -8  -2   -4.90    3.60 
  -7   8   2    2.20    3.70 
   6  -8  -2    0.80    3.40 
  -6   8   2    2.50    3.10 
  -6   8   2    8.20    3.40 
   5  -8  -2   -6.40    5.20 
   5  -8  -2   -6.40    3.60 
   5  -8  -2    1.90    3.30 
  -5   8   2    3.80    3.30 
  -5   8   2    0.40    2.40 
  -5   8   2   -0.60    3.50 
   4  -8  -2   31.40    7.40 
  -4   8   2   17.90    4.90 
  -4   8   2   31.90    6.20 
  -4   8   2   25.20    5.60 
   3  -8  -2    7.60    4.40 
   3  -8  -2   12.20    5.40 
   3  -8  -2   10.40    5.00 
  -3   8   2    6.30    3.20 
  -3   8   2    4.90    4.20 
  -3   8   2    8.20    3.70 
   2  -8  -2    5.50    3.80 
   2  -8  -2    3.50    3.80 
   2  -8  -2   10.60    4.30 
  -2   8   2    5.30    2.80 
  -2   8   2    4.40    3.50 
  -2   8   2   11.10    4.60 
   1  -8  -2   33.70    6.30 
   1  -8  -2   39.80    7.50 
   1  -8  -2   29.90    6.80 
  -1   8   2   27.10    6.90 
  -1   8   2   30.10    5.90 
  -1   8   2   27.90    6.80 
  -1   8   2   30.20    4.90 
   0  -8  -2    0.00    2.90 
   0  -8  -2   -4.40    2.30 
   0  -8  -2   -2.20    2.20 
   0   8   2    0.70    3.30 
   0   8   2    7.70    4.30 
   0   8   2   -0.80    2.40 
  -1  -8  -2   18.70    5.40 
  -1  -8  -2   14.30    4.80 
   1   8   2   12.90    5.30 
   1   8   2   15.60    3.60 
   1   8   2   26.80    4.10 
   1   8   2   12.60    4.40 
  -2  -8  -2    0.30    3.10 
  -2  -8  -2   -3.90    2.90 
   2   8   2    0.70    3.40 
   2   8   2    3.40    4.20 
  -3  -8  -2   -1.00    3.10 
  -3  -8  -2   -1.30    3.50 
   3   8   2    3.10    4.30 
   3   8   2    1.80    4.40 
  -4  -8  -2   -0.50    3.10 
  -4  -8  -2    8.50    4.40 
  -4  -8  -2    0.50    3.80 
   4   8   2    2.20    4.50 
   4   8   2   -2.10    5.50 
  -5  -8  -2   -0.20    4.20 
  -5  -8  -2    7.10    4.30 
   5   8   2    1.50    6.30 
   5   8   2   -2.40    3.60 
   6   8   2    7.00    5.50 
   6  -9  -2   13.30    5.50 
  -6   9   2    7.00    4.20 
   5  -9  -2   -0.90    3.50 
  -5   9   2    1.90    2.50 
   4  -9  -2   13.30    6.60 
   4  -9  -2    8.20    4.40 
   4  -9  -2   10.50    4.60 
  -4   9   2    8.00    4.50 
  -4   9   2    3.20    3.20 
  -4   9   2    8.00    4.80 
   3  -9  -2    3.60    5.30 
   3  -9  -2    5.00    4.40 
   3  -9  -2    2.50    3.90 
  -3   9   2    3.30    4.50 
  -3   9   2   -1.60    4.10 
   2  -9  -2   13.60    5.90 
   2  -9  -2    5.40    4.00 
   2  -9  -2    0.40    2.80 
  -2   9   2    1.80    2.80 
  -2   9   2   -0.60    4.10 
  -2   9   2    4.40    3.50 
   1  -9  -2    3.60    3.60 
  -1   9   2    5.30    4.00 
  -1   9   2    1.30    2.80 
   0  -9  -2    9.30    3.60 
   0  -9  -2   11.20    6.20 
   0   9   2    9.40    3.30 
   0   9   2    2.40    3.90 
   0   9   2   -1.10    3.80 
  -1  -9  -2   -2.10    3.00 
  -1  -9  -2    1.80    3.60 
   1   9   2   -1.70    2.80 
   1   9   2    1.10    3.60 
   1   9   2   -4.90    3.30 
  -2  -9  -2   -5.50    4.40 
  -2  -9  -2    5.90    4.00 
  -2  -9  -2    6.00    3.90 
   2   9   2    0.00    4.50 
   2   9   2    4.60    4.90 
  -3  -9  -2   -5.00    3.30 
  -3  -9  -2    0.50    3.90 
  -3  -9  -2   -1.90    4.60 
   3   9   2    1.50    5.40 
   3   9   2   -1.10    0.70 
   3   9   2   -5.40    4.70 
  -4  -9  -2    1.80    3.50 
   4   9   2   -5.00    7.90 
   4   9   2   -5.40    4.70 
  -5  -9  -2   -1.70    3.70 
   5   9   2   -8.50    5.50 
  -6  -9  -2   -6.00    4.00 
   4 -10  -2    5.60    4.40 
  -4  10   2    0.70    2.40 
   3 -10  -2    2.80    4.80 
   3 -10  -2   -5.40    9.60 
   3 -10  -2    0.20    4.50 
  -3  10   2    1.30    2.90 
   2 -10  -2   -7.40    3.40 
   2 -10  -2   -3.90    3.70 
  -2  10   2   -1.70    3.60 
  -2  10   2   -3.30    5.50 
  -2  10   2   -4.90    2.60 
   1 -10  -2    5.40    4.80 
   1 -10  -2   -4.90    3.60 
  -1  10   2    6.50    3.00 
  -1  10   2   11.60    5.70 
   0 -10  -2    5.30    4.50 
   0 -10  -2    2.00    3.60 
   0  10   2    2.50    3.20 
   0  10   2   -3.70    4.60 
  -1 -10  -2    1.10    4.80 
  -1 -10  -2    4.60    4.50 
  -1 -10  -2   -8.40    4.40 
   1  10   2   -1.90    3.50 
   1  10   2   -2.50    4.70 
   1  10   2   -2.80    4.10 
  -2 -10  -2    0.60    5.10 
  -2 -10  -2    7.70    4.70 
  -3 -10  -2    4.80    4.40 
   3  10   2    2.70    5.80 
  -4 -10  -2   -0.10    5.60 
   4  10   2   -2.70    7.10 
   3 -11  -2    4.50    5.90 
  -3  11   2    3.10    4.20 
   2 -11  -2    6.80    5.90 
  -2  11   2    3.40    3.50 
   1 -11  -2    0.10    4.90 
   1 -11  -2    0.50    5.10 
  -1  11   2    5.90    4.00 
  -1  11   2    8.30    8.10 
   0 -11  -2    6.20    5.60 
   0 -11  -2    0.20    5.60 
   0  11   2    1.90    4.80 
   0  11   2   -1.40    3.70 
  -1 -11  -2   -2.40    5.30 
  -1 -11  -2   -0.90    6.30 
   1  11   2   -5.30    6.00 
  -2 -11  -2   -4.20    4.40 
   2  11   2    2.40    8.10 
  -3 -11  -2   -0.80    5.20 
   3  11   2    2.70    6.50 
   3  11  -3    1.20    5.20 
  -3 -11   3   -7.20    4.10 
   2  11  -3    3.30    5.90 
  -2 -11   3    9.10    5.00 
   1  11  -3    5.60    4.70 
   1  11  -3   16.50    6.20 
  -1 -11   3   -2.70    6.70 
   0  11  -3    2.80    5.60 
   0  11  -3    5.70    5.40 
   0 -11   3    6.90    6.40 
   0 -11   3    5.60    6.90 
  -1  11  -3    3.70    4.30 
   1 -11   3   -6.30    5.00 
   1 -11   3    1.40    4.90 
  -2  11  -3   -0.50    3.50 
   2 -11   3    3.00    4.70 
   2 -11   3   -0.90    4.70 
  -3  11  -3    4.20    4.40 
   3 -11   3    6.90    5.50 
   4  10  -3    7.40    6.70 
  -4 -10   3    2.70    4.20 
   3  10  -3    4.80    5.80 
  -3 -10   3   -2.30    3.60 
   2  10  -3    1.70    3.20 
   2  10  -3   13.40    5.70 
   2  10  -3    3.40    5.00 
  -2 -10   3    6.00    4.90 
  -2 -10   3    6.20    4.90 
   1  10  -3   -0.10    3.80 
   1  10  -3    1.30    5.00 
  -1 -10   3    4.30    4.90 
  -1 -10   3   -1.10    3.60 
   0  10  -3    3.60    4.30 
   0  10  -3    3.80    4.80 
   0 -10   3   -1.00    4.10 
   0 -10   3    1.80    4.80 
  -1  10  -3   -5.00    4.80 
  -1  10  -3   -6.60    2.80 
  -1  10  -3    4.40    3.70 
   1 -10   3   -1.10    3.50 
   1 -10   3    6.30    4.80 
  -2  10  -3   -2.20    4.60 
  -2  10  -3    3.90    3.50 
   2 -10   3   -5.10    3.70 
   2 -10   3    6.00    4.20 
   3 -10   3    8.10    5.00 
   3 -10   3    8.90    4.60 
  -4  10  -3   -1.30    2.90 
   4 -10   3   -0.10    5.40 
  -5  10  -3    4.50    4.40 
   6   9  -3   12.30    8.10 
  -6  -9   3    4.10    5.90 
   5   9  -3   15.20    6.50 
  -5  -9   3    8.40    4.70 
   4   9  -3    8.80    6.30 
  -4  -9   3    2.40    4.20 
   3   9  -3   18.50    8.30 
   3   9  -3   32.00    7.90 
  -3  -9   3    9.20    4.00 
  -3  -9   3   10.40    5.50 
   2   9  -3    5.20    3.00 
   2   9  -3    6.40    5.40 
   2   9  -3    0.90    4.60 
  -2  -9   3   -1.70    3.20 
  -2  -9   3   -1.50    3.50 
   1   9  -3   -1.80    3.60 
   1   9  -3   -1.20    3.70 
   1   9  -3    1.40    3.80 
  -1  -9   3   -0.50    3.80 
  -1  -9   3   -2.40    2.70 
  -1  -9   3   -3.30    2.40 
   0   9  -3   12.30    4.10 
   0   9  -3   12.40    4.10 
   0   9  -3   17.80    7.40 
   0  -9   3    6.00    4.60 
   0  -9   3   17.80    5.00 
  -1   9  -3    1.80    2.80 
  -1   9  -3   -0.50    4.00 
  -1   9  -3    2.40    3.30 
   1  -9   3   -0.90    3.20 
   1  -9   3    4.60    3.40 
  -2   9  -3    5.10    3.50 
  -2   9  -3    5.40    3.90 
   2  -9   3    3.00    3.40 
   2  -9   3   -3.50    6.40 
   2  -9   3    4.20    3.80 
  -3   9  -3   -3.80    3.00 
  -3   9  -3    1.60    2.60 
  -3   9  -3   -7.70    3.60 
   3  -9   3   -2.00    3.80 
   3  -9   3   -0.50    3.50 
  -4   9  -3   58.89    9.60 
  -4   9  -3   45.20    7.70 
  -4   9  -3   40.40    8.40 
   4  -9   3   63.39   10.30 
   4  -9   3   38.40    9.40 
   4  -9   3   41.50   10.60 
   5  -9   3   -3.40    4.10 
  -6   9  -3    3.60    4.00 
   6  -9   3    8.60    5.10 
   6   8  -3   -4.70    5.20 
  -6  -8   3   -2.10    4.00 
   5   8  -3   12.20    6.10 
  -5  -8   3    4.50    4.10 
   4   8  -3   34.90    7.90 
  -4  -8   3   29.30    7.40 
  -4  -8   3   25.70    6.30 
   3   8  -3    6.50    4.80 
  -3  -8   3    0.10    3.10 
  -3  -8   3    0.80    3.40 
   2   8  -3   24.50    7.30 
   2   8  -3   17.90    4.20 
  -2  -8   3   41.30    7.30 
  -2  -8   3   30.40    7.40 
  -2  -8   3   32.70    4.70 
   1   8  -3    0.50    3.30 
   1   8  -3    1.50    3.70 
  -1  -8   3    5.80    3.30 
  -1  -8   3    2.70    3.40 
   0   8  -3   10.30    3.10 
   0   8  -3    1.20    3.60 
   0   8  -3    6.40    4.90 
   0   8  -3    8.30    3.10 
   0  -8   3   11.50    4.60 
   0  -8   3    5.90    2.30 
   0  -8   3    3.50    3.00 
   0  -8   3    3.40    4.00 
  -1   8  -3    3.30    4.10 
  -1   8  -3    3.60    2.80 
  -1   8  -3   -0.10    2.80 
   1  -8   3   -2.00    3.30 
   1  -8   3   -2.20    2.60 
  -2   8  -3  104.19   11.30 
  -2   8  -3  101.29   10.40 
  -2   8  -3  103.99    9.10 
   2  -8   3  120.59   12.40 
   2  -8   3  114.69   12.20 
   2  -8   3  107.79   10.90 
  -3   8  -3    3.80    3.00 
  -3   8  -3    7.90    4.10 
  -3   8  -3   16.10    5.30 
   3  -8   3   11.70    4.40 
   3  -8   3   12.90    6.10 
   3  -8   3   11.90    4.50 
  -4   8  -3   10.50    5.00 
  -4   8  -3    6.70    3.30 
  -4   8  -3    6.80    3.80 
   4  -8   3   10.70    5.10 
   4  -8   3    1.60    3.00 
   4  -8   3    5.30    5.10 
  -5   8  -3    1.80    3.30 
  -5   8  -3    6.20    3.10 
   5  -8   3    6.20    5.10 
   5  -8   3   -1.10    3.30 
  -6   8  -3   -2.10    3.00 
  -6   8  -3   -2.00    2.70 
   6  -8   3   -6.30    5.60 
   6  -8   3   -1.10    3.00 
  -7   8  -3    0.50    3.00 
   7  -8   3    6.70    4.20 
  -7  -7   3    1.30    3.20 
   6   7  -3    0.50    4.70 
   6   7  -3   11.00    5.20 
  -6  -7   3    1.70    3.20 
   5   7  -3    8.00    4.30 
   5   7  -3   11.00    5.60 
  -5  -7   3    0.30    3.20 
  -5  -7   3    7.70    4.40 
   4   7  -3    3.70    4.20 
   4   7  -3    4.80    4.80 
  -4  -7   3    1.20    3.40 
  -4  -7   3    3.90    3.30 
   3   7  -3   -4.10    2.80 
   3   7  -3    8.10    4.50 
  -3  -7   3   -0.70    2.40 
  -3  -7   3   -1.00    2.60 
   2   7  -3   47.70    4.80 
   2   7  -3   30.30    7.20 
   2   7  -3   46.00    7.60 
  -2  -7   3   31.70    6.40 
  -2  -7   3   35.70    4.10 
  -2  -7   3   26.70    5.40 
   1   7  -3   68.99    7.70 
   1   7  -3   55.59    6.20 
  -1  -7   3   74.79    8.60 
  -1  -7   3   54.79    5.60 
  -1  -7   3   67.69   10.70 
  -1  -7   3   76.39    8.70 
   0   7  -3   16.10    4.30 
   0   7  -3    5.20    3.10 
   0   7  -3    9.00    4.00 
   0  -7   3    6.40    3.20 
   0  -7   3   11.50    4.40 
  -1   7  -3   12.80    3.70 
  -1   7  -3   16.80    3.50 
  -1   7  -3   15.50    4.90 
  -1   7  -3   14.40    4.10 
   1  -7   3   20.20    5.30 
   1  -7   3   12.60    2.80 
   1  -7   3   22.00    5.00 
   1  -7   3   22.80    6.10 
  -2   7  -3   47.20   10.90 
  -2   7  -3   43.20    8.10 
  -2   7  -3   39.70    5.40 
   2  -7   3   45.10    7.30 
   2  -7   3   39.80    6.30 
   2  -7   3   38.30    7.50 
  -3   7  -3    7.90    3.50 
  -3   7  -3    4.20    2.40 
  -3   7  -3    2.70    3.40 
   3  -7   3    0.50    2.50 
   3  -7   3    8.00    4.40 
   3  -7   3    2.50    3.40 
  -4   7  -3    5.00    2.60 
  -4   7  -3    5.40    3.00 
  -4   7  -3    2.40    3.60 
   4  -7   3   -3.30    3.20 
   4  -7   3    0.50    2.80 
   4  -7   3   -3.40    2.50 
  -5   7  -3   -0.40    1.90 
  -5   7  -3    2.50    3.10 
   5  -7   3    3.90    3.30 
   5  -7   3    1.50    3.40 
   5  -7   3    1.60    3.40 
  -6   7  -3    1.80    2.80 
  -6   7  -3    0.40    2.70 
   6  -7   3    2.00    4.80 
   6  -7   3    1.00    2.90 
   6  -7   3   -0.90    4.00 
  -7   7  -3   -1.60    2.70 
  -7   7  -3   -0.10    3.40 
   7  -7   3   15.00    7.00 
   7  -7   3    2.60    4.00 
   8   6  -3    5.00    5.50 
  -8  -6   3   10.20    4.70 
   7   6  -3   -5.70    4.30 
   7   6  -3    4.40    3.80 
  -7  -6   3    2.20    2.80 
   6   6  -3    2.90    4.10 
   6   6  -3   15.00    5.80 
  -6  -6   3    6.10    3.60 
   5   6  -3    0.00    3.30 
   5   6  -3   -0.60    2.90 
  -5  -6   3    0.00    2.50 
   4   6  -3    5.20    3.70 
   4   6  -3    9.20    4.40 
  -4  -6   3    5.60    2.70 
  -4  -6   3    6.10    4.30 
   3   6  -3   29.10    6.50 
   3   6  -3   30.50    5.90 
   3   6  -3   29.90    3.60 
  -3  -6   3   30.20    5.60 
  -3  -6   3   29.60    5.60 
   2   6  -3    4.50    1.90 
   2   6  -3   -0.70    2.00 
   2   6  -3    1.50    2.80 
   2   6  -3   -1.20    2.30 
  -2  -6   3    4.30    2.70 
  -2  -6   3   -1.70    1.40 
  -2  -6   3   -0.90    1.90 
   1   6  -3    5.80    2.80 
   1   6  -3   -3.50    2.50 
   1   6  -3    9.20    3.40 
  -1  -6   3    1.50    2.10 
  -1  -6   3    0.70    1.50 
  -1  -6   3    1.50    2.70 
  -1  -6   3    1.40    2.30 
   0   6  -3    4.20    2.90 
   0   6  -3    3.70    2.60 
   0  -6   3    0.60    2.20 
   0  -6   3    3.80    2.70 
   0  -6   3    1.60    1.60 
   0  -6   3    3.30    2.80 
  -1   6  -3    0.00    2.30 
  -1   6  -3    2.60    2.70 
  -1   6  -3    6.50    3.20 
  -1   6  -3   -1.00    2.00 
  -1   6  -3    2.40    2.60 
   1  -6   3    2.10    2.20 
   1  -6   3    3.50    2.60 
   1  -6   3    0.50    1.90 
   1  -6   3    0.10    3.00 
  -2   6  -3    4.10    2.50 
  -2   6  -3    1.40    2.40 
  -2   6  -3    5.30    2.20 
  -2   6  -3    3.80    2.40 
   2  -6   3    4.40    1.90 
   2  -6   3    3.70    3.10 
   2  -6   3    1.90    2.10 
  -3   6  -3   10.70    3.10 
  -3   6  -3    8.90    3.50 
  -3   6  -3    8.50    3.70 
   3  -6   3    8.70    3.90 
   3  -6   3   10.70    4.20 
  -4   6  -3   10.80    3.60 
  -4   6  -3    3.30    2.60 
  -4   6  -3    5.20    2.60 
   4  -6   3    7.50    3.60 
   4  -6   3    7.90    2.80 
  -5   6  -3    3.00    2.50 
  -5   6  -3    4.70    4.00 
   5  -6   3   -0.70    2.50 
   5  -6   3    2.40    3.30 
   5  -6   3    2.30    2.90 
  -6   6  -3    1.70    2.10 
  -6   6  -3    1.00    2.50 
   6  -6   3    0.20    3.80 
   6  -6   3   -1.90    2.40 
   6  -6   3    3.70    3.30 
  -7   6  -3   -3.70    2.50 
   7  -6   3    5.10    4.20 
   7  -6   3    1.30    4.10 
  -8   6  -3    2.50    3.80 
   8  -6   3   -3.80    3.10 
   8  -6   3   -2.40    6.70 
   8   5  -3   25.90    6.40 
   7   5  -3    2.30    3.90 
   7   5  -3    1.90    3.40 
   7   5  -3    7.40    4.10 
  -7  -5   3    1.20    2.20 
   6   5  -3   -6.30    2.80 
   6   5  -3    3.70    3.30 
   6   5  -3    3.80    3.00 
  -6  -5   3   -3.40    2.00 
  -6  -5   3    3.90    2.10 
   5   5  -3   23.90    5.70 
   5   5  -3   27.20    5.60 
   5   5  -3   26.90    4.20 
  -5  -5   3   23.10    3.50 
  -5  -5   3   32.30    4.40 
   4   5  -3    1.10    1.80 
   4   5  -3   -4.00    2.30 
   4   5  -3    0.30    2.90 
  -4  -5   3   -0.80    2.00 
  -4  -5   3    1.30    2.40 
  -4  -5   3    0.60    2.20 
   3   5  -3   10.00    2.40 
   3   5  -3   15.90    4.40 
   3   5  -3    8.10    3.30 
  -3  -5   3    4.80    2.80 
  -3  -5   3    5.50    2.30 
  -3  -5   3    9.70    2.10 
   2   5  -3   15.50    4.00 
   2   5  -3    8.40    3.40 
   2   5  -3    9.30    2.20 
  -2  -5   3   15.30    3.50 
  -2  -5   3   11.10    1.90 
  -2  -5   3    7.80    2.90 
  -2  -5   3    6.80    2.70 
   1   5  -3    1.10    2.50 
   1   5  -3    1.70    1.70 
   1   5  -3   -1.80    1.60 
   1   5  -3    2.40    2.00 
  -1  -5   3    1.30    2.10 
  -1  -5   3    0.10    1.00 
  -1  -5   3    0.00    1.90 
  -1  -5   3    0.70    1.60 
   0   5  -3    2.90    2.30 
   0   5  -3   -0.60    1.70 
   0   5  -3    2.00    2.40 
   0   5  -3    4.40    1.60 
   0  -5   3    1.90    1.30 
   0  -5   3    0.80    2.10 
   0  -5   3   -0.30    1.80 
   0  -5   3    2.00    2.30 
  -1   5  -3    0.90    2.00 
  -1   5  -3    3.20    2.00 
  -1   5  -3    0.30    1.50 
  -1   5  -3    0.40    1.30 
  -1   5  -3    1.80    1.70 
   1  -5   3    0.90    1.60 
   1  -5   3   -1.80    1.00 
   1  -5   3    0.10    2.00 
   1  -5   3    2.40    2.00 
  -2   5  -3   25.00    4.70 
  -2   5  -3   25.00    4.20 
  -2   5  -3   30.40    5.20 
  -2   5  -3   29.90    3.90 
  -2   5  -3   30.10    4.10 
   2  -5   3   26.70    5.20 
   2  -5   3   27.70    5.10 
   2  -5   3   25.60    3.70 
   2  -5   3   28.10    4.10 
  -3   5  -3   14.70    3.50 
  -3   5  -3   23.60    4.60 
  -3   5  -3   20.30    5.50 
  -3   5  -3   23.90    4.10 
   3  -5   3   16.70    4.00 
   3  -5   3   19.50    4.40 
   3  -5   3   21.10    3.90 
  -4   5  -3   25.20    4.40 
  -4   5  -3   22.80    4.80 
   4  -5   3   24.20    4.30 
   4  -5   3   25.60    4.90 
   4  -5   3   33.80    5.40 
  -5   5  -3    5.20    2.00 
  -5   5  -3    3.60    2.30 
   5  -5   3    3.60    2.30 
   5  -5   3    2.80    2.90 
   5  -5   3    1.70    2.30 
  -6   5  -3    2.50    2.10 
  -6   5  -3   -3.20    2.10 
   6  -5   3    1.90    2.80 
   6  -5   3    7.10    3.50 
  -7   5  -3    2.50    3.10 
   7  -5   3    2.00    3.00 
   7  -5   3    4.30    4.10 
   8  -5   3    0.30    2.80 
   8  -5   3   -8.60    5.00 
   9   4  -3    4.90    5.80 
  -9  -4   3    2.60    3.40 
   8   4  -3    1.30    4.30 
   8   4  -3    3.90    4.90 
  -8  -4   3   -3.60    2.90 
   7   4  -3    6.20    3.60 
   7   4  -3    6.60    3.50 
   7   4  -3    1.60    3.30 
  -7  -4   3    2.80    2.10 
   6   4  -3   13.10    4.20 
  -6  -4   3   15.40    4.70 
   5   4  -3    4.70    3.10 
   5   4  -3    2.80    2.80 
   5   4  -3    3.20    2.40 
  -5  -4   3   -1.50    1.60 
  -5  -4   3    1.90    1.80 
   4   4  -3   47.80    6.40 
   4   4  -3   52.89    6.00 
   4   4  -3   49.10    4.70 
  -4  -4   3   50.59    5.20 
  -4  -4   3   45.40    4.00 
   3   4  -3    5.80    2.20 
   3   4  -3    6.80    3.50 
  -3  -4   3    9.90    2.90 
  -3  -4   3    7.00    2.20 
  -3  -4   3   12.50    3.00 
  -3  -4   3   10.40    2.80 
   2   4  -3    0.90    1.90 
   2   4  -3    0.60    1.80 
   2   4  -3    0.70    1.20 
   2   4  -3   -0.40    1.30 
  -2  -4   3   -0.50    1.40 
  -2  -4   3    2.30    2.00 
  -2  -4   3    2.70    1.20 
   1   4  -3    6.60    1.90 
   1   4  -3    5.50    2.10 
   1   4  -3    4.70    2.40 
   1   4  -3    1.60    1.40 
  -1  -4   3    2.90    1.40 
  -1  -4   3    2.20    1.60 
  -1  -4   3   -0.40    1.50 
   0   4  -3    7.30    1.70 
   0   4  -3   10.50    2.70 
   0   4  -3    7.10    2.50 
   0   4  -3    5.80    2.10 
   0  -4   3    6.10    2.50 
   0  -4   3    5.70    1.50 
   0  -4   3    3.30    2.00 
   0  -4   3    7.20    2.40 
  -1   4  -3   53.29    5.20 
  -1   4  -3   59.29    4.30 
  -1   4  -3   51.39    4.70 
   1  -4   3   46.80    5.40 
   1  -4   3   46.10    4.00 
   1  -4   3   52.59    4.70 
   1  -4   3   51.19    5.00 
  -2   4  -3  154.98    8.80 
  -2   4  -3  161.78    8.70 
  -2   4  -3  156.48    9.20 
  -2   4  -3  161.78    9.30 
  -2   4  -3  166.88    8.70 
   2  -4   3  169.08    9.00 
   2  -4   3  164.38    9.90 
   2  -4   3  164.48    9.40 
  -3   4  -3   38.00    4.10 
  -3   4  -3   36.10    3.60 
  -3   4  -3   34.60    4.00 
  -3   4  -3   34.70    4.20 
  -3   4  -3   40.10    4.80 
   3  -4   3   36.50    4.70 
   3  -4   3   38.70    4.50 
   3  -4   3   31.40    3.90 
   3  -4   3   32.90    4.10 
  -4   4  -3  396.66   16.70 
  -4   4  -3  418.76   18.60 
   4  -4   3  397.06   17.30 
   4  -4   3  393.56   16.60 
   4  -4   3  418.96   18.80 
  -5   4  -3   10.50    3.50 
  -5   4  -3    8.80    2.60 
   5  -4   3    5.20    3.10 
   5  -4   3   12.40    2.40 
   5  -4   3   12.60    3.20 
  -6   4  -3   21.70    4.90 
   6  -4   3   30.50    4.40 
   6  -4   3   19.10    4.40 
  -7   4  -3   -2.40    2.20 
   7  -4   3    4.70    2.50 
  -8   4  -3    1.20    3.30 
   8  -4   3    0.80    3.00 
  -9   4  -3   -2.00    3.20 
   9   3  -3    3.80    6.60 
  -9  -3   3   -0.80    3.80 
   8   3  -3   11.50    4.70 
  -8  -3   3    1.50    2.80 
   7   3  -3   -4.20    2.60 
   6   3  -3    3.30    2.70 
   6   3  -3    3.60    2.80 
   6   3  -3    0.20    2.10 
  -6  -3   3    2.00    2.00 
   5   3  -3   -1.30    2.30 
   5   3  -3    5.40    2.70 
   5   3  -3    3.20    2.60 
  -5  -3   3    4.70    2.20 
  -5  -3   3    2.10    1.80 
   4   3  -3   45.60    4.70 
   4   3  -3   47.20    5.10 
   4   3  -3   49.00    5.40 
   4   3  -3   48.60    4.20 
  -4  -3   3   40.20    4.30 
  -4  -3   3   41.90    4.00 
   3   3  -3  146.49    7.10 
   3   3  -3  139.59    7.50 
   3   3  -3  144.59    8.60 
   3   3  -3  143.19    8.40 
  -3  -3   3  136.49    6.30 
  -3  -3   3  143.99    7.80 
  -3  -3   3  142.99    7.70 
  -3  -3   3  134.69    7.60 
   2   3  -3    7.70    1.70 
   2   3  -3    9.00    2.30 
   2   3  -3    5.90    2.30 
  -2  -3   3    6.50    1.90 
  -2  -3   3    8.90    2.40 
  -2  -3   3    7.70    2.40 
  -2  -3   3    9.70    3.10 
   1   3  -3    6.10    1.70 
   1   3  -3    5.10    1.90 
   1   3  -3    7.50    2.00 
  -1  -3   3    4.10    1.80 
  -1  -3   3    4.30    1.60 
   0   3  -3   15.70    2.00 
   0   3  -3   20.00    3.30 
   0   3  -3   15.70    3.30 
   0   3  -3   18.90    3.20 
   0  -3   3   16.60    2.90 
   0  -3   3   16.80    2.00 
   0  -3   3   18.20    2.90 
   0  -3   3   15.30    3.10 
  -1   3  -3  163.18    7.50 
  -1   3  -3  153.18    7.90 
  -1   3  -3  160.48    8.50 
   1  -3   3  150.88    8.60 
   1  -3   3  160.28    8.30 
   1  -3   3  164.58    7.60 
   1  -3   3  152.28    7.80 
  -2   3  -3    1.80    1.20 
  -2   3  -3    1.80    1.30 
  -2   3  -3    2.00    1.60 
  -2   3  -3    2.90    1.30 
  -2   3  -3    0.90    1.40 
   2  -3   3    2.30    1.30 
   2  -3   3    1.80    1.40 
   2  -3   3    0.10    1.00 
  -3   3  -3  133.49    7.10 
  -3   3  -3  133.69    8.50 
  -3   3  -3  128.69    7.90 
   3  -3   3  143.59    8.40 
   3  -3   3  130.29    7.30 
   3  -3   3  141.69    8.20 
   3  -3   3  139.69    7.10 
  -4   3  -3  248.28   10.90 
  -4   3  -3  232.58   13.50 
  -4   3  -3  255.57   13.10 
   4  -3   3  260.57   12.20 
   4  -3   3  263.67   10.50 
   4  -3   3  261.97   11.50 
  -5   3  -3   27.90    4.90 
  -6   3  -3   68.29    7.60 
  -7   3  -3    1.20    2.70 
  -8   3  -3    2.50    3.20 
  -9   3  -3   -1.40    4.40 
   9   2  -3   -8.10    5.30 
  -9  -2   3    4.30    3.50 
   8   2  -3    5.40    4.00 
  -8  -2   3    0.40    2.90 
   7   2  -3    1.70    3.00 
   6   2  -3   38.00    5.60 
  -6  -2   3   29.90    4.40 
   5   2  -3    2.30    2.80 
  -5  -2   3    7.50    2.20 
   4   2  -3  130.69    7.50 
   4   2  -3  137.19    7.90 
  -4  -2   3  127.39    7.10 
  -4  -2   3  134.59    6.80 
   3   2  -3  103.59    5.80 
   3   2  -3   97.19    6.00 
   3   2  -3   93.79    5.30 
  -3  -2   3  100.29    5.30 
  -3  -2   3  101.79    5.50 
   2   2  -3  235.78   10.50 
   2   2  -3  226.88   10.20 
   2   2  -3  238.08    9.90 
   2   2  -3  249.28    9.30 
  -2  -2   3  254.57   10.30 
  -2  -2   3  236.18   10.10 
  -2  -2   3  246.98    8.90 
  -2  -2   3  255.07   10.10 
   1   2  -3  798.02   23.20 
   1   2  -3  694.53   25.20 
   1   2  -3  708.73   25.00 
  -1  -2   3  821.72   23.30 
  -1  -2   3  696.33   25.10 
  -1  -2   3  718.93   25.00 
  -1  -2   3  678.03   24.40 
   0   2  -3    3.20    1.40 
   0   2  -3    1.80    1.40 
   0   2  -3    4.80    1.50 
   0   2  -3    3.10    1.00 
   0  -2   3    2.80    1.80 
   0  -2   3    3.90    1.40 
   0  -2   3    4.80    1.10 
   0  -2   3    3.50    1.50 
  -1   2  -3  343.17   12.80 
  -1   2  -3  352.96   13.20 
  -1   2  -3  354.46   12.70 
  -1   2  -3  331.17   12.70 
   1  -2   3  338.77   13.00 
   1  -2   3  351.76   12.80 
  -2   2  -3  362.66   13.30 
  -2   2  -3  365.26   14.20 
  -2   2  -3  367.66   12.80 
  -2   2  -3  356.46   14.60 
  -2   2  -3  367.16   13.00 
   2  -2   3  381.76   14.50 
   2  -2   3  363.46   13.30 
   2  -2   3  364.06   13.40 
   2  -2   3  359.86   13.80 
  -3   2  -3    1.20    1.00 
  -3   2  -3    0.90    1.30 
  -3   2  -3   -1.10    1.00 
   3  -2   3    1.80    1.20 
  -4   2  -3   19.80    5.80 
  -5   2  -3    8.90    3.10 
  -6   2  -3   -3.30    1.80 
  -7   2  -3    6.40    3.30 
  -8   2  -3   -1.70    2.90 
  -9   2  -3   -2.30    2.80 
   9   1  -3   -5.80    3.70 
  -9  -1   3   -1.10    3.20 
   8   1  -3   15.80    5.30 
   7   1  -3    9.20    4.20 
  -7  -1   3    5.10    3.00 
   6   1  -3   25.10    5.20 
  -6  -1   3   34.30    6.00 
   5   1  -3   18.20    4.00 
  -5  -1   3   15.80    3.40 
   4   1  -3    0.50    1.70 
  -4  -1   3    1.10    1.60 
   3   1  -3  117.79    6.60 
  -3  -1   3  116.99    5.30 
  -3  -1   3  122.89    6.40 
   2   1  -3   34.40    3.00 
   2   1  -3   36.60    2.90 
   2   1  -3   35.10    3.00 
   2   1  -3   39.60    2.70 
  -2  -1   3   34.30    2.80 
  -2  -1   3   33.20    2.50 
   1   1  -3   29.30    2.50 
   1   1  -3   30.50    2.20 
  -1  -1   3   32.80    2.60 
  -1  -1   3   28.80    2.20 
  -1  -1   3   28.10    2.50 
  -1  -1   3   34.90    2.00 
   0   1  -3    1.20    0.80 
   0   1  -3    3.30    0.90 
   0  -1   3    1.40    1.10 
   0  -1   3    2.70    0.80 
   0  -1   3    1.40    0.60 
   0  -1   3    0.70    0.70 
  -1   1  -3    5.20    1.10 
  -1   1  -3    5.60    1.10 
  -1   1  -3    5.00    1.20 
  -1   1  -3    4.10    1.00 
   1  -1   3    4.60    1.10 
   1  -1   3    2.70    0.90 
   1  -1   3    6.40    1.10 
   1  -1   3    5.00    1.20 
  -2   1  -3  110.99    5.70 
  -2   1  -3  108.89    6.00 
   2  -1   3  102.29    5.60 
  -3   1  -3  532.65   19.60 
  -3   1  -3  521.25   20.10 
   3  -1   3  529.85   20.10 
  -4   1  -3   27.60    3.60 
  -4   1  -3   23.80    4.10 
   4  -1   3   33.90    4.30 
  -5   1  -3   13.50    3.50 
  -5   1  -3   11.90    3.30 
   5  -1   3    4.20    3.00 
  -6   1  -3    7.60    3.00 
  -7   1  -3   11.70    3.90 
  -8   1  -3    5.00    3.50 
  -9   1  -3    6.70    4.80 
   9   0  -3   -0.60    4.20 
  -9   0   3    4.10    3.90 
   8   0  -3    7.20    4.40 
  -8   0   3    7.90    4.00 
   7   0  -3   30.60    6.30 
  -7   0   3   32.70    6.20 
   6   0  -3    6.40    3.40 
   5   0  -3    4.20    2.40 
  -5   0   3   -2.60    1.80 
   4   0  -3   44.70    5.00 
  -4   0   3   42.30    4.50 
   3   0  -3   87.99    5.90 
  -3   0   3   88.39    5.60 
   2   0  -3  110.79    5.90 
  -2   0   3  112.19    5.80 
   1   0  -3   31.80    2.10 
   1   0  -3   32.00    1.90 
   1   0  -3   36.10    3.00 
  -1   0   3   35.90    2.40 
  -1   0   3   31.40    2.00 
  -1   0   3   37.90    2.40 
  -1   0   3   32.80    2.00 
   0   0  -3   -0.10    0.30 
   0   0   3    0.20    0.20 
   0   0   3    0.20    0.10 
  -1   0  -3   58.39    2.70 
  -1   0  -3   56.79    2.40 
   1   0   3   55.49    2.70 
   1   0   3   56.89    2.40 
  -2   0  -3  374.16   13.60 
  -2   0  -3  362.46   13.10 
   2   0   3  369.56   13.50 
  -3   0  -3   18.50    2.80 
  -3   0  -3   15.70    2.30 
   3   0   3   14.20    2.60 
  -4   0  -3   10.40    2.80 
  -4   0  -3    5.50    2.20 
   4   0   3    8.70    2.70 
  -5   0  -3    4.00    2.20 
  -5   0  -3    4.80    2.90 
   5   0   3    4.40    2.60 
  -6   0  -3   -1.10    3.50 
  -6   0  -3    2.50    2.20 
   6   0   3    5.00    3.30 
  -7   0  -3    2.20    2.30 
  -8   0  -3    1.20    2.60 
  -9   0  -3    7.20    3.30 
   9  -1  -3   -1.10    5.10 
  -9   1   3    3.40    3.70 
   8  -1  -3    0.20    3.10 
  -8   1   3    0.80    2.60 
   7  -1  -3    2.50    3.40 
  -7   1   3   -0.90    2.60 
   6  -1  -3   -0.30    2.80 
  -6   1   3    0.70    2.10 
   5  -1  -3    0.00    2.30 
  -5   1   3   -1.30    1.90 
   4  -1  -3  404.96   18.00 
  -4   1   3  397.36   17.30 
   3  -1  -3   -1.30    1.00 
  -3   1   3   -0.40    1.20 
   2  -1  -3  324.07   11.20 
   2  -1  -3  333.47   11.40 
   2  -1  -3  340.07   13.30 
   2  -1  -3  323.27   11.40 
   2  -1  -3  322.47   12.00 
  -2   1   3  330.67   13.10 
  -2   1   3  328.57   11.40 
   1  -1  -3   13.10    1.60 
   1  -1  -3   12.10    1.90 
   1  -1  -3   11.70    1.40 
  -1   1   3   10.00    1.40 
  -1   1   3   10.40    1.80 
  -1   1   3   13.90    1.70 
  -1   1   3   11.40    1.40 
  -1   1   3   11.20    1.90 
   0  -1  -3   20.50    2.60 
   0  -1  -3   25.90    1.90 
   0  -1  -3   23.20    1.80 
   0   1   3   27.40    1.90 
   0   1   3   25.70    2.70 
   0   1   3   22.30    1.80 
   0   1   3   18.20    1.30 
  -1  -1  -3   31.30    2.20 
  -1  -1  -3   33.40    2.20 
  -1  -1  -3   32.50    2.60 
  -1  -1  -3   34.90    2.20 
   1   1   3   33.50    2.70 
   1   1   3   30.40    2.10 
  -2  -1  -3 3576.84  107.39 
  -2  -1  -3 3598.84  107.59 
  -2  -1  -3 3557.74  108.19 
   2   1   3 3501.35  106.99 
  -3  -1  -3    3.50    1.50 
  -3  -1  -3    1.60    1.10 
   3   1   3    2.30    1.30 
  -4  -1  -3 2194.88   69.79 
  -4  -1  -3 2186.58   69.49 
   4   1   3 2219.38   69.99 
  -5  -1  -3    7.90    2.30 
  -5  -1  -3    4.20    2.00 
   5   1   3    0.80    2.10 
  -6  -1  -3   10.10    3.10 
  -6  -1  -3    6.40    2.60 
   6   1   3   10.10    3.40 
  -7  -1  -3   -2.10    2.00 
  -8  -1  -3    6.60    3.40 
  -9  -1  -3   -4.00    2.90 
   9  -2  -3    1.70    5.00 
  -9   2   3    3.00    2.90 
   8  -2  -3   -0.70    4.50 
  -8   2   3    4.80    3.60 
  -7   2   3   -0.50    2.10 
   6  -2  -3   12.10    4.50 
  -6   2   3   11.00    4.00 
   5  -2  -3    1.40    2.50 
  -5   2   3    4.10    2.30 
   4  -2  -3  188.88   13.40 
  -4   2   3  194.18   11.20 
   3  -2  -3   58.89    5.40 
   3  -2  -3   56.39    4.50 
   3  -2  -3   59.99    3.50 
   3  -2  -3   59.19    3.90 
   3  -2  -3   58.39    3.80 
  -3   2   3   61.89    3.80 
  -3   2   3   58.59    5.10 
   2  -2  -3    4.20    1.40 
   2  -2  -3    5.90    1.70 
   2  -2  -3   10.70    2.60 
   2  -2  -3    3.50    1.60 
   2  -2  -3    6.40    1.60 
  -2   2   3    7.70    1.70 
  -2   2   3    3.30    1.50 
  -2   2   3    4.40    1.40 
  -2   2   3    4.00    1.90 
   1  -2  -3   61.79    4.70 
   1  -2  -3   64.69    4.20 
   1  -2  -3   64.59    4.30 
  -1   2   3   61.59    4.50 
  -1   2   3   62.99    3.90 
  -1   2   3   70.29    4.20 
  -1   2   3   55.09    4.70 
   0  -2  -3   15.30    2.10 
   0  -2  -3   14.20    1.70 
   0  -2  -3   14.00    2.40 
   0  -2  -3   17.80    2.90 
   0   2   3   15.20    2.30 
   0   2   3   18.40    2.20 
   0   2   3   15.30    3.20 
   0   2   3   14.00    1.70 
   0   2   3   14.60    1.50 
  -1  -2  -3   92.99    5.00 
  -1  -2  -3   89.59    5.60 
  -1  -2  -3   95.99    5.20 
   1   2   3   90.29    4.90 
   1   2   3   96.99    5.80 
  -2  -2  -3  224.58    9.50 
  -2  -2  -3  226.18    9.20 
  -2  -2  -3  232.28    9.40 
   2   2   3  234.08   10.20 
   2   2   3  231.28    9.10 
   2   2   3  230.28    9.60 
  -3  -2  -3   24.60    2.40 
  -3  -2  -3   23.60    2.50 
   3   2   3   21.10    2.20 
   3   2   3   23.10    2.50 
   3   2   3   22.80    2.60 
   3   2   3   22.60    3.10 
  -4  -2  -3  208.18    9.40 
  -4  -2  -3  211.58    9.60 
   4   2   3  205.78    9.70 
  -5  -2  -3   -1.30    1.50 
  -5  -2  -3   -1.60    1.20 
   5   2   3    1.90    2.00 
  -6  -2  -3   87.59    8.60 
  -6  -2  -3   94.59    8.50 
   6   2   3   83.89    8.00 
  -7  -2  -3    1.50    2.00 
  -8  -2  -3    4.20    2.60 
  -9   3   3    0.70    3.80 
   8  -3  -3    4.30    4.40 
  -8   3   3   -1.30    2.20 
   7  -3  -3   14.80    5.20 
  -7   3   3   11.30    4.00 
   6  -3  -3   86.09    9.90 
  -6   3   3   89.99    9.00 
   5  -3  -3    2.60    3.00 
   5  -3  -3    1.70    2.30 
   5  -3  -3    1.40    1.90 
  -5   3   3    3.50    2.40 
   4  -3  -3   90.59    7.80 
   4  -3  -3   83.49    5.50 
   4  -3  -3   82.29    5.00 
   4  -3  -3   82.99    6.60 
   4  -3  -3   83.39    5.90 
  -4   3   3   87.19    5.40 
  -4   3   3   89.59    7.40 
  -4   3   3   81.39    7.00 
   3  -3  -3   10.50    3.30 
   3  -3  -3    7.20    2.20 
   3  -3  -3    7.70    2.10 
   3  -3  -3    9.90    2.10 
   3  -3  -3    5.50    2.60 
  -3   3   3   13.60    2.30 
  -3   3   3    6.80    2.50 
  -3   3   3    8.30    2.40 
  -3   3   3   11.20    2.50 
  -3   3   3    6.90    2.00 
   2  -3  -3  410.06   15.80 
   2  -3  -3  416.66   16.30 
   2  -3  -3  420.96   17.00 
  -2   3   3  427.46   17.00 
  -2   3   3  405.86   15.90 
  -2   3   3  428.46   16.90 
  -2   3   3  427.86   16.70 
  -2   3   3  425.66   15.70 
   1  -3  -3  168.58    7.90 
   1  -3  -3  160.48    8.90 
   1  -3  -3  173.28    8.40 
   1  -3  -3  157.58    7.80 
   1  -3  -3  166.48    8.20 
  -1   3   3  165.38    8.90 
  -1   3   3  161.38    7.60 
  -1   3   3  165.28    8.00 
  -1   3   3  163.28    7.90 
  -1   3   3  156.58    8.00 
   0  -3  -3    9.20    2.90 
   0  -3  -3    7.00    2.00 
   0   3   3   10.40    2.70 
   0   3   3    7.90    2.00 
   0   3   3    7.10    1.30 
   0   3   3    7.00    2.00 
   0   3   3    7.20    1.60 
  -1  -3  -3   28.60    3.10 
  -1  -3  -3   23.30    3.10 
  -1  -3  -3   25.50    3.70 
   1   3   3   26.60    3.30 
   1   3   3   28.70    3.70 
   1   3   3   28.40    3.00 
  -2  -3  -3  458.95   17.60 
  -2  -3  -3  455.35   18.10 
  -2  -3  -3  471.65   17.70 
   2   3   3  472.05   18.80 
   2   3   3  462.25   17.30 
  -3  -3  -3  306.67   12.70 
   3   3   3  302.97   13.00 
   3   3   3  294.67   13.60 
   3   3   3  282.87   12.10 
  -4  -3  -3    1.80    1.50 
  -4  -3  -3    1.60    1.60 
   4   3   3    2.70    2.20 
   4   3   3   -0.10    1.10 
   4   3   3    0.20    2.10 
  -5  -3  -3    3.60    2.00 
  -5  -3  -3    4.50    1.90 
  -5  -3  -3    2.20    1.50 
   5   3   3    1.70    2.40 
   5   3   3    1.50    2.00 
   5   3   3    3.60    2.30 
  -6  -3  -3   29.10    4.60 
  -6  -3  -3   17.50    3.40 
   6   3   3   33.10    4.70 
   6   3   3   39.60    5.90 
   6   3   3   22.00    4.40 
  -7  -3  -3   -0.10    2.20 
  -7  -3  -3    0.30    1.90 
  -8  -3  -3    3.30    3.90 
  -9  -3  -3   -3.90    3.60 
  -9   4   3   -2.20    3.00 
  -8   4   3    1.90    3.30 
   7  -4  -3    6.00    4.10 
   7  -4  -3    0.00    2.70 
   7  -4  -3    6.00    4.80 
  -7   4   3    7.80    3.50 
   6  -4  -3   -2.50    2.30 
   6  -4  -3   -1.50    2.50 
   6  -4  -3    2.10    2.30 
  -6   4   3    2.10    2.50 
   5  -4  -3   10.10    3.90 
   5  -4  -3   10.00    2.50 
   5  -4  -3   15.40    3.50 
   5  -4  -3   15.70    4.80 
  -5   4   3   16.60    3.10 
  -5   4   3    6.60    3.20 
   4  -4  -3    1.20    1.90 
   4  -4  -3   -0.60    1.60 
   4  -4  -3   -2.30    2.10 
   4  -4  -3    2.80    2.40 
  -4   4   3    1.80    2.00 
  -4   4   3   -0.30    1.40 
   3  -4  -3   25.30    4.00 
   3  -4  -3   30.10    4.40 
   3  -4  -3   24.40    3.40 
   3  -4  -3   23.70    3.00 
  -3   4   3   22.70    4.00 
  -3   4   3   22.60    3.00 
  -3   4   3   26.50    3.80 
  -3   4   3   22.50    4.20 
  -3   4   3   24.70    3.30 
   2  -4  -3  256.97   13.40 
   2  -4  -3  277.67   12.80 
   2  -4  -3  260.07   11.80 
   2  -4  -3  271.97   12.70 
  -2   4   3  262.57   12.10 
  -2   4   3  256.37   11.80 
  -2   4   3  260.97   13.10 
  -2   4   3  250.37   12.40 
  -2   4   3  264.77   12.20 
   1  -4  -3  276.87   13.00 
   1  -4  -3  288.67   14.00 
   1  -4  -3  275.17   12.40 
  -1   4   3  242.28   18.20 
  -1   4   3  268.47   12.50 
  -1   4   3  268.87   12.50 
  -1   4   3  294.57   11.80 
  -1   4   3  279.17   12.10 
   0  -4  -3   68.49    5.70 
   0  -4  -3   71.59    6.00 
   0  -4  -3   65.49    6.50 
   0   4   3   73.29    5.80 
   0   4   3   67.79    6.40 
   0   4   3   62.49    4.50 
   0   4   3   70.89    5.60 
   0   4   3   71.09    4.20 
  -1  -4  -3  121.49    8.40 
  -1  -4  -3  130.89    7.80 
  -1  -4  -3  124.99    7.90 
   1   4   3  115.29    7.70 
   1   4   3  128.19    7.60 
   1   4   3  122.19    8.60 
  -2  -4  -3  173.18    9.70 
  -2  -4  -3  190.98    9.90 
  -2  -4  -3  171.68   10.10 
   2   4   3  176.18   10.70 
   2   4   3  171.98    9.30 
  -3  -4  -3   38.90    4.70 
  -3  -4  -3   50.89    4.80 
  -3  -4  -3   41.50    4.60 
   3   4   3   45.10    5.80 
   3   4   3   40.10    4.10 
  -4  -4  -3    3.60    2.00 
   4   4   3    3.20    2.60 
   4   4   3    5.20    2.90 
  -5  -4  -3    2.90    2.00 
  -5  -4  -3    0.00    2.00 
   5   4   3    2.30    2.80 
   5   4   3    1.90    2.40 
  -6  -4  -3    4.00    2.10 
  -6  -4  -3    2.40    1.50 
  -7  -4  -3    2.80    2.10 
  -7  -4  -3   -0.30    2.80 
   7   4   3    1.60    3.30 
  -8  -4  -3    2.00    3.40 
   8   4   3    4.80    4.60 
   8   4   3   -2.40    3.70 
   8  -5  -3   -3.30    6.00 
  -8   5   3    6.10    3.90 
   7  -5  -3    8.00    4.60 
  -7   5   3    0.60    3.10 
   6  -5  -3   11.80    3.80 
   6  -5  -3    9.00    4.40 
   6  -5  -3    9.70    3.10 
   6  -5  -3    9.30    4.10 
   5  -5  -3    0.30    2.70 
   5  -5  -3    2.90    2.30 
   5  -5  -3    1.20    2.50 
  -5   5   3    2.60    1.70 
  -5   5   3    1.50    2.00 
   4  -5  -3    7.00    2.30 
   4  -5  -3    3.90    2.70 
   4  -5  -3   15.20    4.00 
   4  -5  -3    5.40    3.30 
  -4   5   3    7.40    2.90 
  -4   5   3    6.10    3.10 
  -4   5   3   10.90    3.50 
   3  -5  -3   55.19    5.00 
   3  -5  -3   54.99    6.50 
   3  -5  -3   51.29    6.20 
  -3   5   3   53.49    6.10 
  -3   5   3   51.29    5.70 
  -3   5   3   45.30    5.00 
  -3   5   3   50.69    5.50 
   2  -5  -3   13.10    3.40 
   2  -5  -3   21.80    4.80 
   2  -5  -3   25.40    4.40 
  -2   5   3   18.20    3.50 
  -2   5   3   24.70    4.40 
  -2   5   3   19.90    3.70 
  -2   5   3   21.80    4.70 
  -2   5   3   17.50    3.70 
   1  -5  -3   13.70    3.30 
   1  -5  -3   13.00    3.20 
   1  -5  -3   17.60    4.40 
   1  -5  -3   14.40    3.80 
  -1   5   3   13.90    3.10 
  -1   5   3   13.70    4.00 
  -1   5   3   14.70    3.20 
  -1   5   3   14.20    2.70 
  -1   5   3   14.40    4.10 
   0  -5  -3    8.70    3.30 
   0  -5  -3   10.50    3.10 
   0  -5  -3    8.20    2.80 
   0   5   3    5.60    2.80 
   0   5   3    5.30    2.50 
   0   5   3    4.60    1.60 
   0   5   3    4.70    2.00 
   0   5   3    6.00    2.40 
  -1  -5  -3    1.90    2.50 
  -1  -5  -3    7.20    2.70 
  -1  -5  -3    5.20    2.70 
   1   5   3    5.80    2.80 
   1   5   3    7.60    2.90 
   1   5   3    4.70    2.50 
  -2  -5  -3   -0.40    1.70 
  -2  -5  -3    2.30    2.30 
   2   5   3    1.00    2.50 
   2   5   3   -0.90    1.70 
  -3  -5  -3   19.70    4.20 
  -3  -5  -3   15.40    3.60 
   3   5   3   16.20    4.60 
  -4  -5  -3   -2.20    2.00 
  -4  -5  -3    0.90    2.00 
   4   5   3   -0.60    2.70 
  -5  -5  -3   -0.60    1.80 
  -5  -5  -3   -3.20    2.20 
   5   5   3    3.60    3.20 
  -6  -5  -3   -2.10    2.20 
  -6  -5  -3    2.80    2.90 
   6   5   3   -0.30    3.40 
   7   5   3    1.60    4.90 
   7   5   3    2.10    4.10 
   8  -6  -3    1.30    3.50 
   8  -6  -3    5.20    7.70 
  -8   6   3   -1.20    3.70 
   7  -6  -3    5.00    4.20 
   7  -6  -3    1.10    2.80 
  -7   6   3   -0.60    2.80 
   6  -6  -3   14.50    5.30 
   6  -6  -3   12.20    3.80 
  -6   6   3    4.90    3.10 
  -6   6   3    7.70    3.00 
   5  -6  -3    7.00    2.80 
   5  -6  -3    1.60    3.10 
  -5   6   3   -1.70    1.60 
  -5   6   3    0.90    1.70 
   4  -6  -3   -0.90    1.80 
   4  -6  -3    2.50    2.30 
  -4   6   3    1.00    2.30 
  -4   6   3    4.30    2.50 
   3  -6  -3   14.40    3.60 
   3  -6  -3   14.50    4.40 
   3  -6  -3   16.60    5.00 
  -3   6   3   17.10    4.90 
  -3   6   3   17.00    4.00 
  -3   6   3   13.00    3.60 
   2  -6  -3    1.70    3.10 
   2  -6  -3    4.80    2.60 
   2  -6  -3    5.30    3.00 
   2  -6  -3    7.10    2.90 
  -2   6   3    2.30    2.60 
  -2   6   3    4.90    3.50 
  -2   6   3    3.90    2.70 
  -2   6   3    8.90    2.90 
  -2   6   3    8.10    2.80 
   1  -6  -3    3.80    3.20 
   1  -6  -3    3.90    2.00 
   1  -6  -3    2.40    2.30 
  -1   6   3   -1.80    1.90 
  -1   6   3    2.40    2.00 
  -1   6   3    3.90    2.70 
  -1   6   3   -1.20    1.80 
   0  -6  -3    4.20    2.20 
   0  -6  -3    4.90    3.00 
   0  -6  -3    4.50    3.50 
   0   6   3    6.80    2.70 
   0   6   3    8.00    2.40 
   0   6   3    9.10    2.10 
   0   6   3    3.10    3.30 
   0   6   3    7.30    3.00 
  -1  -6  -3    1.50    2.20 
  -1  -6  -3   -4.00    1.90 
  -1  -6  -3    1.30    2.70 
   1   6   3   -0.90    1.30 
   1   6   3    1.90    2.70 
   1   6   3   -0.60    2.50 
   1   6   3    0.10    1.80 
   1   6   3    4.50    2.40 
  -2  -6  -3    3.70    2.60 
  -2  -6  -3    1.30    2.40 
   2   6   3    1.40    3.00 
   2   6   3    3.30    3.10 
   2   6   3    1.80    2.10 
  -3  -6  -3    7.40    3.20 
  -3  -6  -3    3.20    2.80 
   3   6   3    5.00    3.70 
   3   6   3    6.20    3.90 
  -4  -6  -3   35.50    5.50 
  -4  -6  -3   18.10    4.50 
  -4  -6  -3   19.80    4.60 
   4   6   3    8.90    4.40 
  -5  -6  -3    1.40    2.30 
  -5  -6  -3   -4.20    2.40 
   5   6   3   -0.40    3.40 
   5   6   3    2.20    3.90 
  -6  -6  -3   12.00    4.50 
  -6  -6  -3   12.50    4.60 
   6   6   3   11.90    5.80 
   6   6   3    8.80    4.80 
  -7  -6  -3   -0.80    2.80 
  -7  -6  -3   -2.50    4.00 
   7   6   3    2.00    4.00 
   7   6   3   12.70    6.60 
   8   6   3    8.90    5.90 
  -8   7   3   -2.70    3.10 
   7  -7  -3    2.30    3.70 
   7  -7  -3    0.70    5.90 
  -7   7   3    2.00    2.80 
   6  -7  -3    6.60    4.20 
   6  -7  -3   -0.50    3.60 
  -6   7   3    1.40    2.90 
  -6   7   3    6.60    3.40 
   5  -7  -3    1.20    3.40 
  -5   7   3    2.20    2.90 
  -5   7   3    2.10    2.90 
  -5   7   3    4.90    2.90 
   4  -7  -3    3.80    2.90 
   4  -7  -3    1.50    3.30 
   4  -7  -3    5.10    4.20 
  -4   7   3    1.90    2.70 
  -4   7   3    9.00    4.20 
  -4   7   3    5.40    2.90 
   3  -7  -3    4.30    4.30 
   3  -7  -3   -0.90    2.40 
   3  -7  -3    2.30    3.30 
  -3   7   3    4.00    2.90 
  -3   7   3    2.10    2.70 
  -3   7   3    1.10    1.90 
   2  -7  -3   -2.00    2.00 
   2  -7  -3   -4.30    3.30 
   2  -7  -3    0.70    2.70 
  -2   7   3    1.80    2.00 
  -2   7   3    0.00    3.00 
  -2   7   3   -0.50    2.20 
   1  -7  -3    2.30    3.40 
   1  -7  -3   -0.20    2.30 
   1  -7  -3    2.60    2.60 
  -1   7   3    3.90    3.10 
  -1   7   3    5.80    2.90 
  -1   7   3   -3.60    2.90 
  -1   7   3    2.60    2.00 
  -1   7   3    8.80    3.60 
   0  -7  -3    0.60    2.80 
   0  -7  -3    5.30    3.50 
   0  -7  -3    8.10    2.70 
   0  -7  -3    5.40    3.50 
   0   7   3    5.50    2.80 
   0   7   3    6.40    3.80 
   0   7   3   11.40    2.50 
   0   7   3    1.90    2.60 
   0   7   3   -2.00    3.00 
  -1  -7  -3    0.60    2.90 
  -1  -7  -3    3.80    3.20 
   1   7   3    2.70    3.10 
   1   7   3    5.80    2.20 
   1   7   3    0.80    2.50 
   1   7   3    4.20    2.70 
   1   7   3   -0.20    3.20 
  -2  -7  -3    6.60    3.20 
  -2  -7  -3    4.80    3.70 
   2   7   3   -2.60    3.20 
   2   7   3    2.90    3.80 
  -3  -7  -3    3.80    3.20 
  -3  -7  -3    2.50    2.90 
  -3  -7  -3    6.00    3.00 
   3   7   3    2.10    4.00 
  -4  -7  -3   54.19    8.30 
  -4  -7  -3   51.49    7.70 
   4   7   3   44.40    7.90 
   4   7   3   45.70    9.00 
  -5  -7  -3    4.30    4.30 
  -5  -7  -3   -2.00    3.00 
   5   7   3   -0.20    4.40 
  -6  -7  -3   -0.80    3.50 
  -6  -7  -3    1.80    3.50 
   6   7   3   -3.90    4.00 
  -7  -7  -3   -7.30    3.90 
  -7  -7  -3   -1.50    2.70 
   7   7   3   -4.90    4.10 
   7  -8  -3    6.50    4.20 
  -7   8   3    0.80    3.10 
   6  -8  -3   -9.00    7.30 
   6  -8  -3    3.30    4.10 
  -6   8   3    0.00    2.60 
  -6   8   3    7.30    2.80 
   5  -8  -3    8.90    5.00 
   5  -8  -3    8.90    5.20 
   5  -8  -3    1.00    4.10 
  -5   8   3    1.00    2.80 
  -5   8   3    5.10    4.10 
  -5   8   3    5.30    3.10 
   4  -8  -3    2.90    4.00 
   4  -8  -3    4.90    6.30 
  -4   8   3    3.10    3.10 
  -4   8   3    9.20    3.70 
  -4   8   3    3.40    2.80 
   3  -8  -3    8.50    3.70 
   3  -8  -3    3.90    3.70 
   3  -8  -3    6.30    4.80 
  -3   8   3    4.30    3.40 
  -3   8   3    0.80    2.50 
  -3   8   3    2.50    2.70 
   2  -8  -3   14.50    5.10 
   2  -8  -3   11.90    4.20 
   2  -8  -3   10.60    5.10 
  -2   8   3   10.80    4.10 
  -2   8   3   14.60    4.00 
  -2   8   3   14.30    5.00 
   1  -8  -3   12.70    3.60 
   1  -8  -3    7.00    4.50 
   1  -8  -3    6.10    4.10 
  -1   8   3    4.70    3.30 
  -1   8   3    3.60    2.60 
  -1   8   3   -1.40    2.40 
  -1   8   3    8.80    2.80 
   0  -8  -3    3.50    3.50 
   0  -8  -3   -2.20    2.70 
   0   8   3    4.90    3.50 
   0   8   3   -1.10    3.50 
   0   8   3    4.40    2.30 
   0   8   3    4.00    3.90 
   0   8   3    1.80    2.70 
  -1  -8  -3    8.10    4.30 
  -1  -8  -3    4.90    2.60 
   1   8   3   -2.00    2.40 
   1   8   3   -0.80    3.10 
   1   8   3    5.90    3.70 
   1   8   3    2.90    2.60 
  -2  -8  -3   41.40    7.80 
  -2  -8  -3   56.59    8.10 
  -2  -8  -3   48.30    7.90 
   2   8   3   53.09    8.30 
   2   8   3   44.50    9.10 
  -3  -8  -3    5.70    4.50 
  -3  -8  -3    7.00    3.90 
  -3  -8  -3   11.50    4.60 
   3   8   3    9.50    5.30 
   3   8   3    2.70    4.30 
  -4  -8  -3    3.90    3.90 
  -4  -8  -3   -2.20    3.80 
  -4  -8  -3    5.20    3.90 
   4   8   3    3.70    4.50 
   4   8   3    3.50    5.00 
  -5  -8  -3    2.50    3.70 
  -5  -8  -3    4.70    5.00 
   5   8   3    6.90    6.20 
   5   8   3    6.50    5.40 
   6   8   3   -4.40    4.40 
   6  -9  -3    2.20    4.70 
  -6   9   3    3.10    3.20 
   5  -9  -3   -1.10    3.70 
  -5   9   3   -2.80    2.70 
   4  -9  -3    2.80    4.70 
   4  -9  -3    6.80    4.00 
   4  -9  -3   10.20    6.40 
  -4   9   3    7.50    3.90 
  -4   9   3   -0.50    3.00 
  -4   9   3    5.90    4.60 
   3  -9  -3    3.00    3.90 
   3  -9  -3   -5.50    2.80 
   3  -9  -3   -2.40    4.30 
  -3   9   3   -3.90    2.90 
  -3   9   3    3.50    4.40 
   2  -9  -3    8.10    5.10 
   2  -9  -3    4.00    3.90 
   2  -9  -3    1.60    3.30 
  -2   9   3   -4.40    3.80 
  -2   9   3   -0.20    2.60 
  -2   9   3    4.50    3.50 
   1  -9  -3    6.40    4.70 
   1  -9  -3    2.40    3.90 
  -1   9   3    7.40    4.50 
  -1   9   3    8.70    3.10 
  -1   9   3   10.10    5.20 
   0  -9  -3    7.00    4.00 
   0  -9  -3   -1.70    3.60 
   0  -9  -3    4.70    4.00 
   0   9   3    1.90    3.30 
   0   9   3    4.40    4.80 
   0   9   3    7.90    3.30 
  -1  -9  -3    7.60    4.60 
  -1  -9  -3    0.20    4.30 
  -1  -9  -3    3.20    3.30 
   1   9   3    3.70    3.20 
   1   9   3    6.40    4.60 
   1   9   3    4.70    3.40 
  -2  -9  -3    0.50    3.20 
  -2  -9  -3   -2.60    3.20 
  -2  -9  -3    7.70    4.30 
   2   9   3   -1.40    3.80 
   2   9   3    8.40    4.70 
  -3  -9  -3   -5.70    5.70 
  -3  -9  -3    2.40    4.10 
  -3  -9  -3    4.40    3.80 
   3   9   3   -2.70    5.00 
  -4  -9  -3    2.20    3.60 
   4   9   3   -9.20    4.30 
  -5  -9  -3   -1.00    4.00 
  -5  10   3    3.80    4.40 
   4 -10  -3   -0.90    4.20 
  -4  10   3   -1.00    2.90 
   3 -10  -3   -5.80    4.00 
   3 -10  -3    2.00    4.40 
  -3  10   3   -2.90    3.00 
  -2  10   3    2.90    2.90 
  -2  10   3   -1.80    4.30 
   1 -10  -3   -3.10    4.00 
   1 -10  -3    1.30    4.10 
  -1  10   3    0.30    3.20 
  -1  10   3    9.40    5.10 
   0 -10  -3    7.90    4.50 
   0 -10  -3   -0.10    3.50 
   0  10   3    1.00    2.90 
  -1 -10  -3   -1.90    4.50 
  -1 -10  -3   -2.10    3.70 
   1  10   3    2.80    4.70 
  -2 -10  -3    6.80    5.20 
  -2 -10  -3    5.10    4.80 
   2  10   3    3.50    5.30 
  -3 -10  -3   -2.50    4.70 
   3  10   3   -3.30    5.20 
  -4 -10  -3   -8.40    3.50 
   4  10   3   -0.30    6.00 
   3 -11  -3   -3.60    5.10 
  -3  11   3   -1.70    3.30 
   2 -11  -3    1.00    4.60 
   2 -11  -3   -9.70    5.70 
  -2  11   3    0.70    3.40 
   1 -11  -3    0.10    4.70 
   1 -11  -3   -2.60    4.80 
  -1  11   3   -7.70    4.70 
  -1  11   3   -1.90    3.60 
   0 -11  -3    4.90    5.00 
   0 -11  -3   -0.90    5.70 
   0  11   3   11.40    6.90 
   0  11   3    4.90    4.60 
  -1 -11  -3    9.30    7.60 
  -1 -11  -3   -4.10    4.70 
   1  11   3   -8.90    5.40 
  -2 -11  -3   -2.10    4.90 
   2  11   3    1.50    6.10 
  -3 -11  -3   -3.70    4.60 
  -3 -11   4    0.10    5.70 
   2  11  -4    5.30    4.20 
  -2 -11   4   16.90    6.40 
   1  11  -4    6.30    4.60 
  -1 -11   4    1.00    6.10 
   0  11  -4   14.80    6.60 
   0  11  -4   16.90    7.90 
   0 -11   4   13.90    6.60 
   0 -11   4   16.20    6.60 
  -1  11  -4    7.50    4.70 
   1 -11   4   -9.90    5.20 
   1 -11   4    1.60    5.00 
  -2  11  -4   -3.70    4.20 
   2 -11   4    2.50    6.30 
   2 -11   4    4.60    5.10 
  -3  11  -4    1.40    4.70 
   3 -11   4    8.40    5.20 
  -4 -10   4   -0.70    4.90 
   3  10  -4   -5.10    4.30 
  -3 -10   4    1.80    4.50 
   2  10  -4   -1.20    4.90 
   2  10  -4   -0.10    4.10 
   2  10  -4    3.80    3.40 
  -2 -10   4   10.20    6.80 
  -2 -10   4    0.30    3.60 
   1  10  -4   -7.00    3.50 
   1  10  -4   -2.70    4.40 
  -1 -10   4    5.50    4.40 
  -1 -10   4    8.80    5.30 
   0  10  -4    0.90    3.50 
   0  10  -4    4.60    4.10 
   0 -10   4    4.50    4.70 
   0 -10   4    2.20    3.70 
  -1  10  -4    1.70    4.00 
  -1  10  -4    3.60    3.70 
  -1  10  -4   -0.70    4.90 
   1 -10   4   -4.90    3.10 
   1 -10   4    3.20    5.00 
  -2  10  -4    1.70    3.40 
  -2  10  -4   -0.50    4.50 
   2 -10   4    0.70    3.50 
   2 -10   4    5.90    4.60 
  -3  10  -4    2.30    3.30 
   3 -10   4    1.60    3.70 
   3 -10   4    9.10    5.10 
  -4  10  -4   -2.80    3.40 
   4 -10   4    6.20    5.50 
  -5  10  -4   -6.00    3.00 
   6   9  -4    6.40    5.90 
  -6  -9   4    4.60    6.20 
   5   9  -4   10.50    6.20 
  -5  -9   4    4.30    4.10 
   4   9  -4    6.90    5.30 
  -4  -9   4    4.80    4.60 
  -3  -9   4    7.50    5.50 
  -3  -9   4   11.80    6.00 
   2   9  -4    1.90    4.60 
   2   9  -4    1.20    2.90 
   2   9  -4    7.60    5.00 
   2   9  -4   -5.30    3.10 
  -2  -9   4   -0.10    3.80 
  -2  -9   4    4.00    2.40 
  -2  -9   4   -0.90    3.60 
   1   9  -4    4.40    5.00 
   1   9  -4    5.70    4.00 
   1   9  -4    3.50    3.70 
  -1  -9   4    1.50    4.10 
  -1  -9   4    2.50    2.10 
  -1  -9   4    3.70    3.50 
   0   9  -4   24.40    9.20 
   0   9  -4    7.40    4.30 
   0   9  -4   12.80    4.30 
   0  -9   4    8.70    5.10 
  -1   9  -4    1.20    3.30 
  -1   9  -4    1.80    3.00 
   1  -9   4    6.40    4.60 
   1  -9   4    6.40    3.70 
  -2   9  -4    9.80    4.40 
  -2   9  -4   -6.20    3.70 
  -2   9  -4    1.90    3.30 
   2  -9   4    1.30    3.60 
   2  -9   4    2.80    4.30 
  -3   9  -4    5.50    4.20 
  -3   9  -4   -4.30    3.50 
  -3   9  -4    6.50    3.60 
   3  -9   4   -1.50    3.50 
   3  -9   4    6.20    4.80 
   3  -9   4    3.80    4.60 
  -4   9  -4    3.80    3.70 
  -4   9  -4    9.30    5.50 
  -4   9  -4    3.90    4.30 
   4  -9   4    2.30    6.30 
   4  -9   4   11.50    5.40 
  -5   9  -4    3.60    3.00 
   5  -9   4    5.10    4.50 
  -6   9  -4    2.20    2.90 
   6  -9   4    8.80    5.20 
   6   8  -4   -8.80    5.60 
  -6  -8   4    9.30    5.40 
   5   8  -4   13.90    8.00 
   5   8  -4   17.00    6.90 
   4   8  -4   32.10    8.20 
   4   8  -4   30.80    7.70 
  -4  -8   4   20.00    6.90 
  -4  -8   4   30.00    7.40 
   3   8  -4   15.40    6.50 
   3   8  -4    9.70    3.20 
   3   8  -4    7.60    5.30 
  -3  -8   4    8.00    4.80 
  -3  -8   4   15.20    3.00 
  -3  -8   4   13.80    4.80 
   2   8  -4   -6.30    2.80 
   2   8  -4   -2.30    4.00 
  -2  -8   4   -5.70    3.30 
  -2  -8   4   -0.60    2.10 
  -2  -8   4    7.30    4.00 
   1   8  -4    0.70    3.60 
   1   8  -4   -1.10    2.90 
  -1  -8   4   -0.40    2.00 
  -1  -8   4    0.70    3.40 
  -1  -8   4    2.70    2.80 
   0   8  -4    4.30    4.10 
   0   8  -4    2.80    4.30 
   0   8  -4    7.30    3.30 
   0   8  -4   12.60    3.80 
   0  -8   4    7.00    4.80 
   0  -8   4    6.60    4.40 
   0  -8   4    7.00    3.80 
   0  -8   4    4.80    2.80 
  -1   8  -4   -5.50    2.90 
  -1   8  -4   -1.10    2.50 
  -1   8  -4   -1.70    2.10 
   1  -8   4   -2.10    3.20 
  -2   8  -4  134.09   13.30 
  -2   8  -4  148.69   12.40 
  -2   8  -4  123.39   10.20 
   2  -8   4  149.49   13.30 
   2  -8   4  119.49   12.70 
   2  -8   4  148.19   11.70 
  -3   8  -4    5.40    3.00 
  -3   8  -4   12.40    4.40 
  -3   8  -4    1.80    3.80 
   3  -8   4    6.70    4.50 
   3  -8   4   12.20    4.30 
   3  -8   4    0.20    3.90 
  -4   8  -4   32.80    5.90 
  -4   8  -4   25.60    5.30 
   4  -8   4   23.50    6.60 
   4  -8   4   28.30    7.20 
  -5   8  -4    5.70    5.50 
  -5   8  -4    1.40    2.50 
  -5   8  -4    1.80    3.40 
   5  -8   4   -5.00    3.30 
   5  -8   4    2.80    4.70 
  -6   8  -4   -4.40    2.40 
  -6   8  -4   -2.20    3.40 
   6  -8   4    0.00    3.20 
   6  -8   4   -4.90    4.90 
  -7   8  -4    1.60    2.60 
   7  -8   4    4.20    4.30 
   7   7  -4   -3.00    3.90 
  -7  -7   4    5.00    3.50 
   6   7  -4    4.60    5.50 
   6   7  -4    6.90    5.00 
  -6  -7   4    4.40    3.10 
   5   7  -4    7.50    5.10 
   5   7  -4    0.90    4.00 
  -5  -7   4   -1.10    3.10 
  -5  -7   4    2.70    3.30 
   4   7  -4   14.50    5.50 
   4   7  -4   10.80    5.60 
  -4  -7   4   17.20    4.80 
  -4  -7   4   16.20    4.90 
   3   7  -4   14.50    5.30 
   3   7  -4   11.80    3.10 
   3   7  -4   14.80    5.40 
  -3  -7   4   11.30    2.70 
  -3  -7   4   12.10    4.80 
  -3  -7   4   12.80    4.30 
   2   7  -4  114.09   11.50 
   2   7  -4  116.09   11.10 
   2   7  -4   88.29    6.60 
  -2  -7   4   98.69    6.90 
  -2  -7   4  123.09   10.80 
  -2  -7   4  110.79   10.50 
   1   7  -4    7.50    3.00 
   1   7  -4   17.10    4.20 
   1   7  -4   12.00    4.10 
  -1  -7   4    9.40    3.40 
  -1  -7   4    5.00    2.20 
  -1  -7   4    6.50    3.70 
   0   7  -4  132.49    9.40 
   0   7  -4  162.18   13.50 
   0   7  -4  153.68   11.30 
   0  -7   4  159.48   12.40 
   0  -7   4  146.69    9.40 
   0  -7   4  156.48   12.90 
  -1   7  -4    2.40    2.50 
  -1   7  -4    9.10    3.20 
  -1   7  -4    3.90    3.70 
  -1   7  -4    3.60    3.10 
   1  -7   4    5.20    3.70 
   1  -7   4    2.50    3.10 
   1  -7   4    4.90    3.80 
   1  -7   4    2.30    2.30 
  -2   7  -4   46.20    5.80 
  -2   7  -4   40.50    8.50 
  -2   7  -4   50.79    6.80 
   2  -7   4   47.90    8.50 
   2  -7   4   45.20    7.10 
   2  -7   4   43.00    6.20 
  -3   7  -4   17.70    4.30 
  -3   7  -4   21.60    5.50 
  -3   7  -4   38.40    6.00 
   3  -7   4   26.00    6.50 
   3  -7   4   23.50    5.20 
   3  -7   4   29.40    6.40 
  -4   7  -4    0.70    1.90 
  -4   7  -4    1.00    2.90 
  -4   7  -4    0.10    2.40 
   4  -7   4   -5.40    2.50 
   4  -7   4   -4.20    3.20 
   4  -7   4    4.90    3.20 
  -5   7  -4   -1.50    2.20 
  -5   7  -4    1.90    2.50 
   5  -7   4    2.20    3.00 
   5  -7   4   -0.40    3.20 
   5  -7   4    0.10    3.40 
  -6   7  -4    7.90    3.80 
  -6   7  -4    6.60    3.40 
   6  -7   4    3.10    3.90 
   6  -7   4    4.50    3.30 
   6  -7   4    6.80    4.50 
  -7   7  -4   -5.40    2.70 
  -7   7  -4   -2.10    2.60 
   7  -7   4    4.50    5.50 
   7  -7   4   -0.90    4.60 
   7   6  -4   -4.70    4.00 
   7   6  -4   -1.60    4.90 
  -7  -6   4    7.10    3.40 
   6   6  -4   -6.60    4.50 
   6   6  -4    7.60    5.20 
  -6  -6   4    1.50    3.00 
   5   6  -4    5.80    3.10 
  -5  -6   4   -3.50    1.90 
  -5  -6   4   -2.20    2.40 
   4   6  -4    6.90    4.00 
   4   6  -4   -0.50    3.30 
   4   6  -4    0.90    2.20 
  -4  -6   4   -4.40    2.50 
  -4  -6   4    1.80    2.40 
   3   6  -4    3.30    3.50 
   3   6  -4    0.40    3.20 
   3   6  -4    1.00    1.90 
  -3  -6   4    4.70    2.90 
  -3  -6   4    5.30    2.00 
  -3  -6   4    3.80    2.70 
   2   6  -4   22.30    3.40 
   2   6  -4   25.60    4.80 
   2   6  -4   24.40    5.40 
   2   6  -4   22.60    5.90 
  -2  -6   4   25.60    3.20 
  -2  -6   4   18.80    4.60 
   1   6  -4   53.79    7.70 
   1   6  -4   73.19    7.70 
   1   6  -4   67.79    5.80 
   1   6  -4   68.29    6.70 
  -1  -6   4   75.69    7.80 
  -1  -6   4   70.39    7.70 
  -1  -6   4   68.99    6.90 
  -1  -6   4   73.39    5.20 
   0   6  -4  160.18   11.60 
   0   6  -4  134.89    8.00 
   0   6  -4  145.19   10.20 
   0  -6   4  144.59   11.00 
   0  -6   4  146.29    8.20 
   0  -6   4  151.68   11.60 
   0  -6   4  160.88   10.50 
  -1   6  -4   17.30    4.00 
  -1   6  -4   20.50    3.70 
  -1   6  -4   26.60    5.00 
  -1   6  -4   19.50    4.60 
  -1   6  -4   19.20    3.50 
   1  -6   4   18.70    5.20 
   1  -6   4   20.40    4.20 
   1  -6   4   19.70    5.00 
   1  -6   4   19.70    3.50 
  -2   6  -4   11.90    3.70 
  -2   6  -4   11.00    3.10 
  -2   6  -4    9.90    2.90 
  -2   6  -4    8.80    3.60 
   2  -6   4   14.70    3.30 
   2  -6   4   17.80    4.30 
   2  -6   4    6.60    3.40 
  -3   6  -4    0.20    1.70 
  -3   6  -4   -3.70    2.30 
   3  -6   4    1.30    3.10 
  -4   6  -4    2.90    2.00 
  -4   6  -4   -2.10    2.40 
  -4   6  -4    2.30    2.60 
   4  -6   4    2.30    2.90 
   4  -6   4   -0.60    2.30 
  -5   6  -4    3.40    2.30 
   5  -6   4    1.70    2.90 
   5  -6   4    1.40    2.90 
  -6   6  -4    6.40    2.60 
  -6   6  -4   -1.00    2.00 
   6  -6   4    1.30    3.80 
   6  -6   4    0.70    2.60 
  -7   6  -4   -0.10    2.20 
  -7   6  -4   -1.80    2.10 
   7  -6   4    1.10    2.90 
   7  -6   4    3.80    4.90 
   8  -6   4    8.70    7.20 
   8   5  -4    8.20    4.40 
   8   5  -4    1.30    5.50 
  -8  -5   4    3.20    3.30 
   7   5  -4   -0.50    3.40 
   7   5  -4    6.10    3.80 
   7   5  -4   -1.90    4.20 
  -7  -5   4   -0.80    2.30 
  -7  -5   4   -1.60    2.20 
   6   5  -4    7.50    3.60 
   6   5  -4    7.40    3.70 
   6   5  -4   12.30    4.50 
  -6  -5   4   12.10    3.00 
  -6  -5   4    5.80    3.40 
   5   5  -4    9.80    3.00 
   5   5  -4    9.00    4.30 
   5   5  -4    7.70    3.70 
  -5  -5   4    6.70    2.70 
  -5  -5   4   13.70    3.40 
   4   5  -4    0.30    2.80 
   4   5  -4    3.60    2.00 
  -4  -5   4    0.20    2.10 
  -4  -5   4    2.20    2.50 
  -4  -5   4    1.10    2.10 
   3   5  -4    7.30    3.40 
   3   5  -4    4.80    2.90 
   3   5  -4    7.70    2.20 
  -3  -5   4    6.10    1.90 
  -3  -5   4    1.80    2.40 
  -3  -5   4    9.30    2.90 
   2   5  -4   30.30    3.50 
   2   5  -4   31.90    5.10 
   2   5  -4   36.30    5.70 
  -2  -5   4   39.80    5.30 
  -2  -5   4   40.30    4.80 
  -2  -5   4   38.40    3.40 
  -2  -5   4   31.70    5.00 
   1   5  -4    2.90    2.30 
   1   5  -4    5.60    2.30 
   1   5  -4   15.00    3.50 
  -1  -5   4    8.60    1.80 
  -1  -5   4    6.00    2.20 
  -1  -5   4    7.20    2.50 
  -1  -5   4    7.30    2.60 
   0   5  -4   47.70    4.10 
   0   5  -4   58.19    6.30 
   0   5  -4   59.39    5.90 
   0   5  -4   53.39    5.40 
   0  -5   4   53.09    5.80 
   0  -5   4   46.50    6.20 
   0  -5   4   59.49    4.40 
   0  -5   4   51.29    5.40 
  -1   5  -4   63.29    6.60 
  -1   5  -4   72.59    5.30 
  -1   5  -4   69.59    6.10 
   1  -5   4   58.99    5.70 
   1  -5   4   64.89    6.50 
   1  -5   4   57.79    6.60 
   1  -5   4   60.39    5.00 
  -2   5  -4   16.10    3.20 
  -2   5  -4   18.20    3.90 
  -2   5  -4    9.20    2.90 
  -2   5  -4   20.30    3.70 
  -2   5  -4   15.50    3.80 
   2  -5   4   17.00    3.60 
   2  -5   4   15.80    4.00 
   2  -5   4   12.70    2.70 
   2  -5   4   19.60    4.70 
  -3   5  -4   11.20    3.10 
  -3   5  -4   14.80    3.90 
   3  -5   4   16.20    3.50 
   3  -5   4   12.20    3.80 
  -4   5  -4   11.00    3.50 
  -4   5  -4   15.30    3.60 
   4  -5   4   12.20    3.80 
   4  -5   4   18.00    4.30 
   4  -5   4   14.80    3.60 
  -5   5  -4    1.90    1.90 
  -5   5  -4    4.40    2.00 
   5  -5   4    1.30    3.10 
   5  -5   4    2.20    2.30 
   5  -5   4   -0.20    2.00 
  -6   5  -4    1.00    2.00 
  -6   5  -4    2.00    2.40 
   6  -5   4    0.80    3.00 
   6  -5   4    3.90    2.70 
  -7   5  -4   -2.40    2.40 
   7  -5   4    3.40    3.80 
   7  -5   4   -1.60    2.40 
  -8   5  -4   -0.30    2.30 
   8  -5   4   -6.70    4.90 
   8  -5   4    0.00    2.80 
   8   4  -4    3.20    4.20 
   8   4  -4    3.80    4.30 
   8   4  -4    5.10    5.20 
  -8  -4   4    2.20    2.70 
   7   4  -4   -2.00    3.70 
   7   4  -4    6.10    3.90 
   7   4  -4    2.10    3.30 
   6   4  -4   35.00    6.00 
   6   4  -4   39.20    8.70 
  -6  -4   4   30.30    4.20 
   5   4  -4    8.90    3.60 
   5   4  -4   15.60    3.70 
   5   4  -4   12.40    4.00 
  -5  -4   4   16.60    3.60 
  -5  -4   4   13.30    2.80 
   4   4  -4   15.20    3.60 
   4   4  -4   12.40    2.90 
   4   4  -4    4.20    3.50 
  -4  -4   4   10.10    3.10 
  -4  -4   4    6.10    2.50 
  -4  -4   4   15.50    2.80 
   3   4  -4    3.40    1.90 
   3   4  -4    4.20    2.60 
   3   4  -4    4.60    1.90 
  -3  -4   4    3.60    2.50 
  -3  -4   4    3.70    2.10 
  -3  -4   4    4.50    2.20 
  -3  -4   4    2.70    1.90 
   2   4  -4    6.80    2.40 
   2   4  -4    3.30    1.70 
   2   4  -4    7.80    3.00 
   2   4  -4    7.10    2.90 
  -2  -4   4    3.00    1.90 
  -2  -4   4    5.40    2.50 
  -2  -4   4    4.90    1.60 
  -2  -4   4    5.40    2.20 
   1   4  -4    1.50    1.50 
   1   4  -4    7.40    2.00 
   1   4  -4    0.50    1.40 
   1   4  -4    0.40    1.70 
  -1  -4   4    0.90    0.90 
  -1  -4   4    2.80    1.90 
  -1  -4   4    0.60    1.20 
  -1  -4   4    3.30    1.70 
   0   4  -4   -0.30    1.50 
   0   4  -4    2.20    1.70 
   0   4  -4    1.40    1.20 
   0   4  -4    2.30    1.40 
   0  -4   4    2.30    2.00 
   0  -4   4   -1.70    1.10 
   0  -4   4    0.10    1.50 
   0  -4   4    0.70    1.00 
  -1   4  -4   36.70    3.40 
  -1   4  -4   33.00    3.90 
  -1   4  -4   43.10    4.60 
  -1   4  -4   27.90    3.70 
   1  -4   4   34.10    4.70 
   1  -4   4   34.10    4.00 
   1  -4   4   31.80    4.00 
   1  -4   4   34.00    3.40 
  -2   4  -4   13.20    2.70 
  -2   4  -4   15.80    3.40 
  -2   4  -4   11.60    2.70 
  -2   4  -4   12.20    2.70 
  -2   4  -4   10.50    2.70 
   2  -4   4   13.50    3.10 
   2  -4   4   13.80    3.40 
   2  -4   4   11.40    2.60 
  -3   4  -4    5.80    2.30 
  -3   4  -4    4.80    2.30 
  -3   4  -4    3.70    2.00 
  -3   4  -4    2.70    2.00 
  -3   4  -4    4.40    1.90 
   3  -4   4    3.00    2.40 
   3  -4   4    2.70    1.70 
   3  -4   4    8.40    2.40 
   3  -4   4    4.20    2.10 
  -4   4  -4    4.40    2.20 
  -4   4  -4    9.40    3.10 
   4  -4   4    4.70    2.50 
   4  -4   4    4.70    2.30 
   4  -4   4    6.10    3.20 
  -5   4  -4    0.60    2.00 
  -5   4  -4    2.30    1.80 
   5  -4   4    7.30    2.90 
   5  -4   4    2.40    2.60 
  -6   4  -4   -0.20    2.30 
   6  -4   4    4.70    2.30 
   6  -4   4   -1.20    2.10 
  -7   4  -4   -1.40    2.70 
   7  -4   4    4.40    2.60 
  -8   4  -4   -0.70    2.90 
   8  -4   4   -1.10    2.50 
  -9   4  -4    0.60    4.10 
   9   3  -4    2.70    5.80 
  -9  -3   4   -4.30    3.80 
   8   3  -4    1.60    3.80 
  -8  -3   4   -3.80    2.40 
   7   3  -4   -4.90    2.70 
   7   3  -4    5.50    2.70 
   6   3  -4   20.70    3.90 
   6   3  -4   24.00    5.10 
   6   3  -4   24.70    4.80 
  -6  -3   4   24.20    3.80 
   5   3  -4    5.20    2.70 
   5   3  -4    0.70    2.60 
   5   3  -4    4.20    2.50 
  -5  -3   4    2.50    1.90 
  -5  -3   4    3.40    1.80 
   4   3  -4    5.30    2.70 
   4   3  -4   10.90    2.40 
   4   3  -4    9.40    3.00 
   4   3  -4    6.50    2.40 
  -4  -3   4   12.40    2.80 
   3   3  -4   32.00    4.00 
   3   3  -4   28.00    4.20 
   3   3  -4   30.90    3.40 
   3   3  -4   34.60    3.40 
  -3  -3   4   32.10    3.60 
  -3  -3   4   31.10    2.90 
  -3  -3   4   33.00    3.90 
  -3  -3   4   32.90    3.60 
   2   3  -4   40.10    3.70 
   2   3  -4   32.20    4.00 
   2   3  -4   32.70    4.00 
   2   3  -4   40.70    3.10 
  -2  -3   4   33.30    3.50 
  -2  -3   4   32.70    3.70 
  -2  -3   4   35.70    3.10 
  -2  -3   4   34.30    3.80 
   1   3  -4    4.30    1.80 
   1   3  -4    6.80    1.80 
   1   3  -4    3.10    1.90 
   1   3  -4    1.50    1.20 
  -1  -3   4    4.20    1.90 
  -1  -3   4    3.70    1.20 
  -1  -3   4    3.60    1.90 
  -1  -3   4    3.00    1.40 
   0   3  -4    9.30    2.60 
   0   3  -4   13.90    2.60 
   0   3  -4    9.90    1.70 
   0  -3   4   11.30    2.60 
   0  -3   4    9.60    2.60 
   0  -3   4   10.10    1.70 
   0  -3   4    7.00    1.90 
  -1   3  -4    1.10    1.00 
  -1   3  -4   -0.30    1.10 
  -1   3  -4    2.10    1.30 
   1  -3   4   -1.30    0.70 
   1  -3   4    0.40    1.00 
   1  -3   4    2.00    1.40 
   1  -3   4   -0.60    1.30 
  -2   3  -4   63.39    4.50 
  -2   3  -4   61.89    5.20 
  -2   3  -4   65.69    4.90 
  -2   3  -4   72.89    4.90 
  -2   3  -4   69.99    4.90 
   2  -3   4   65.49    5.00 
   2  -3   4   65.69    4.90 
   2  -3   4   71.89    4.80 
  -3   3  -4    1.30    1.30 
  -3   3  -4    4.70    2.10 
  -3   3  -4    2.90    1.70 
   3  -3   4    3.40    1.50 
   3  -3   4    3.20    1.70 
   3  -3   4    2.40    1.90 
   3  -3   4    2.10    1.40 
  -4   3  -4  133.59    9.60 
  -4   3  -4  138.29    7.40 
  -4   3  -4  151.78    9.30 
   4  -3   4  151.98    8.60 
   4  -3   4  150.18    8.00 
  -5   3  -4   16.60    3.80 
   5  -3   4   24.40    3.50 
  -6   3  -4  116.89   10.60 
   6  -3   4  151.68    8.40 
  -7   3  -4   -1.20    2.30 
  -8   3  -4    5.70    4.60 
  -9   3  -4    8.90    3.30 
   9   2  -4    6.70    5.50 
  -9  -2   4   -2.80    3.40 
   8   2  -4    4.00    3.30 
  -8  -2   4    5.10    3.80 
   7   2  -4    1.50    3.00 
   6   2  -4    4.70    3.20 
  -6  -2   4    1.10    2.10 
   5   2  -4   63.39    6.30 
  -5  -2   4   65.99    5.50 
   4   2  -4   18.50    3.30 
   4   2  -4   15.00    2.10 
   4   2  -4   16.70    3.10 
   4   2  -4   18.50    3.10 
  -4  -2   4   16.00    2.60 
  -4  -2   4   15.40    2.80 
   3   2  -4   21.90    2.40 
   3   2  -4   24.10    3.10 
   3   2  -4   22.10    2.90 
   3   2  -4   19.40    3.00 
  -3  -2   4   24.80    2.70 
  -3  -2   4   20.60    2.50 
   2   2  -4    3.50    1.70 
   2   2  -4    2.70    1.30 
   2   2  -4    2.90    1.30 
   2   2  -4    0.60    0.90 
  -2  -2   4    2.80    1.20 
  -2  -2   4    2.00    1.40 
  -2  -2   4    3.50    1.40 
  -2  -2   4    1.20    1.40 
   1   2  -4  389.66   15.60 
   1   2  -4  398.56   15.50 
   1   2  -4  442.06   13.80 
  -1  -2   4  453.65   13.90 
  -1  -2   4  390.16   15.00 
  -1  -2   4  388.76   15.50 
  -1  -2   4  392.36   15.40 
   0   2  -4   15.20    2.60 
   0   2  -4   17.80    2.60 
   0   2  -4   15.50    1.80 
   0   2  -4   16.00    2.40 
   0  -2   4   17.20    1.80 
   0  -2   4   14.90    2.20 
   0  -2   4   15.80    2.80 
   0  -2   4   16.10    2.70 
  -1   2  -4  294.77   11.70 
  -1   2  -4  303.77   12.00 
  -1   2  -4  309.47   11.80 
  -1   2  -4  316.67   11.60 
   1  -2   4  307.77   11.70 
   1  -2   4  306.47   12.00 
  -2   2  -4   16.90    2.90 
  -2   2  -4   14.90    2.50 
  -2   2  -4   16.70    2.40 
   2  -2   4   16.80    2.80 
   2  -2   4   12.70    1.90 
   2  -2   4   13.10    2.10 
   2  -2   4   16.30    2.70 
  -3   2  -4    7.40    2.20 
  -3   2  -4    6.10    1.90 
  -3   2  -4    9.50    1.80 
   3  -2   4    7.10    1.80 
  -4   2  -4    8.40    2.80 
  -5   2  -4    6.90    2.90 
  -6   2  -4   42.70    6.10 
  -7   2  -4    6.20    2.80 
  -8   2  -4   17.40    4.80 
  -9   2  -4    1.20    3.60 
   9   1  -4    2.80    3.90 
  -9  -1   4    5.10    3.60 
   8   1  -4    0.10    3.80 
  -8  -1   4   -1.60    2.40 
   7   1  -4    1.40    2.70 
   6   1  -4    6.70    3.80 
   5   1  -4    7.10    3.70 
  -5  -1   4    6.80    3.40 
   4   1  -4    2.80    1.90 
  -4  -1   4   -1.50    1.10 
   3   1  -4  148.69    7.00 
   3   1  -4  156.38    6.70 
   3   1  -4  153.58    7.90 
  -3  -1   4  155.08    6.60 
  -3  -1   4  157.48    7.60 
   2   1  -4  759.42   24.60 
   2   1  -4  728.13   24.40 
   2   1  -4  752.12   24.10 
   2   1  -4  761.62   24.70 
  -2  -1   4  767.02   24.30 
  -2  -1   4  735.63   24.00 
  -2  -1   4  648.94   24.70 
   1   1  -4   23.90    2.50 
   1   1  -4   30.00    2.20 
   1   1  -4   26.00    2.20 
  -1  -1   4   28.70    2.00 
  -1  -1   4   26.20    2.50 
  -1  -1   4   27.20    2.60 
  -1  -1   4   23.80    2.10 
   0   1  -4 9999.00  288.77 
   0   1  -4 9606.34  288.77 
   0  -1   4 9532.85  288.67 
   0  -1   4 9521.25  288.37 
   0  -1   4 9577.24  288.77 
  -1   1  -4    0.80    0.70 
  -1   1  -4    0.70    0.60 
  -1   1  -4   -0.10    0.70 
  -1   1  -4   -1.00    0.70 
   1  -1   4    0.50    0.80 
   1  -1   4    0.50    0.60 
   1  -1   4    1.00    0.80 
  -2   1  -4  351.66   13.00 
  -2   1  -4  335.37   13.40 
   2  -1   4  345.27   13.20 
  -3   1  -4    8.10    2.10 
  -3   1  -4    7.90    2.10 
  -4   1  -4   27.20    3.90 
  -4   1  -4   24.70    3.50 
  -5   1  -4    2.60    2.00 
  -5   1  -4    2.80    2.40 
  -6   1  -4    5.50    2.70 
  -7   1  -4    3.30    2.70 
  -8   1  -4    5.50    3.30 
  -9   1  -4   -1.70    3.50 
   9   0  -4    0.70    4.50 
  -9   0   4   -0.40    2.80 
   8   0  -4    9.00    5.10 
  -8   0   4    1.60    3.10 
   7   0  -4   -1.00    3.40 
  -7   0   4    0.90    2.20 
   6   0  -4    0.80    2.60 
   5   0  -4    3.20    2.60 
  -5   0   4    1.70    2.20 
   4   0  -4   42.80    4.80 
  -4   0   4   41.80    4.50 
   3   0  -4   29.00    3.50 
  -3   0   4   33.50    3.50 
   2   0  -4 3514.55  104.69 
   2   0  -4 3344.27  104.79 
   2   0  -4 3481.35  106.19 
  -2   0   4 3423.26  104.49 
  -2   0   4 3587.04  106.09 
   1   0  -4   14.20    1.60 
   1   0  -4   15.10    1.50 
  -1   0   4   18.60    1.80 
  -1   0   4   15.40    1.50 
  -1   0   4   13.60    2.00 
  -1   0   4   12.30    1.60 
   0   0  -4   -0.40    0.30 
   0   0   4    0.20    0.20 
   0   0   4   -0.10    0.20 
   0   0   4    0.20    0.30 
  -1   0  -4   80.29    3.40 
  -1   0  -4   71.09    3.10 
   1   0   4   74.89    3.40 
   1   0   4   73.99    3.20 
   1   0   4   73.09    3.50 
   1   0   4   71.19    3.10 
  -2   0  -4 2928.51   90.79 
  -2   0  -4 2968.90   90.39 
   2   0   4 3002.40   90.69 
  -3   0  -4   41.00    3.80 
  -3   0  -4   40.30    3.40 
  -4   0  -4  796.32   28.50 
  -4   0  -4  812.72   29.30 
   4   0   4  829.32   29.30 
  -5   0  -4   51.39    5.20 
  -5   0  -4   53.99    5.90 
   5   0   4   53.19    5.70 
  -6   0  -4   11.80    4.60 
  -6   0  -4   10.00    3.60 
  -7   0  -4    0.30    2.50 
  -8   0  -4    0.40    2.80 
  -9   0  -4    0.90    3.70 
   9  -1  -4    7.80    5.20 
  -9   1   4    3.50    4.10 
   8  -1  -4   -2.30    3.10 
  -8   1   4    0.70    2.80 
   7  -1  -4   -5.50    2.60 
  -7   1   4    1.70    2.20 
   6  -1  -4    7.70    3.90 
   5  -1  -4   87.79    8.10 
  -5   1   4   89.39    7.30 
   4  -1  -4  581.34   23.40 
  -4   1   4  565.64   22.70 
   3  -1  -4    0.50    0.70 
   3  -1  -4    2.00    1.60 
  -3   1   4   -0.30    1.20 
  -3   1   4    0.30    0.80 
   2  -1  -4 2592.64   79.19 
   2  -1  -4 2608.34   81.19 
   2  -1  -4 2613.74   79.39 
   2  -1  -4 2545.75   79.19 
   2  -1  -4 2605.74   80.19 
  -2   1   4 2678.43   81.09 
  -2   1   4 2602.84   79.29 
   1  -1  -4   16.40    1.90 
   1  -1  -4   17.90    2.10 
   1  -1  -4   12.30    1.60 
  -1   1   4   17.10    1.90 
  -1   1   4   15.40    2.20 
  -1   1   4   17.70    2.10 
  -1   1   4   14.40    1.70 
   0  -1  -4  810.72   25.40 
   0  -1  -4  819.72   24.80 
   0  -1  -4  779.22   25.40 
   0  -1  -4  805.32   26.30 
   0  -1  -4  808.62   25.60 
   0   1   4  813.82   24.70 
   0   1   4  785.72   25.50 
   0   1   4  799.02   26.30 
   0   1   4  782.22   25.40 
  -1  -1  -4   17.90    2.30 
  -1  -1  -4   20.80    1.90 
  -1  -1  -4   17.60    1.90 
  -1  -1  -4   18.90    1.80 
   1   1   4   20.00    2.40 
   1   1   4   18.70    1.90 
  -2  -1  -4 3302.67   99.79 
  -2  -1  -4 3292.97  100.49 
  -2  -1  -4 3313.97   99.99 
  -3  -1  -4   30.90    2.70 
  -3  -1  -4   31.20    3.10 
   3   1   4   32.50    3.10 
  -4  -1  -4  760.02   27.20 
  -4  -1  -4  773.52   26.90 
   4   1   4  776.52   27.40 
  -5  -1  -4    2.40    2.00 
  -5  -1  -4   -0.50    1.80 
   5   1   4    6.40    2.70 
  -6  -1  -4    2.00    2.20 
  -6  -1  -4    3.90    2.90 
  -7  -1  -4    2.90    2.60 
  -8  -1  -4   -0.40    4.10 
  -9  -1  -4    6.10    3.70 
   9  -2  -4   -7.00    3.30 
  -9   2   4   -2.70    3.40 
   8  -2  -4   -0.90    3.30 
  -8   2   4    2.70    3.40 
   7  -2  -4    2.90    3.70 
  -7   2   4   -1.10    2.20 
   6  -2  -4   34.00    6.50 
  -6   2   4   23.40    5.00 
   5  -2  -4    1.50    2.70 
   4  -2  -4  258.97   11.00 
   4  -2  -4  274.57   14.30 
  -4   2   4  248.48   13.30 
   3  -2  -4   -0.20    1.00 
   3  -2  -4    1.60    1.10 
   3  -2  -4    1.40    1.10 
   3  -2  -4    2.90    1.80 
  -3   2   4   -0.10    1.00 
  -3   2   4    0.80    1.60 
   2  -2  -4   60.99    4.00 
   2  -2  -4   47.80    4.10 
   2  -2  -4   59.19    3.80 
   2  -2  -4   57.99    4.00 
   2  -2  -4   63.59    4.90 
  -2   2   4   57.39    3.70 
  -2   2   4   63.19    4.40 
  -2   2   4   60.19    4.70 
  -2   2   4   63.39    4.00 
  -2   2   4   56.59    3.70 
   1  -2  -4  115.69    5.90 
   1  -2  -4  125.99    6.10 
   1  -2  -4  113.89    6.50 
   1  -2  -4  106.49    5.50 
  -1   2   4  113.29    5.60 
  -1   2   4  111.19    5.60 
  -1   2   4  114.39    6.40 
  -1   2   4   89.99    8.10 
  -1   2   4  112.49    5.70 
   0  -2  -4  465.65   17.30 
   0  -2  -4  462.05   16.50 
   0  -2  -4  453.75   16.10 
   0  -2  -4  437.26   16.40 
   0  -2  -4  459.35   15.20 
   0   2   4  474.95   17.40 
   0   2   4  445.76   16.10 
   0   2   4  465.15   16.40 
   0   2   4  459.15   15.20 
  -1  -2  -4    2.60    1.10 
  -1  -2  -4    2.00    1.50 
  -1  -2  -4    2.80    1.20 
  -1  -2  -4    1.70    1.00 
   1   2   4    3.30    1.70 
   1   2   4    2.30    1.80 
   1   2   4    2.70    1.20 
  -2  -2  -4  336.47   12.60 
  -2  -2  -4  347.37   12.90 
  -2  -2  -4  339.97   12.70 
  -2  -2  -4  334.77   13.00 
   2   2   4  340.37   12.50 
   2   2   4  349.07   13.70 
  -3  -2  -4    3.90    1.10 
  -3  -2  -4    6.80    1.60 
  -3  -2  -4    5.30    1.60 
   3   2   4    4.80    1.30 
   3   2   4    5.90    1.90 
   3   2   4    5.20    1.70 
  -4  -2  -4  766.72   26.30 
  -4  -2  -4  790.92   26.60 
   4   2   4  764.52   26.70 
  -5  -2  -4   12.80    2.90 
  -5  -2  -4   13.70    2.80 
   5   2   4   14.50    3.10 
  -6  -2  -4  484.55   20.80 
  -6  -2  -4  455.95   20.00 
  -7  -2  -4   -1.10    2.30 
  -7  -2  -4    3.90    2.40 
  -8  -2  -4    3.20    3.10 
  -9   3   4   -4.50    3.00 
   8  -3  -4   -1.60    3.70 
  -8   3   4    6.50    3.50 
   7  -3  -4    3.90    3.30 
  -7   3   4    0.90    2.60 
   6  -3  -4   18.90    5.60 
  -6   3   4   18.90    4.60 
   5  -3  -4    4.70    2.90 
   5  -3  -4    7.80    3.40 
   5  -3  -4    3.50    2.10 
  -5   3   4    2.70    2.50 
   4  -3  -4   38.30    5.40 
   4  -3  -4   32.50    4.70 
   4  -3  -4   38.60    4.10 
   4  -3  -4   34.70    3.80 
   4  -3  -4   39.00    3.50 
  -4   3   4   37.50    5.60 
  -4   3   4   39.30    5.00 
   3  -3  -4    3.30    1.60 
   3  -3  -4    1.00    1.70 
   3  -3  -4    4.60    1.50 
   3  -3  -4    1.60    1.70 
   3  -3  -4    1.70    2.00 
  -3   3   4    2.30    1.60 
  -3   3   4    1.30    1.60 
  -3   3   4    5.20    1.60 
  -3   3   4    3.90    2.00 
  -3   3   4    3.50    1.50 
   2  -3  -4  131.39    7.30 
   2  -3  -4  138.09    8.00 
   2  -3  -4  123.29    6.80 
  -2   3   4  126.69    6.90 
  -2   3   4  130.29    7.40 
  -2   3   4  132.09    7.60 
  -2   3   4  158.78    8.20 
  -2   3   4  134.09    6.90 
   1  -3  -4   68.09    4.80 
   1  -3  -4   68.29    4.70 
   1  -3  -4   65.19    4.50 
   1  -3  -4   69.89    5.70 
   1  -3  -4   68.09    4.90 
  -1   3   4   74.59    4.50 
  -1   3   4   66.29    5.40 
  -1   3   4   63.59    4.50 
  -1   3   4   68.99    4.70 
  -1   3   4   72.39    4.90 
   0  -3  -4    1.90    1.20 
   0  -3  -4    1.70    1.00 
   0  -3  -4    1.10    1.50 
   0  -3  -4    1.10    1.30 
   0   3   4    1.80    0.80 
   0   3   4    3.90    1.80 
   0   3   4    1.20    1.40 
   0   3   4    2.30    1.40 
   0   3   4    2.00    1.00 
  -1  -3  -4   71.49    4.90 
  -1  -3  -4   66.29    4.70 
  -1  -3  -4   64.69    5.00 
  -1  -3  -4   75.49    5.70 
   1   3   4   69.99    5.70 
   1   3   4   71.49    5.10 
   1   3   4   74.49    4.80 
  -2  -3  -4  164.88    8.80 
  -2  -3  -4  161.68    8.10 
  -2  -3  -4  167.38    8.40 
  -2  -3  -4  159.68    8.20 
   2   3   4  165.28    8.00 
   2   3   4  161.58    9.20 
  -3  -3  -4   67.39    6.80 
  -3  -3  -4   56.79    4.60 
  -3  -3  -4   56.99    4.50 
   3   3   4   54.19    4.80 
   3   3   4   64.89    5.60 
  -4  -3  -4    1.40    1.30 
  -4  -3  -4    1.20    1.60 
   4   3   4    3.10    2.40 
   4   3   4    3.00    1.40 
  -5  -3  -4    0.80    1.70 
  -5  -3  -4    2.60    1.80 
  -5  -3  -4    0.80    1.40 
  -5  -3  -4    3.10    2.00 
   5   3   4    0.60    2.00 
   5   3   4    1.40    2.40 
   5   3   4   -1.00    1.80 
  -6  -3  -4   25.10    4.10 
  -6  -3  -4   16.90    3.10 
  -7  -3  -4    0.20    2.20 
  -7  -3  -4   -0.10    2.70 
  -8  -3  -4    6.80    5.00 
  -9   4   4   -6.20    2.90 
   8  -4  -4    0.80    4.20 
  -8   4   4   -2.80    3.10 
   7  -4  -4   -3.90    3.20 
   7  -4  -4   -3.00    3.00 
   7  -4  -4   -1.00    2.40 
  -7   4   4    1.90    2.80 
   6  -4  -4    2.50    2.60 
   6  -4  -4    3.60    3.30 
   6  -4  -4    3.30    2.30 
  -6   4   4    7.90    3.80 
   5  -4  -4   -4.20    2.20 
   5  -4  -4   -1.10    1.70 
   5  -4  -4    1.30    3.00 
   5  -4  -4    3.40    2.40 
  -5   4   4   -1.10    1.90 
   4  -4  -4   -0.90    1.60 
   4  -4  -4   -0.30    2.30 
   4  -4  -4    0.20    2.40 
   4  -4  -4    1.60    2.00 
  -4   4   4    1.30    1.60 
  -4   4   4    1.70    1.70 
   3  -4  -4    1.80    1.70 
   3  -4  -4    0.20    1.20 
   3  -4  -4    2.00    2.00 
   3  -4  -4    1.00    1.70 
  -3   4   4    0.80    1.50 
  -3   4   4   -0.30    1.80 
  -3   4   4   -0.20    1.20 
  -3   4   4   -0.10    1.50 
  -3   4   4   -2.80    1.30 
   2  -4  -4  142.79    8.00 
   2  -4  -4  132.89    9.20 
   2  -4  -4  144.59    8.70 
   2  -4  -4  142.39    8.20 
   2  -4  -4  144.59    8.70 
  -2   4   4  141.09    8.10 
  -2   4   4  141.59    7.90 
  -2   4   4  141.19    8.50 
  -2   4   4  151.38    9.20 
  -2   4   4  134.39    8.00 
   1  -4  -4    9.90    2.30 
   1  -4  -4   12.70    3.30 
   1  -4  -4   10.10    2.50 
  -1   4   4   11.30    2.90 
   0  -4  -4 3701.13  114.19 
   0  -4  -4 3667.13  115.39 
   0  -4  -4 3618.74  113.69 
   0  -4  -4 3587.44  113.09 
   0   4   4 3751.82  115.39 
   0   4   4 3604.44  113.19 
   0   4   4 3532.75  113.39 
   0   4   4 3731.53  111.29 
   0   4   4 3550.24  110.69 
  -1  -4  -4  217.28   11.10 
  -1  -4  -4  226.58   11.00 
  -1  -4  -4  202.18   11.50 
   1   4   4  203.18   10.70 
   1   4   4  208.08   10.40 
   1   4   4  211.38   11.90 
  -2  -4  -4  447.26   19.60 
  -2  -4  -4  462.25   19.10 
  -2  -4  -4  479.15   19.00 
   2   4   4  474.35   18.60 
   2   4   4  445.26   19.00 
   2   4   4  480.15   20.60 
  -3  -4  -4   55.29    5.10 
  -3  -4  -4   46.10    5.00 
  -3  -4  -4   50.29    4.80 
   3   4   4   58.69    6.30 
   3   4   4   48.80    4.50 
  -4  -4  -4    2.30    1.80 
  -4  -4  -4    4.80    2.40 
   4   4   4    3.60    2.90 
  -5  -4  -4   14.90    3.40 
  -5  -4  -4   15.60    3.40 
   5   4   4   19.60    5.00 
  -6  -4  -4    0.60    1.90 
   6   4   4    1.50    3.10 
  -7  -4  -4    1.70    2.30 
   7   4   4   -2.00    3.30 
   7   4   4    9.90    4.00 
  -8  -4  -4    0.20    3.40 
   8   4   4    2.00    5.20 
   8  -5  -4   -9.20    4.70 
  -8   5   4    5.70    3.50 
   7  -5  -4    3.10    4.10 
  -7   5   4    2.20    3.30 
   6  -5  -4   -2.60    2.80 
   6  -5  -4    0.30    2.50 
   6  -5  -4    2.00    2.30 
   6  -5  -4    2.00    3.10 
  -6   5   4   -0.60    2.20 
   5  -5  -4   10.10    4.30 
   5  -5  -4   24.90    4.80 
   5  -5  -4   22.40    4.00 
   5  -5  -4   11.50    4.30 
  -5   5   4   17.40    3.40 
  -5   5   4   18.60    4.40 
   4  -5  -4    0.50    2.30 
   4  -5  -4    1.10    2.40 
   4  -5  -4    1.50    2.00 
   4  -5  -4   -0.10    2.50 
  -4   5   4   -1.10    2.30 
  -4   5   4   -0.30    1.90 
  -4   5   4    0.30    2.10 
   3  -5  -4   15.80    3.80 
   3  -5  -4   22.90    3.50 
   3  -5  -4   25.10    4.80 
   3  -5  -4   12.50    4.00 
  -3   5   4   18.70    3.80 
  -3   5   4   15.30    4.00 
  -3   5   4   19.60    4.30 
  -3   5   4   16.50    3.40 
   2  -5  -4  213.48   12.20 
   2  -5  -4  220.68   12.00 
   2  -5  -4  223.28   13.30 
  -2   5   4  208.08   11.50 
  -2   5   4  204.68   11.20 
  -2   5   4  210.88   11.00 
  -2   5   4  207.78   11.30 
  -2   5   4  225.18   12.90 
   1  -5  -4    1.20    1.70 
   1  -5  -4    1.00    2.60 
   1  -5  -4    1.60    1.60 
   1  -5  -4   -1.80    1.90 
  -1   5   4   -1.20    2.10 
  -1   5   4    1.80    1.30 
  -1   5   4   -0.30    1.50 
  -1   5   4   -1.10    1.30 
   0  -5  -4   32.00    5.20 
   0  -5  -4   29.60    4.10 
   0  -5  -4   35.20    4.80 
   0  -5  -4   28.70    4.30 
   0   5   4   32.60    4.20 
   0   5   4   26.50    4.40 
   0   5   4   33.60    3.70 
   0   5   4   31.00    3.10 
   0   5   4   35.60    5.40 
  -1  -5  -4    4.00    2.70 
  -1  -5  -4    2.80    2.10 
  -1  -5  -4    1.50    2.00 
   1   5   4    4.50    2.30 
   1   5   4   -0.50    2.10 
   1   5   4    5.50    3.20 
  -2  -5  -4  120.99    9.10 
  -2  -5  -4  119.89    9.30 
  -2  -5  -4  110.99   10.80 
   2   5   4  129.69    8.40 
   2   5   4  122.79    9.00 
   2   5   4  119.59   12.00 
  -3  -5  -4   -0.80    1.60 
  -3  -5  -4    4.30    2.90 
  -3  -5  -4    0.50    2.00 
   3   5   4   -0.70    2.60 
   3   5   4    7.20    2.70 
  -4  -5  -4   30.90    5.70 
  -4  -5  -4   38.30    5.00 
  -4  -5  -4   35.10    4.90 
   4   5   4   28.80    6.00 
  -5  -5  -4    1.10    2.00 
  -5  -5  -4   -3.30    2.00 
   5   5   4   -2.90    2.50 
  -6  -5  -4   -3.40    2.10 
  -6  -5  -4    0.40    2.80 
   6   5   4    0.80    3.50 
   6   5   4    2.10    3.70 
  -7  -5  -4    8.70    3.30 
   7   5   4    4.40    5.20 
   7   5   4    1.80    3.70 
   8  -6  -4    0.60    3.10 
   8  -6  -4    0.60    6.50 
  -8   6   4    0.20    3.70 
   7  -6  -4    3.90    4.70 
  -7   6   4   -1.30    3.10 
   6  -6  -4   20.90    4.90 
   6  -6  -4   25.90    6.60 
  -6   6   4   14.50    5.20 
   5  -6  -4   18.40    5.50 
   5  -6  -4    9.90    3.40 
  -5   6   4    9.60    4.00 
  -5   6   4   10.10    3.00 
   4  -6  -4   14.40    3.90 
   4  -6  -4   15.10    4.70 
  -4   6   4   10.80    4.00 
  -4   6   4   11.40    3.50 
   3  -6  -4   -3.30    2.60 
   3  -6  -4   -1.40    1.90 
  -3   6   4   -1.40    1.70 
  -3   6   4    2.00    2.30 
   2  -6  -4   52.99    6.70 
   2  -6  -4   50.49    7.40 
   2  -6  -4   44.90    5.80 
   2  -6  -4   44.50    5.30 
  -2   6   4   48.80    5.30 
  -2   6   4   43.70    5.70 
  -2   6   4   47.90    6.70 
  -2   6   4   48.60    5.60 
   1  -6  -4    4.20    2.10 
   1  -6  -4    3.20    2.90 
   1  -6  -4   -2.60    2.20 
   1  -6  -4   -1.10    1.50 
  -1   6   4   -0.10    1.70 
  -1   6   4   -0.30    2.40 
  -1   6   4   -0.90    2.00 
  -1   6   4    0.70    1.40 
  -1   6   4   -1.10    1.70 
   0  -6  -4   22.90    5.10 
   0  -6  -4   15.40    3.70 
   0  -6  -4   14.60    3.60 
   0  -6  -4   14.60    4.20 
   0   6   4   17.90    2.70 
   0   6   4   18.90    4.50 
   0   6   4   22.10    5.30 
   0   6   4   10.30    2.80 
   0   6   4   15.80    3.10 
  -1  -6  -4    3.30    2.30 
  -1  -6  -4    2.30    2.50 
  -1  -6  -4    1.90    2.20 
  -1  -6  -4    0.60    2.40 
   1   6   4    1.20    1.70 
   1   6   4    1.50    3.30 
   1   6   4    2.40    2.00 
   1   6   4    1.10    2.60 
  -2  -6  -4   26.70    5.20 
  -2  -6  -4   18.70    4.30 
  -2  -6  -4   22.70    4.70 
   2   6   4   20.00    4.10 
   2   6   4   22.30    5.60 
   2   6   4   19.20    4.90 
  -3  -6  -4    1.10    2.20 
  -3  -6  -4    2.60    2.80 
  -3  -6  -4    5.60    2.90 
   3   6   4    2.10    3.20 
   3   6   4    0.80    3.10 
  -4  -6  -4   20.60    4.50 
  -4  -6  -4    9.40    3.60 
  -4  -6  -4   11.10    4.00 
   4   6   4   14.60    5.30 
  -5  -6  -4   -0.40    2.40 
  -5  -6  -4    6.30    2.80 
   5   6   4    3.40    3.80 
   5   6   4    3.70    3.70 
  -6  -6  -4   -1.10    2.60 
  -6  -6  -4   -4.50    2.20 
   6   6   4    1.00    4.40 
   6   6   4    7.30    4.40 
  -7  -6  -4   -3.00    3.40 
  -7  -6  -4   -2.50    2.90 
   7   6   4    3.70    4.30 
   7   6   4   -1.80    5.60 
   8   6   4    0.30    5.00 
   7  -7  -4   -1.80    5.60 
   7  -7  -4   -0.90    3.60 
  -7   7   4    2.50    3.00 
   6  -7  -4    2.40    4.20 
   6  -7  -4    2.20    4.50 
   6  -7  -4   -2.60    2.70 
  -6   7   4   -0.20    2.70 
  -6   7   4    3.20    2.80 
   5  -7  -4    5.40    3.50 
   5  -7  -4    6.30    3.50 
  -5   7   4    3.60    2.90 
  -5   7   4    3.90    3.30 
  -5   7   4    4.20    3.10 
   4  -7  -4    7.80    4.20 
   4  -7  -4    8.60    3.60 
   4  -7  -4    8.60    5.00 
  -4   7   4   13.70    3.80 
  -4   7   4   17.40    4.60 
  -4   7   4   17.50    5.00 
   3  -7  -4    6.70    3.80 
   3  -7  -4    4.00    4.50 
   3  -7  -4    5.90    3.30 
  -3   7   4   10.10    3.30 
  -3   7   4   11.20    3.50 
  -3   7   4   13.30    4.30 
   2  -7  -4    6.30    4.60 
   2  -7  -4   -1.30    2.60 
  -2   7   4    2.90    2.10 
  -2   7   4    1.00    3.50 
  -2   7   4    4.20    2.60 
   1  -7  -4    6.30    3.10 
   1  -7  -4    3.90    2.60 
   1  -7  -4    2.70    3.20 
  -1   7   4    4.60    2.70 
  -1   7   4    6.30    2.90 
  -1   7   4    5.10    3.00 
  -1   7   4    7.90    3.90 
  -1   7   4    3.60    3.30 
   0  -7  -4    6.10    3.00 
   0  -7  -4    9.20    4.20 
   0  -7  -4    6.00    3.60 
   0  -7  -4    7.70    3.20 
   0   7   4    3.90    1.90 
   0   7   4    1.40    3.30 
   0   7   4    4.40    3.50 
   0   7   4    5.60    3.00 
   0   7   4   11.80    3.00 
  -1  -7  -4   -4.60    2.10 
  -1  -7  -4   -0.40    2.40 
  -1  -7  -4    0.60    3.30 
   1   7   4   -1.50    2.80 
   1   7   4    2.10    3.30 
   1   7   4    0.70    2.40 
   1   7   4    1.80    2.40 
  -2  -7  -4    1.60    2.20 
  -2  -7  -4    1.60    3.40 
   2   7   4   -1.40    2.80 
   2   7   4   -2.30    3.30 
  -3  -7  -4   -3.80    2.50 
  -3  -7  -4    2.50    3.10 
  -3  -7  -4    2.50    2.60 
   3   7   4    0.70    3.90 
   3   7   4    4.50    4.00 
  -4  -7  -4    3.20    3.50 
  -4  -7  -4   -4.80    4.50 
   4   7   4    4.60    4.40 
   4   7   4   12.70    5.20 
  -5  -7  -4    0.50    2.70 
  -5  -7  -4   -0.50    3.10 
   5   7   4   -3.60    4.30 
  -6  -7  -4    8.80    4.80 
  -6  -7  -4   -0.30    3.20 
   6   7   4    7.00    5.50 
   6   7   4   -6.40    5.30 
  -7  -7  -4   -0.30    3.10 
   7   7   4   -4.70    4.20 
   7  -8  -4    3.90    3.40 
  -7   8   4    2.90    3.10 
   6  -8  -4    6.00    4.00 
  -6   8   4   -0.70    3.00 
  -6   8   4    5.50    3.70 
   5  -8  -4   10.50    6.30 
   5  -8  -4   -2.90    2.90 
   5  -8  -4   -5.80    3.40 
  -5   8   4    3.50    3.60 
  -5   8   4    3.20    3.90 
  -5   8   4   -3.20    2.40 
   4  -8  -4   -2.50    3.20 
   4  -8  -4    5.00    4.80 
  -4   8   4    7.90    3.60 
  -4   8   4    1.00    3.20 
  -4   8   4    5.10    2.80 
   3  -8  -4    6.70    4.80 
   3  -8  -4    1.20    2.60 
   3  -8  -4    3.30    3.50 
  -3   8   4    0.80    2.30 
  -3   8   4   -5.50    2.50 
  -3   8   4    2.80    3.00 
   2  -8  -4    6.80    4.20 
   2  -8  -4   13.50    5.10 
   2  -8  -4   10.30    4.50 
  -2   8   4    9.40    3.40 
  -2   8   4    3.70    3.60 
  -2   8   4   11.80    4.30 
   1  -8  -4   -1.40    2.70 
   1  -8  -4    3.00    2.80 
   1  -8  -4    1.40    3.70 
  -1   8   4    2.70    3.30 
  -1   8   4    3.00    2.60 
  -1   8   4    0.80    2.30 
  -1   8   4    0.90    1.80 
   0  -8  -4    5.70    4.10 
   0  -8  -4   12.20    4.40 
   0   8   4   12.70    5.20 
   0   8   4   20.40    4.50 
   0   8   4   22.00    4.20 
   0   8   4   19.40    6.50 
   0   8   4   13.20    3.30 
  -1  -8  -4    0.40    3.00 
  -1  -8  -4    1.50    2.70 
  -1  -8  -4   -4.80    3.30 
   1   8   4    6.70    3.70 
   1   8   4    3.90    3.90 
   1   8   4   -2.80    2.20 
  -2  -8  -4   31.40    6.20 
  -2  -8  -4   13.70    4.70 
  -2  -8  -4   22.60    5.80 
   2   8   4   20.80    6.90 
   2   8   4   17.00    5.20 
  -3  -8  -4    9.90    4.30 
  -3  -8  -4   16.00    4.70 
  -3  -8  -4    6.90    4.30 
   3   8   4   14.50    6.30 
   3   8   4   21.00    7.30 
  -4  -8  -4    4.90    4.30 
  -4  -8  -4   -1.00    3.90 
  -4  -8  -4   -1.30    3.30 
   4   8   4    4.20    5.00 
   4   8   4   13.10    6.00 
  -5  -8  -4    2.40    3.70 
  -5  -8  -4    2.40    3.30 
   5   8   4    6.10    4.80 
   5   8   4   15.30    8.20 
   6   8   4   -0.50    6.50 
   6  -9  -4    4.10    4.90 
  -6   9   4    4.60    3.90 
   5  -9  -4    5.10    4.40 
  -5   9   4   -4.70    2.30 
   4  -9  -4   -3.00    3.40 
   4  -9  -4    7.80    6.60 
   4  -9  -4   -0.10    3.80 
  -4   9   4   -0.50    4.10 
  -4   9   4    6.00    4.40 
  -4   9   4    2.70    2.90 
   3  -9  -4    5.70    4.40 
   3  -9  -4   -7.50    4.40 
   3  -9  -4   -4.40    3.30 
  -3   9   4   -4.90    3.20 
  -3   9   4   -2.00    3.60 
   2  -9  -4    2.40    3.50 
   2  -9  -4    9.70    5.20 
   2  -9  -4   -3.60    3.10 
  -2   9   4    2.10    3.20 
  -2   9   4    1.80    2.70 
  -2   9   4   -3.80    4.00 
   1  -9  -4    3.00    4.10 
   1  -9  -4    0.50    3.60 
  -1   9   4   -4.80    3.10 
  -1   9   4    4.10    4.30 
  -1   9   4    7.50    2.90 
   0  -9  -4   38.50    8.90 
   0  -9  -4   16.50    5.40 
   0  -9  -4   24.70    7.80 
   0   9   4   21.60    6.70 
   0   9   4   17.40    4.10 
  -1  -9  -4   -1.60    3.60 
  -1  -9  -4   10.60    4.60 
  -1  -9  -4    5.10    4.10 
   1   9   4    4.20    3.60 
   1   9   4    6.50    4.90 
  -2  -9  -4   -0.40    3.90 
  -2  -9  -4    1.60    3.30 
  -2  -9  -4   -1.50    3.20 
   2   9   4    3.80    4.20 
   2   9   4    2.00    4.50 
  -3  -9  -4   -2.30    5.60 
  -3  -9  -4    6.50    3.90 
  -3  -9  -4    5.30    4.70 
   3   9   4    0.20    5.00 
   3   9   4    8.80    6.70 
  -4  -9  -4    0.40    3.70 
  -5  -9  -4    0.80    4.00 
   5   9   4   -0.40    6.60 
   4 -10  -4   -1.20    3.90 
  -4  10   4    4.40    3.30 
   3 -10  -4    2.20    5.10 
   3 -10  -4    3.70    4.60 
  -3  10   4    9.00    4.50 
   2 -10  -4   -6.40    2.90 
   2 -10  -4   -6.30    3.40 
  -2  10   4   -0.60    2.60 
  -2  10   4   -1.90    4.20 
   1 -10  -4    0.00    4.00 
   1 -10  -4   -1.00    4.20 
  -1  10   4    5.60    4.80 
  -1  10   4   -4.70    2.60 
   0 -10  -4    2.30    4.30 
   0 -10  -4    6.00    4.90 
   0  10   4   -1.20    2.50 
   0  10   4   -4.20    4.00 
  -1 -10  -4    3.20    4.40 
  -1 -10  -4    5.10    5.40 
  -1 -10  -4    5.70    4.70 
   1  10   4   10.20    5.70 
  -2 -10  -4   -1.60    3.10 
  -2 -10  -4    0.10    3.60 
  -3 -10  -4   -1.40    3.70 
   3  10   4   -0.30    4.80 
  -4 -10  -4   -7.10    3.90 
   4  10   4   -0.60    4.80 
   3 -11  -4    3.60    5.10 
  -3  11   4   -3.20    3.10 
   2 -11  -4  -12.10    5.80 
   2 -11  -4    1.30    5.30 
  -2  11   4    0.80    3.70 
   1 -11  -4    2.30    5.70 
   1 -11  -4    3.00    5.60 
  -1  11   4   -2.00    6.20 
  -1  11   4   -2.30    3.40 
   0 -11  -4    8.90    5.70 
   0 -11  -4    3.00    4.80 
   0  11   4   14.70    7.00 
   0  11   4   -2.80    4.10 
  -1 -11  -4    3.50    5.50 
   1  11   4   11.40    7.30 
  -2 -11  -4   -7.30    4.90 
   2  11   4    4.60    6.40 
  -3 -11  -4    8.40    6.90 
   3  11   4   -5.30    7.70 
   3  11  -5    8.80    6.90 
  -3 -11   5   -8.10    4.40 
   2  11  -5   -2.70    4.20 
   2  11  -5   10.60    6.60 
  -2 -11   5    4.50    5.10 
   1  11  -5   13.70    7.00 
   1  11  -5   -3.90    4.60 
  -1 -11   5    5.80    6.70 
   0  11  -5   -5.90    4.00 
   0  11  -5   -4.90    5.30 
   0 -11   5   -0.30    5.40 
   0 -11   5    5.50    5.80 
  -1  11  -5   -2.10    4.70 
  -1  11  -5    9.90    8.60 
   1 -11   5   -6.60    6.20 
   1 -11   5   -0.80    5.70 
  -2  11  -5    6.70    4.80 
   2 -11   5   -1.40    5.90 
   2 -11   5    8.20    5.70 
  -3  11  -5    3.70    4.70 
   3 -11   5   -1.40    4.90 
   4  10  -5   -0.70    5.40 
  -4 -10   5    5.60    4.60 
  -3 -10   5    5.40    4.30 
   2  10  -5   -0.70    3.50 
  -2 -10   5   11.40    5.60 
  -2 -10   5    1.80    5.40 
   1  10  -5   -0.80    4.00 
   1  10  -5   -5.20    5.00 
  -1 -10   5    3.30    4.70 
  -1 -10   5    7.00    4.00 
   0  10  -5   -0.20    4.10 
   0  10  -5    5.50    4.80 
   0 -10   5    5.00    4.80 
   0 -10   5    4.00    3.30 
  -1  10  -5    4.40    3.80 
  -1  10  -5   -1.90    4.10 
  -1  10  -5   -7.90    4.70 
   1 -10   5   -1.60    4.10 
   1 -10   5    9.50    4.60 
  -2  10  -5    0.90    5.10 
  -2  10  -5    2.40    3.70 
   2 -10   5    2.60    3.60 
   2 -10   5   -3.10    3.30 
  -3  10  -5   -1.60    3.20 
   3 -10   5    3.90    4.20 
   3 -10   5    6.40    5.00 
  -4  10  -5    6.90    3.60 
   4 -10   5    2.50    5.30 
  -5  10  -5   -0.20    3.70 
   6   9  -5   10.90    9.30 
  -6  -9   5   -1.00    5.00 
   5   9  -5    9.70    8.10 
  -5  -9   5   11.30    5.50 
   4   9  -5    7.90    5.70 
  -4  -9   5    4.90    5.70 
  -3  -9   5    9.50    5.20 
  -3  -9   5    2.30    5.10 
   2   9  -5    8.50    4.80 
   2   9  -5    2.60    3.30 
  -2  -9   5   -4.70    3.50 
  -2  -9   5    4.00    2.90 
  -2  -9   5    3.50    3.90 
   1   9  -5    8.30    4.90 
   1   9  -5   -2.40    4.10 
  -1  -9   5   -5.20    3.20 
  -1  -9   5    0.60    3.00 
   0   9  -5   15.50    4.30 
   0   9  -5    5.80    4.20 
   0  -9   5    2.50    4.60 
   0  -9   5   16.20    5.10 
  -1   9  -5   -3.40    3.70 
  -1   9  -5   13.80    4.10 
  -1   9  -5    1.50    3.80 
   1  -9   5    4.90    3.50 
   1  -9   5    7.70    4.40 
  -2   9  -5   16.80    6.70 
  -2   9  -5   27.60    6.30 
  -2   9  -5   13.40    4.80 
   2  -9   5   21.10    6.50 
   2  -9   5   22.80    5.80 
   2  -9   5   15.30    8.40 
  -3   9  -5    2.20    4.10 
  -3   9  -5   -2.00    3.00 
   3  -9   5    6.70    5.10 
   3  -9   5   -2.50    3.50 
   3  -9   5    2.10    4.10 
  -4   9  -5   13.30    4.40 
  -4   9  -5   17.10    5.50 
  -4   9  -5   31.60   10.10 
   4  -9   5   14.70    5.40 
   4  -9   5   10.10    7.30 
  -5   9  -5    2.30    2.50 
   5  -9   5    1.30    4.70 
  -6   9  -5    4.40    3.50 
   6  -9   5    2.10    4.90 
   6   8  -5    2.70    6.00 
  -6  -8   5   -1.00    3.90 
   5   8  -5   21.20    8.80 
   5   8  -5   26.60    8.80 
  -5  -8   5   30.10    7.50 
   4   8  -5    2.20    4.70 
   4   8  -5    0.40    5.70 
  -4  -8   5    5.00    4.40 
  -4  -8   5   -1.90    3.90 
   3   8  -5   19.10    6.80 
   3   8  -5   15.30    4.00 
   3   8  -5   17.60    6.30 
  -3  -8   5   16.10    5.40 
  -3  -8   5    7.30    4.50 
  -3  -8   5   14.20    3.30 
   2   8  -5    3.00    4.40 
   2   8  -5    6.50    3.40 
  -2  -8   5    1.20    3.40 
  -2  -8   5    5.10    3.40 
  -2  -8   5   -1.70    3.60 
   1   8  -5    4.80    3.90 
   1   8  -5    4.80    5.10 
  -1  -8   5    5.40    3.10 
  -1  -8   5    3.90    2.60 
  -1  -8   5    4.10    4.00 
   0   8  -5   22.40    6.50 
   0   8  -5   13.90    5.70 
   0  -8   5   24.60    6.50 
   0  -8   5   10.40    4.10 
   0  -8   5   19.20    6.10 
  -1   8  -5    7.10    3.20 
  -1   8  -5    1.70    2.90 
  -1   8  -5   -5.10    3.00 
   1  -8   5    3.50    3.80 
   1  -8   5    1.40    3.00 
  -2   8  -5    6.50    4.30 
  -2   8  -5    5.70    4.60 
   2  -8   5    6.20    4.00 
   2  -8   5    2.30    4.60 
   2  -8   5    8.70    4.20 
  -3   8  -5   15.80    5.20 
  -3   8  -5   22.10    5.80 
  -3   8  -5   17.80    4.30 
   3  -8   5   13.80    5.90 
   3  -8   5   18.70    5.80 
   3  -8   5   12.10    4.40 
  -4   8  -5    5.50    3.70 
  -4   8  -5    4.40    3.00 
   4  -8   5    1.00    4.10 
   4  -8   5    3.40    3.40 
   4  -8   5    7.40    5.10 
  -5   8  -5    3.80    2.90 
  -5   8  -5   -2.80    3.10 
   5  -8   5    4.50    5.30 
   5  -8   5   -4.80    3.70 
   5  -8   5    5.30    5.10 
  -6   8  -5   -1.10    2.30 
  -6   8  -5    5.50    4.10 
   6  -8   5   22.00    5.60 
   6  -8   5   -1.20    5.80 
  -7   8  -5   -1.90    3.00 
   7  -8   5   -1.50    4.00 
   7   7  -5   -8.40    4.00 
  -7  -7   5    2.50    3.80 
   6   7  -5   -7.50    4.70 
   6   7  -5    1.10    3.20 
  -6  -7   5    2.30    2.80 
   5   7  -5   11.50    5.30 
   5   7  -5    1.80    4.80 
  -5  -7   5    4.80    3.90 
  -5  -7   5   -4.00    2.90 
   4   7  -5   16.50    6.50 
   4   7  -5    9.50    5.40 
  -4  -7   5    8.30    4.00 
  -4  -7   5    6.40    2.30 
  -4  -7   5    6.30    4.10 
   3   7  -5    5.50    2.80 
   3   7  -5    7.60    4.20 
   3   7  -5    3.90    3.80 
  -3  -7   5    1.80    2.90 
  -3  -7   5    4.40    3.30 
  -3  -7   5   -0.80    1.90 
   2   7  -5   21.90    5.80 
   2   7  -5   15.10    5.60 
  -2  -7   5   11.10    2.90 
  -2  -7   5    9.30    3.80 
  -2  -7   5   26.40    5.90 
   1   7  -5   14.40    4.00 
   1   7  -5   11.30    4.00 
   1   7  -5   11.00    4.10 
  -1  -7   5   16.60    4.90 
  -1  -7   5   11.80    5.80 
  -1  -7   5   10.70    3.00 
  -1  -7   5    8.80    4.20 
   0   7  -5  112.49    8.20 
   0   7  -5   96.49   11.20 
   0   7  -5   86.69    9.30 
   0  -7   5   83.09    6.90 
   0  -7   5  100.79   10.70 
   0  -7   5   92.79    9.00 
  -1   7  -5   20.30    4.20 
  -1   7  -5   33.40    6.00 
  -1   7  -5   31.40    6.70 
   1  -7   5   16.40    5.30 
   1  -7   5   26.80    5.90 
   1  -7   5   29.40    5.30 
   1  -7   5   24.10    4.90 
  -2   7  -5   44.50    8.80 
  -2   7  -5   42.80    5.60 
  -2   7  -5   59.79    7.60 
   2  -7   5   48.80    6.70 
   2  -7   5   43.70    7.90 
   2  -7   5   42.60    7.50 
  -3   7  -5    2.80    2.60 
  -3   7  -5   -1.30    2.60 
  -3   7  -5    1.70    2.20 
   3  -7   5   -1.20    2.50 
   3  -7   5    4.30    3.10 
   3  -7   5    1.80    3.20 
  -4   7  -5    7.60    3.10 
  -4   7  -5   11.70    3.80 
  -4   7  -5    9.20    3.80 
   4  -7   5    1.50    3.40 
   4  -7   5   11.10    4.60 
   4  -7   5    4.00    4.00 
  -5   7  -5    0.50    2.70 
  -5   7  -5   -2.90    1.70 
   5  -7   5   -0.40    3.20 
   5  -7   5   -3.70    3.40 
   5  -7   5    1.50    2.70 
  -6   7  -5    8.00    3.10 
  -6   7  -5    9.40    3.80 
   6  -7   5    7.00    5.30 
   6  -7   5    8.40    4.60 
   6  -7   5   15.30    4.80 
  -7   7  -5    0.40    3.00 
  -7   7  -5   -3.20    2.60 
   7  -7   5    4.50    5.20 
   7  -7   5    4.60    4.30 
   8   6  -5    9.00    6.50 
  -8  -6   5   -3.20    3.10 
   7   6  -5   -4.60    3.70 
   7   6  -5   -3.80    4.70 
   7   6  -5   12.30    6.50 
  -7  -6   5    2.80    3.10 
   6   6  -5    7.00    5.80 
   6   6  -5   11.90    3.90 
  -6  -6   5    9.70    3.70 
  -6  -6   5    6.60    3.50 
   5   6  -5    1.00    2.70 
   5   6  -5    9.90    4.70 
   5   6  -5   -0.70    3.40 
  -5  -6   5    1.00    2.30 
  -5  -6   5   -0.60    1.80 
   4   6  -5   41.00    7.00 
   4   6  -5   30.20    4.40 
   4   6  -5   28.30    6.60 
  -4  -6   5   31.90    5.70 
  -4  -6   5   31.90    3.60 
  -4  -6   5   33.50    6.20 
   3   6  -5    7.70    4.10 
   3   6  -5    0.70    2.40 
   3   6  -5    1.80    3.40 
  -3  -6   5    7.00    2.90 
  -3  -6   5    7.60    3.00 
  -3  -6   5    1.40    1.60 
   2   6  -5    0.90    2.60 
   2   6  -5    3.20    2.20 
   2   6  -5    2.70    3.20 
   2   6  -5    2.60    2.20 
  -2  -6   5    1.00    2.20 
  -2  -6   5   -0.10    1.40 
   1   6  -5    9.10    4.10 
   1   6  -5   19.20    4.50 
   1   6  -5   19.30    3.90 
   1   6  -5   17.40    3.80 
  -1  -6   5   20.00    4.50 
  -1  -6   5   16.00    4.00 
  -1  -6   5   14.20    3.60 
  -1  -6   5   25.70    3.30 
   0   6  -5   -1.00    2.50 
   0   6  -5    3.40    2.60 
   0   6  -5    1.80    2.30 
   0   6  -5    3.70    2.20 
   0  -6   5    1.70    2.10 
   0  -6   5    1.50    1.60 
   0  -6   5    2.50    2.70 
   0  -6   5   -1.40    2.30 
  -1   6  -5   79.79    8.00 
  -1   6  -5   74.69    7.20 
  -1   6  -5   67.89    6.00 
   1  -6   5   78.19    8.20 
   1  -6   5   68.19    7.10 
   1  -6   5   80.59    6.30 
   1  -6   5   69.59    8.50 
  -2   6  -5   14.70    4.10 
  -2   6  -5    8.70    2.70 
  -2   6  -5   11.80    4.00 
   2  -6   5   10.90    3.20 
   2  -6   5    5.50    3.60 
  -3   6  -5   -1.20    2.50 
  -3   6  -5    1.50    1.80 
  -3   6  -5   -0.70    2.20 
   3  -6   5    1.70    2.90 
   3  -6   5   -2.60    2.90 
  -4   6  -5    1.20    2.60 
  -4   6  -5   -2.70    2.00 
  -4   6  -5    2.30    2.30 
   4  -6   5    1.80    2.30 
   4  -6   5   -0.40    2.40 
  -5   6  -5    8.50    4.20 
  -5   6  -5    6.40    2.70 
   5  -6   5    3.30    3.20 
   5  -6   5   10.60    4.30 
  -6   6  -5    2.00    2.30 
  -6   6  -5    8.90    2.80 
   6  -6   5    4.50    3.10 
   6  -6   5   13.80    4.60 
  -7   6  -5    3.30    2.70 
  -7   6  -5    1.80    2.50 
   7  -6   5    2.50    4.10 
   7  -6   5   -3.00    2.90 
  -8   6  -5    6.00    3.60 
   8  -6   5    2.00    4.10 
   8  -6   5   23.30    7.40 
   8   5  -5    1.50    4.70 
   8   5  -5    0.90    5.00 
   7   5  -5   -2.20    3.50 
   7   5  -5    6.50    4.20 
  -7  -5   5    5.50    3.10 
   6   5  -5    0.70    3.20 
   6   5  -5    2.70    3.30 
  -6  -5   5    6.50    3.20 
  -6  -5   5    0.00    2.20 
   5   5  -5    5.30    3.50 
   5   5  -5    3.50    2.40 
   5   5  -5    4.90    3.60 
  -5  -5   5    8.70    2.70 
  -5  -5   5   -0.90    2.30 
   4   5  -5   -0.60    2.00 
   4   5  -5    0.90    2.50 
  -4  -5   5    1.50    3.00 
  -4  -5   5    1.40    1.90 
  -4  -5   5    5.90    2.50 
   3   5  -5   46.70    6.40 
   3   5  -5   48.30    6.70 
   3   5  -5   49.10    4.40 
  -3  -5   5   37.90    3.80 
  -3  -5   5   48.50    6.00 
  -3  -5   5   39.20    5.20 
   2   5  -5   17.80    3.00 
   2   5  -5   11.90    4.00 
   2   5  -5    9.80    3.80 
  -2  -5   5   12.60    3.50 
  -2  -5   5   14.20    2.40 
  -2  -5   5   12.80    3.10 
  -2  -5   5   15.70    3.70 
   1   5  -5  251.77   13.80 
   1   5  -5  260.37   13.20 
   1   5  -5  230.48   10.70 
   1   5  -5  240.88   14.10 
  -1  -5   5  251.57   10.80 
  -1  -5   5  253.97   14.20 
  -1  -5   5  254.27   13.90 
  -1  -5   5  266.67   13.40 
   0   5  -5    1.30    2.20 
   0   5  -5    3.00    1.50 
   0   5  -5   -2.30    1.50 
   0   5  -5    1.50    1.80 
   0  -5   5   -1.30    1.90 
   0  -5   5    2.40    2.00 
   0  -5   5   -0.30    1.20 
   0  -5   5    2.70    2.00 
  -1   5  -5  310.87   15.70 
  -1   5  -5  290.47   13.10 
  -1   5  -5  309.27   14.80 
   1  -5   5  303.37   13.60 
   1  -5   5  314.87   15.60 
   1  -5   5  300.67   14.70 
   1  -5   5  297.57   16.10 
  -2   5  -5    8.30    2.50 
  -2   5  -5    8.90    2.50 
  -2   5  -5    7.30    2.80 
  -2   5  -5    7.00    3.00 
  -2   5  -5    9.60    2.90 
   2  -5   5    6.50    3.50 
   2  -5   5    6.80    2.10 
   2  -5   5    5.60    2.30 
  -3   5  -5   26.50    4.70 
  -3   5  -5   28.10    4.80 
  -3   5  -5   22.20    4.10 
   3  -5   5   27.70    4.20 
   3  -5   5   24.80    4.80 
  -4   5  -5   11.10    3.40 
  -4   5  -5    7.60    2.90 
   4  -5   5   16.70    4.00 
   4  -5   5   12.70    3.80 
   4  -5   5   11.50    3.10 
  -5   5  -5    0.20    1.80 
  -5   5  -5    1.00    1.50 
   5  -5   5   -2.30    2.40 
   5  -5   5    6.10    3.00 
   5  -5   5    0.20    2.10 
  -6   5  -5    7.50    3.40 
  -6   5  -5    8.40    2.80 
   6  -5   5    6.30    3.00 
   6  -5   5    3.50    3.20 
  -7   5  -5   -0.10    2.80 
   7  -5   5   -2.20    2.10 
   7  -5   5   -2.80    3.20 
  -8   5  -5   -2.10    2.70 
   8  -5   5   -7.40    4.80 
   8  -5   5    2.40    3.60 
   8   4  -5    1.10    4.10 
   8   4  -5   -2.00    4.10 
   8   4  -5   -3.70    3.60 
   7   4  -5   -0.80    3.10 
   7   4  -5   -3.40    3.20 
   7   4  -5    1.80    3.70 
   6   4  -5   16.20    4.20 
   6   4  -5   21.90    4.70 
  -6  -4   5   17.50    3.20 
   5   4  -5    3.00    2.50 
   5   4  -5    0.20    2.50 
   5   4  -5    1.50    2.50 
  -5  -4   5   -0.30    1.80 
  -5  -4   5   -0.80    1.80 
   4   4  -5   43.50    6.40 
   4   4  -5   52.79    5.90 
   4   4  -5   52.89    5.20 
  -4  -4   5   52.09    4.40 
  -4  -4   5   45.10    5.20 
  -4  -4   5   40.70    4.90 
   3   4  -5    5.10    2.80 
   3   4  -5    7.30    2.30 
  -3  -4   5    9.10    2.50 
  -3  -4   5    9.90    3.00 
  -3  -4   5    8.90    2.70 
   2   4  -5    3.30    1.50 
   2   4  -5    2.40    1.90 
   2   4  -5    0.00    1.70 
   2   4  -5    1.70    1.60 
  -2  -4   5    1.10    1.80 
  -2  -4   5    0.00    1.60 
  -2  -4   5    3.30    1.60 
  -2  -4   5    1.80    1.40 
   1   4  -5   30.20    3.90 
   1   4  -5   27.90    4.40 
   1   4  -5   31.10    4.20 
  -1  -4   5   33.30    4.50 
  -1  -4   5   32.90    4.20 
  -1  -4   5   35.80    3.00 
  -1  -4   5   30.60    3.80 
   0   4  -5    8.70    2.80 
   0   4  -5    6.00    2.30 
   0   4  -5    6.10    1.70 
   0   4  -5    6.90    2.20 
   0  -4   5    6.80    2.60 
   0  -4   5    4.50    1.40 
   0  -4   5    3.60    2.10 
   0  -4   5    5.70    2.10 
  -1   4  -5   20.00    3.20 
  -1   4  -5   22.80    3.60 
  -1   4  -5   17.60    3.40 
  -1   4  -5   26.00    2.90 
   1  -4   5   17.70    3.60 
   1  -4   5   14.80    3.60 
   1  -4   5   20.10    3.10 
   1  -4   5   18.70    2.60 
  -2   4  -5   36.80    3.90 
  -2   4  -5   43.40    4.60 
  -2   4  -5   32.90    4.10 
  -2   4  -5   40.50    4.10 
  -2   4  -5   39.70    4.00 
   2  -4   5   36.90    4.50 
   2  -4   5   35.10    3.90 
   2  -4   5   40.00    4.90 
  -3   4  -5   23.30    3.60 
  -3   4  -5   31.70    3.40 
  -3   4  -5   30.40    4.20 
  -3   4  -5   26.90    3.70 
  -3   4  -5   27.30    3.90 
   3  -4   5   26.70    3.60 
   3  -4   5   27.60    3.90 
   3  -4   5   30.00    4.20 
   3  -4   5   31.90    5.20 
  -4   4  -5    0.00    1.70 
  -4   4  -5    1.70    1.90 
   4  -4   5    1.30    1.90 
   4  -4   5   -0.90    1.80 
  -5   4  -5   -2.20    1.50 
  -5   4  -5    3.10    1.80 
   5  -4   5    1.00    2.00 
   5  -4   5    3.00    2.80 
  -6   4  -5    4.40    3.20 
   6  -4   5    2.20    2.50 
   6  -4   5    6.50    2.50 
  -7   4  -5    2.20    2.90 
   7  -4   5    4.20    2.10 
  -8   4  -5    0.80    2.50 
   8  -4   5   -0.30    3.30 
  -9   4  -5   -0.20    3.40 
   9   3  -5   11.30    5.50 
  -9  -3   5   -5.20    3.00 
   8   3  -5   -0.70    4.30 
   7   3  -5    2.20    3.30 
   7   3  -5    3.80    3.20 
   6   3  -5   48.20    6.20 
   6   3  -5   43.80    5.60 
   6   3  -5   40.10    5.90 
  -6  -3   5   40.10    4.80 
   5   3  -5    5.90    2.80 
   5   3  -5   -0.30    2.40 
   5   3  -5    0.50    2.20 
  -5  -3   5   -0.30    1.70 
  -5  -3   5    1.50    1.80 
   4   3  -5  236.78   11.30 
   4   3  -5  221.38   14.10 
   4   3  -5  255.47   12.00 
   4   3  -5  246.18   12.70 
  -4  -3   5  255.47   11.70 
  -4  -3   5  237.78   10.50 
   3   3  -5    2.70    1.50 
   3   3  -5    4.80    1.90 
   3   3  -5    1.70    1.70 
   3   3  -5    2.90    2.00 
  -3  -3   5    5.70    2.00 
  -3  -3   5    1.80    1.40 
  -3  -3   5    2.20    1.70 
  -3  -3   5    2.30    1.90 
   2   3  -5    2.50    1.30 
   2   3  -5    4.00    1.80 
   2   3  -5    5.60    2.10 
   2   3  -5    3.60    2.10 
  -2  -3   5    6.60    2.20 
  -2  -3   5    2.20    1.50 
  -2  -3   5    6.00    1.70 
  -2  -3   5    1.70    1.70 
   1   3  -5    0.90    1.30 
   1   3  -5   -1.70    1.10 
   1   3  -5    0.10    1.00 
   1   3  -5    5.20    1.60 
  -1  -3   5    0.40    1.20 
  -1  -3   5    1.30    1.70 
  -1  -3   5    3.10    1.10 
  -1  -3   5    1.80    1.30 
   0   3  -5    0.10    0.90 
   0   3  -5    0.00    1.30 
   0   3  -5   -1.40    1.00 
   0   3  -5   -2.00    1.10 
   0  -3   5    0.30    1.30 
   0  -3   5   -1.40    0.90 
   0  -3   5   -0.20    0.90 
   0  -3   5    0.10    0.70 
  -1   3  -5   25.10    3.40 
  -1   3  -5   27.80    2.80 
  -1   3  -5   25.40    3.10 
  -1   3  -5   30.00    3.30 
   1  -3   5   29.80    3.20 
   1  -3   5   30.40    3.50 
   1  -3   5   27.20    3.60 
   1  -3   5   28.40    2.90 
  -2   3  -5    0.70    1.10 
  -2   3  -5    0.30    1.30 
  -2   3  -5    2.00    1.40 
  -2   3  -5    0.20    1.10 
  -2   3  -5    0.00    1.30 
   2  -3   5    0.40    0.90 
   2  -3   5    0.80    1.10 
   2  -3   5    1.90    1.50 
  -3   3  -5   11.20    2.90 
  -3   3  -5    3.80    1.70 
  -3   3  -5    5.60    1.90 
   3  -3   5    7.20    2.20 
   3  -3   5    6.80    2.50 
   3  -3   5    9.60    2.20 
   3  -3   5    7.20    2.10 
  -4   3  -5   65.29    4.90 
  -4   3  -5   67.69    6.10 
  -4   3  -5   69.09    6.50 
   4  -3   5   68.69    4.60 
   4  -3   5   70.89    5.80 
   4  -3   5   68.89    5.30 
  -5   3  -5   -0.50    1.40 
   5  -3   5   -0.30    1.60 
  -6   3  -5    5.30    2.70 
   6  -3   5    3.50    2.10 
  -7   3  -5   -2.40    2.50 
  -8   3  -5   -1.10    3.00 
  -9   3  -5   -1.40    3.80 
   9   2  -5    0.00    4.10 
  -9  -2   5   -0.60    3.50 
   8   2  -5   10.50    5.20 
   7   2  -5   -1.80    3.20 
   6   2  -5   49.70    6.40 
  -6  -2   5   32.70    4.90 
   5   2  -5   24.80    3.70 
   5   2  -5   21.10    4.40 
  -5  -2   5   25.80    3.80 
   4   2  -5    6.40    2.30 
   4   2  -5   10.60    2.60 
   4   2  -5    9.70    1.80 
   4   2  -5    9.70    2.80 
  -4  -2   5    8.90    2.30 
  -4  -2   5   10.20    2.30 
   3   2  -5    2.20    1.60 
   3   2  -5    3.20    1.60 
   3   2  -5    2.40    1.30 
   3   2  -5    4.00    1.70 
  -3  -2   5    3.80    1.50 
  -3  -2   5    2.90    1.40 
   2   2  -5   45.70    3.30 
   2   2  -5   44.00    4.00 
   2   2  -5   44.30    3.60 
  -2  -2   5   47.20    4.00 
  -2  -2   5   45.20    3.50 
  -2  -2   5   40.10    3.80 
  -2  -2   5   46.20    3.10 
   1   2  -5  425.26   16.40 
   1   2  -5  401.36   16.30 
   1   2  -5  404.46   16.00 
   1   2  -5  477.05   14.60 
  -1  -2   5  419.56   16.30 
  -1  -2   5  412.76   16.40 
  -1  -2   5  425.76   15.80 
  -1  -2   5  469.85   14.90 
   0   2  -5    0.30    1.40 
   0   2  -5   -0.60    0.90 
   0   2  -5    1.70    1.30 
   0   2  -5    0.90    1.00 
   0  -2   5   -2.90    1.20 
   0  -2   5    0.10    1.20 
   0  -2   5    0.00    1.30 
   0  -2   5   -0.60    0.90 
  -1   2  -5  252.87   10.30 
  -1   2  -5  241.98   10.40 
  -1   2  -5  257.97   10.40 
  -1   2  -5  273.27   10.10 
   1  -2   5  251.27   10.10 
   1  -2   5  247.38   10.60 
  -2   2  -5   18.90    2.20 
  -2   2  -5   15.00    2.30 
  -2   2  -5   18.90    2.30 
   2  -2   5   18.10    2.60 
   2  -2   5   16.00    2.10 
   2  -2   5   19.90    2.50 
   2  -2   5   18.10    2.50 
  -3   2  -5    3.70    1.60 
  -3   2  -5    5.20    1.90 
  -3   2  -5    5.60    1.60 
   3  -2   5    4.60    1.60 
   3  -2   5    2.30    1.40 
   3  -2   5    2.40    1.40 
  -4   2  -5   52.49    5.50 
  -4   2  -5   43.30    7.90 
  -5   2  -5    0.40    1.70 
  -6   2  -5  108.09    9.30 
  -8   2  -5   60.19    8.50 
  -9   2  -5   -0.60    3.30 
   9   1  -5    4.00    4.40 
  -9  -1   5    1.80    3.30 
   8   1  -5    7.00    4.00 
   7   1  -5    4.00    3.70 
   6   1  -5    1.80    3.20 
   5   1  -5    3.50    2.90 
  -5  -1   5    6.20    2.40 
   4   1  -5    1.80    2.00 
  -4  -1   5    8.40    2.20 
  -4  -1   5    5.70    2.00 
   3   1  -5  271.37   11.80 
   3   1  -5  309.07   12.60 
   3   1  -5  288.97   11.50 
   3   1  -5  287.47   11.10 
  -3  -1   5  299.97   11.20 
  -3  -1   5  300.27   12.00 
   2   1  -5  239.28    9.90 
   2   1  -5  250.47    9.90 
   2   1  -5  251.77   10.20 
   2   1  -5  244.38    9.50 
  -2  -1   5  244.68    9.50 
  -2  -1   5  235.58    9.60 
  -2  -1   5  254.47   10.00 
  -2  -1   5  252.27    9.60 
   1   1  -5   59.59    3.60 
   1   1  -5   62.39    4.00 
   1   1  -5   61.59    3.30 
  -1  -1   5   56.59    3.90 
  -1  -1   5   64.39    3.60 
  -1  -1   5   66.59    3.30 
  -1  -1   5   63.29    4.10 
   0   1  -5    0.40    0.90 
   0   1  -5   -0.30    0.70 
   0   1  -5    0.90    1.10 
   0   1  -5   -0.50    1.00 
   0  -1   5    0.10    1.00 
   0  -1   5   -0.50    0.60 
   0  -1   5    0.50    0.90 
   0  -1   5    1.00    1.00 
  -1   1  -5    0.10    0.80 
  -1   1  -5    0.60    0.90 
  -1   1  -5    0.30    0.80 
  -1   1  -5    1.70    0.80 
   1  -1   5   -0.30    0.70 
   1  -1   5   -0.10    0.30 
   1  -1   5    0.90    1.00 
   1  -1   5    0.80    0.80 
  -2   1  -5  192.68    8.80 
  -2   1  -5  179.28    7.70 
  -2   1  -5  193.18    8.30 
   2  -1   5  195.78    8.50 
   2  -1   5  193.68    7.20 
  -3   1  -5   57.69    4.80 
  -3   1  -5   62.59    4.50 
   3  -1   5   55.29    4.50 
  -4   1  -5   13.00    3.00 
  -4   1  -5   16.50    3.00 
  -5   1  -5   17.50    3.60 
  -5   1  -5   11.80    3.10 
  -6   1  -5    6.50    2.90 
  -7   1  -5    8.40    3.20 
  -8   1  -5   23.10    5.50 
  -9   1  -5   -1.10    3.60 
   9   0  -5   -0.60    3.70 
  -9   0   5    2.50    3.50 
   8   0  -5    9.10    4.90 
  -8   0   5    1.10    3.00 
   7   0  -5    2.60    3.10 
   6   0  -5   -2.20    2.50 
   5   0  -5   31.00    5.30 
  -5   0   5   32.50    4.40 
   4   0  -5    8.00    2.70 
  -4   0   5    5.90    2.20 
   3   0  -5  130.29    7.50 
  -3   0   5  129.79    5.70 
  -3   0   5  131.09    7.20 
   2   0  -5 5935.71  183.38 
   2   0  -5 6278.77  184.18 
   2   0  -5 6069.19  183.18 
   2   0  -5 6132.39  184.58 
  -2   0   5 5992.20  183.08 
  -2   0   5 6217.68  184.28 
   1   0  -5   27.80    2.30 
   1   0  -5   28.30    2.10 
   1   0  -5   26.00    2.30 
  -1   0   5   25.50    2.00 
  -1   0   5   27.20    2.80 
  -1   0   5   28.30    2.30 
  -1   0   5   30.40    2.30 
   0   0  -5   17.40    2.10 
   0   0  -5   17.20    1.60 
   0   0  -5   17.60    2.00 
   0   0   5   17.90    2.50 
   0   0   5   21.70    1.80 
   0   0   5   19.00    1.90 
  -1   0  -5    1.90    0.80 
  -1   0  -5    0.70    0.90 
  -1   0  -5    1.50    0.80 
  -1   0  -5    1.30    0.80 
   1   0   5    0.80    1.00 
   1   0   5    2.00    0.80 
   1   0   5    1.20    0.70 
   1   0   5    3.60    0.90 
  -2   0  -5 8500.15  253.47 
  -2   0  -5 8361.06  252.87 
   2   0   5 8459.75  253.27 
  -3   0  -5   73.19    5.10 
  -3   0  -5   70.59    4.60 
  -4   0  -5   64.09    5.10 
  -4   0  -5   61.29    5.50 
  -5   0  -5    8.90    2.60 
  -5   0  -5   10.10    3.10 
  -6   0  -5   19.30    3.90 
  -6   0  -5   17.10    4.10 
  -7   0  -5   -1.10    2.30 
  -8   0  -5    5.70    3.20 
  -9   0  -5    2.80    4.30 
   9  -1  -5    6.40    5.80 
  -9   1   5   -1.40    2.70 
   8  -1  -5   -0.20    4.00 
  -8   1   5   -0.30    2.70 
   7  -1  -5    0.60    3.40 
  -7   1   5    0.40    2.30 
   6  -1  -5    4.30    3.50 
   5  -1  -5    0.40    2.20 
  -5   1   5    0.40    2.20 
   4  -1  -5 1515.85   51.59 
  -4   1   5 1490.05   50.79 
   3  -1  -5    6.50    2.30 
   3  -1  -5   11.20    1.90 
   3  -1  -5   11.50    1.70 
   3  -1  -5    9.00    1.60 
  -3   1   5   12.20    1.90 
  -3   1   5    8.70    2.40 
   2  -1  -5 1327.57   43.10 
   2  -1  -5 1316.57   41.40 
   2  -1  -5 1322.47   41.50 
   2  -1  -5 1320.27   41.30 
   2  -1  -5 1333.07   42.50 
  -2   1   5 1353.96   41.90 
  -2   1   5 1297.17   41.20 
  -2   1   5 1328.97   42.90 
  -2   1   5 1305.67   41.30 
   1  -1  -5  183.18    7.50 
   1  -1  -5  189.48    7.40 
   1  -1  -5  198.98    8.00 
  -1   1   5  186.88    7.40 
  -1   1   5  185.98    7.70 
  -1   1   5  188.18    7.50 
  -1   1   5  197.18    8.30 
   0  -1  -5   67.39    3.70 
   0  -1  -5   65.09    3.40 
   0  -1  -5   64.59    4.20 
   0  -1  -5   65.09    3.50 
   0  -1  -5   67.19    3.10 
   0   1   5   67.39    3.70 
   0   1   5   65.49    3.50 
   0   1   5   68.89    4.40 
   0   1   5   63.79    2.90 
  -1  -1  -5  263.07   10.30 
  -1  -1  -5  256.97    9.30 
  -1  -1  -5  247.78    9.40 
  -1  -1  -5  255.67    9.30 
   1   1   5  260.07   10.30 
  -2  -1  -5  230.68    8.30 
  -2  -1  -5  214.98    8.50 
  -2  -1  -5  228.58    8.40 
   2   1   5  228.98    9.20 
   2   1   5  223.28    8.80 
  -3  -1  -5   13.50    2.00 
  -3  -1  -5   12.50    2.20 
  -4  -1  -5  738.53   26.90 
  -4  -1  -5  777.02   26.40 
  -5  -1  -5    2.80    1.90 
  -5  -1  -5   -2.10    1.90 
  -6  -1  -5  134.59    9.40 
  -6  -1  -5  135.69    9.60 
  -7  -1  -5    5.40    2.60 
  -8  -1  -5    9.00    4.10 
  -9  -1  -5    5.00    3.70 
   9  -2  -5    5.30    5.80 
  -9   2   5    4.10    3.60 
   8  -2  -5   -2.90    3.30 
  -8   2   5    3.30    3.10 
   7  -2  -5    9.40    5.50 
  -7   2   5    7.80    6.00 
   6  -2  -5  188.18   14.00 
  -6   2   5  199.88   13.50 
   5  -2  -5    5.20    3.30 
   4  -2  -5  697.63   25.10 
   4  -2  -5  663.53   27.30 
   4  -2  -5  682.53   23.10 
   4  -2  -5  678.93   23.70 
   4  -2  -5  683.53   23.50 
  -4   2   5  702.63   23.70 
  -4   2   5  673.53   26.70 
   3  -2  -5   25.40    2.40 
   3  -2  -5   23.00    3.90 
   3  -2  -5   24.60    2.70 
   3  -2  -5   21.40    2.60 
   3  -2  -5   20.40    3.20 
  -3   2   5   26.90    2.70 
  -3   2   5   28.30    4.30 
   2  -2  -5   49.60    3.80 
   2  -2  -5   44.40    4.30 
   2  -2  -5   49.99    3.60 
   2  -2  -5   49.00    3.50 
  -2   2   5   46.30    4.00 
  -2   2   5   48.20    3.50 
  -2   2   5   49.99    3.60 
  -2   2   5   46.70    3.40 
  -2   2   5   47.80    4.20 
   1  -2  -5    1.30    1.50 
   1  -2  -5    0.30    0.80 
   1  -2  -5    1.70    1.30 
   1  -2  -5    0.50    1.10 
   1  -2  -5    1.20    1.20 
  -1   2   5    0.50    1.30 
  -1   2   5    1.20    1.00 
  -1   2   5    1.70    1.10 
  -1   2   5    1.10    1.20 
  -1   2   5    0.70    1.10 
   0  -2  -5   29.40    2.80 
   0  -2  -5   31.90    3.50 
   0  -2  -5   37.30    3.00 
   0  -2  -5   33.40    3.00 
   0  -2  -5   36.40    3.90 
   0   2   5   32.10    2.90 
   0   2   5   32.40    3.10 
   0   2   5   33.10    2.30 
   0   2   5   30.20    2.90 
   0   2   5   32.70    3.80 
  -1  -2  -5   -0.10    1.30 
  -1  -2  -5    0.90    0.90 
  -1  -2  -5   -0.70    0.90 
   1   2   5   -0.30    1.30 
   1   2   5    1.10    1.00 
   1   2   5    2.30    1.20 
  -2  -2  -5   63.79    4.00 
  -2  -2  -5   61.09    3.90 
  -2  -2  -5   60.99    4.00 
  -2  -2  -5   56.99    4.20 
   2   2   5   58.49    3.70 
   2   2   5   62.09    4.20 
   2   2   5   61.19    4.80 
  -3  -2  -5   33.20    2.90 
  -3  -2  -5   35.50    3.00 
   3   2   5   24.60    3.40 
  -4  -2  -5  878.31   29.20 
  -4  -2  -5  864.31   29.50 
  -5  -2  -5   -2.20    1.60 
  -5  -2  -5   -1.30    1.40 
  -6  -2  -5  224.38   12.70 
  -6  -2  -5  252.47   13.40 
  -7  -2  -5    8.70    2.80 
  -7  -2  -5    1.50    2.30 
  -8  -2  -5   -3.20    3.40 
  -9  -2  -5    3.50    4.10 
   9  -3  -5    4.50    6.50 
   8  -3  -5    0.30    4.10 
  -8   3   5    5.90    4.00 
   7  -3  -5   18.60    5.80 
  -7   3   5   14.80    4.70 
   6  -3  -5   40.30    7.60 
   6  -3  -5   57.59    7.00 
  -6   3   5   52.49    7.60 
   5  -3  -5   19.10    4.30 
   5  -3  -5   26.50    3.90 
   5  -3  -5   26.80    6.00 
  -5   3   5   23.20    4.70 
   4  -3  -5   13.00    2.90 
   4  -3  -5   12.30    2.60 
   4  -3  -5   15.50    3.60 
   4  -3  -5   14.60    2.50 
   4  -3  -5   11.50    3.70 
  -4   3   5   14.00    3.50 
  -4   3   5   16.80    3.60 
   3  -3  -5   21.90    4.10 
   3  -3  -5   21.90    3.20 
   3  -3  -5   25.90    3.10 
   3  -3  -5   22.60    2.70 
   3  -3  -5   25.10    4.20 
  -3   3   5   20.10    3.80 
  -3   3   5   22.50    2.70 
  -3   3   5   21.60    3.30 
  -3   3   5   24.30    2.90 
   2  -3  -5   20.00    3.70 
   2  -3  -5   22.00    2.70 
   2  -3  -5   18.70    3.50 
   2  -3  -5   20.30    3.10 
  -2   3   5   19.70    2.70 
  -2   3   5   24.90    3.60 
  -2   3   5   21.40    2.70 
  -2   3   5   23.80    3.20 
   1  -3  -5   13.90    2.90 
   1  -3  -5   16.20    2.50 
   1  -3  -5   10.60    2.10 
   1  -3  -5   16.30    3.30 
   1  -3  -5   14.00    2.70 
  -1   3   5   16.00    2.60 
  -1   3   5   18.10    2.70 
  -1   3   5   14.20    3.10 
  -1   3   5   14.80    2.60 
   0  -3  -5   -1.80    0.80 
   0  -3  -5   -0.20    0.90 
   0  -3  -5   -1.30    1.50 
   0  -3  -5   -0.10    1.20 
   0  -3  -5    1.40    1.00 
   0   3   5    0.00    1.00 
   0   3   5   -0.50    1.30 
   0   3   5    1.00    1.40 
   0   3   5   -0.70    0.50 
   0   3   5    0.70    0.90 
  -1  -3  -5   70.59    5.70 
  -1  -3  -5   76.29    5.40 
  -1  -3  -5   74.49    5.00 
  -1  -3  -5   74.09    5.10 
   1   3   5   80.59    5.10 
   1   3   5   69.29    5.10 
   1   3   5   82.39    6.20 
  -2  -3  -5   95.09    6.50 
  -2  -3  -5   98.29    6.10 
  -2  -3  -5   97.79    5.90 
  -2  -3  -5   97.59    6.10 
   2   3   5  100.29    5.80 
   2   3   5  106.39    7.30 
  -3  -3  -5   25.90    3.40 
  -3  -3  -5   32.80    4.90 
   3   3   5   29.40    4.50 
  -4  -3  -5   48.80    4.30 
  -4  -3  -5   46.20    4.60 
   4   3   5   52.19    5.70 
   4   3   5   54.59    4.50 
  -5  -3  -5    5.90    2.00 
   5   3   5    9.30    3.40 
  -6  -3  -5   18.20    3.10 
  -6  -3  -5   24.00    4.00 
  -7  -3  -5    1.80    2.70 
  -7  -3  -5    4.40    2.20 
   7   3   5    5.00    3.10 
  -8  -3  -5   80.69    9.80 
  -9  -3  -5    0.50    4.80 
  -9   4   5   -0.80    3.80 
   8  -4  -5   -2.70    3.50 
  -8   4   5   -4.90    2.40 
   7  -4  -5    5.80    2.70 
   7  -4  -5    5.20    4.10 
   7  -4  -5    6.10    4.10 
  -7   4   5    5.80    3.80 
   6  -4  -5    2.90    2.50 
   6  -4  -5    5.40    3.10 
   6  -4  -5    4.50    3.60 
  -6   4   5    5.00    3.10 
   5  -4  -5    3.90    2.70 
   5  -4  -5    0.90    3.00 
   5  -4  -5   -1.70    1.90 
   5  -4  -5   -2.30    2.10 
  -5   4   5    2.00    2.20 
   4  -4  -5   59.19    6.40 
   4  -4  -5   70.29    7.40 
   4  -4  -5   67.09    6.10 
   4  -4  -5   65.49    5.70 
  -4   4   5   61.59    6.50 
  -4   4   5   63.89    5.30 
   3  -4  -5   95.69    6.40 
   3  -4  -5  100.49    7.30 
   3  -4  -5  114.89    8.30 
   3  -4  -5  104.79    7.10 
  -3   4   5   99.09    6.30 
  -3   4   5  101.39    7.50 
  -3   4   5  104.39    7.60 
  -3   4   5  102.89    6.70 
  -3   4   5   97.69    7.30 
   2  -4  -5   56.79    4.80 
   2  -4  -5   61.79    5.60 
   2  -4  -5   51.69    6.00 
   2  -4  -5   64.39    5.30 
   2  -4  -5   56.59    5.40 
  -2   4   5   55.19    4.90 
  -2   4   5   54.49    5.20 
  -2   4   5   66.69    5.10 
  -2   4   5   57.39    4.90 
   1  -4  -5  134.19    8.10 
   1  -4  -5  130.29    8.30 
   1  -4  -5  130.09    9.00 
   1  -4  -5  136.89    7.80 
   1  -4  -5  133.39    7.50 
  -1   4   5  147.19    9.30 
  -1   4   5  131.69    7.40 
  -1   4   5  127.89    7.60 
  -1   4   5  131.89    7.80 
  -1   4   5  129.99    7.00 
   0  -4  -5   12.70    2.90 
   0  -4  -5    8.80    3.20 
   0  -4  -5   10.20    2.60 
   0   4   5    8.90    3.10 
  -1  -4  -5  413.16   17.00 
  -1  -4  -5  425.26   17.60 
  -1  -4  -5  438.66   18.10 
  -1  -4  -5  407.46   18.50 
   1   4   5  417.56   17.60 
   1   4   5  427.76   17.20 
   1   4   5  429.36   18.90 
  -2  -4  -5   42.70    4.80 
  -2  -4  -5   45.50    4.50 
  -2  -4  -5   43.10    4.50 
  -2  -4  -5   36.00    4.50 
   2   4   5   49.80    5.20 
   2   4   5   45.00    5.40 
   2   4   5   39.10    4.10 
  -3  -4  -5   11.20    2.90 
  -3  -4  -5   16.40    3.50 
  -3  -4  -5   13.70    3.00 
  -3  -4  -5    6.20    2.50 
   3   4   5   11.50    3.40 
   3   4   5    9.90    2.40 
   3   4   5    9.40    2.90 
  -4  -4  -5   49.80    5.10 
  -4  -4  -5   46.60    4.90 
   4   4   5   47.00    8.90 
   4   4   5   41.90    6.10 
  -5  -4  -5    3.10    2.10 
  -5  -4  -5    2.20    1.90 
   5   4   5    0.30    2.80 
   5   4   5    4.10    2.90 
  -6  -4  -5    7.60    2.10 
  -6  -4  -5    1.70    2.40 
   6   4   5    4.10    3.10 
   6   4   5    0.70    3.10 
  -7  -4  -5    5.40    2.60 
   7   4   5    9.90    3.90 
   7   4   5   -1.70    3.80 
  -8  -4  -5    6.80    3.60 
   8  -5  -5   11.50    6.00 
  -8   5   5    0.30    2.40 
   7  -5  -5   -6.30    3.40 
   7  -5  -5   -5.90    2.80 
   7  -5  -5   -0.30    3.10 
  -7   5   5   -2.20    2.30 
   6  -5  -5    3.40    3.50 
   6  -5  -5    0.20    3.10 
   6  -5  -5    0.30    2.60 
   6  -5  -5    4.50    2.60 
  -6   5   5    0.00    2.10 
   5  -5  -5    4.50    2.70 
   5  -5  -5    4.70    2.80 
   5  -5  -5    4.60    4.00 
  -5   5   5    6.10    2.60 
  -5   5   5    7.10    3.40 
   4  -5  -5   25.10    5.50 
   4  -5  -5   18.50    4.00 
   4  -5  -5   22.90    5.40 
   4  -5  -5   20.80    4.40 
  -4   5   5   25.40    4.70 
  -4   5   5   21.70    4.30 
  -4   5   5   26.90    4.10 
   3  -5  -5   -0.30    2.10 
   3  -5  -5    1.50    2.50 
   3  -5  -5    0.90    1.50 
   3  -5  -5   -3.30    2.10 
  -3   5   5    2.70    1.80 
  -3   5   5    3.60    2.30 
  -3   5   5   -2.60    1.80 
  -3   5   5   -0.40    2.40 
   2  -5  -5  189.38   11.70 
   2  -5  -5  176.28   11.50 
   2  -5  -5  189.68   11.20 
   2  -5  -5  185.88   12.30 
   2  -5  -5  200.78   11.10 
  -2   5   5  186.58   10.70 
  -2   5   5  182.58   10.20 
  -2   5   5  182.18   10.40 
  -2   5   5  191.28   11.90 
  -2   5   5  176.98   10.20 
   1  -5  -5   15.60    3.30 
   1  -5  -5   19.30    4.50 
   1  -5  -5   18.10    3.70 
  -1   5   5   16.70    3.70 
  -1   5   5   25.40    4.00 
  -1   5   5   18.50    4.60 
  -1   5   5   17.40    3.00 
  -1   5   5   17.80    3.40 
   0  -5  -5   50.19    5.40 
   0  -5  -5   39.30    5.70 
   0  -5  -5   45.40    4.90 
   0  -5  -5   45.50    5.30 
   0   5   5   43.50    4.90 
   0   5   5   48.30    5.40 
   0   5   5   45.90    4.10 
   0   5   5   48.60    3.80 
   0   5   5   50.69    6.30 
  -1  -5  -5   48.90    5.60 
  -1  -5  -5   48.80    5.50 
  -1  -5  -5   46.70    5.80 
  -1  -5  -5   48.70    5.10 
   1   5   5   49.00    6.30 
   1   5   5   46.90    5.40 
   1   5   5   46.50    4.90 
  -2  -5  -5  346.47   16.50 
  -2  -5  -5  315.57   16.80 
  -2  -5  -5  320.47   16.00 
  -2  -5  -5  324.57   15.30 
   2   5   5  323.57   17.40 
   2   5   5  315.77   15.80 
   2   5   5  325.17   15.20 
  -3  -5  -5    2.10    2.20 
  -3  -5  -5    1.30    2.00 
  -3  -5  -5   -0.50    1.70 
   3   5   5    4.10    2.40 
   3   5   5    2.70    3.10 
  -4  -5  -5   87.79    8.20 
  -4  -5  -5   85.39    7.50 
  -4  -5  -5   85.49    7.10 
   4   5   5   87.49    9.30 
   4   5   5   88.99    8.40 
  -5  -5  -5   10.40    3.20 
  -5  -5  -5   11.70    3.50 
   5   5   5    6.30    3.90 
  -6  -5  -5    3.40    3.00 
  -6  -5  -5    7.00    3.00 
   6   5   5    8.90    4.40 
   6   5   5    6.60    3.80 
  -7  -5  -5    3.60    2.60 
   7   5   5    3.70    5.30 
   7   5   5    6.50    4.60 
   8   5   5    7.60    4.20 
   8  -6  -5   -2.40    7.20 
  -8   6   5    3.80    3.60 
   7  -6  -5    2.70    5.10 
  -7   6   5    2.10    2.50 
   6  -6  -5   -1.90    2.80 
   6  -6  -5    4.60    4.70 
  -6   6   5    1.50    2.70 
   5  -6  -5   -4.00    2.30 
   5  -6  -5   -1.30    3.20 
  -5   6   5    4.00    2.20 
  -5   6   5    1.00    2.40 
   4  -6  -5   34.90    5.30 
   4  -6  -5   36.80    6.20 
  -4   6   5   33.00    5.10 
  -4   6   5   41.90    8.30 
  -4   6   5   31.90    5.80 
   3  -6  -5    3.10    2.40 
   3  -6  -5    5.10    3.60 
  -3   6   5    6.30    2.60 
  -3   6   5    8.60    3.10 
  -3   6   5    6.20    3.60 
   2  -6  -5   75.69    8.80 
   2  -6  -5   87.39    7.90 
   2  -6  -5   77.49    6.90 
  -2   6   5   81.19   10.40 
  -2   6   5   76.19    6.60 
  -2   6   5   87.49    7.30 
  -2   6   5   82.09    7.40 
   1  -6  -5    2.60    3.10 
   1  -6  -5    2.90    3.10 
   1  -6  -5    3.40    2.60 
   1  -6  -5    2.50    2.10 
  -1   6   5    4.90    2.50 
  -1   6   5    6.10    2.20 
  -1   6   5    6.10    3.00 
  -1   6   5    4.00    2.60 
  -1   6   5    1.20    2.10 
   0  -6  -5   -1.20    2.10 
   0  -6  -5    1.10    2.10 
   0  -6  -5    1.10    1.90 
   0  -6  -5    1.10    2.00 
   0   6   5    0.20    2.70 
   0   6   5   -0.20    1.30 
   0   6   5    0.20    1.60 
   0   6   5   -3.20    2.00 
   0   6   5    3.50    2.10 
  -1  -6  -5    3.20    2.60 
  -1  -6  -5    3.30    2.70 
  -1  -6  -5    2.30    2.20 
  -1  -6  -5    2.70    2.70 
   1   6   5    2.10    3.00 
   1   6   5   -1.30    2.40 
   1   6   5    7.70    3.60 
  -2  -6  -5   30.40    5.80 
  -2  -6  -5   30.70    5.60 
  -2  -6  -5   29.40    5.40 
   2   6   5   26.20    5.90 
   2   6   5   22.90    5.40 
   2   6   5   31.30    5.30 
  -3  -6  -5    1.40    2.60 
  -3  -6  -5    0.10    2.60 
  -3  -6  -5    3.10    2.50 
   3   6   5    4.40    3.80 
   3   6   5    1.80    3.10 
  -4  -6  -5   11.60    3.80 
  -4  -6  -5    9.00    3.50 
  -4  -6  -5    6.20    3.30 
   4   6   5    8.90    4.50 
  -5  -6  -5    3.80    3.40 
  -5  -6  -5    9.70    3.40 
   5   6   5    3.40    3.80 
   5   6   5    4.10    3.80 
  -6  -6  -5    1.50    3.20 
  -6  -6  -5    2.60    3.00 
   6   6   5    4.50    4.00 
   6   6   5   -1.90    3.90 
  -7  -6  -5   -2.20    2.40 
  -7  -6  -5   -1.10    4.30 
   7   6   5    5.50    5.40 
   7   6   5   -4.20    5.30 
   8   6   5    1.60    4.30 
   7  -7  -5    7.90    7.40 
   7  -7  -5    4.50    3.50 
  -7   7   5   -2.70    2.40 
   6  -7  -5    7.10    3.70 
   6  -7  -5   -1.00    6.20 
   6  -7  -5    3.40    4.20 
  -6   7   5    5.90    3.40 
  -6   7   5    8.10    3.90 
   5  -7  -5   -1.10    3.30 
   5  -7  -5    2.00    3.10 
   5  -7  -5    1.90    3.10 
  -5   7   5    3.60    3.00 
  -5   7   5    3.10    2.90 
   4  -7  -5   87.39    9.50 
   4  -7  -5   98.39   11.20 
  -4   7   5   98.29    9.80 
  -4   7   5   74.29    8.30 
  -4   7   5   84.39    8.70 
   3  -7  -5    2.80    2.60 
   3  -7  -5   -5.30    2.90 
   3  -7  -5   -2.10    2.40 
  -3   7   5    1.70    2.50 
  -3   7   5   -2.10    2.10 
  -3   7   5    3.00    3.30 
   2  -7  -5    6.60    4.20 
   2  -7  -5    8.00    3.10 
   2  -7  -5    4.50    3.50 
  -2   7   5    7.70    4.10 
  -2   7   5    2.30    2.10 
  -2   7   5    8.10    3.10 
   1  -7  -5   -3.00    1.90 
   1  -7  -5   -2.70    1.60 
   1  -7  -5    1.90    3.00 
  -1   7   5   -1.00    2.20 
  -1   7   5   -0.90    2.80 
  -1   7   5    0.20    2.70 
  -1   7   5   -2.50    2.10 
   0  -7  -5    0.40    2.90 
   0  -7  -5    1.60    2.40 
   0  -7  -5    2.50    2.80 
   0  -7  -5   -1.60    2.00 
   0   7   5    0.30    1.70 
   0   7   5    4.10    2.50 
   0   7   5   -2.00    2.50 
   0   7   5    2.90    2.60 
   0   7   5    1.20    2.70 
  -1  -7  -5    3.70    2.80 
  -1  -7  -5    1.90    2.80 
   1   7   5    8.80    3.30 
   1   7   5   -1.90    2.50 
   1   7   5   -0.10    2.60 
  -2  -7  -5   -3.90    3.10 
  -2  -7  -5    2.20    3.10 
   2   7   5   -5.00    3.00 
   2   7   5    7.60    4.30 
  -3  -7  -5   10.70    3.70 
  -3  -7  -5    8.50    4.50 
  -3  -7  -5   13.90    4.20 
   3   7   5   14.20    5.50 
   3   7   5    1.70    4.20 
  -4  -7  -5   10.00    3.90 
  -4  -7  -5   14.70    4.90 
   4   7   5   10.90    5.20 
  -5  -7  -5   -4.30    3.20 
  -5  -7  -5   -1.10    2.60 
   5   7   5   -2.40    4.20 
  -6  -7  -5   -1.60    3.80 
  -6  -7  -5    6.30    5.00 
   6   7   5   13.20    5.70 
   6   7   5   -5.80    4.70 
  -7  -7  -5   -0.40    4.70 
  -7  -7  -5    1.00    2.80 
   7   7   5    3.00    6.30 
   7  -8  -5    1.00    3.60 
  -7   8   5    5.60    4.50 
   6  -8  -5    6.70    3.50 
  -6   8   5    0.70    3.40 
  -6   8   5    5.40    3.50 
   5  -8  -5    2.90    4.20 
   5  -8  -5    0.90    5.00 
   5  -8  -5    3.90    4.00 
  -5   8   5    1.40    4.00 
  -5   8   5    1.90    3.10 
  -5   8   5    7.00    4.20 
   4  -8  -5   -5.60    3.40 
   4  -8  -5   -5.20    2.90 
   4  -8  -5    8.20    5.50 
  -4   8   5   -3.90    2.40 
  -4   8   5    5.50    3.60 
  -4   8   5    9.50    3.90 
   3  -8  -5    0.70    2.90 
   3  -8  -5   -5.00    4.60 
   3  -8  -5   -3.80    2.60 
  -3   8   5    4.40    3.80 
  -3   8   5    2.70    3.60 
  -3   8   5    3.70    2.30 
   2  -8  -5   11.30    5.40 
   2  -8  -5   10.10    4.90 
   2  -8  -5   19.30    5.30 
  -2   8   5   12.80    4.20 
  -2   8   5   11.20    3.20 
  -2   8   5   14.20    5.50 
   1  -8  -5   -2.00    2.20 
   1  -8  -5   -1.20    2.70 
   1  -8  -5    3.50    3.50 
  -1   8   5   -5.40    2.80 
  -1   8   5    0.80    2.40 
  -1   8   5   -1.40    1.70 
  -1   8   5    0.60    2.80 
   0  -8  -5    9.90    4.30 
   0  -8  -5    9.50    3.90 
   0  -8  -5    2.70    3.80 
   0   8   5   14.90    3.60 
   0   8   5    4.20    4.20 
   0   8   5   18.90    4.20 
   0   8   5    9.30    2.90 
  -1  -8  -5   -1.70    2.60 
  -1  -8  -5   -0.50    2.60 
  -1  -8  -5    4.50    3.20 
   1   8   5    1.90    4.20 
   1   8   5    0.80    2.80 
   1   8   5    0.70    2.70 
  -2  -8  -5   11.90    4.40 
  -2  -8  -5    2.60    3.30 
  -2  -8  -5    1.00    3.20 
   2   8   5   -2.50    3.60 
   2   8   5    7.70    4.20 
  -3  -8  -5    0.80    2.90 
  -3  -8  -5   -1.30    4.00 
  -3  -8  -5    2.60    3.50 
   3   8   5    6.00    4.10 
   3   8   5   -2.50    4.80 
  -4  -8  -5   -1.80    2.90 
  -4  -8  -5   -0.20    2.90 
   4   8   5   13.60    5.40 
   4   8   5   -3.50    4.20 
  -5  -8  -5    1.60    4.20 
  -5  -8  -5   -4.90    2.70 
   5   8   5    0.40    6.60 
   5   8   5    0.90    4.60 
   6  -9  -5    0.30    4.60 
  -6   9   5    1.80    3.30 
   5  -9  -5   -4.10    3.60 
  -5   9   5   -5.20    2.50 
   4  -9  -5    2.20    4.40 
   4  -9  -5   -3.70    4.10 
   4  -9  -5   10.30    7.00 
  -4   9   5    5.60    4.10 
  -4   9   5   -1.30    2.80 
  -4   9   5   -7.00    3.10 
   3  -9  -5   -0.10    3.50 
   3  -9  -5    6.50    5.70 
   3  -9  -5   -3.00    4.20 
  -3   9   5   -3.80    3.10 
  -3   9   5    2.40    3.90 
  -3   9   5    3.40    3.70 
   2  -9  -5    0.70    3.20 
   2  -9  -5    3.60    4.40 
  -2   9   5    0.60    2.30 
  -2   9   5   -0.70    3.40 
  -2   9   5    8.00    3.10 
   1  -9  -5    6.10    4.90 
   1  -9  -5    1.50    3.50 
  -1   9   5   10.40    4.20 
  -1   9   5    4.90    2.90 
  -1   9   5   12.30    5.60 
   0  -9  -5    5.30    3.40 
   0  -9  -5    2.90    4.80 
   0  -9  -5   -2.10    2.90 
   0   9   5    1.90    2.90 
   0   9   5    1.90    4.20 
   0   9   5   -6.50    3.30 
  -1  -9  -5   24.70    7.10 
  -1  -9  -5   33.50    8.00 
  -1  -9  -5   21.50    6.00 
   1   9   5   20.10    7.10 
  -2  -9  -5    2.90    3.70 
  -2  -9  -5    6.40    4.40 
   2   9   5    2.60    4.30 
   2   9   5   -5.80    3.90 
  -3  -9  -5   -8.90    3.70 
  -3  -9  -5    3.80    3.40 
  -3  -9  -5   12.20    4.70 
   3   9   5   -3.40    3.70 
   3   9   5   -8.80    4.50 
  -4  -9  -5    4.10    4.90 
   4   9   5   -5.20    4.60 
  -5  -9  -5   -2.70    4.10 
   5 -10  -5   -0.40    5.10 
  -5  10   5    3.10    3.80 
   4 -10  -5   -2.60    4.30 
  -4  10   5   -0.80    3.00 
   3 -10  -5    3.10    4.60 
   3 -10  -5    3.20    4.60 
  -3  10   5    0.00    3.30 
   2 -10  -5   -2.30    3.90 
  -2  10   5    2.50    2.80 
  -2  10   5   -3.10    5.00 
   1 -10  -5    0.80    4.30 
   1 -10  -5   -7.30    3.30 
  -1  10   5    7.70    5.20 
  -1  10   5   -2.70    2.80 
   0 -10  -5    3.20    4.40 
   0 -10  -5    5.50    4.30 
   0  10   5    7.40    5.50 
   0  10   5   -2.90    2.50 
  -1 -10  -5    0.00    4.30 
  -1 -10  -5   -1.80    3.90 
  -1 -10  -5   -5.90    2.70 
   1  10   5    4.20    4.90 
   1  10   5    2.30    5.00 
  -2 -10  -5    0.50    5.20 
  -2 -10  -5    2.50    4.00 
  -3 -10  -5   -0.70    4.80 
   3  10   5    1.50    5.50 
  -4 -10  -5    0.90    5.10 
   4  10   5   -3.50    5.80 
   3 -11  -5   13.30    7.10 
   2 -11  -5   -6.10    5.30 
   2 -11  -5    2.90    4.80 
  -2  11   5    0.10    3.90 
   1 -11  -5   -6.60    4.60 
   1 -11  -5    6.90    4.40 
  -1  11   5    4.10    3.60 
  -1  11   5   -0.10    6.90 
   0 -11  -5   -4.00    4.80 
   0 -11  -5    2.00    4.90 
   0  11   5    8.30    7.60 
   0  11   5   -1.40    3.60 
  -1 -11  -5    9.60    5.00 
   1  11   5   -0.90    5.40 
  -2 -11  -5   -8.70    4.60 
   2  11   5   -6.80    4.50 
  -3 -11  -5    2.10    6.00 
   3  11  -6   -2.80    5.10 
  -3 -11   6   -2.80    5.10 
   2  11  -6   11.90    4.20 
   2  11  -6   -1.70    5.70 
  -2 -11   6    8.10    6.20 
   1  11  -6   -2.80    5.30 
   1  11  -6   -0.60    4.10 
  -1 -11   6   -9.40    5.50 
   0  11  -6   -5.70    5.10 
   0 -11   6    0.40    5.50 
   0 -11   6    2.90    5.30 
  -1  11  -6   -4.80    4.50 
  -1  11  -6    3.10    6.10 
   1 -11   6  -10.30    5.40 
   1 -11   6   -3.40    5.20 
  -2  11  -6   10.60    5.40 
   2 -11   6   21.10    8.20 
   2 -11   6   12.60    7.40 
  -3  11  -6    1.30    4.10 
   3 -11   6   -8.50    4.30 
  -4 -10   6   -1.00    4.10 
   3  10  -6   -7.80    4.60 
   3  10  -6   -3.30    3.50 
  -3 -10   6   19.30    6.50 
   2  10  -6    3.10    4.10 
   2  10  -6    3.10    3.50 
  -2 -10   6   -1.70    4.10 
  -2 -10   6   -3.10    4.20 
   1  10  -6    0.50    4.70 
   1  10  -6    3.30    4.30 
  -1 -10   6   11.00    4.60 
  -1 -10   6   -2.60    5.50 
   0  10  -6   -5.70    4.10 
   0  10  -6    4.30    4.20 
   0 -10   6    6.40    4.10 
   0 -10   6   -2.60    4.10 
  -1  10  -6   -4.70    3.50 
  -1  10  -6    1.50    5.70 
  -1  10  -6    2.80    4.50 
   1 -10   6   -1.10    4.40 
   1 -10   6    5.30    4.40 
  -2  10  -6   -2.30    3.10 
  -2  10  -6    9.60    4.70 
   2 -10   6   -5.30    4.00 
  -3  10  -6    9.50    4.40 
   3 -10   6   10.60    7.20 
   3 -10   6   17.00    5.50 
  -4  10  -6    6.80    4.30 
   4 -10   6    6.50    7.50 
  -5  10  -6   -0.60    3.40 
   5   9  -6   -1.20    6.80 
  -5  -9   6    8.50    6.80 
   4   9  -6    8.00    8.00 
   4   9  -6    3.60    5.80 
  -4  -9   6   -1.80    3.90 
   3   9  -6   17.40    4.60 
   3   9  -6   20.90    9.20 
  -3  -9   6   20.60    3.70 
  -3  -9   6   25.30    6.70 
  -3  -9   6   15.10    7.20 
   2   9  -6   26.40    7.60 
   2   9  -6   12.20    4.20 
  -2  -9   6   20.30    4.00 
  -2  -9   6   14.70    5.90 
  -2  -9   6   11.60    5.60 
   1   9  -6   14.70    6.60 
   1   9  -6    8.10    4.90 
  -1  -9   6    6.60    4.40 
  -1  -9   6   16.40    5.10 
   0   9  -6   -1.40    3.10 
   0   9  -6    4.80    4.20 
   0  -9   6    4.30    3.60 
   0  -9   6   -1.60    3.80 
  -1   9  -6   24.10    6.10 
  -1   9  -6   13.70    5.80 
   1  -9   6   25.80    6.90 
   1  -9   6   26.90    5.80 
  -2   9  -6   24.80    7.30 
  -2   9  -6   25.80    5.80 
  -2   9  -6   26.70    6.50 
   2  -9   6   20.90    5.90 
   2  -9   6   22.80    7.00 
  -3   9  -6   14.40    5.10 
  -3   9  -6   -0.20    3.20 
   3  -9   6   -5.90    3.50 
   3  -9   6   11.70    5.30 
   3  -9   6    1.40    4.10 
  -4   9  -6   33.00    7.80 
  -4   9  -6   19.80    5.60 
   4  -9   6   32.40   10.20 
   4  -9   6   34.00    9.00 
  -5   9  -6   -1.00    2.90 
   5  -9   6    1.30    4.70 
  -6   9  -6    4.60    3.90 
   6  -9   6   -5.70    4.80 
   6   8  -6    4.00    5.30 
  -6  -8   6   -2.10    4.30 
   5   8  -6    6.60    6.50 
   5   8  -6    9.90    6.90 
  -5  -8   6    8.20    5.50 
   4   8  -6   12.20    6.40 
   4   8  -6   15.90    6.50 
  -4  -8   6   14.00    5.90 
  -4  -8   6   14.60    6.10 
   3   8  -6   15.10    6.40 
   3   8  -6   21.80    4.30 
   3   8  -6   25.20    6.90 
  -3  -8   6   23.00    6.00 
  -3  -8   6   23.80    3.90 
  -3  -8   6   15.80    5.60 
   2   8  -6   25.50    6.90 
   2   8  -6   27.80    6.90 
   2   8  -6   34.70    5.80 
  -2  -8   6   24.40    5.60 
  -2  -8   6   36.60    5.00 
  -2  -8   6   28.30    7.10 
   1   8  -6   13.80    5.50 
  -1  -8   6   28.20    6.90 
  -1  -8   6   12.70    3.20 
  -1  -8   6   14.90    4.90 
   0   8  -6  295.67   20.40 
   0   8  -6  279.47   22.80 
   0   8  -6  232.88   14.90 
   0  -8   6  286.07   24.60 
   0  -8   6  286.77   20.60 
   0  -8   6  288.87   17.20 
  -1   8  -6   56.99    9.60 
  -1   8  -6   57.79    7.20 
  -1   8  -6   45.30    7.30 
   1  -8   6   56.99    9.20 
   1  -8   6   62.59    7.50 
  -2   8  -6  187.78   12.90 
  -2   8  -6  202.18   14.90 
  -2   8  -6  190.18   16.20 
   2  -8   6  176.58   15.70 
   2  -8   6  182.78   14.10 
   2  -8   6  204.28   16.00 
  -3   8  -6   -3.50    3.20 
  -3   8  -6    5.90    3.60 
  -3   8  -6   -1.50    3.30 
   3  -8   6    1.20    3.40 
   3  -8   6   -4.50    4.20 
   3  -8   6    7.60    3.90 
  -4   8  -6    6.40    3.30 
  -4   8  -6    4.90    3.60 
   4  -8   6    5.30    4.10 
   4  -8   6   11.90    3.90 
   4  -8   6   -0.90    4.70 
  -5   8  -6   -0.20    2.30 
  -5   8  -6    5.90    4.60 
  -5   8  -6    5.10    3.60 
   5  -8   6    2.80    4.40 
   5  -8   6   -4.50    3.20 
  -6   8  -6    2.60    3.60 
  -6   8  -6    2.50    2.50 
   6  -8   6    6.30    3.80 
   6  -8   6   -3.20    8.00 
  -7   8  -6   -0.80    2.40 
   7  -8   6   -4.20    4.40 
  -7  -7   6    0.10    3.80 
   6   7  -6    3.90    4.30 
   6   7  -6   -5.80    4.90 
  -6  -7   6    4.50    2.90 
   5   7  -6   15.00    7.10 
   5   7  -6   16.80    6.00 
  -5  -7   6    8.60    2.60 
  -5  -7   6   18.80    5.60 
  -5  -7   6   11.50    4.60 
   4   7  -6    4.60    5.10 
   4   7  -6    1.60    3.60 
   4   7  -6   -1.20    2.50 
  -4  -7   6   -1.70    1.50 
  -4  -7   6    3.30    4.30 
  -4  -7   6    2.20    3.20 
   3   7  -6   29.30    6.60 
   3   7  -6   25.50    4.40 
   3   7  -6   28.40    7.30 
  -3  -7   6   20.20    3.30 
  -3  -7   6   25.50    5.60 
  -3  -7   6   25.00    5.60 
   2   7  -6   85.69    9.60 
   2   7  -6   63.99    5.90 
   2   7  -6   77.29   10.50 
  -2  -7   6   68.49    8.30 
  -2  -7   6   59.89    5.60 
  -2  -7   6   80.89    9.30 
   1   7  -6    8.90    3.80 
   1   7  -6    9.70    3.80 
   1   7  -6    9.90    5.20 
   1   7  -6   -1.00    5.90 
  -1  -7   6    4.60    3.60 
  -1  -7   6    4.30    3.30 
   0   7  -6  180.38   12.80 
   0   7  -6  187.58   14.90 
   0   7  -6  176.88   11.00 
   0  -7   6  164.58   10.30 
   0  -7   6  171.08   13.50 
   0  -7   6  179.78   12.40 
  -1   7  -6   22.50    5.30 
  -1   7  -6   19.40    4.20 
  -1   7  -6   24.90    6.40 
   1  -7   6   22.80    5.00 
   1  -7   6   28.40    7.00 
   1  -7   6   15.10    5.30 
  -2   7  -6   14.90    4.80 
  -2   7  -6    8.80    3.70 
  -2   7  -6   22.50    6.00 
   2  -7   6   13.70    4.40 
   2  -7   6   10.90    4.40 
   2  -7   6   16.60    5.60 
  -3   7  -6    1.20    2.30 
  -3   7  -6    3.00    3.50 
  -3   7  -6    1.10    2.70 
   3  -7   6    4.20    3.00 
   3  -7   6    7.50    4.10 
   3  -7   6    7.10    4.00 
  -4   7  -6    2.20    2.80 
  -4   7  -6    1.20    2.40 
  -4   7  -6    3.90    3.20 
   4  -7   6    2.90    3.30 
   4  -7   6   -5.60    3.00 
   4  -7   6   -3.30    2.70 
  -5   7  -6    5.90    3.20 
  -5   7  -6    7.90    3.50 
   5  -7   6    9.80    4.40 
   5  -7   6    9.20    4.80 
   5  -7   6    6.00    4.30 
  -6   7  -6    7.20    3.30 
  -6   7  -6    1.80    3.00 
   6  -7   6   -7.90    3.60 
   6  -7   6    3.30    3.10 
   6  -7   6   -6.70    3.60 
  -7   7  -6    0.30    2.90 
   7  -7   6    7.90    5.40 
   8   6  -6    6.80    5.70 
  -8  -6   6   -5.60    2.90 
   7   6  -6    1.60    4.10 
   7   6  -6    7.20    4.90 
   7   6  -6    5.70    4.40 
  -7  -6   6    1.10    2.60 
   6   6  -6    7.10    4.10 
   6   6  -6    2.20    4.10 
  -6  -6   6   -1.30    3.00 
   5   6  -6    2.50    3.50 
   5   6  -6    4.70    2.50 
  -5  -6   6    3.00    2.80 
  -5  -6   6    1.90    2.20 
  -5  -6   6   -0.70    2.30 
   4   6  -6    6.20    3.10 
   4   6  -6   12.10    4.60 
   4   6  -6    6.30    4.10 
  -4  -6   6   14.30    4.30 
  -4  -6   6   10.40    3.90 
  -4  -6   6   13.70    2.70 
   3   6  -6    2.90    3.10 
   3   6  -6    4.20    3.40 
   3   6  -6    2.20    2.40 
  -3  -6   6    1.80    1.90 
  -3  -6   6    8.10    3.50 
  -3  -6   6    4.90    2.90 
   2   6  -6    4.10    3.70 
   2   6  -6    8.10    3.80 
   2   6  -6    8.00    2.90 
   2   6  -6   16.60    3.10 
  -2  -6   6   14.80    4.40 
  -2  -6   6   11.50    2.40 
  -2  -6   6    9.20    3.50 
   1   6  -6    6.40    2.20 
   1   6  -6    6.60    3.90 
   1   6  -6    5.20    2.90 
   1   6  -6    8.40    3.40 
  -1  -6   6    6.50    3.20 
  -1  -6   6    9.00    2.10 
  -1  -6   6   11.80    3.70 
  -1  -6   6    3.60    2.30 
   0   6  -6    5.20    2.60 
   0   6  -6    4.40    2.70 
   0   6  -6    5.00    2.40 
   0   6  -6    7.20    2.70 
   0  -6   6    3.50    2.80 
   0  -6   6    6.10    2.80 
   0  -6   6    1.60    2.90 
   0  -6   6    2.30    1.80 
  -1   6  -6    9.50    2.70 
  -1   6  -6    8.50    3.30 
  -1   6  -6    8.30    3.80 
   1  -6   6    5.60    3.90 
   1  -6   6   10.50    4.00 
   1  -6   6   11.30    2.70 
   1  -6   6   10.40    3.40 
  -2   6  -6   54.29    7.10 
  -2   6  -6   47.70    6.20 
  -2   6  -6   46.30    5.40 
   2  -6   6   43.80    6.80 
   2  -6   6   57.99    6.10 
  -3   6  -6    7.50    3.20 
  -3   6  -6    5.00    2.70 
  -3   6  -6    5.20    3.20 
   3  -6   6    2.80    3.10 
   3  -6   6    5.50    3.60 
  -4   6  -6   24.50    5.30 
  -4   6  -6   34.10    5.50 
  -4   6  -6   33.10    5.60 
   4  -6   6   31.20    5.40 
   4  -6   6   25.80    5.50 
  -5   6  -6    4.20    2.90 
  -5   6  -6    6.50    3.30 
   5  -6   6    1.10    3.40 
   5  -6   6    7.30    3.50 
   5  -6   6   14.10    5.30 
  -6   6  -6    8.90    2.90 
  -6   6  -6    6.90    3.30 
   6  -6   6   11.00    4.60 
   6  -6   6    2.30    3.20 
  -7   6  -6    6.00    2.50 
   7  -6   6    3.60    4.30 
   7  -6   6    0.10    3.80 
  -8   6  -6    0.80    3.10 
   8  -6   6   -7.60    3.60 
   8  -6   6    4.60    6.30 
   8   5  -6   -6.00    3.80 
   8   5  -6    2.10    4.40 
   8   5  -6   12.00    6.10 
   7   5  -6   -0.10    4.10 
   7   5  -6    8.30    4.00 
   7   5  -6    3.80    3.80 
  -7  -5   6    7.00    3.10 
   6   5  -6    6.80    4.20 
   6   5  -6    0.00    2.80 
  -6  -5   6    3.50    2.30 
  -6  -5   6    5.50    2.40 
   5   5  -6    1.50    2.80 
   5   5  -6    9.20    4.10 
   5   5  -6    7.50    3.50 
  -5  -5   6    1.30    2.40 
  -5  -5   6   -2.80    2.20 
   4   5  -6    9.10    3.00 
   4   5  -6   14.20    4.40 
  -4  -5   6   16.20    4.00 
  -4  -5   6   12.10    3.10 
   3   5  -6   -0.20    2.10 
   3   5  -6    0.00    2.60 
   3   5  -6    0.80    2.50 
  -3  -5   6   -2.30    1.60 
  -3  -5   6   -1.60    2.20 
  -3  -5   6    2.60    1.90 
   2   5  -6   20.00    4.90 
   2   5  -6   17.00    4.40 
   2   5  -6   19.80    3.20 
  -2  -5   6   25.00    4.70 
  -2  -5   6   20.60    2.80 
  -2  -5   6   23.50    4.70 
  -2  -5   6   29.10    4.60 
   1   5  -6   31.40    4.10 
   1   5  -6   28.70    5.60 
   1   5  -6   24.50    4.80 
   1   5  -6   40.80    4.50 
  -1  -5   6   34.30    4.50 
  -1  -5   6   28.60    3.20 
  -1  -5   6   30.30    5.30 
  -1  -5   6   23.90    4.80 
   0   5  -6   27.80    3.40 
   0   5  -6   26.60    4.40 
   0   5  -6   36.70    5.10 
   0   5  -6   40.00    4.80 
   0  -5   6   37.90    4.70 
   0  -5   6   33.20    3.50 
   0  -5   6   35.10    5.00 
   0  -5   6   37.00    6.50 
  -1   5  -6   12.90    3.30 
  -1   5  -6   15.00    2.80 
  -1   5  -6   15.00    3.70 
  -1   5  -6   11.20    2.80 
   1  -5   6   14.80    3.50 
   1  -5   6    6.00    3.40 
   1  -5   6   14.50    3.90 
   1  -5   6   10.90    2.40 
  -2   5  -6    9.10    2.60 
  -2   5  -6   12.60    3.50 
  -2   5  -6   12.90    3.30 
  -2   5  -6   13.90    3.20 
  -2   5  -6    8.80    2.60 
   2  -5   6   11.30    4.20 
   2  -5   6   10.40    3.70 
   2  -5   6   12.50    2.90 
   2  -5   6   10.60    3.20 
  -3   5  -6    3.30    2.30 
  -3   5  -6    4.80    2.10 
  -3   5  -6    6.30    2.70 
   3  -5   6    2.70    2.00 
   3  -5   6    5.40    2.90 
  -4   5  -6   62.59    6.80 
  -4   5  -6   62.09    6.10 
   4  -5   6   61.49    6.60 
   4  -5   6   65.89    7.50 
   4  -5   6   72.69    7.00 
  -5   5  -6    4.20    2.50 
  -5   5  -6    5.00    2.40 
   5  -5   6    0.90    3.00 
   5  -5   6    5.10    2.80 
   5  -5   6    1.70    2.30 
  -6   5  -6   47.90    7.00 
  -6   5  -6   37.50    4.80 
   6  -5   6   42.50    7.00 
   6  -5   6   41.30    6.00 
  -7   5  -6   -1.20    2.30 
   7  -5   6   -4.10    2.40 
   7  -5   6    1.10    3.70 
  -8   5  -6    1.20    3.20 
   8  -5   6    8.40    4.40 
   8  -5   6    3.40    5.30 
   8   4  -6    4.80    4.40 
   8   4  -6   -3.60    4.60 
   8   4  -6    3.10    4.20 
   7   4  -6   -1.30    3.70 
   7   4  -6    0.80    3.20 
   7   4  -6    0.40    2.90 
   6   4  -6   13.30    3.90 
   6   4  -6    9.00    4.30 
   6   4  -6    1.80    3.30 
  -6  -4   6   13.30    3.00 
  -6  -4   6    8.10    3.40 
   5   4  -6    3.10    2.90 
   5   4  -6   -0.90    2.20 
   5   4  -6    2.70    3.10 
  -5  -4   6    2.20    2.00 
  -5  -4   6    1.70    2.10 
   4   4  -6  121.49    7.80 
   4   4  -6  119.29    9.30 
   4   4  -6  111.19    8.90 
  -4  -4   6  109.09    6.60 
  -4  -4   6  126.89    8.60 
  -4  -4   6  110.89    8.00 
   3   4  -6  255.27   14.10 
   3   4  -6  267.17   11.40 
   3   4  -6  260.27   12.90 
  -3  -4   6  252.97   13.50 
  -3  -4   6  259.67   13.30 
  -3  -4   6  286.27   13.20 
  -3  -4   6  242.88   10.70 
   2   4  -6    2.50    2.20 
   2   4  -6    1.30    1.60 
   2   4  -6    3.10    1.70 
   2   4  -6   -1.00    2.00 
  -2  -4   6    1.30    1.50 
  -2  -4   6    2.80    1.80 
  -2  -4   6   -2.50    1.60 
   1   4  -6  324.57   14.50 
   1   4  -6  333.27   12.60 
   1   4  -6  311.77   15.40 
  -1  -4   6  312.27   15.00 
  -1  -4   6  312.07   14.30 
  -1  -4   6  321.67   12.30 
  -1  -4   6  308.37   15.30 
   0   4  -6   -0.90    0.90 
   0   4  -6    1.30    1.70 
   0   4  -6   -1.80    1.10 
   0  -4   6    2.80    1.90 
   0  -4   6    0.10    0.90 
   0  -4   6    1.80    2.00 
   0  -4   6   -0.50    1.20 
  -1   4  -6  199.48   11.00 
  -1   4  -6  205.08   10.60 
  -1   4  -6  202.18    9.40 
  -1   4  -6  208.38   10.60 
   1  -4   6  194.08   10.80 
   1  -4   6  196.68   10.30 
   1  -4   6  197.08   11.30 
   1  -4   6  196.78    9.60 
  -2   4  -6   41.30    4.00 
  -2   4  -6   31.90    4.20 
  -2   4  -6   35.20    4.10 
   2  -4   6   33.60    3.80 
   2  -4   6   40.30    4.90 
   2  -4   6   44.40    4.80 
  -3   4  -6   88.29    7.40 
  -3   4  -6  100.59    7.10 
  -3   4  -6   94.09    6.70 
  -3   4  -6   96.19    6.50 
  -3   4  -6   97.49    6.10 
   3  -4   6  101.19    7.50 
   3  -4   6  106.29    7.90 
   3  -4   6  106.29    7.50 
   3  -4   6  103.19    6.80 
  -4   4  -6  177.78   10.00 
  -4   4  -6  180.18   10.90 
   4  -4   6  184.78   10.80 
   4  -4   6  176.58    9.50 
   4  -4   6  169.28   10.90 
  -5   4  -6    1.80    1.70 
  -5   4  -6    1.20    2.10 
   5  -4   6    2.00    2.00 
   5  -4   6    1.40    2.50 
  -6   4  -6    1.10    2.20 
   6  -4   6   -1.60    2.50 
   6  -4   6    2.10    1.90 
  -7   4  -6    0.60    2.30 
   7  -4   6    1.40    2.10 
  -8   4  -6   -2.80    2.70 
   8  -4   6   -0.30    2.70 
   9   3  -6   -9.60    4.20 
  -9  -3   6   -3.10    3.40 
   8   3  -6    0.50    3.50 
   7   3  -6    0.30    3.30 
   7   3  -6    3.40    3.50 
   7   3  -6    0.30    2.70 
   6   3  -6   12.40    3.90 
   6   3  -6   19.80    4.30 
   6   3  -6   12.80    3.70 
  -6  -3   6   15.20    3.20 
  -6  -3   6   22.60    3.70 
   5   3  -6   11.30    3.70 
   5   3  -6   16.00    4.10 
   5   3  -6   15.50    3.80 
  -5  -3   6   19.20    3.40 
  -5  -3   6   16.90    3.40 
   4   3  -6   12.80    3.10 
   4   3  -6   10.60    3.10 
   4   3  -6    6.70    2.30 
   4   3  -6    8.30    3.30 
  -4  -3   6    8.60    2.70 
  -4  -3   6   14.80    2.70 
   3   3  -6   -1.00    1.40 
   3   3  -6    0.20    1.20 
   3   3  -6   -0.70    1.60 
   3   3  -6    1.10    1.30 
  -3  -3   6   -0.10    1.30 
  -3  -3   6    2.00    1.50 
  -3  -3   6    0.00    1.60 
   2   3  -6   29.20    3.40 
   2   3  -6   32.80    4.20 
   2   3  -6   29.00    4.00 
  -2  -3   6   35.80    4.20 
  -2  -3   6   32.50    3.90 
  -2  -3   6   28.50    3.50 
   1   3  -6   38.90    4.30 
   1   3  -6   37.80    4.30 
   1   3  -6   46.40    4.30 
  -1  -3   6   36.40    4.20 
  -1  -3   6   44.80    4.60 
  -1  -3   6   46.30    3.20 
  -1  -3   6   38.50    3.80 
   0   3  -6   20.40    3.70 
   0   3  -6   22.80    2.40 
   0   3  -6   23.10    3.10 
   0   3  -6   17.80    3.10 
   0  -3   6   20.00    3.20 
   0  -3   6   24.20    3.00 
   0  -3   6   21.30    3.60 
   0  -3   6   20.30    2.20 
  -1   3  -6   23.80    3.10 
  -1   3  -6   18.40    3.50 
  -1   3  -6   17.40    3.10 
  -1   3  -6   22.50    2.50 
   1  -3   6   19.70    2.70 
   1  -3   6   15.60    2.60 
   1  -3   6   16.60    3.20 
   1  -3   6   17.90    3.40 
  -2   3  -6   99.69    6.30 
  -2   3  -6  129.19    6.80 
  -2   3  -6  102.39    6.40 
   2  -3   6   98.79    6.10 
   2  -3   6  105.89    6.60 
   2  -3   6  106.59    6.80 
  -3   3  -6    1.20    1.30 
  -3   3  -6    0.80    1.50 
  -3   3  -6    2.00    1.50 
   3  -3   6   -0.60    1.60 
   3  -3   6    3.20    1.70 
   3  -3   6    3.10    1.40 
   3  -3   6    1.80    1.50 
  -4   3  -6    1.40    1.70 
  -4   3  -6    3.90    1.70 
  -4   3  -6    6.70    2.70 
   4  -3   6    0.20    1.50 
   4  -3   6    2.30    1.50 
   4  -3   6    2.60    2.20 
   4  -3   6    3.10    1.90 
  -5   3  -6    2.60    2.20 
   5  -3   6    1.30    1.90 
  -6   3  -6   -0.50    2.20 
   6  -3   6   -0.30    1.70 
  -7   3  -6   -1.30    2.40 
  -8   3  -6   -1.10    2.40 
   9   2  -6    1.40    6.10 
  -9  -2   6    0.10    3.60 
   8   2  -6   11.80    4.20 
   7   2  -6    4.40    3.40 
   6   2  -6   89.19    8.70 
   5   2  -6    6.10    4.80 
   5   2  -6    1.40    2.20 
   5   2  -6    1.00    1.90 
  -5  -2   6    3.60    2.40 
   4   2  -6    0.90    1.70 
   4   2  -6    1.90    2.10 
   4   2  -6    3.50    1.40 
   4   2  -6   -1.40    1.50 
  -4  -2   6    2.30    1.50 
  -4  -2   6    1.40    1.50 
   3   2  -6   20.50    3.20 
   3   2  -6   18.70    2.40 
   3   2  -6   16.70    3.10 
   3   2  -6   22.90    3.50 
  -3  -2   6   19.40    3.10 
  -3  -2   6   16.70    2.70 
  -3  -2   6   16.40    2.40 
  -3  -2   6   15.60    2.40 
   2   2  -6   46.10    3.80 
   2   2  -6   52.99    3.60 
   2   2  -6   49.80    4.40 
  -2  -2   6   53.09    3.40 
  -2  -2   6   47.70    3.80 
  -2  -2   6   45.80    4.20 
  -2  -2   6   52.49    4.40 
   1   2  -6   -1.00    1.00 
   1   2  -6    0.20    1.00 
   1   2  -6    0.40    1.30 
   1   2  -6    0.40    1.30 
  -1  -2   6   -0.30    1.20 
  -1  -2   6    0.70    1.40 
  -1  -2   6    0.10    0.90 
   0   2  -6 1017.70   36.20 
   0   2  -6 1011.50   34.20 
   0   2  -6 1111.89   32.70 
   0   2  -6  982.40   33.60 
   0  -2   6 1050.09   32.60 
   0  -2   6 1005.50   34.30 
   0  -2   6  999.80   33.80 
   0  -2   6 1033.50   34.40 
  -1   2  -6   11.30    1.90 
  -1   2  -6   10.10    2.10 
  -1   2  -6    9.70    2.20 
  -1   2  -6    8.50    2.00 
   1  -2   6    8.40    2.30 
   1  -2   6   11.60    2.00 
   1  -2   6    9.70    2.20 
  -2   2  -6    0.30    0.90 
  -2   2  -6   -0.60    0.80 
  -2   2  -6    1.00    1.00 
   2  -2   6   -0.80    1.00 
   2  -2   6   -1.20    0.90 
   2  -2   6    0.30    1.10 
  -3   2  -6   37.60    3.80 
  -3   2  -6   36.90    3.10 
  -3   2  -6   35.40    4.10 
   3  -2   6   34.50    3.30 
   3  -2   6   37.00    3.30 
   3  -2   6   37.00    3.80 
   3  -2   6   29.70    4.00 
  -4   2  -6   -1.00    1.50 
  -4   2  -6    0.10    1.30 
  -5   2  -6   -0.40    1.70 
  -6   2  -6   17.70    3.80 
  -7   2  -6    3.00    3.00 
  -8   2  -6    5.10    3.90 
  -9   2  -6   -4.80    3.40 
   9   1  -6    2.20    5.00 
  -9  -1   6    6.10    4.10 
   7   1  -6    4.50    3.40 
   6   1  -6   10.30    4.20 
   5   1  -6    3.70    2.60 
  -5  -1   6    2.40    2.00 
   4   1  -6   29.80    3.80 
   4   1  -6   36.50    4.40 
  -4  -1   6   31.10    3.90 
  -4  -1   6   29.40    3.70 
   3   1  -6  311.27   12.10 
   3   1  -6  312.97   12.60 
   3   1  -6  325.47   13.40 
  -3  -1   6  332.17   12.90 
  -3  -1   6  316.67   12.10 
   2   1  -6   65.39    4.30 
   2   1  -6   64.69    4.40 
   2   1  -6   70.99    4.60 
   2   1  -6   64.69    4.00 
  -2  -1   6   63.19    3.90 
  -2  -1   6   64.29    4.40 
  -2  -1   6   60.29    4.10 
  -2  -1   6   64.79    4.00 
   1   1  -6   64.19    4.30 
   1   1  -6   63.19    3.90 
   1   1  -6   70.99    4.60 
   1   1  -6   77.69    3.90 
  -1  -1   6   73.29    3.70 
  -1  -1   6   64.49    3.90 
  -1  -1   6   63.99    4.30 
  -1  -1   6   72.59    4.70 
   0   1  -6    6.10    1.60 
   0   1  -6    8.10    1.80 
   0   1  -6    7.80    1.50 
   0   1  -6    6.40    1.60 
   0  -1   6    5.50    1.60 
   0  -1   6    5.00    2.50 
   0  -1   6    6.20    1.30 
   0  -1   6    6.50    1.30 
  -1   1  -6   39.60    2.80 
  -1   1  -6   39.90    2.70 
  -1   1  -6   36.20    2.80 
   1  -1   6   42.90    3.20 
  -2   1  -6    8.90    1.70 
   2  -1   6   10.20    1.50 
   2  -1   6    7.60    1.80 
   2  -1   6    7.40    1.80 
  -3   1  -6   47.50    4.00 
  -3   1  -6   54.79    4.60 
   3  -1   6   53.49    4.40 
  -4   1  -6    4.20    1.90 
  -4   1  -6    2.30    1.80 
  -5   1  -6   13.50    3.40 
  -5   1  -6   10.20    3.00 
  -6   1  -6   35.70    5.20 
  -7   1  -6    2.00    2.90 
  -8   1  -6    2.20    3.30 
  -9   1  -6   -0.70    3.90 
   9   0  -6   -1.20    4.40 
  -9   0   6   -0.90    2.70 
   8   0  -6    0.40    3.50 
  -8   0   6    1.50    2.80 
   7   0  -6    6.10    3.20 
   6   0  -6    2.50    2.80 
   5   0  -6   21.90    4.50 
  -5   0   6   13.70    3.40 
   4   0  -6    2.60    2.00 
  -4   0   6    0.70    1.80 
   3   0  -6    1.60    1.50 
   3   0  -6    1.60    1.30 
   3   0  -6    1.50    1.00 
   3   0  -6    2.50    1.60 
  -3   0   6    0.90    1.20 
  -3   0   6    1.10    1.00 
   2   0  -6  199.38    8.70 
   2   0  -6  191.38    7.90 
   2   0  -6  189.38    7.60 
   2   0  -6  186.48    8.70 
  -2   0   6  190.18    7.60 
  -2   0   6  183.88    7.70 
  -2   0   6  191.78    8.50 
  -2   0   6  189.78    8.20 
   1   0  -6  285.07   10.50 
   1   0  -6  299.37   10.60 
   1   0  -6  282.17   10.70 
  -1   0   6  299.77   11.40 
  -1   0   6  310.27   10.50 
  -1   0   6  270.37   10.30 
  -1   0   6  280.07   10.70 
   0   0  -6 1073.19   33.20 
   0   0  -6 1033.10   33.00 
   0   0  -6 1027.20   33.90 
   0   0  -6 1089.99   32.50 
   0   0   6 1138.29   32.50 
   0   0   6 1009.80   32.90 
   0   0   6 1021.10   33.20 
   0   0   6 1019.70   33.90 
  -1   0  -6  310.87   10.00 
  -1   0  -6  276.27   10.10 
  -1   0  -6  285.07   10.60 
  -1   0  -6  284.87   10.10 
   1   0   6  278.17   10.10 
   1   0   6  308.27   10.10 
   1   0   6  280.27   10.80 
  -2   0  -6  296.97   11.00 
  -3   0  -6   11.30    2.40 
  -3   0  -6   11.40    2.10 
   3   0   6    9.50    1.90 
  -4   0  -6  232.18   10.60 
  -4   0  -6  218.08   11.20 
  -5   0  -6   15.90    3.90 
  -5   0  -6   14.60    3.10 
  -6   0  -6   83.99    8.00 
  -6   0  -6   71.19    7.90 
  -7   0  -6   -0.30    2.10 
  -8   0  -6    1.70    3.10 
  -9   0  -6    5.70    3.20 
   9  -1  -6   -7.10    3.50 
  -9   1   6   -0.90    3.20 
   8  -1  -6    6.20    4.50 
  -8   1   6    2.50    3.20 
   7  -1  -6   10.40    4.50 
   6  -1  -6    2.00    3.10 
   5  -1  -6    0.70    2.80 
  -5   1   6    7.30    3.50 
   4  -1  -6  817.22   31.80 
  -4   1   6  866.41   33.70 
   3  -1  -6  236.98    9.10 
   3  -1  -6  236.68    9.20 
   3  -1  -6  214.68   10.40 
   3  -1  -6  238.28    9.50 
   3  -1  -6  236.08   11.40 
  -3   1   6  224.18    9.10 
  -3   1   6  246.08   11.20 
   2  -1  -6 1302.27   42.50 
   2  -1  -6 1334.77   43.00 
   2  -1  -6 1325.97   41.30 
   2  -1  -6 1320.57   41.50 
  -2   1   6 1304.97   41.30 
  -2   1   6 1302.27   42.00 
  -2   1   6 1273.37   41.20 
  -2   1   6 1329.47   42.70 
   1  -1  -6  177.88    8.20 
   1  -1  -6  167.68    7.40 
   1  -1  -6  163.38    6.90 
   1  -1  -6  172.58    7.30 
  -1   1   6  167.88    7.10 
  -1   1   6  171.58    7.20 
  -1   1   6  175.48    8.00 
  -1   1   6  163.08    7.00 
   0  -1  -6 4146.19  141.69 
   0  -1  -6 4754.22  141.99 
   0  -1  -6 4836.72  143.29 
   0  -1  -6 4872.51  142.29 
   0   1   6 4811.82  142.29 
   0   1   6 4698.73  142.09 
   0   1   6 4869.31  141.19 
  -1  -1  -6  217.28    6.80 
  -1  -1  -6  195.38    7.80 
  -1  -1  -6  187.78    8.60 
  -1  -1  -6  186.48    7.60 
   1   1   6  181.48    8.60 
   1   1   6  205.28    6.80 
  -2  -1  -6  336.57   12.50 
  -2  -1  -6  354.46   12.40 
  -2  -1  -6  350.16   12.40 
  -2  -1  -6  355.76   11.90 
   2   1   6  361.36   13.40 
   2   1   6  360.36   12.30 
   2   1   6  347.47   12.50 
   2   1   6  356.06   12.40 
  -3  -1  -6   36.80    3.30 
  -3  -1  -6   32.30    2.70 
  -4  -1  -6 1115.79   36.80 
  -4  -1  -6 1105.29   37.60 
  -5  -1  -6    3.60    1.70 
  -5  -1  -6   -3.10    1.70 
  -6  -1  -6   22.70    4.50 
  -6  -1  -6   21.80    4.40 
  -7  -1  -6   -1.40    2.40 
  -8  -1  -6    4.40    4.10 
   9  -2  -6   -2.20    4.30 
  -9   2   6   -0.20    3.00 
   8  -2  -6    2.10    4.10 
  -8   2   6   -1.00    2.30 
   6  -2  -6  255.37   16.60 
   5  -2  -6    0.80    2.80 
   4  -2  -6  895.31   31.50 
   4  -2  -6  871.41   29.90 
   4  -2  -6  869.21   29.20 
   4  -2  -6  907.21   33.90 
   4  -2  -6  872.41   29.60 
  -4   2   6  890.91   29.80 
  -4   2   6  882.31   32.90 
   3  -2  -6   -0.40    1.20 
   3  -2  -6    1.10    1.00 
   3  -2  -6    1.80    1.30 
   3  -2  -6    1.00    1.60 
   3  -2  -6   -1.00    1.50 
  -3   2   6   -0.10    1.10 
  -3   2   6    1.90    1.50 
   2  -2  -6  195.68    8.50 
   2  -2  -6  180.58    8.10 
   2  -2  -6  162.78   10.30 
   2  -2  -6  193.98    9.50 
  -2   2   6  189.68    8.20 
  -2   2   6  191.08    9.20 
  -2   2   6  192.58    8.40 
  -2   2   6  191.68    9.10 
   1  -2  -6  151.08    6.90 
   1  -2  -6  147.89    7.10 
   1  -2  -6  147.39    7.10 
   1  -2  -6  142.19    7.90 
   1  -2  -6  147.79    7.00 
  -1   2   6  146.99    7.00 
  -1   2   6  146.59    7.90 
  -1   2   6  148.69    6.90 
  -1   2   6  135.19    6.80 
  -1   2   6  152.88    7.10 
   0  -2  -6 1292.37   38.20 
   0  -2  -6 1213.78   39.10 
   0  -2  -6 1233.18   39.00 
   0  -2  -6 1194.58   40.30 
   0   2   6 1193.58   38.90 
   0   2   6 1181.88   39.10 
   0   2   6 1183.88   40.50 
   0   2   6 1175.38   37.60 
   0   2   6 1257.27   40.60 
  -1  -2  -6  358.46   14.20 
  -1  -2  -6  346.37   13.00 
  -1  -2  -6  347.37   13.30 
  -1  -2  -6  358.46   13.30 
   1   2   6  343.57   13.00 
   1   2   6  326.67   13.20 
   1   2   6  363.16   14.50 
  -2  -2  -6    4.40    1.50 
  -2  -2  -6    5.20    1.50 
  -2  -2  -6    2.10    1.30 
  -2  -2  -6    3.30    1.60 
   2   2   6    5.10    1.50 
   2   2   6    3.70    2.00 
   2   2   6    4.80    1.60 
  -3  -2  -6    1.10    1.20 
   3   2   6    0.70    1.50 
   3   2   6    1.50    1.30 
  -4  -2  -6   19.50    2.90 
  -5  -2  -6    6.00    2.30 
  -5  -2  -6    6.30    1.90 
   5   2   6    5.10    2.40 
  -6  -2  -6   33.60    5.30 
  -6  -2  -6   46.90    5.70 
  -7  -2  -6    0.30    2.50 
  -7  -2  -6   -0.20    2.00 
  -8  -2  -6   -0.70    3.00 
  -9  -2  -6    2.20    4.30 
   8  -3  -6    6.30    4.70 
  -8   3   6   11.40    4.70 
   7  -3  -6    2.00    4.00 
  -7   3   6    4.50    3.00 
   6  -3  -6  144.19   11.00 
   6  -3  -6  146.59   13.00 
   6  -3  -6  139.29    9.00 
  -6   3   6  145.99   11.80 
   5  -3  -6    8.20    3.50 
   5  -3  -6    6.40    2.40 
   5  -3  -6    0.90    2.70 
  -5   3   6    5.20    2.50 
   4  -3  -6   17.90    4.50 
   4  -3  -6   21.40    2.80 
   4  -3  -6   19.00    3.50 
   4  -3  -6   22.00    4.40 
  -4   3   6   18.10    3.70 
   3  -3  -6    6.70    2.00 
   3  -3  -6    8.00    1.90 
   3  -3  -6    7.10    2.40 
   3  -3  -6    9.40    2.90 
   3  -3  -6   11.20    2.70 
  -3   3   6    4.80    2.40 
  -3   3   6    6.70    1.70 
  -3   3   6    8.20    2.50 
  -3   3   6    9.00    2.10 
   2  -3  -6    0.80    1.70 
   2  -3  -6    2.40    1.70 
   2  -3  -6   -1.00    1.40 
   2  -3  -6    1.80    1.20 
  -2   3   6    0.80    1.20 
  -2   3   6    0.70    1.20 
  -2   3   6   -0.20    1.10 
  -2   3   6    2.20    1.50 
  -2   3   6    1.10    1.10 
   1  -3  -6    9.20    2.20 
   1  -3  -6    7.60    2.60 
   1  -3  -6    6.10    1.90 
   1  -3  -6    6.10    2.10 
   1  -3  -6    6.50    2.10 
  -1   3   6    7.40    2.00 
  -1   3   6   10.60    2.90 
  -1   3   6    4.10    1.70 
  -1   3   6    6.60    1.90 
   0  -3  -6   26.40    3.40 
   0  -3  -6   22.20    2.40 
   0  -3  -6   23.40    2.90 
   0  -3  -6   19.80    2.80 
   0   3   6   22.20    2.30 
   0   3   6   18.20    3.50 
   0   3   6   19.50    3.10 
  -1  -3  -6    8.90    2.70 
  -1  -3  -6    4.80    1.90 
  -1  -3  -6   12.30    2.30 
   1   3   6   11.90    2.20 
   1   3   6   11.00    3.10 
   1   3   6    9.40    2.30 
  -2  -3  -6   42.40    3.90 
  -2  -3  -6   39.90    4.30 
  -2  -3  -6   47.30    4.10 
  -2  -3  -6   35.70    3.50 
   2   3   6   36.10    4.60 
   2   3   6   45.60    3.70 
  -3  -3  -6   19.30    4.90 
  -3  -3  -6   10.20    4.20 
   3   3   6   17.20    2.40 
   3   3   6   14.10    2.80 
  -4  -3  -6    4.50    1.90 
  -4  -3  -6    4.50    2.20 
   4   3   6    1.40    2.50 
   4   3   6    6.40    2.40 
  -5  -3  -6    2.30    1.80 
  -5  -3  -6    4.50    1.70 
   5   3   6    2.30    2.70 
   5   3   6    2.60    2.40 
  -6  -3  -6   82.79    6.70 
  -6  -3  -6   71.69    5.80 
   6   3   6   82.19    7.00 
   7   3   6   -2.80    2.90 
  -8  -3  -6    7.40    4.00 
   8   3   6   12.50    6.00 
   9  -4  -6    2.80    5.10 
  -9   4   6    1.20    4.00 
   8  -4  -6   13.90    5.90 
   8  -4  -6   18.60    4.60 
  -8   4   6   22.20    6.40 
   7  -4  -6   18.80    4.30 
   7  -4  -6   19.20    5.90 
   7  -4  -6   15.30    5.20 
  -7   4   6   13.10    4.90 
   6  -4  -6    5.50    3.90 
   6  -4  -6    9.80    3.50 
   6  -4  -6   16.40    4.30 
  -6   4   6   17.10    4.80 
   5  -4  -6   10.50    3.20 
   5  -4  -6   10.70    4.00 
   5  -4  -6   10.00    3.00 
   5  -4  -6    7.40    3.80 
  -5   4   6    2.20    2.60 
   4  -4  -6    4.60    3.10 
   4  -4  -6    9.40    3.40 
   4  -4  -6    9.90    2.80 
   4  -4  -6    9.70    3.20 
  -4   4   6   10.50    3.30 
  -4   4   6   10.60    2.80 
  -4   4   6   10.40    3.00 
   3  -4  -6   68.29    5.50 
   3  -4  -6   59.69    4.80 
   3  -4  -6   58.49    5.70 
   3  -4  -6   65.49    6.50 
  -3   4   6   59.09    5.90 
  -3   4   6   65.79    6.00 
  -3   4   6   61.69    5.10 
  -3   4   6   66.59    5.10 
  -3   4   6   68.39    6.00 
   2  -4  -6   13.40    2.70 
   2  -4  -6    9.70    2.90 
   2  -4  -6   17.10    3.90 
   2  -4  -6   10.00    3.00 
   2  -4  -6    9.50    2.60 
  -2   4   6    6.20    2.40 
  -2   4   6   10.90    3.10 
  -2   4   6    9.30    2.20 
  -2   4   6   14.10    2.70 
  -2   4   6   12.00    2.70 
   1  -4  -6   41.10    4.70 
   1  -4  -6   32.70    6.60 
   1  -4  -6   36.90    4.20 
   1  -4  -6   34.50    3.90 
   1  -4  -6   37.50    3.80 
  -1   4   6   40.20    4.10 
  -1   4   6   34.80    4.80 
  -1   4   6   38.30    3.90 
  -1   4   6   38.20    4.20 
  -1   4   6   33.60    3.40 
   0  -4  -6   22.80    3.50 
   0  -4  -6   25.10    4.60 
   0  -4  -6   26.90    3.60 
   0  -4  -6   32.70    3.00 
   0   4   6   30.00    3.00 
   0   4   6   31.00    2.70 
   0   4   6   31.20    3.80 
   0   4   6   36.10    4.70 
   0   4   6   24.50    3.80 
  -1  -4  -6   -0.80    1.30 
  -1  -4  -6   -0.30    1.30 
  -1  -4  -6    1.90    1.70 
  -1  -4  -6   -1.50    1.70 
   1   4   6    0.90    1.30 
   1   4   6    0.90    2.00 
   1   4   6    5.20    2.20 
  -2  -4  -6    9.10    2.60 
  -2  -4  -6    9.40    2.50 
  -2  -4  -6   10.00    3.30 
  -2  -4  -6    7.90    2.60 
   2   4   6    7.70    3.30 
   2   4   6    9.80    2.40 
   2   4   6    6.00    2.40 
  -3  -4  -6    1.30    1.80 
  -3  -4  -6    0.00    1.80 
  -3  -4  -6    3.90    2.00 
  -3  -4  -6    7.60    2.50 
   3   4   6    4.90    1.90 
   3   4   6    3.00    2.80 
   3   4   6    1.50    1.90 
  -4  -4  -6    5.10    2.20 
  -4  -4  -6    8.00    2.60 
   4   4   6   10.00    4.30 
   4   4   6    2.00    2.80 
  -5  -4  -6   22.40    3.80 
  -5  -4  -6   28.70    4.10 
   5   4   6   32.50    6.00 
   5   4   6   30.50    5.30 
   6   4   6    9.00    3.90 
   6   4   6    5.30    3.80 
  -7  -4  -6    0.50    3.10 
   7   4   6    0.00    3.60 
   7   4   6    7.10    4.70 
   8  -5  -6   -0.80    3.20 
   8  -5  -6   -1.30    4.30 
  -8   5   6    4.30    3.90 
   7  -5  -6    3.20    4.30 
   7  -5  -6   -1.10    4.30 
   7  -5  -6    1.10    2.90 
  -7   5   6   -0.70    2.40 
   6  -5  -6    1.80    2.50 
   6  -5  -6   -3.40    3.10 
   6  -5  -6   -0.90    2.20 
  -6   5   6    0.90    2.70 
   5  -5  -6   23.00    5.20 
   5  -5  -6   16.50    4.60 
   5  -5  -6   23.50    4.80 
   5  -5  -6   10.20    3.50 
  -5   5   6   20.90    4.90 
   4  -5  -6    3.40    2.40 
   4  -5  -6    0.90    2.70 
   4  -5  -6   -5.40    2.30 
  -4   5   6    1.00    2.00 
  -4   5   6    6.20    3.00 
  -4   5   6    1.50    2.00 
   3  -5  -6   10.50    3.90 
   3  -5  -6    9.40    2.70 
   3  -5  -6    8.80    3.30 
   3  -5  -6    5.70    3.20 
  -3   5   6   11.60    3.60 
  -3   5   6    4.00    2.50 
  -3   5   6   10.20    3.20 
  -3   5   6    9.80    2.80 
   2  -5  -6  238.58   12.70 
   2  -5  -6  257.27   13.70 
   2  -5  -6  208.38   15.50 
   2  -5  -6  241.88   12.90 
   2  -5  -6  240.28   14.30 
  -2   5   6  248.38   12.70 
  -2   5   6  237.08   12.00 
  -2   5   6  226.98   12.20 
  -2   5   6  222.78   12.10 
  -2   5   6  253.47   14.00 
   1  -5  -6  305.87   16.60 
   1  -5  -6  324.37   14.10 
   1  -5  -6  309.57   14.60 
   1  -5  -6  314.07   15.40 
  -1   5   6  312.07   14.90 
  -1   5   6  311.37   14.80 
  -1   5   6  321.97   13.60 
  -1   5   6  333.27   16.90 
  -1   5   6  311.17   13.80 
   0  -5  -6  281.67   13.60 
   0  -5  -6  276.47   15.30 
   0  -5  -6  278.17   14.20 
   0  -5  -6  284.67   14.70 
   0   5   6  302.87   12.00 
   0   5   6  265.67   14.00 
   0   5   6  269.07   13.60 
   0   5   6  286.57   11.50 
   0   5   6  295.67   15.80 
  -1  -5  -6  111.59    8.30 
  -1  -5  -6  112.09    9.10 
  -1  -5  -6  123.59    8.50 
  -1  -5  -6  109.99    7.80 
   1   5   6  123.29    8.10 
   1   5   6  115.69    9.50 
   1   5   6  113.29    8.40 
  -2  -5  -6  230.98   13.80 
  -2  -5  -6  256.77   13.00 
  -2  -5  -6  256.47   13.70 
  -2  -5  -6  271.07   13.70 
   2   5   6  244.78   15.00 
   2   5   6  248.98   13.60 
   2   5   6  245.48   12.80 
  -3  -5  -6   57.09    6.10 
  -3  -5  -6   48.00    5.50 
  -3  -5  -6   55.89    6.00 
   3   5   6   60.09    7.60 
   3   5   6   56.29    6.50 
  -4  -5  -6    6.70    3.00 
  -4  -5  -6    0.70    2.50 
  -4  -5  -6    2.10    2.70 
   4   5   6   15.20    4.10 
   4   5   6    7.80    3.80 
  -5  -5  -6    5.40    2.60 
  -5  -5  -6    5.10    2.50 
   5   5   6    4.50    3.00 
   5   5   6   -2.40    3.40 
  -6  -5  -6    1.20    2.40 
  -6  -5  -6    1.00    2.90 
   6   5   6   -0.80    3.10 
   6   5   6   -3.10    3.20 
   7   5   6    5.70    4.80 
   7   5   6    9.00    4.60 
   8   5   6   14.50    5.20 
  -8   6   6    0.60    3.10 
   7  -6  -6    3.40    5.70 
  -7   6   6    2.50    3.70 
   6  -6  -6    2.10    4.90 
   6  -6  -6    3.30    3.50 
   6  -6  -6    4.00    3.90 
   6  -6  -6    1.00    3.40 
  -6   6   6    4.60    3.20 
   5  -6  -6    2.50    4.50 
   5  -6  -6   -3.10    2.70 
   5  -6  -6    1.20    3.00 
  -5   6   6   -1.50    1.60 
  -5   6   6   -1.60    2.00 
   4  -6  -6   14.60    4.60 
   4  -6  -6   15.80    4.90 
   4  -6  -6   11.10    4.40 
   4  -6  -6   12.50    3.60 
  -4   6   6   15.90    4.30 
  -4   6   6   16.00    3.60 
  -4   6   6   18.80    4.70 
   3  -6  -6   13.40    3.70 
   3  -6  -6   15.10    4.40 
   3  -6  -6   13.10    3.90 
   3  -6  -6   13.20    4.80 
  -3   6   6   15.40    3.70 
  -3   6   6   14.50    3.80 
  -3   6   6   21.20    5.30 
   2  -6  -6   10.90    3.30 
   2  -6  -6   14.10    4.50 
   2  -6  -6   15.60    3.40 
  -2   6   6   15.20    3.50 
  -2   6   6   17.60    4.40 
  -2   6   6   16.10    3.80 
   1  -6  -6   16.10    3.70 
   1  -6  -6   17.90    4.70 
   1  -6  -6   17.30    4.40 
   1  -6  -6   24.80    4.70 
  -1   6   6   28.50    4.30 
  -1   6   6   22.40    3.80 
  -1   6   6   27.10    4.30 
  -1   6   6   21.60    3.60 
  -1   6   6   18.70    4.70 
   0  -6  -6    7.00    2.70 
   0  -6  -6    8.50    3.40 
   0  -6  -6    4.40    3.10 
   0  -6  -6    7.00    3.30 
   0   6   6    7.00    2.60 
   0   6   6    5.70    3.10 
   0   6   6    7.00    2.40 
   0   6   6    2.10    1.50 
   0   6   6    5.90    3.60 
  -1  -6  -6   12.80    3.80 
  -1  -6  -6    4.40    3.50 
  -1  -6  -6   13.80    3.90 
  -1  -6  -6   14.20    3.80 
   1   6   6   17.80    4.70 
   1   6   6   16.00    5.00 
  -2  -6  -6   -0.40    2.30 
  -2  -6  -6    2.50    2.40 
  -2  -6  -6    4.50    2.50 
   2   6   6    2.80    3.30 
   2   6   6    5.00    3.60 
  -3  -6  -6    6.70    3.20 
  -3  -6  -6    9.10    3.70 
  -3  -6  -6    1.50    2.90 
   3   6   6    1.10    3.60 
   3   6   6   14.10    4.40 
  -4  -6  -6  100.59    9.20 
  -4  -6  -6   98.19    8.60 
  -4  -6  -6   98.99    9.00 
   4   6   6   99.79   11.00 
  -5  -6  -6   28.40    5.90 
  -5  -6  -6   27.90    5.20 
   5   6   6   26.00    6.40 
   5   6   6   17.20    5.50 
  -6  -6  -6   20.90    5.50 
  -6  -6  -6   28.40    5.90 
   6   6   6   21.30    6.70 
   6   6   6   18.10    6.50 
  -7  -6  -6    4.60    4.40 
  -7  -6  -6    6.80    3.60 
   7   6   6    0.00    4.50 
   7   6   6   -1.10    5.60 
   8   6   6   -3.30    4.80 
   7  -7  -6    1.60    3.10 
  -7   7   6   -4.20    2.40 
   6  -7  -6   -1.40    3.70 
   6  -7  -6   -0.90    4.70 
  -6   7   6    4.60    3.20 
   5  -7  -6    7.60    3.60 
   5  -7  -6    2.60    3.20 
  -5   7   6    0.70    2.60 
  -5   7   6    2.30    2.90 
  -5   7   6   -3.00    2.30 
   4  -7  -6    7.50    4.60 
  -4   7   6    9.90    3.70 
  -4   7   6   13.00    4.70 
  -4   7   6    8.60    3.20 
   3  -7  -6   -1.50    2.40 
   3  -7  -6    5.00    3.10 
   3  -7  -6    5.70    4.40 
  -3   7   6   -4.40    2.50 
  -3   7   6    2.30    2.10 
  -3   7   6    0.40    2.50 
   2  -7  -6    4.10    3.50 
   2  -7  -6    2.80    2.30 
  -2   7   6    1.50    2.20 
  -2   7   6    3.00    3.40 
  -2   7   6   -2.40    2.20 
   1  -7  -6    9.60    3.50 
   1  -7  -6   11.00    3.50 
   1  -7  -6    3.70    2.80 
  -1   7   6    9.60    4.50 
  -1   7   6    8.40    3.00 
  -1   7   6    2.10    3.10 
   0  -7  -6   39.10    7.30 
   0  -7  -6   39.90    6.30 
   0  -7  -6   30.80    6.40 
   0  -7  -6   33.90    6.10 
   0   7   6   42.40    5.60 
   0   7   6   29.20    6.70 
   0   7   6   34.20    6.10 
   0   7   6   24.20    4.40 
   0   7   6   25.30    3.70 
  -1  -7  -6    5.10    3.20 
  -1  -7  -6    4.90    3.60 
  -1  -7  -6   10.60    3.70 
   1   7   6    8.80    3.70 
   1   7   6    4.80    4.00 
   1   7   6    7.20    2.90 
  -2  -7  -6   13.30    4.40 
  -2  -7  -6   10.70    5.50 
   2   7   6   14.50    5.10 
   2   7   6   12.10    5.10 
  -3  -7  -6    4.50    3.60 
  -3  -7  -6    2.50    3.10 
  -3  -7  -6    0.30    3.30 
   3   7   6    6.70    4.70 
   3   7   6   -0.30    3.90 
  -4  -7  -6   12.30    4.80 
  -4  -7  -6   19.40    5.30 
  -4  -7  -6   16.50    4.70 
   4   7   6   12.40    5.60 
  -5  -7  -6   -4.20    2.80 
  -5  -7  -6   -1.40    2.70 
   5   7   6   -4.60    3.40 
  -6  -7  -6   12.60    4.30 
  -6  -7  -6    2.10    3.40 
   6   7   6   -2.50    3.90 
  -7  -7  -6   -1.60    3.00 
   7   7   6   -3.00    5.70 
   7  -8  -6    2.80    3.80 
  -7   8   6   -3.00    2.70 
   6  -8  -6    1.00    3.30 
  -6   8   6    1.80    2.60 
   5  -8  -6    0.80    3.50 
   5  -8  -6    9.60    6.40 
   5  -8  -6    1.40    4.00 
  -5   8   6    2.50    2.90 
  -5   8   6   -6.60    3.80 
  -5   8   6    8.10    3.20 
   4  -8  -6    2.20    3.60 
   4  -8  -6    5.80    5.40 
   4  -8  -6   -1.30    3.40 
  -4   8   6    2.40    3.40 
  -4   8   6   -0.70    2.60 
  -4   8   6    4.90    3.20 
   3  -8  -6   -8.10    4.20 
   3  -8  -6    3.00    3.20 
   3  -8  -6    0.90    3.50 
  -3   8   6    2.20    3.10 
  -3   8   6    3.10    2.50 
   2  -8  -6   31.10    7.00 
   2  -8  -6   27.70    6.50 
   2  -8  -6   35.50    6.60 
  -2   8   6   30.50    7.40 
  -2   8   6   25.20    4.80 
  -2   8   6   37.00    6.20 
   1  -8  -6   -0.60    2.90 
   1  -8  -6    7.30    4.30 
   1  -8  -6   -1.40    2.60 
  -1   8   6   -1.60    2.00 
  -1   8   6    0.50    2.90 
  -1   8   6    3.90    3.00 
  -1   8   6    6.50    3.20 
   0  -8  -6   -2.30    2.50 
   0  -8  -6    0.80    3.30 
   0  -8  -6    4.20    2.70 
   0   8   6    4.70    3.30 
   0   8   6   -0.50    2.10 
   0   8   6    1.30    3.80 
   0   8   6    3.40    2.90 
  -1  -8  -6    2.20    3.20 
  -1  -8  -6    1.90    3.20 
  -1  -8  -6    8.90    3.40 
   1   8   6    2.60    3.80 
   1   8   6   -0.60    3.50 
  -2  -8  -6    0.50    2.80 
  -2  -8  -6    6.70    3.90 
  -2  -8  -6    2.00    3.10 
   2   8   6    0.70    3.60 
   2   8   6    4.10    4.30 
  -3  -8  -6   -1.60    3.60 
  -3  -8  -6   -3.40    2.80 
  -3  -8  -6    3.00    3.40 
   3   8   6    5.30    4.50 
   3   8   6   -4.00    4.50 
  -4  -8  -6   -2.80    3.50 
  -4  -8  -6   -1.60    2.70 
   4   8   6   -5.10    3.80 
   4   8   6   12.60    6.60 
  -5  -8  -6   -2.40    2.90 
  -5  -8  -6   -2.10    4.40 
   5   8   6   -3.60    6.10 
   5   8   6   11.20    6.00 
  -6  -8  -6   -0.40    4.30 
   6  -9  -6   -2.10    4.70 
  -6   9   6    4.30    3.80 
   5  -9  -6   -1.20    3.10 
  -5   9   6    0.60    3.00 
   4  -9  -6   -1.50    3.80 
   4  -9  -6   14.50    7.20 
   4  -9  -6    5.60    4.70 
  -4   9   6    2.30    5.00 
  -4   9   6    2.70    4.30 
  -4   9   6    3.30    3.00 
   3  -9  -6   -1.40    4.50 
   3  -9  -6  -10.10    4.60 
   3  -9  -6   -0.40    3.60 
  -3   9   6    4.20    3.10 
  -3   9   6    1.10    4.00 
  -3   9   6   -0.20    3.40 
   2  -9  -6   -0.40    2.90 
   2  -9  -6   -0.90    5.10 
   2  -9  -6    4.30    3.90 
  -2   9   6    2.10    3.40 
  -2   9   6   -0.70    2.40 
  -2   9   6   -3.80    2.90 
   1  -9  -6   -2.10    2.90 
   1  -9  -6    3.90    3.90 
  -1   9   6    4.50    3.80 
  -1   9   6   -4.80    3.20 
  -1   9   6   -0.10    2.50 
   0  -9  -6    4.60    4.20 
   0  -9  -6   20.80    7.70 
   0  -9  -6   13.20    6.70 
   0   9   6    6.30    3.10 
   0   9   6    4.20    4.70 
   0   9   6   19.70    4.90 
  -1  -9  -6    7.90    4.50 
  -1  -9  -6    5.30    4.00 
  -2  -9  -6   -4.10    3.80 
  -2  -9  -6    0.60    3.20 
  -2  -9  -6    2.50    3.90 
   2   9   6   -4.70    4.20 
   2   9   6    1.00    5.80 
  -3  -9  -6   -0.80    3.30 
  -3  -9  -6    6.40    4.70 
  -3  -9  -6    5.70    4.40 
   3   9   6    7.00    6.00 
  -4  -9  -6    3.70    4.00 
   4   9   6    7.00    5.80 
  -5  -9  -6   -6.60    4.20 
   5   9   6   -5.90    5.70 
   5 -10  -6   -5.30    4.10 
  -5  10   6   -5.80    3.20 
   4 -10  -6    2.50    5.50 
  -4  10   6   -0.90    3.60 
   3 -10  -6    5.90    4.30 
   3 -10  -6    4.90    5.10 
  -3  10   6    0.50    2.90 
   2 -10  -6    1.30    3.90 
   2 -10  -6    1.80    4.10 
  -2  10   6    0.70    3.00 
  -2  10   6   -8.40    4.20 
   1 -10  -6    5.90    4.50 
   1 -10  -6   10.00    5.30 
  -1  10   6    9.80    5.90 
  -1  10   6    6.70    3.30 
   0 -10  -6    0.60    3.70 
   0 -10  -6   -6.00    3.90 
   0  10   6    1.30    2.90 
   0  10   6    3.60    4.60 
  -1 -10  -6    3.00    4.10 
  -1 -10  -6    6.20    4.60 
  -1 -10  -6    1.00    3.80 
   1  10   6    4.00    4.80 
  -2 -10  -6    3.10    4.20 
  -2 -10  -6   -7.30    4.10 
   2  10   6   -0.60    6.20 
  -3 -10  -6   25.70    7.50 
   3  10   6    5.00    6.50 
  -4 -10  -6    0.70    4.50 
   4  10   6    6.70    6.30 
   3 -11  -6    7.70    4.80 
  -3  11   6   -4.10    3.10 
   2 -11  -6    0.70    5.70 
   2 -11  -6    6.50    5.70 
  -2  11   6    1.90    3.90 
   1 -11  -6    4.80    5.40 
  -1  11   6    3.10    6.80 
  -1  11   6    1.00    3.30 
   0 -11  -6    3.50    5.10 
   0 -11  -6   -0.50    4.40 
   0  11   6    9.80    6.20 
   0  11   6    0.60    3.40 
  -1 -11  -6    0.00    4.40 
   1  11   6   -4.20    6.30 
  -2 -11  -6   -9.40    4.60 
   2  11   6   -3.00    5.60 
   3  11  -7  -11.10    5.40 
   3  11  -7    7.00    7.50 
  -3 -11   7    0.30    5.30 
   2  11  -7    0.70    4.50 
   2  11  -7   -0.40    6.50 
  -2 -11   7    1.40    5.00 
   1  11  -7   -4.00    5.70 
   1  11  -7    3.20    4.70 
  -1 -11   7    4.70    6.50 
   0  11  -7    1.20    5.60 
   0  11  -7   10.40    6.70 
   0 -11   7    0.10    6.80 
   0 -11   7    1.70    5.80 
  -1  11  -7    2.50    5.20 
  -1  11  -7    1.90    6.30 
   1 -11   7    1.90    5.30 
   1 -11   7   -6.90    4.90 
  -2  11  -7    9.60    5.00 
   2 -11   7   -2.40    7.60 
   2 -11   7    5.70    6.50 
  -3  11  -7   -0.30    4.00 
   3 -11   7    2.30    5.70 
   4  10  -7   -6.20    5.40 
  -4 -10   7    3.30    4.70 
   3  10  -7    3.70    6.30 
   3  10  -7   -4.70    3.80 
  -3 -10   7    2.60    4.50 
   2  10  -7   -2.10    3.60 
   2  10  -7   -1.20    3.30 
  -2 -10   7    6.10    5.40 
  -2 -10   7    1.10    4.90 
   1  10  -7   -1.40    3.90 
   1  10  -7    1.10    4.50 
  -1 -10   7    3.40    4.20 
   0  10  -7    6.00    6.90 
   0  10  -7    6.60    5.30 
   0 -10   7    4.90    4.60 
   0 -10   7    6.30    5.50 
  -1  10  -7    1.40    5.30 
  -1  10  -7   -5.80    4.00 
   1 -10   7    1.20    4.30 
   1 -10   7    3.80    4.70 
  -2  10  -7    0.80    4.00 
  -2  10  -7   -0.10    3.70 
   2 -10   7    2.90    4.30 
  -3  10  -7    1.30    3.70 
   3 -10   7   -0.60    4.30 
   3 -10   7    3.50    6.00 
  -4  10  -7   -1.70    3.60 
   4 -10   7   -0.10    4.70 
  -5  10  -7    7.90    4.00 
   5 -10   7   10.30    6.90 
   5   9  -7    0.80    6.40 
  -5  -9   7   -7.60    3.90 
   4   9  -7   14.80    8.00 
   4   9  -7   12.20   10.00 
  -4  -9   7   10.00    5.20 
   3   9  -7    4.80    6.30 
   3   9  -7    5.00    3.30 
  -3  -9   7    9.20    5.10 
  -3  -9   7   -1.60    2.90 
   2   9  -7   10.30    4.20 
   2   9  -7   11.20    6.20 
  -2  -9   7   11.50    5.10 
   1   9  -7   -2.10    3.80 
   1   9  -7   -3.60    3.60 
  -1  -9   7    2.30    3.10 
  -1  -9   7    3.10    4.20 
   0   9  -7    0.90    3.70 
   0   9  -7    0.60    3.00 
   0  -9   7    2.60    3.70 
   0  -9   7   -5.90    2.70 
  -1   9  -7    6.80    3.90 
  -1   9  -7    5.90    4.60 
  -1   9  -7    4.70    4.60 
   1  -9   7   19.40    5.10 
   1  -9   7   17.40    6.60 
  -2   9  -7   44.60    8.40 
  -2   9  -7   50.39   10.10 
  -2   9  -7   33.80    8.40 
   2  -9   7   39.10    8.00 
   2  -9   7   56.09    8.80 
  -3   9  -7    0.50    3.00 
  -3   9  -7   -2.20    3.90 
   3  -9   7   -5.10    3.40 
   3  -9   7   -2.30    3.80 
   3  -9   7    3.00    4.30 
  -4   9  -7    9.00    4.20 
  -4   9  -7   15.30    5.20 
   4  -9   7   15.30    7.00 
   4  -9   7    2.00    5.00 
  -5   9  -7   -0.90    2.90 
   5  -9   7   -2.20    4.00 
  -6   9  -7    0.40    3.10 
   6  -9   7   -6.00    4.70 
   6   8  -7    2.30    5.50 
   5   8  -7   26.60    9.60 
   5   8  -7   22.50    8.00 
  -5  -8   7   35.30    6.80 
   4   8  -7   33.60    6.90 
   4   8  -7   15.80    7.60 
   4   8  -7   27.70    7.20 
  -4  -8   7   14.90    6.10 
  -4  -8   7   24.10    6.10 
   3   8  -7   10.30    6.00 
   3   8  -7   27.20    7.50 
   3   8  -7   18.40    5.80 
  -3  -8   7   15.40    5.50 
  -3  -8   7   20.70    3.70 
  -3  -8   7   20.50    5.30 
   2   8  -7  157.18   15.40 
   2   8  -7  130.29   13.20 
  -2  -8   7  142.09   13.00 
  -2  -8   7  140.49   13.30 
  -2  -8   7  125.59    8.80 
   1   8  -7  197.48   15.00 
   1   8  -7  193.08   12.10 
   1   8  -7  196.98   15.60 
  -1  -8   7  206.68   16.40 
  -1  -8   7  184.08   12.00 
  -1  -8   7  193.48   15.00 
   0   8  -7   10.20    5.00 
   0   8  -7    8.70    4.40 
   0  -8   7   22.30    7.50 
   0  -8   7    4.10    5.40 
   0  -8   7   13.00    4.60 
  -1   8  -7   71.19    9.80 
  -1   8  -7   63.59    7.40 
  -1   8  -7   75.99    9.00 
   1  -8   7   67.19    9.50 
   1  -8   7   81.89    9.70 
  -2   8  -7  138.39   12.40 
  -2   8  -7  132.59   12.60 
  -2   8  -7  143.09   11.10 
   2  -8   7  130.99   13.40 
   2  -8   7  117.49   12.60 
   2  -8   7  135.09   11.70 
  -3   8  -7   17.00    5.30 
  -3   8  -7   14.50    5.40 
  -3   8  -7   23.00    5.50 
   3  -8   7   14.80    5.60 
   3  -8   7   21.30    5.20 
   3  -8   7   25.80    6.40 
  -4   8  -7   18.40    7.60 
  -4   8  -7   29.60    7.00 
  -4   8  -7   25.30    5.60 
   4  -8   7    9.70    5.80 
   4  -8   7   26.60    5.80 
   4  -8   7   25.00    6.80 
  -5   8  -7    5.40    3.50 
  -5   8  -7    5.30    3.00 
   5  -8   7   -0.40    3.40 
   5  -8   7    2.60    4.60 
   5  -8   7    5.60    4.50 
  -6   8  -7   -1.10    2.40 
  -6   8  -7   -1.80    3.40 
  -7   8  -7   -4.00    2.40 
   7  -8   7   -6.30    4.40 
   7   7  -7    3.60    5.30 
  -7  -7   7    3.70    4.00 
   6   7  -7   -2.20    3.80 
   6   7  -7   -6.90    5.80 
  -6  -7   7   -4.10    2.80 
   5   7  -7   -1.40    3.50 
   5   7  -7   -2.80    4.60 
   5   7  -7    1.20    3.30 
  -5  -7   7   -0.40    3.10 
  -5  -7   7    0.00    3.10 
   4   7  -7    3.70    4.70 
   4   7  -7    7.10    3.40 
   4   7  -7    3.30    4.40 
  -4  -7   7    8.00    2.70 
  -4  -7   7    9.30    4.10 
  -4  -7   7    9.10    3.90 
   3   7  -7   14.60    5.40 
   3   7  -7    8.20    4.80 
  -3  -7   7    6.50    2.50 
  -3  -7   7    4.80    3.20 
  -3  -7   7   10.20    4.20 
   2   7  -7   54.49    8.50 
   2   7  -7   48.50    8.10 
  -2  -7   7   30.60    4.40 
  -2  -7   7   29.20    5.60 
  -2  -7   7   34.40    6.80 
   1   7  -7   87.59    9.70 
   1   7  -7   93.09    8.60 
   1   7  -7   89.09    8.60 
  -1  -7   7   75.59    6.50 
  -1  -7   7   98.79   10.20 
  -1  -7   7   94.59    9.40 
   0   7  -7   96.99   10.90 
   0  -7   7   77.69    7.30 
   0  -7   7   72.09    9.00 
   0  -7   7  109.29   15.40 
   0  -7   7  110.79   11.70 
  -1   7  -7   11.30    4.50 
  -1   7  -7    8.30    3.70 
   1  -7   7   11.40    4.30 
   1  -7   7    9.10    3.80 
   1  -7   7   18.50    5.20 
  -2   7  -7   37.00    7.50 
  -2   7  -7   54.69    6.60 
  -2   7  -7   34.00    6.40 
   2  -7   7   42.40    8.20 
   2  -7   7   34.80    6.70 
  -3   7  -7   61.09    6.90 
  -3   7  -7   72.69    8.20 
  -3   7  -7   60.79    7.80 
   3  -7   7   58.19    7.50 
   3  -7   7   66.29    8.60 
   3  -7   7   59.79    8.90 
  -4   7  -7   32.10    5.80 
  -4   7  -7   34.80    6.20 
   4  -7   7   15.00    5.60 
   4  -7   7   29.20    6.40 
   4  -7   7   29.50    6.00 
  -5   7  -7    1.70    2.80 
  -5   7  -7   -1.10    2.40 
   5  -7   7   -0.90    3.00 
   5  -7   7    4.10    2.90 
   5  -7   7    1.30    3.50 
  -6   7  -7    7.10    3.30 
  -6   7  -7    4.60    3.30 
   6  -7   7    0.10    3.60 
   6  -7   7    9.70    3.50 
   6  -7   7   -3.60    5.00 
  -7   7  -7   -2.60    2.70 
   7  -7   7    4.80    5.80 
   8   6  -7   -1.10    5.30 
   8   6  -7   -9.70    4.80 
  -8  -6   7   11.10    4.90 
   7   6  -7    3.00    5.20 
   7   6  -7    3.40    4.20 
   7   6  -7    5.20    4.60 
  -7  -6   7    2.00    2.80 
   6   6  -7    4.80    4.30 
   6   6  -7    1.40    4.10 
  -6  -6   7   -1.50    2.70 
  -6  -6   7   -3.80    2.50 
   5   6  -7    3.60    4.00 
   5   6  -7    4.30    3.20 
  -5  -6   7   -3.40    2.70 
  -5  -6   7    1.40    2.90 
   4   6  -7   26.10    6.60 
   4   6  -7   30.70    4.80 
   4   6  -7   33.50    6.40 
  -4  -6   7   31.90    5.60 
  -4  -6   7   33.40    5.80 
  -4  -6   7   24.80    3.80 
   3   6  -7    5.70    3.10 
   3   6  -7   21.60    5.60 
   3   6  -7   14.90    5.10 
  -3  -6   7   10.70    2.50 
  -3  -6   7   18.20    4.20 
  -3  -6   7   12.20    4.00 
   2   6  -7   94.89    9.50 
   2   6  -7  108.09    7.00 
   2   6  -7   73.69    7.70 
   2   6  -7   84.09    9.40 
  -2  -6   7   91.49    9.40 
  -2  -6   7   78.99    8.20 
  -2  -6   7   79.59    5.90 
   1   6  -7   14.90    4.00 
   1   6  -7    4.90    3.70 
   1   6  -7    7.90    3.40 
   1   6  -7    8.60    3.70 
  -1  -6   7    5.20    2.10 
  -1  -6   7    9.30    3.50 
  -1  -6   7    7.80    3.60 
  -1  -6   7    7.30    3.60 
   0   6  -7   46.10    6.60 
   0   6  -7   27.60    5.00 
   0   6  -7   40.00    5.70 
   0   6  -7   47.60    6.20 
   0  -6   7   42.00    6.50 
   0  -6   7   41.60    6.60 
   0  -6   7   34.40    5.10 
  -1   6  -7   15.40    4.00 
  -1   6  -7   16.60    4.80 
  -1   6  -7   17.00    4.30 
  -1   6  -7   14.20    3.10 
   1  -6   7   13.00    3.20 
   1  -6   7   16.50    4.60 
   1  -6   7   16.90    3.90 
   1  -6   7   12.00    4.80 
  -2   6  -7   99.29    7.40 
  -2   6  -7   87.69    8.70 
  -2   6  -7   82.09    7.90 
   2  -6   7   99.09    8.20 
   2  -6   7   89.39    8.90 
  -3   6  -7   37.10    5.30 
  -3   6  -7   37.60    5.70 
  -3   6  -7   40.70    6.20 
   3  -6   7   53.49    6.90 
   3  -6   7   48.80    7.70 
  -4   6  -7    8.40    3.20 
  -4   6  -7    5.60    3.10 
  -4   6  -7    9.20    3.50 
   4  -6   7    7.00    3.30 
   4  -6   7   11.40    4.10 
  -5   6  -7    8.00    3.90 
  -5   6  -7    5.00    2.90 
   5  -6   7   -2.20    3.20 
   5  -6   7   12.60    4.10 
   5  -6   7    6.50    3.50 
  -6   6  -7    2.00    2.80 
  -6   6  -7   -0.90    2.30 
   6  -6   7   -6.00    3.40 
   6  -6   7   11.50    4.00 
   6  -6   7    2.10    2.90 
  -7   6  -7    6.80    2.60 
  -7   6  -7    2.90    3.00 
   7  -6   7    9.60    4.80 
   7  -6   7   -4.30    3.60 
   8  -6   7   -3.60    5.60 
   8   5  -7   -1.60    5.10 
   8   5  -7   -3.20    5.30 
   8   5  -7    0.20    5.00 
   7   5  -7   -2.70    3.30 
   7   5  -7    6.20    4.40 
   7   5  -7   -1.50    2.90 
  -7  -5   7   -1.00    2.70 
   6   5  -7    3.50    3.30 
   6   5  -7    2.20    3.70 
   6   5  -7   11.70    5.00 
  -6  -5   7    8.70    2.80 
  -6  -5   7    8.00    3.10 
   5   5  -7    4.50    3.10 
   5   5  -7   12.80    4.70 
   5   5  -7    4.60    3.30 
  -5  -5   7    4.30    2.60 
   4   5  -7   16.20    3.70 
   4   5  -7    8.40    4.20 
  -4  -5   7   14.80    3.20 
  -4  -5   7   18.30    5.30 
   3   5  -7   13.10    4.40 
   3   5  -7   11.00    4.10 
   3   5  -7   10.10    2.90 
  -3  -5   7   12.30    3.50 
  -3  -5   7   13.10    2.70 
  -3  -5   7    8.30    3.50 
   2   5  -7   17.00    3.30 
   2   5  -7   17.80    4.50 
   2   5  -7   27.20    6.00 
   2   5  -7   25.30    6.20 
  -2  -5   7   18.30    3.90 
  -2  -5   7   21.60    4.40 
  -2  -5   7   19.10    2.80 
  -2  -5   7   17.70    4.20 
   1   5  -7   -1.20    1.90 
   1   5  -7    4.10    2.70 
   1   5  -7    0.90    1.90 
   1   5  -7    0.90    2.30 
  -1  -5   7    5.50    2.40 
  -1  -5   7    0.00    2.20 
  -1  -5   7    1.00    2.20 
  -1  -5   7    2.80    1.50 
   0   5  -7    0.90    1.80 
   0   5  -7    0.60    1.80 
   0   5  -7   -1.20    1.70 
   0   5  -7    1.00    1.60 
   0  -5   7    1.60    1.80 
   0  -5   7   -1.10    1.30 
   0  -5   7    1.40    2.30 
   0  -5   7    0.10    1.80 
  -1   5  -7   14.70    3.30 
  -1   5  -7    9.00    2.50 
  -1   5  -7   11.10    3.60 
  -1   5  -7   10.40    3.20 
   1  -5   7   12.30    2.70 
   1  -5   7    7.70    3.50 
   1  -5   7   15.20    3.50 
   1  -5   7   11.10    3.40 
  -2   5  -7    2.40    1.80 
  -2   5  -7    4.70    2.20 
  -2   5  -7    0.60    1.90 
   2  -5   7   -0.10    1.30 
   2  -5   7   -0.30    2.20 
   2  -5   7   -1.80    1.70 
   2  -5   7    1.60    2.20 
  -3   5  -7    3.90    2.30 
  -3   5  -7   10.20    3.50 
  -3   5  -7    2.90    2.20 
   3  -5   7    4.30    3.00 
   3  -5   7   11.40    3.20 
  -4   5  -7    1.50    2.00 
  -4   5  -7    3.00    2.70 
   4  -5   7    0.30    3.00 
   4  -5   7    2.10    2.90 
   4  -5   7    5.80    3.30 
  -5   5  -7    3.90    2.70 
  -5   5  -7    4.10    2.40 
   5  -5   7    3.10    2.90 
   5  -5   7    1.00    3.30 
   5  -5   7    2.30    2.50 
  -6   5  -7   -1.70    2.00 
  -6   5  -7    1.20    2.10 
   6  -5   7   -0.30    3.30 
   6  -5   7    2.90    2.90 
  -7   5  -7    2.40    2.80 
   7  -5   7    3.10    4.40 
   7  -5   7   -1.00    2.80 
  -8   5  -7    7.00    3.40 
   8  -5   7   -3.90    3.20 
   8   4  -7    4.40    3.70 
   8   4  -7    1.50    4.70 
   7   4  -7    0.70    2.90 
   7   4  -7    1.20    3.40 
   7   4  -7    0.60    3.10 
   6   4  -7   12.90    4.30 
   6   4  -7   24.20    5.20 
   6   4  -7   16.40    4.40 
  -6  -4   7   18.40    4.00 
  -6  -4   7   14.80    3.00 
   5   4  -7   19.70    4.30 
   5   4  -7   11.40    4.10 
   5   4  -7   21.90    5.10 
  -5  -4   7   21.80    4.00 
   4   4  -7   44.60    6.60 
   4   4  -7   38.90    5.00 
   4   4  -7   50.99    6.30 
  -4  -4   7   47.80    5.70 
  -4  -4   7   46.30    4.50 
  -4  -4   7   41.40    5.20 
   3   4  -7    6.10    2.50 
   3   4  -7    4.80    2.70 
  -3  -4   7    3.70    2.30 
  -3  -4   7    5.30    2.30 
  -3  -4   7    5.30    2.20 
  -3  -4   7    1.00    1.70 
   2   4  -7   33.30    3.40 
   2   4  -7   27.10    4.60 
   2   4  -7   30.30    4.50 
   2   4  -7   27.20    3.60 
  -2  -4   7   24.60    4.20 
  -2  -4   7   31.00    3.30 
  -2  -4   7   24.60    4.50 
  -2  -4   7   28.10    4.20 
   1   4  -7    7.20    2.30 
   1   4  -7    1.50    1.80 
   1   4  -7    0.90    2.00 
   1   4  -7    3.90    2.40 
  -1  -4   7    3.90    1.40 
  -1  -4   7    3.40    2.30 
  -1  -4   7    4.00    2.00 
  -1  -4   7    2.60    1.70 
   0   4  -7    0.70    1.70 
   0   4  -7   -0.30    1.60 
   0   4  -7    1.50    1.70 
   0   4  -7    1.30    1.30 
   0  -4   7    1.00    1.00 
   0  -4   7   -0.70    1.80 
   0  -4   7   -0.90    1.30 
   0  -4   7    0.30    1.50 
  -1   4  -7    2.40    1.60 
  -1   4  -7    1.10    1.30 
  -1   4  -7    0.70    1.40 
  -1   4  -7   -0.60    1.40 
   1  -4   7    0.40    1.60 
   1  -4   7    2.20    1.70 
   1  -4   7    0.30    0.90 
   1  -4   7   -1.60    1.20 
  -2   4  -7  122.49    7.80 
  -2   4  -7  127.39    8.10 
  -2   4  -7  122.19    7.40 
   2  -4   7  121.19    7.70 
   2  -4   7  127.49    8.40 
   2  -4   7  125.39    8.80 
  -3   4  -7   10.50    2.40 
  -3   4  -7    3.70    2.20 
  -3   4  -7   15.60    3.10 
  -3   4  -7   13.10    3.10 
  -3   4  -7    4.90    2.70 
   3  -4   7   10.10    3.30 
   3  -4   7   12.00    3.00 
   3  -4   7   10.80    3.20 
   3  -4   7    9.40    2.60 
  -4   4  -7  114.09    7.80 
  -4   4  -7  116.79    8.50 
   4  -4   7  118.69    8.30 
   4  -4   7  120.69    7.60 
   4  -4   7  124.09    9.10 
  -5   4  -7   31.30    4.00 
  -5   4  -7   25.30    4.80 
   5  -4   7   21.30    3.40 
   5  -4   7   21.50    4.40 
   5  -4   7   24.30    4.90 
  -6   4  -7    7.20    3.10 
   6  -4   7    9.90    3.80 
   6  -4   7    8.10    3.30 
  -7   4  -7    2.00    2.70 
   7  -4   7    4.90    2.50 
  -8   4  -7   -1.30    2.80 
   8  -4   7   -1.30    2.50 
  -9   4  -7    0.70    2.50 
   9   3  -7    1.40    4.50 
  -9  -3   7    2.80    3.60 
   8   3  -7   -5.90    3.30 
   7   3  -7   -4.10    2.90 
   7   3  -7   -2.20    2.80 
   7   3  -7    0.30    3.10 
   6   3  -7   12.60    3.70 
   6   3  -7   17.60    4.50 
   6   3  -7   19.50    4.50 
  -6  -3   7   18.60    3.60 
  -6  -3   7   19.50    4.20 
   5   3  -7   28.60    5.00 
   5   3  -7   27.60    4.90 
  -5  -3   7   25.80    3.90 
  -5  -3   7   30.30    4.20 
   4   3  -7   37.00    5.30 
   4   3  -7   49.60    5.20 
   4   3  -7   44.00    5.30 
  -4  -3   7   46.50    4.70 
  -4  -3   7   49.30    4.30 
   3   3  -7    0.40    1.60 
   3   3  -7    0.70    1.80 
   3   3  -7    1.80    2.20 
   3   3  -7   -1.30    0.70 
  -3  -3   7   -1.30    1.50 
  -3  -3   7    0.90    1.20 
  -3  -3   7    0.00    1.60 
  -3  -3   7   -0.50    1.30 
   2   3  -7 1037.40   32.30 
   2   3  -7  959.60   34.80 
   2   3  -7  923.81   34.60 
   2   3  -7 1005.00   34.30 
  -2  -3   7  998.10   31.90 
  -2  -3   7  958.80   34.60 
  -2  -3   7  975.70   33.80 
  -2  -3   7  972.90   34.60 
   1   3  -7  518.35   20.30 
   1   3  -7  541.75   21.20 
   1   3  -7  570.74   18.70 
   1   3  -7  519.95   21.10 
  -1  -3   7  516.35   20.20 
  -1  -3   7  568.54   22.70 
  -1  -3   7  554.54   18.50 
  -1  -3   7  511.55   21.10 
   0   3  -7    5.10    2.00 
   0   3  -7    6.60    2.30 
   0   3  -7    4.50    1.90 
   0   3  -7    3.10    1.50 
   0  -3   7    4.70    2.20 
   0  -3   7    4.50    2.10 
   0  -3   7    1.90    1.30 
   0  -3   7    3.40    1.30 
  -1   3  -7  308.87   13.40 
  -1   3  -7  309.77   13.60 
  -1   3  -7  334.87   12.60 
  -1   3  -7  311.47   13.30 
   1  -3   7  304.57   14.00 
   1  -3   7  307.27   13.10 
   1  -3   7  315.67   12.80 
   1  -3   7  314.57   13.80 
  -2   3  -7 1388.36   45.50 
  -2   3  -7 1394.96   45.80 
  -2   3  -7 1390.16   45.50 
  -2   3  -7 1351.06   45.20 
   2  -3   7 1394.86   46.20 
   2  -3   7 1399.26   46.10 
   2  -3   7 1386.66   45.40 
  -3   3  -7    3.70    1.90 
  -3   3  -7    6.20    2.10 
   3  -3   7    4.20    2.10 
   3  -3   7    1.90    1.90 
   3  -3   7    5.30    2.10 
  -4   3  -7   17.30    2.90 
  -4   3  -7   16.90    3.50 
  -4   3  -7   16.50    3.60 
   4  -3   7   19.60    3.60 
   4  -3   7   17.40    3.50 
   4  -3   7   18.50    2.80 
   4  -3   7   19.30    3.40 
  -5   3  -7    2.70    2.20 
   5  -3   7    7.90    2.70 
  -6   3  -7    7.40    3.10 
   6  -3   7    4.20    2.10 
  -7   3  -7    3.10    3.00 
  -8   3  -7    6.50    3.80 
   9   2  -7    1.10    4.00 
  -9  -2   7    0.60    3.10 
   8   2  -7    2.70    4.10 
   7   2  -7    1.20    3.30 
   6   2  -7    6.20    3.30 
   5   2  -7   -1.10    2.00 
   5   2  -7    4.00    2.60 
   5   2  -7    1.10    2.10 
  -5  -2   7    1.10    1.50 
  -5  -2   7    2.20    1.90 
   4   2  -7    7.70    2.70 
   4   2  -7   10.50    3.00 
   4   2  -7    5.60    1.80 
   4   2  -7    6.70    2.30 
  -4  -2   7    6.30    2.00 
  -4  -2   7    8.20    2.40 
   3   2  -7   46.60    4.60 
   3   2  -7   49.30    3.90 
   3   2  -7   48.60    4.50 
   3   2  -7   50.39    4.40 
  -3  -2   7   44.20    3.90 
  -3  -2   7   47.00    3.70 
  -3  -2   7   49.10    4.50 
  -3  -2   7   51.49    4.10 
   2   2  -7   39.20    3.30 
   2   2  -7   36.00    3.90 
   2   2  -7   40.70    3.60 
  -2  -2   7   42.90    4.10 
  -2  -2   7   35.10    3.70 
  -2  -2   7   37.40    3.00 
  -2  -2   7   39.60    3.50 
   1   2  -7  474.35   18.70 
   1   2  -7  470.35   18.80 
   1   2  -7  456.95   18.00 
   1   2  -7  565.94   17.20 
  -1  -2   7  478.65   18.10 
  -1  -2   7  492.25   18.90 
  -1  -2   7  576.94   17.20 
  -1  -2   7  453.85   18.50 
   0   2  -7    0.80    1.50 
   0   2  -7   -0.70    1.20 
   0   2  -7    1.10    1.20 
   0  -2   7    0.70    1.70 
   0  -2   7   -0.50    1.40 
   0  -2   7    0.40    1.00 
  -1   2  -7  745.13   23.70 
  -1   2  -7  690.93   24.30 
  -1   2  -7  706.13   24.40 
  -1   2  -7  679.53   24.10 
   1  -2   7  693.63   24.70 
   1  -2   7  685.23   24.60 
   1  -2   7  720.73   23.90 
  -2   2  -7   16.40    2.60 
  -2   2  -7   14.10    2.10 
  -2   2  -7   16.70    2.20 
   2  -2   7   17.00    2.60 
   2  -2   7   16.00    2.20 
   2  -2   7   15.90    2.70 
   2  -2   7   15.00    2.50 
  -3   2  -7  183.48    8.20 
  -3   2  -7  182.58    9.20 
  -3   2  -7  169.68    9.70 
   3  -2   7  183.28    8.50 
   3  -2   7  198.08    9.90 
   3  -2   7  180.98    8.50 
  -4   2  -7   13.90    3.60 
  -4   2  -7   14.80    3.20 
   4  -2   7   10.10    2.60 
  -5   2  -7   -0.60    1.60 
  -6   2  -7   13.90    4.10 
  -7   2  -7   11.00    3.40 
  -8   2  -7    2.70    3.00 
  -9   2  -7   -6.30    2.70 
   9   1  -7   -3.10    4.20 
  -9  -1   7    4.20    3.50 
   8   1  -7   59.59    9.10 
   7   1  -7    1.00    3.40 
   6   1  -7   25.20    5.40 
   5   1  -7   39.60    5.50 
  -5  -1   7   34.80    4.30 
   4   1  -7   57.39    5.00 
   4   1  -7   54.89    4.60 
   4   1  -7   61.09    5.60 
   4   1  -7   55.99    3.90 
  -4  -1   7   56.89    4.10 
  -4  -1   7   55.09    4.70 
   3   1  -7    4.90    1.70 
   3   1  -7    3.00    1.60 
   3   1  -7    3.70    1.40 
  -3  -1   7    5.30    1.70 
  -3  -1   7    9.90    1.90 
   2   1  -7  132.09    6.50 
   2   1  -7  125.79    6.70 
   2   1  -7  126.69    6.20 
  -2  -1   7  124.19    6.40 
  -2  -1   7  129.89    6.20 
  -2  -1   7  124.39    6.20 
  -2  -1   7  127.49    6.80 
   1   1  -7   27.20    3.30 
   1   1  -7   24.30    3.00 
   1   1  -7   34.10    2.70 
  -1  -1   7   32.80    2.50 
  -1  -1   7   28.60    3.50 
  -1  -1   7   24.60    2.50 
   0   1  -7    0.10    1.00 
   0   1  -7    2.10    1.40 
   0   1  -7    1.50    1.40 
   0  -1   7   -0.20    0.70 
   0  -1   7    1.10    1.20 
   0  -1   7    2.80    1.50 
   0  -1   7    0.40    1.10 
  -1   1  -7   77.89    4.40 
  -1   1  -7   83.69    4.60 
  -1   1  -7   84.79    4.30 
  -1   1  -7   84.59    4.80 
   1  -1   7   84.19    5.00 
   1  -1   7   89.89    4.50 
  -2   1  -7  272.87   10.60 
  -2   1  -7  288.77   11.10 
   2  -1   7  290.67   11.50 
   2  -1   7  283.27   10.90 
   2  -1   7  271.47   10.10 
   2  -1   7  278.47   10.50 
  -3   1  -7    9.20    2.40 
  -3   1  -7   10.40    2.20 
   3  -1   7   12.90    2.50 
  -4   1  -7    0.90    1.40 
  -4   1  -7   -2.70    1.20 
  -5   1  -7   23.80    4.40 
  -5   1  -7   16.70    3.40 
  -6   1  -7    8.70    3.30 
  -7   1  -7    1.40    2.90 
  -8   1  -7    7.70    3.90 
  -9   1  -7    3.20    4.30 
   9   0  -7    7.80    4.80 
  -9   0   7   -3.70    3.10 
   8   0  -7    6.10    4.00 
  -8   0   7    3.10    2.60 
   7   0  -7    1.20    3.20 
   6   0  -7    1.60    3.00 
   5   0  -7    0.90    2.30 
  -5   0   7    6.60    2.30 
   4   0  -7    0.30    1.90 
  -4   0   7    0.50    1.50 
   3   0  -7    0.30    2.70 
   3   0  -7    1.40    1.30 
   3   0  -7    1.50    1.60 
   3   0  -7    3.70    1.20 
  -3   0   7    2.30    1.60 
  -3   0   7    3.30    1.30 
   2   0  -7   24.70    2.70 
   2   0  -7   24.70    3.00 
   2   0  -7   22.20    3.00 
   2   0  -7   25.10    2.50 
  -2   0   7   25.90    3.10 
  -2   0   7   21.90    2.80 
  -2   0   7   19.90    2.50 
  -2   0   7   21.80    2.50 
   1   0  -7  145.59    6.30 
   1   0  -7  135.59    6.40 
   1   0  -7  147.19    7.30 
   1   0  -7  145.59    6.30 
  -1   0   7  134.39    6.10 
  -1   0   7  131.79    6.40 
  -1   0   7  152.78    7.40 
   0   0  -7    4.30    1.10 
   0   0  -7    4.90    1.20 
   0   0  -7    4.30    1.30 
   0   0  -7    3.60    1.60 
   0   0   7    5.60    1.20 
   0   0   7    4.80    1.20 
   0   0   7    4.60    1.40 
  -1   0  -7   39.20    2.80 
  -1   0  -7   44.10    2.60 
  -1   0  -7   38.00    3.70 
  -1   0  -7   37.30    2.70 
   1   0   7   40.70    3.50 
   1   0   7   49.80    2.80 
  -2   0  -7  417.46   13.80 
  -2   0  -7  354.66   15.90 
   2   0   7  358.66   13.90 
   2   0   7  396.86   13.10 
   2   0   7  387.46   14.20 
   2   0   7  398.56   13.90 
  -3   0  -7   48.20    4.10 
  -3   0  -7   44.50    3.50 
   3   0   7   48.80    4.00 
  -4   0  -7   54.89    4.70 
  -4   0  -7   50.09    5.00 
  -5   0  -7   23.60    5.40 
  -5   0  -7   23.70    3.70 
  -6   0  -7   34.90    5.10 
  -6   0  -7   30.20    5.70 
  -7   0  -7    3.90    2.40 
  -8   0  -7    5.80    3.20 
  -9   0  -7    4.10    3.40 
   9  -1  -7   -5.20    3.40 
  -9   1   7    4.80    4.10 
   8  -1  -7    0.00    3.60 
  -8   1   7    2.10    3.20 
   7  -1  -7    1.60    2.90 
   6  -1  -7    3.80    3.80 
   5  -1  -7    2.80    2.80 
   4  -1  -7   41.00    9.20 
   4  -1  -7   35.00    5.50 
   4  -1  -7   51.99    5.10 
  -4   1   7   51.59    6.80 
  -4   1   7   37.80    4.40 
   3  -1  -7   10.20    1.90 
   3  -1  -7    5.70    2.30 
   3  -1  -7   11.60    1.90 
   3  -1  -7   12.60    2.80 
   3  -1  -7   10.90    2.10 
  -3   1   7   12.60    2.00 
  -3   1   7   12.00    2.60 
   2  -1  -7  210.48    8.80 
   2  -1  -7  211.28    9.70 
   2  -1  -7  203.68    8.40 
  -2   1   7  192.98    8.50 
  -2   1   7  211.98    9.50 
  -2   1   7  210.08    9.30 
  -2   1   7  211.88    8.60 
   1  -1  -7   41.40    3.30 
   1  -1  -7   39.40    2.90 
   1  -1  -7   33.90    3.10 
   1  -1  -7   39.50    3.90 
  -1   1   7   36.60    3.50 
  -1   1   7   29.30    4.70 
  -1   1   7   36.70    3.80 
  -1   1   7   38.50    3.00 
   0  -1  -7   25.00    2.40 
   0  -1  -7   27.00    3.40 
   0  -1  -7   18.30    2.30 
   0  -1  -7   28.10    2.70 
   0   1   7   25.20    3.40 
   0   1   7   27.10    2.70 
   0   1   7   27.70    2.00 
   0   1   7   26.80    2.40 
  -1  -1  -7   43.10    3.20 
  -1  -1  -7   40.00    3.70 
  -1  -1  -7   44.40    2.60 
  -1  -1  -7   41.00    2.90 
   1   1   7   44.10    4.00 
   1   1   7   46.10    2.30 
  -2  -1  -7   67.19    3.30 
  -2  -1  -7   70.09    3.80 
  -2  -1  -7   64.99    3.70 
   2   1   7   65.79    4.60 
   2   1   7   66.19    3.80 
   2   1   7   69.49    4.00 
   2   1   7   63.89    3.50 
  -3  -1  -7    6.20    1.40 
  -3  -1  -7    5.60    1.70 
  -4  -1  -7  129.89    7.00 
  -4  -1  -7  109.29    7.40 
  -5  -1  -7    6.50    2.20 
  -5  -1  -7    0.80    2.10 
  -6  -1  -7  185.28   11.60 
  -6  -1  -7  164.18   10.60 
  -7  -1  -7    1.50    2.20 
  -8  -1  -7    6.00    4.40 
  -9  -1  -7    4.20    3.10 
   9  -2  -7    4.90    4.10 
  -9   2   7   -3.20    3.30 
   8  -2  -7   -2.90    4.00 
  -8   2   7   -0.40    3.10 
   7  -2  -7   -5.00    3.30 
  -7   2   7    3.20    2.60 
   6  -2  -7   60.79    8.50 
   5  -2  -7   47.00    4.50 
   5  -2  -7   44.60    5.40 
   5  -2  -7   41.30    6.40 
  -5   2   7   43.20    4.20 
   4  -2  -7  236.08   10.00 
   4  -2  -7  236.78   10.30 
   4  -2  -7  226.48   13.20 
   4  -2  -7  236.38   11.90 
   4  -2  -7  230.78   10.60 
  -4   2   7  240.68   10.50 
  -4   2   7  226.88   12.40 
   3  -2  -7   -1.00    0.80 
   3  -2  -7    2.70    1.40 
   3  -2  -7    1.90    1.70 
   3  -2  -7    0.90    1.20 
   3  -2  -7    2.50    1.80 
  -3   2   7    0.40    0.90 
  -3   2   7    3.00    1.30 
  -3   2   7   -0.20    1.40 
  -3   2   7    0.80    1.30 
   2  -2  -7  188.18    8.70 
   2  -2  -7  192.68    9.60 
   2  -2  -7  190.38    8.40 
  -2   2   7  182.28    8.40 
  -2   2   7  195.08    9.50 
  -2   2   7  197.98    9.40 
  -2   2   7  197.38    8.70 
   1  -2  -7   36.40    3.30 
   1  -2  -7   36.10    3.20 
   1  -2  -7   36.70    3.40 
   1  -2  -7   28.60    2.90 
   1  -2  -7   30.20    3.90 
  -1   2   7   33.60    3.10 
  -1   2   7   32.30    3.80 
  -1   2   7   35.30    3.30 
  -1   2   7   37.20    3.20 
   0  -2  -7    4.80    2.40 
   0  -2  -7    8.50    1.80 
   0  -2  -7    4.90    2.30 
   0  -2  -7    3.80    1.60 
   0  -2  -7    4.60    1.40 
   0   2   7    7.70    1.80 
   0   2   7    8.20    1.40 
   0   2   7    6.20    1.80 
   0   2   7    7.10    2.50 
  -1  -2  -7   -1.60    1.20 
  -1  -2  -7   -0.90    1.00 
  -1  -2  -7    0.20    1.00 
  -1  -2  -7    0.50    0.90 
   1   2   7   -0.60    1.00 
   1   2   7    0.60    1.40 
   1   2   7    0.50    0.40 
  -2  -2  -7  444.56   16.20 
  -2  -2  -7  450.35   16.20 
  -2  -2  -7  437.16   15.90 
  -2  -2  -7  428.86   16.60 
   2   2   7  433.96   16.30 
   2   2   7  453.85   17.50 
  -3  -2  -7    4.80    1.60 
  -3  -2  -7    4.30    1.60 
   3   2   7    5.30    1.90 
   3   2   7    2.40    2.00 
  -4  -2  -7   33.70    3.70 
  -4  -2  -7   34.70    3.20 
  -4  -2  -7   36.10    3.50 
   4   2   7   33.00    3.70 
  -5  -2  -7    1.10    1.60 
  -5  -2  -7    3.60    1.90 
   5   2   7    2.80    2.30 
  -6  -2  -7   24.80    4.20 
  -6  -2  -7   26.60    4.50 
  -7  -2  -7    1.30    2.70 
  -7  -2  -7   -3.60    2.20 
  -8  -2  -7    0.30    3.50 
  -9  -2  -7   13.80    4.30 
   8  -3  -7   17.10    6.40 
  -8   3   7   23.90    6.10 
   7  -3  -7   -2.90    3.30 
  -7   3   7   -1.80    2.70 
   6  -3  -7   82.89    9.70 
   6  -3  -7   72.39    6.70 
   6  -3  -7   81.29    8.30 
  -6   3   7   63.49    8.00 
   5  -3  -7    1.00    1.70 
   5  -3  -7   -0.20    2.10 
   5  -3  -7    0.50    2.40 
   5  -3  -7   -1.70    2.10 
   4  -3  -7   25.90    3.00 
   4  -3  -7   27.80    3.80 
   4  -3  -7   31.20    8.60 
   4  -3  -7   26.20    4.90 
   4  -3  -7   27.90    4.00 
  -4   3   7   29.90    5.00 
   3  -3  -7    0.50    1.60 
   3  -3  -7    1.40    1.60 
   3  -3  -7    2.00    1.90 
   3  -3  -7    1.20    1.50 
   3  -3  -7    0.40    1.10 
  -3   3   7   -1.70    1.50 
  -3   3   7    1.10    1.70 
  -3   3   7    1.50    1.50 
  -3   3   7   -2.10    1.60 
   2  -3  -7    2.40    1.40 
   2  -3  -7    2.00    1.40 
   2  -3  -7    2.60    2.20 
   2  -3  -7    4.10    1.90 
  -2   3   7    2.70    1.50 
  -2   3   7    4.20    1.70 
  -2   3   7    3.80    1.70 
  -2   3   7    1.80    1.60 
  -2   3   7    3.70    1.90 
   1  -3  -7    0.40    1.30 
   1  -3  -7    0.50    1.20 
   1  -3  -7   -1.10    1.30 
   1  -3  -7    0.50    1.10 
   1  -3  -7    0.10    1.20 
  -1   3   7   -0.30    1.00 
  -1   3   7    0.40    1.30 
  -1   3   7    1.70    1.60 
  -1   3   7   -1.00    0.70 
  -1   3   7    1.10    1.30 
   0  -3  -7    1.10    1.50 
   0  -3  -7   -0.70    1.10 
   0  -3  -7   -1.30    0.80 
   0  -3  -7    0.30    1.10 
   0  -3  -7    1.50    1.20 
   0   3   7    0.50    1.10 
   0   3   7    0.20    1.10 
   0   3   7    1.70    1.60 
   0   3   7    1.50    1.80 
   0   3   7   -0.90    0.80 
  -1  -3  -7    4.60    1.90 
  -1  -3  -7    0.70    1.20 
  -1  -3  -7    1.30    1.40 
  -1  -3  -7    0.90    1.30 
   1   3   7    1.80    1.90 
   1   3   7    2.00    1.20 
   1   3   7    1.60    1.50 
  -2  -3  -7  138.49    7.50 
  -2  -3  -7  155.08    8.10 
  -2  -3  -7  148.69    7.90 
  -2  -3  -7  135.59    8.20 
   2   3   7  140.89    7.40 
   2   3   7  158.88    9.30 
  -3  -3  -7   99.19    6.60 
  -3  -3  -7   86.29    5.90 
   3   3   7   94.29    6.40 
   3   3   7   92.19    5.50 
   3   3   7  101.59    7.60 
  -4  -3  -7   19.60    3.10 
  -4  -3  -7   19.10    3.30 
   4   3   7   19.50    4.30 
   4   3   7   22.90    3.70 
  -5  -3  -7   -1.90    1.60 
   5   3   7   -3.80    2.10 
   5   3   7   -1.00    2.50 
  -6  -3  -7    7.70    2.60 
  -6  -3  -7    3.30    2.10 
   6   3   7   18.60    4.00 
   7   3   7   13.70    4.30 
  -9  -3  -7    6.40    4.40 
   9  -4  -7   -1.10    4.70 
  -9   4   7   -2.70    3.70 
   8  -4  -7   22.20    5.60 
   8  -4  -7   22.60    7.00 
  -8   4   7   17.20    6.10 
   7  -4  -7    6.20    4.80 
   7  -4  -7    1.90    4.00 
   7  -4  -7    5.30    3.10 
  -7   4   7   -0.90    2.70 
   6  -4  -7   13.30    5.10 
   6  -4  -7   11.40    4.70 
   6  -4  -7   10.20    3.70 
  -6   4   7   13.70    4.30 
   5  -4  -7    0.50    3.10 
   5  -4  -7    0.30    2.00 
   5  -4  -7    3.80    2.30 
   5  -4  -7    5.40    3.50 
  -5   4   7    2.60    2.50 
   4  -4  -7    9.90    3.90 
   4  -4  -7    4.00    2.70 
   4  -4  -7    3.50    2.70 
   4  -4  -7    5.70    2.70 
  -4   4   7    7.30    2.80 
  -4   4   7    2.50    2.50 
   3  -4  -7    8.50    2.10 
   3  -4  -7    8.50    2.90 
   3  -4  -7   12.00    2.60 
   3  -4  -7    7.20    2.70 
  -3   4   7    9.00    2.40 
  -3   4   7   10.30    3.10 
  -3   4   7    5.40    2.10 
  -3   4   7    2.80    2.30 
  -3   4   7   10.10    2.90 
   2  -4  -7    0.00    1.90 
   2  -4  -7    1.20    1.80 
   2  -4  -7   -0.60    1.90 
   2  -4  -7    1.60    1.40 
   2  -4  -7    3.00    1.60 
  -2   4   7    2.30    1.80 
  -2   4   7    0.00    1.20 
  -2   4   7   -0.80    1.50 
  -2   4   7   -3.10    1.70 
  -2   4   7    0.30    1.60 
   1  -4  -7    2.70    1.60 
   1  -4  -7    3.40    2.10 
   1  -4  -7    0.80    2.40 
   1  -4  -7    2.80    1.80 
   1  -4  -7    0.20    1.50 
  -1   4   7    4.60    2.00 
  -1   4   7    2.80    1.80 
  -1   4   7    4.60    1.80 
  -1   4   7    2.50    1.30 
  -1   4   7    2.60    2.00 
   0  -4  -7    7.10    2.40 
   0  -4  -7    8.30    1.80 
   0  -4  -7    7.70    2.90 
   0  -4  -7    7.00    2.30 
   0  -4  -7   10.30    3.00 
   0   4   7    5.70    1.40 
   0   4   7    9.90    2.50 
   0   4   7   10.90    1.90 
   0   4   7    6.90    2.30 
   0   4   7   11.20    3.60 
  -1  -4  -7   30.70    3.90 
  -1  -4  -7   33.00    4.40 
  -1  -4  -7   29.40    3.70 
  -1  -4  -7   29.80    4.00 
   1   4   7   27.60    4.00 
   1   4   7   31.40    3.60 
   1   4   7   28.20    4.50 
  -2  -4  -7    1.80    1.80 
  -2  -4  -7    3.90    2.10 
  -2  -4  -7   -1.50    1.20 
   2   4   7    0.30    1.30 
   2   4   7   -0.10    1.60 
   2   4   7   -2.60    1.80 
  -3  -4  -7    3.30    1.80 
  -3  -4  -7    2.90    1.80 
  -3  -4  -7    2.40    1.60 
  -3  -4  -7   -1.00    1.70 
   3   4   7    1.50    2.30 
   3   4   7    4.50    2.40 
   3   4   7    0.60    1.40 
  -4  -4  -7    4.40    2.00 
  -4  -4  -7    3.70    2.20 
   4   4   7    7.00    3.40 
   4   4   7    4.60    3.20 
  -5  -4  -7    1.70    2.10 
  -5  -4  -7    1.00    2.00 
   5   4   7    3.60    2.90 
   5   4   7    3.80    3.20 
   6   4   7    0.40    3.30 
   6   4   7    3.60    3.30 
   7   4   7    7.30    3.90 
   7   4   7    8.90    4.80 
   8   4   7    9.80    4.80 
   8  -5  -7   -6.20    3.50 
   8  -5  -7    6.80    3.90 
  -8   5   7    1.70    3.50 
   7  -5  -7   -4.10    4.10 
   7  -5  -7    0.10    2.50 
   7  -5  -7    2.50    3.80 
  -7   5   7    2.00    2.80 
   6  -5  -7    3.80    2.60 
   6  -5  -7    4.40    3.80 
   6  -5  -7    4.40    4.10 
   6  -5  -7    1.80    2.70 
  -6   5   7    4.50    3.60 
   5  -5  -7   48.40    7.60 
   5  -5  -7   51.09    6.00 
   5  -5  -7   50.99    6.40 
   5  -5  -7   63.29    7.90 
  -5   5   7   57.29    7.10 
   4  -5  -7   18.00    4.50 
   4  -5  -7   23.30    5.40 
   4  -5  -7   22.10    4.40 
  -4   5   7   24.80    7.40 
  -4   5   7   19.70    3.80 
  -4   5   7   18.80    4.20 
   3  -5  -7    3.80    2.50 
   3  -5  -7   -0.80    1.80 
   3  -5  -7    1.40    2.40 
   3  -5  -7    2.60    3.00 
  -3   5   7    0.90    1.60 
  -3   5   7    3.80    2.60 
  -3   5   7    0.50    2.50 
   2  -5  -7   24.40    5.10 
   2  -5  -7   17.10    4.40 
   2  -5  -7   17.00    4.00 
   2  -5  -7   20.00    4.80 
  -2   5   7   31.10    4.10 
  -2   5   7   19.20    3.90 
  -2   5   7   33.10    4.50 
   1  -5  -7   12.20    2.90 
   1  -5  -7   14.40    4.10 
   1  -5  -7    9.20    2.70 
   1  -5  -7    9.80    3.80 
   1  -5  -7    8.70    2.90 
  -1   5   7   12.30    2.50 
  -1   5   7   11.90    3.00 
  -1   5   7   15.50    3.20 
  -1   5   7   12.60    4.10 
  -1   5   7   10.70    2.80 
   0  -5  -7    2.00    2.70 
   0  -5  -7    5.10    2.50 
   0  -5  -7    4.50    2.30 
   0   5   7    5.50    3.00 
   0   5   7    1.00    1.60 
   0   5   7    4.50    2.30 
   0   5   7    6.50    2.30 
  -1  -5  -7   57.59    6.20 
  -1  -5  -7   53.19    5.30 
  -1  -5  -7   52.19    5.70 
  -1  -5  -7   46.80    6.20 
   1   5   7   57.49    6.00 
   1   5   7   59.39    5.50 
   1   5   7   59.69    7.10 
  -2  -5  -7    7.60    2.90 
  -2  -5  -7    7.50    3.10 
  -2  -5  -7   12.40    3.10 
  -2  -5  -7    8.20    3.10 
   2   5   7    5.50    2.60 
   2   5   7    9.50    3.80 
  -3  -5  -7   29.20    4.60 
  -3  -5  -7   22.00    4.60 
  -3  -5  -7   19.00    3.90 
   3   5   7   22.20    5.40 
   3   5   7   20.60    4.50 
  -4  -5  -7   38.10    5.20 
  -4  -5  -7   32.90    5.70 
  -4  -5  -7   35.90    5.30 
   4   5   7   38.30    5.90 
   4   5   7   39.70    7.40 
  -5  -5  -7    2.20    2.10 
  -5  -5  -7    7.10    2.70 
   5   5   7    4.80    3.10 
   5   5   7   -1.40    3.40 
  -6  -5  -7    0.70    2.70 
  -6  -5  -7    1.80    2.90 
   6   5   7   -0.30    3.60 
   6   5   7   -5.00    3.10 
   7   5   7    7.80    4.50 
   7   5   7    4.70    5.00 
   8   5   7   11.70    5.10 
  -8   6   7   -4.50    2.80 
   7  -6  -7    1.10    3.40 
   7  -6  -7    6.60    3.10 
   7  -6  -7   -3.90    5.20 
  -7   6   7    1.50    3.20 
   6  -6  -7   -1.70    2.60 
   6  -6  -7   -9.40    4.20 
   6  -6  -7    0.60    3.60 
   6  -6  -7   -1.00    3.40 
  -6   6   7    0.80    2.80 
   5  -6  -7    0.80    3.80 
   5  -6  -7   -1.30    4.10 
  -5   6   7    7.70    4.40 
  -5   6   7    5.20    2.60 
   4  -6  -7    0.90    2.50 
   4  -6  -7   -4.40    3.10 
   4  -6  -7    4.90    3.40 
   4  -6  -7    2.50    3.40 
  -4   6   7    1.30    3.00 
  -4   6   7    2.60    2.60 
  -4   6   7    4.30    2.30 
   3  -6  -7   34.90    7.10 
   3  -6  -7   31.10    5.50 
   3  -6  -7   38.10    6.60 
   3  -6  -7   30.10    5.50 
  -3   6   7   35.10    5.30 
  -3   6   7   45.60    6.50 
  -3   6   7   36.00    5.20 
   2  -6  -7    8.10    3.20 
   2  -6  -7    5.60    2.50 
   2  -6  -7   11.80    4.50 
   2  -6  -7    7.80    3.20 
  -2   6   7    6.60    3.40 
  -2   6   7   11.40    3.20 
  -2   6   7    6.70    2.70 
  -2   6   7    9.60    3.30 
   1  -6  -7    5.00    2.50 
   1  -6  -7    3.00    2.80 
   1  -6  -7    0.70    1.60 
  -1   6   7    2.20    2.70 
  -1   6   7   -1.60    2.40 
  -1   6   7    6.40    2.70 
  -1   6   7   -1.40    1.40 
  -1   6   7    1.80    2.10 
   0  -6  -7    4.10    2.20 
   0  -6  -7    1.40    2.30 
   0  -6  -7    6.00    2.50 
   0  -6  -7    4.30    2.70 
   0   6   7    6.20    2.40 
   0   6   7    3.20    1.60 
   0   6   7    2.60    2.30 
   0   6   7    3.60    3.00 
   0   6   7   -0.80    2.20 
  -1  -6  -7   26.60    5.70 
  -1  -6  -7   27.30    4.80 
  -1  -6  -7   25.30    5.30 
  -1  -6  -7   32.10    6.10 
   1   6   7   24.40    5.60 
   1   6   7   32.60    5.40 
   1   6   7   27.40    5.30 
  -2  -6  -7   18.90    4.40 
  -2  -6  -7   19.70    4.10 
  -2  -6  -7   17.10    4.40 
   2   6   7    9.80    4.30 
   2   6   7   14.70    5.00 
  -3  -6  -7    7.70    3.40 
  -3  -6  -7   11.70    3.80 
  -3  -6  -7   11.20    3.70 
   3   6   7    9.40    4.30 
   3   6   7   14.40    5.20 
  -4  -6  -7    5.50    2.90 
  -4  -6  -7    2.80    3.30 
  -4  -6  -7   10.60    3.80 
   4   6   7    3.40    2.20 
   4   6   7    8.80    4.90 
  -5  -6  -7    6.10    3.00 
  -5  -6  -7    3.90    2.80 
   5   6   7    2.70    3.90 
   5   6   7    4.00    4.50 
  -6  -6  -7    9.40    4.10 
  -6  -6  -7    9.70    3.90 
   6   6   7   11.80    6.00 
   6   6   7    6.80    5.70 
  -7  -6  -7    1.50    2.90 
  -7  -6  -7    1.90    3.70 
   7   6   7   -2.60    4.20 
  -7   7   7   -1.50    2.60 
   6  -7  -7    3.60    5.20 
   6  -7  -7    8.20    4.10 
  -6   7   7    2.50    3.20 
   5  -7  -7    9.00    4.90 
   5  -7  -7    3.60    3.40 
  -5   7   7   -3.10    2.60 
  -5   7   7    1.90    2.90 
  -5   7   7   -1.30    2.30 
   4  -7  -7    0.80    4.20 
  -4   7   7   -3.90    2.50 
  -4   7   7    5.40    3.00 
  -4   7   7    0.10    2.60 
   3  -7  -7   16.40    4.40 
   3  -7  -7   24.80    6.30 
  -3   7   7   15.80    4.30 
  -3   7   7   21.80    5.60 
  -3   7   7   15.70    4.30 
   2  -7  -7    6.60    3.60 
   2  -7  -7    8.00    3.30 
   2  -7  -7   14.90    5.00 
  -2   7   7   14.00    3.70 
  -2   7   7    7.40    3.00 
  -2   7   7   12.50    4.40 
   1  -7  -7   -1.50    2.40 
   1  -7  -7   -0.40    2.90 
   1  -7  -7   -3.10    1.90 
  -1   7   7   -0.60    2.40 
  -1   7   7   -4.00    1.90 
  -1   7   7   -1.20    2.70 
   0  -7  -7    5.50    3.00 
   0  -7  -7    3.50    3.10 
   0  -7  -7    1.70    2.70 
   0  -7  -7    4.00    2.40 
   0   7   7    1.20    2.80 
   0   7   7    0.60    1.60 
   0   7   7    2.10    2.50 
   0   7   7    1.80    3.20 
   0   7   7   -1.50    2.80 
  -1  -7  -7   12.00    4.20 
  -1  -7  -7    6.50    3.60 
  -1  -7  -7    3.90    3.20 
   1   7   7   -0.30    3.70 
   1   7   7    6.80    3.30 
   1   7   7   10.10    3.20 
  -2  -7  -7   42.40    8.80 
  -2  -7  -7   56.29    7.30 
   2   7   7   67.19    8.70 
   2   7   7   51.19    8.60 
  -3  -7  -7   13.30    4.20 
  -3  -7  -7   23.20    5.60 
  -3  -7  -7   17.50    5.10 
   3   7   7   22.30    6.20 
   3   7   7   12.30    5.60 
  -4  -7  -7    8.20    3.60 
  -4  -7  -7   16.20    4.50 
  -4  -7  -7    6.60    3.90 
   4   7   7   11.40    5.40 
   4   7   7   14.20    6.10 
  -5  -7  -7    1.50    2.90 
  -5  -7  -7    1.90    3.10 
   5   7   7    7.00    4.80 
  -6  -7  -7   -0.20    3.30 
  -6  -7  -7   10.10    3.80 
   6   7   7   -2.70    4.10 
   6   7   7   -4.00    5.10 
  -7  -7  -7    4.50    3.80 
   7   7   7   -2.70    5.10 
   7  -8  -7    2.90    3.90 
  -7   8   7    2.00    3.90 
   6  -8  -7   -0.80    3.10 
  -6   8   7    0.90    3.30 
   5  -8  -7    2.40    3.90 
   5  -8  -7    7.60    4.90 
   5  -8  -7    3.60    5.60 
  -5   8   7    4.50    3.70 
  -5   8   7    8.60    3.40 
  -5   8   7   10.10    4.70 
   4  -8  -7   -2.40    4.40 
   4  -8  -7    3.30    3.50 
  -4   8   7   -2.30    3.30 
  -4   8   7   -1.60    2.60 
  -4   8   7    1.50    2.90 
   3  -8  -7    0.60    4.60 
   3  -8  -7    4.70    3.90 
   3  -8  -7   -2.60    2.70 
  -3   8   7    1.70    2.70 
  -3   8   7    1.70    2.90 
  -3   8   7   -1.30    3.10 
   2  -8  -7   -0.80    2.70 
   2  -8  -7   -2.60    2.60 
   2  -8  -7   -2.00    3.70 
  -2   8   7   -3.40    2.80 
  -2   8   7    7.00    3.40 
  -2   8   7   -1.30    2.00 
   1  -8  -7   29.20    6.20 
   1  -8  -7   26.40    6.70 
   1  -8  -7   27.50    6.10 
  -1   8   7   32.80    5.20 
  -1   8   7   26.20    5.20 
  -1   8   7   16.30    3.70 
  -1   8   7   16.30    5.50 
   0  -8  -7    6.60    3.00 
   0  -8  -7   -3.10    3.30 
   0  -8  -7    1.60    3.30 
   0   8   7    1.10    2.70 
   0   8   7   -2.30    4.60 
   0   8   7    3.90    3.20 
  -1  -8  -7   10.30    4.30 
  -1  -8  -7   20.80    5.10 
  -1  -8  -7   14.70    4.80 
   1   8   7   16.20    5.20 
   1   8   7   11.30    5.00 
  -2  -8  -7   17.90    5.20 
  -2  -8  -7   16.70    5.00 
  -2  -8  -7    5.20    3.90 
   2   8   7   13.00    5.30 
   2   8   7   16.80    5.40 
  -3  -8  -7    4.00    3.90 
  -3  -8  -7    1.50    3.00 
  -3  -8  -7    2.60    4.10 
   3   8   7    2.70    5.10 
   3   8   7    7.10    4.50 
  -4  -8  -7    1.00    3.20 
  -4  -8  -7   -5.40    3.50 
   4   8   7    0.80    4.20 
   4   8   7    3.30    6.50 
  -5  -8  -7    0.70    2.90 
   5   8   7    5.90    4.90 
   5   8   7    4.70    6.90 
   6  -9  -7   -1.80    3.80 
  -6   9   7    4.60    4.00 
   5  -9  -7    0.70    3.60 
  -5   9   7   -3.80    1.90 
   4  -9  -7    8.10    6.80 
   4  -9  -7    6.10    4.10 
   4  -9  -7    7.20    4.40 
  -4   9   7    6.50    3.10 
   3  -9  -7   -1.90    3.90 
   3  -9  -7   -4.60    4.00 
   3  -9  -7   -1.10    5.20 
  -3   9   7   -3.00    3.00 
  -3   9   7    2.00    3.90 
  -3   9   7   -3.80    3.80 
   2  -9  -7   -0.80    5.00 
   2  -9  -7    4.80    4.30 
   2  -9  -7    6.70    4.60 
  -2   9   7   -1.00    3.80 
  -2   9   7    1.40    3.40 
  -2   9   7    0.80    2.70 
   1  -9  -7    8.80    4.30 
   1  -9  -7    8.60    5.30 
  -1   9   7    7.00    4.50 
  -1   9   7    3.20    2.80 
  -1   9   7   -1.30    4.30 
   0  -9  -7   10.80    3.70 
   0  -9  -7    8.90    5.70 
   0   9   7    5.50    4.80 
   0   9   7   12.60    4.40 
  -1  -9  -7   -1.40    2.90 
  -1  -9  -7    6.60    3.60 
  -1  -9  -7    3.10    3.50 
   1   9   7   -1.00    4.20 
  -2  -9  -7    0.00    3.50 
  -2  -9  -7    0.60    4.10 
   2   9   7   -6.20    3.80 
   2   9   7   -1.40    4.60 
  -3  -9  -7    0.90    3.20 
  -3  -9  -7    8.20    5.20 
  -3  -9  -7    6.10    4.60 
   3   9   7   -1.00    5.80 
   3   9   7   -5.50    4.40 
  -4  -9  -7   -1.40    3.30 
   4   9   7    2.50    4.40 
   5   9   7    6.40    5.70 
  -5  10   7    0.10    3.60 
   4 -10  -7   -0.30    3.80 
  -4  10   7    5.00    3.80 
   3 -10  -7   11.60    5.20 
   3 -10  -7   -3.00    3.80 
  -3  10   7    4.10    3.20 
   2 -10  -7   -1.00    3.60 
   2 -10  -7   -2.90    3.60 
  -2  10   7    6.10    3.90 
  -2  10   7    0.80    4.80 
   1 -10  -7   -5.90    3.10 
   1 -10  -7   -2.10    3.80 
  -1  10   7    1.30    3.00 
   0 -10  -7   -1.60    4.00 
   0 -10  -7    1.50    4.70 
   0  10   7    0.10    2.70 
   0  10   7    3.40    4.20 
   0  10   7   -2.90    5.30 
  -1 -10  -7    1.70    3.70 
  -1 -10  -7    2.50    4.10 
  -1 -10  -7    0.00    4.80 
   1  10   7    3.80    4.20 
  -2 -10  -7   -2.60    3.70 
  -2 -10  -7    3.50    4.60 
   2  10   7    5.50    5.90 
  -3 -10  -7   -0.10    4.20 
   3  10   7    0.70    5.60 
  -4 -10  -7   -1.80    3.90 
   4  10   7    5.00    5.80 
   3 -11  -7   -0.90    5.60 
  -3  11   7    4.40    3.90 
   2 -11  -7    2.30    5.80 
   2 -11  -7    7.00    4.60 
  -2  11   7    5.20    3.70 
   1 -11  -7   -3.90    3.90 
   1 -11  -7   -1.30    5.10 
  -1  11   7   -4.10    6.30 
  -1  11   7    5.90    3.90 
   0 -11  -7   -5.20    4.60 
   0 -11  -7    6.80    5.30 
   0  11   7    8.00    3.70 
   0  11   7    1.90    5.90 
  -1 -11  -7   -1.90    4.30 
   1  11   7    0.30    5.70 
  -2 -11  -7   -5.40    3.80 
   2  11   7    4.30    7.30 
   2  11  -8    8.90    5.00 
   2  11  -8   13.20    9.10 
  -2 -11   8   22.00    7.00 
   1  11  -8    1.30    5.40 
   1  11  -8   -3.60    4.00 
  -1 -11   8    3.80    7.70 
   0  11  -8   10.00    6.60 
   0  11  -8    1.80    4.90 
   0 -11   8    6.30    6.50 
   0 -11   8    1.80    6.40 
  -1  11  -8    2.30    4.80 
   1 -11   8   -0.70    5.70 
   1 -11   8   -4.50    5.40 
  -2  11  -8   -1.70    4.50 
   2 -11   8    5.10    6.60 
  -3  11  -8    7.10    4.80 
   4  10  -8    6.90    6.70 
  -4 -10   8   14.40    6.70 
   3  10  -8   -0.40    3.90 
  -3 -10   8   -5.60    4.30 
   2  10  -8   -3.70    3.30 
  -2 -10   8   12.50    5.50 
  -2 -10   8    4.20    5.20 
   1  10  -8   -0.90    5.10 
   1  10  -8   -1.50    4.10 
  -1 -10   8    5.00    5.50 
  -1 -10   8    0.90    6.50 
   0  10  -8   -3.40    4.40 
   0  10  -8   -6.20    4.30 
   0 -10   8    4.30    5.00 
   0 -10   8   -2.30    5.00 
  -1  10  -8   -4.70    3.60 
  -1  10  -8    5.70    5.30 
  -1  10  -8   -0.10    4.00 
   1 -10   8   10.60    5.10 
   1 -10   8   -4.30    4.30 
  -2  10  -8   -0.80    4.90 
  -2  10  -8   -3.80    3.60 
   2 -10   8    7.20    4.80 
  -3  10  -8    2.90    3.70 
   3 -10   8    3.90    5.20 
   3 -10   8   -1.10    5.00 
  -4  10  -8    2.80    3.60 
   4 -10   8    2.50    5.00 
  -5  10  -8    4.60    3.50 
   5 -10   8    2.30    4.00 
   5   9  -8   15.90    6.20 
  -5  -9   8    3.70    5.20 
   4   9  -8    5.40    8.00 
   4   9  -8    4.60    4.30 
  -4  -9   8    6.90    5.20 
   3   9  -8   -2.20    4.80 
   3   9  -8    6.30    3.40 
   3   9  -8   -5.30    6.10 
  -3  -9   8    2.70    4.00 
  -3  -9   8   -6.70    2.90 
   2   9  -8   -1.70    3.30 
   2   9  -8    5.60    5.20 
   2   9  -8    2.00    4.50 
  -2  -9   8   -2.60    3.20 
  -2  -9   8    2.20    4.20 
   1   9  -8   -1.20    3.70 
   1   9  -8   -3.60    3.40 
  -1  -9   8    4.80    3.80 
  -1  -9   8    4.60    4.60 
   0   9  -8   -3.80    3.80 
   0   9  -8    4.70    3.60 
   0  -9   8    2.00    3.40 
   0  -9   8   -6.80    3.80 
  -1   9  -8   -3.50    3.50 
  -1   9  -8   -0.30    3.10 
  -1   9  -8   -2.60    3.70 
   1  -9   8   -5.40    3.20 
   1  -9   8    2.90    3.70 
  -2   9  -8    9.80    5.10 
  -2   9  -8    4.10    5.50 
   2  -9   8    7.30    8.00 
   2  -9   8   14.60    6.30 
   2  -9   8    8.80    4.30 
  -3   9  -8    3.70    5.00 
  -3   9  -8   -7.50    3.50 
  -3   9  -8    1.80    2.90 
   3  -9   8   -2.30    3.60 
   3  -9   8    1.30    3.80 
   3  -9   8    0.60    4.10 
  -4   9  -8    1.00    2.90 
   4  -9   8    9.70    6.90 
  -5   9  -8    0.60    3.00 
   5  -9   8   -3.40    5.10 
  -6   9  -8   -3.60    3.20 
   6  -9   8   -3.10    4.90 
   6   8  -8    6.90    5.80 
   5   8  -8    9.80    9.50 
   5   8  -8    6.80    4.20 
   5   8  -8    7.50    6.50 
  -5  -8   8    7.50    4.00 
   4   8  -8   12.10    4.30 
   4   8  -8   22.80    7.10 
   4   8  -8   23.30    7.50 
  -4  -8   8   14.20    4.80 
  -4  -8   8   12.40    3.20 
  -4  -8   8   11.50    5.80 
   3   8  -8   -4.20    2.80 
   3   8  -8    8.20    5.90 
   3   8  -8    5.50    4.80 
  -3  -8   8    3.20    2.30 
  -3  -8   8   -4.70    3.10 
  -3  -8   8    3.60    3.60 
   2   8  -8   46.20    6.30 
   2   8  -8   34.80    7.90 
   2   8  -8   57.09    9.10 
  -2  -8   8   42.40    8.80 
  -2  -8   8   36.90    7.20 
  -2  -8   8   44.10    6.20 
   1   8  -8    9.50    4.40 
   1   8  -8    2.70    4.50 
  -1  -8   8    9.90    4.10 
  -1  -8   8    4.80    4.40 
   0   8  -8  195.48   17.10 
   0   8  -8  158.28   12.20 
   0   8  -8  193.88   16.70 
   0  -8   8  205.28   15.40 
  -1   8  -8   13.30    4.20 
  -1   8  -8    3.50    3.80 
  -1   8  -8    4.10    4.00 
   1  -8   8    1.90    3.50 
   1  -8   8   14.30    5.80 
  -2   8  -8   15.50    5.50 
  -2   8  -8   17.10    5.20 
  -2   8  -8   27.90    5.60 
   2  -8   8   18.30    5.70 
   2  -8   8   31.00    7.20 
   2  -8   8   17.10    5.10 
  -3   8  -8   -0.50    3.30 
  -3   8  -8   -0.40    3.60 
   3  -8   8   -1.60    3.00 
   3  -8   8    1.20    4.60 
   3  -8   8    3.70    3.50 
  -4   8  -8    7.30    4.20 
  -4   8  -8    4.40    4.80 
  -4   8  -8   -1.10    2.60 
   4  -8   8    1.90    4.60 
   4  -8   8    2.50    3.00 
   4  -8   8    3.20    4.80 
  -5   8  -8    2.10    2.70 
  -5   8  -8   -0.70    3.20 
   5  -8   8   -1.80    4.20 
   5  -8   8    7.30    5.70 
   5  -8   8   13.10    6.00 
  -6   8  -8    4.20    3.80 
  -6   8  -8    4.40    3.20 
   6  -8   8   12.00    5.10 
  -7   8  -8    2.30    3.00 
   7  -8   8   -6.40    5.30 
   7   7  -8    4.20    5.10 
   7   7  -8   -2.70    3.20 
  -7  -7   8    3.00    3.10 
   6   7  -8    2.20    3.90 
  -6  -7   8   -3.20    2.60 
   5   7  -8    6.70    4.50 
   5   7  -8    2.00    3.10 
   5   7  -8    5.80    5.20 
  -5  -7   8   -0.90    3.60 
  -5  -7   8    1.30    2.20 
  -5  -7   8    6.80    4.20 
   4   7  -8   -5.30    3.70 
   4   7  -8   -6.00    5.20 
  -4  -7   8    1.20    2.90 
  -4  -7   8    1.30    2.20 
  -4  -7   8    1.20    3.20 
   3   7  -8  218.28   16.40 
   3   7  -8  160.58   12.00 
   3   7  -8  160.58   15.10 
  -3  -7   8  205.38   14.90 
  -3  -7   8  212.28   14.60 
   2   7  -8  312.87   19.50 
   2   7  -8  323.77   20.10 
  -2  -7   8  307.67   20.20 
  -2  -7   8  330.37   19.20 
  -2  -7   8  269.47   14.30 
   1   7  -8  122.09   10.20 
   1   7  -8  121.09   11.60 
   1   7  -8  108.39    9.30 
  -1  -7   8  113.19   11.50 
  -1  -7   8  114.79   11.20 
  -1  -7   8  117.69    8.30 
   0   7  -8 1082.09   41.50 
   0   7  -8 1047.50   43.10 
   0   7  -8  933.61   37.70 
   0   7  -8 1116.19   43.50 
   0  -7   8 1131.89   41.50 
   0  -7   8 1090.59   49.60 
   0  -7   8 1061.49   42.90 
   0  -7   8  960.40   38.20 
  -1   7  -8  225.78   15.20 
  -1   7  -8  205.18   12.60 
  -1   7  -8  232.18   16.20 
   1  -7   8  231.68   16.50 
   1  -7   8  222.48   14.70 
   1  -7   8  220.98   16.40 
  -2   7  -8  197.38   14.80 
  -2   7  -8  181.98   12.10 
  -2   7  -8  220.28   14.50 
   2  -7   8  196.78   15.00 
   2  -7   8  181.58   13.20 
   2  -7   8  190.18   15.30 
  -3   7  -8   66.79    8.30 
  -3   7  -8   69.09    8.10 
  -3   7  -8   64.69    7.10 
   3  -7   8   53.59    8.40 
   3  -7   8   62.49    7.40 
   3  -7   8   63.79    8.80 
  -4   7  -8    7.70    3.20 
  -4   7  -8    1.30    2.50 
  -4   7  -8   -0.20    3.00 
   4  -7   8    4.30    3.30 
   4  -7   8    0.20    2.80 
   4  -7   8    1.20    3.70 
  -5   7  -8    3.00    3.30 
  -5   7  -8   -2.40    1.90 
   5  -7   8    4.60    3.30 
   5  -7   8    2.00    3.60 
   5  -7   8   -4.30    3.60 
  -6   7  -8    7.30    3.00 
  -6   7  -8    5.70    3.40 
   6  -7   8    6.70    4.40 
   6  -7   8    4.30    4.80 
   6  -7   8    8.30    4.60 
  -7   7  -8    6.70    3.30 
  -7   7  -8   -1.00    3.90 
   7  -7   8   -3.20    4.80 
   8   6  -8   -7.00    4.40 
  -8  -6   8    6.20    3.30 
   7   6  -8   -1.50    4.10 
   7   6  -8   -3.40    5.50 
   7   6  -8    1.00    5.60 
  -7  -6   8   -0.40    2.90 
   6   6  -8    2.00    3.50 
   6   6  -8    0.10    3.90 
   6   6  -8    1.80    3.70 
  -6  -6   8    1.40    2.70 
  -6  -6   8    5.20    3.20 
   5   6  -8    2.90    3.00 
   5   6  -8    2.30    4.10 
  -5  -6   8    3.90    3.00 
  -5  -6   8    9.00    3.30 
  -5  -6   8    3.50    2.50 
   4   6  -8   49.30    7.90 
   4   6  -8   48.30    5.90 
   4   6  -8   46.40    7.30 
  -4  -6   8   40.10    6.70 
  -4  -6   8   44.20    6.70 
  -4  -6   8   42.40    4.70 
   3   6  -8   -2.10    2.30 
   3   6  -8    3.50    3.70 
  -3  -6   8   -2.70    2.30 
  -3  -6   8    3.60    2.00 
  -3  -6   8    0.80    2.50 
   2   6  -8  280.47   16.10 
   2   6  -8  305.87   18.20 
   2   6  -8  297.17   13.10 
   2   6  -8  277.37   17.30 
  -2  -6   8  274.97   12.70 
  -2  -6   8  291.17   17.10 
  -2  -6   8  296.47   16.70 
   1   6  -8    7.90    3.00 
   1   6  -8   15.90    4.00 
   1   6  -8   12.80    4.50 
  -1  -6   8    8.80    2.50 
  -1  -6   8   11.20    3.60 
  -1  -6   8    7.60    4.40 
  -1  -6   8    9.00    3.60 
   0   6  -8  218.68   12.80 
   0   6  -8  180.08   11.00 
   0   6  -8  191.28   12.80 
   0   6  -8  203.98   13.70 
   0  -6   8  188.88   10.40 
   0  -6   8  200.58   14.00 
   0  -6   8  192.38   12.10 
   0  -6   8  202.58   13.60 
  -1   6  -8   63.49    6.10 
  -1   6  -8   56.19    6.70 
  -1   6  -8   66.79    7.70 
  -1   6  -8   63.89    6.90 
   1  -6   8   67.49    7.80 
   1  -6   8   52.29    5.30 
   1  -6   8   58.59    8.00 
   1  -6   8   58.29    6.40 
  -2   6  -8   54.99    6.70 
  -2   6  -8   48.70    6.90 
  -2   6  -8   57.79    6.10 
   2  -6   8   47.60    6.20 
   2  -6   8   57.39    7.40 
  -3   6  -8   18.40    4.50 
  -3   6  -8   16.10    4.00 
  -3   6  -8   10.60    3.10 
   3  -6   8    8.00    4.00 
   3  -6   8   16.00    5.30 
  -4   6  -8   11.50    3.50 
  -4   6  -8   13.90    3.50 
  -4   6  -8   15.60    4.10 
   4  -6   8   13.00    3.90 
   4  -6   8    9.60    3.90 
  -5   6  -8    9.00    3.10 
  -5   6  -8   12.50    3.70 
   5  -6   8    9.50    3.80 
   5  -6   8    8.90    4.90 
   5  -6   8   15.60    4.10 
  -6   6  -8   -0.80    2.20 
  -6   6  -8    5.30    2.90 
   6  -6   8    6.90    4.70 
   6  -6   8   -3.20    3.30 
   6  -6   8    2.00    3.30 
  -7   6  -8    5.10    3.20 
  -7   6  -8    4.30    2.20 
   7  -6   8    0.10    3.10 
   7  -6   8   11.80    5.70 
  -8   6  -8    5.50    3.50 
   8  -6   8   -2.70    5.40 
   8   5  -8   12.20    6.30 
   8   5  -8    6.40    5.80 
   8   5  -8    7.00    5.60 
   7   5  -8   14.40    5.30 
   7   5  -8   17.80    5.10 
   7   5  -8   20.50    5.00 
  -7  -5   8   10.20    3.70 
   6   5  -8   55.29    7.10 
   6   5  -8   38.70    7.30 
   6   5  -8   42.90    8.00 
  -6  -5   8   39.80    5.40 
  -6  -5   8   43.50    6.50 
   5   5  -8   12.30    4.20 
   5   5  -8    9.00    3.60 
   5   5  -8    8.50    4.40 
  -5  -5   8   12.50    3.90 
  -5  -5   8   11.30    3.30 
   4   5  -8   62.89    6.10 
   4   5  -8   70.09    8.00 
  -4  -5   8   50.99    6.50 
  -4  -5   8   64.29    5.90 
  -4  -5   8   55.49    6.70 
   3   5  -8    6.10    3.30 
   3   5  -8   11.80    3.20 
   3   5  -8   10.30    4.00 
  -3  -5   8    4.10    2.80 
  -3  -5   8    6.70    2.40 
  -3  -5   8    4.60    2.90 
   2   5  -8   11.70    3.50 
   2   5  -8    7.10    3.90 
   2   5  -8   11.40    5.50 
  -2  -5   8    8.90    3.10 
  -2  -5   8    7.90    3.10 
  -2  -5   8    8.90    3.50 
   1   5  -8   30.50    5.20 
   1   5  -8   32.00    5.40 
   1   5  -8   33.20    5.20 
   1   5  -8   29.70    4.50 
  -1  -5   8   31.70    3.30 
  -1  -5   8   30.80    4.90 
  -1  -5   8   30.50    4.30 
  -1  -5   8   28.10    5.40 
   0   5  -8   32.50    5.80 
   0   5  -8   20.40    4.50 
   0   5  -8   20.30    3.50 
   0   5  -8   27.20    4.80 
   0  -5   8   23.30    4.20 
   0  -5   8   22.90    5.30 
   0  -5   8   23.30    4.80 
   0  -5   8   30.90    3.30 
  -1   5  -8    8.30    3.00 
  -1   5  -8    7.30    2.80 
  -1   5  -8   10.60    3.60 
  -1   5  -8   11.80    3.10 
   1  -5   8   11.40    3.10 
   1  -5   8   11.30    3.60 
   1  -5   8   11.10    3.90 
   1  -5   8    6.80    3.50 
  -2   5  -8   55.69    5.40 
  -2   5  -8   58.09    5.90 
  -2   5  -8   57.99    6.20 
   2  -5   8   53.89    5.30 
   2  -5   8   56.09    7.00 
   2  -5   8   58.09    6.60 
   2  -5   8   56.09    5.70 
  -3   5  -8   22.30    4.20 
  -3   5  -8   16.10    3.50 
  -3   5  -8   21.40    4.20 
   3  -5   8   23.10    4.30 
   3  -5   8   18.60    4.40 
  -4   5  -8   37.90    5.20 
  -4   5  -8   42.80    5.50 
   4  -5   8   46.00    7.60 
   4  -5   8   33.40    5.90 
   4  -5   8   35.10    6.40 
  -5   5  -8   14.60    3.60 
  -5   5  -8   15.10    4.20 
   5  -5   8   16.20    4.00 
   5  -5   8   20.30    4.00 
   5  -5   8   25.00    5.40 
  -6   5  -8    4.80    3.10 
  -6   5  -8    2.00    2.50 
   6  -5   8    4.30    3.80 
   6  -5   8    4.10    3.00 
  -7   5  -8    5.80    3.60 
   7  -5   8    1.70    3.10 
   7  -5   8    1.40    4.00 
  -8   5  -8    7.50    3.30 
   8  -5   8    4.70    4.10 
   8   4  -8    6.00    6.00 
   8   4  -8    2.20    4.60 
   8   4  -8   -3.80    3.40 
   7   4  -8    0.30    3.70 
   7   4  -8    0.60    3.90 
   7   4  -8    9.30    4.10 
  -7  -4   8   -1.10    2.20 
   6   4  -8   11.00    4.20 
   6   4  -8    7.70    4.30 
   6   4  -8   11.40    3.90 
  -6  -4   8   11.60    3.40 
   5   4  -8    6.70    3.70 
   5   4  -8   13.90    3.80 
   5   4  -8   10.20    5.70 
  -5  -4   8   10.90    3.20 
  -5  -4   8   11.50    2.90 
   4   4  -8   70.99    7.60 
   4   4  -8   74.89    6.40 
   4   4  -8   66.89    7.10 
  -4  -4   8   61.59    6.10 
  -4  -4   8   68.19    6.80 
  -4  -4   8   65.49    5.40 
   3   4  -8  158.88    8.30 
   3   4  -8  157.38   10.40 
   3   4  -8  141.49   10.20 
   3   4  -8  155.88    9.20 
  -3  -4   8  148.59    9.40 
  -3  -4   8  148.49    9.60 
  -3  -4   8  133.59    7.60 
  -3  -4   8  150.68    9.90 
   2   4  -8   26.00    3.80 
   2   4  -8   24.50    3.50 
   2   4  -8   27.00    4.50 
   2   4  -8   24.50    4.70 
  -2  -4   8   27.40    4.20 
  -2  -4   8   32.20    4.70 
  -2  -4   8   31.10    3.50 
  -2  -4   8   24.80    3.70 
   1   4  -8    0.50    1.80 
   1   4  -8    0.80    2.00 
   1   4  -8    0.70    1.90 
  -1  -4   8   -1.20    1.40 
  -1  -4   8    0.90    1.30 
  -1  -4   8    0.20    1.10 
  -1  -4   8    0.10    2.10 
   0   4  -8   37.00    4.70 
   0   4  -8   36.60    4.50 
   0   4  -8   30.20    3.50 
   0   4  -8   34.30    4.10 
   0  -4   8   35.40    4.60 
   0  -4   8   40.20    3.40 
   0  -4   8   33.20    4.00 
   0  -4   8   30.40    5.10 
  -1   4  -8   -0.30    1.50 
  -1   4  -8    1.00    1.40 
  -1   4  -8   -0.80    1.60 
  -1   4  -8   -2.40    1.20 
   1  -4   8   -1.70    1.50 
   1  -4   8    2.70    1.60 
   1  -4   8    1.60    1.30 
   1  -4   8   -0.40    1.80 
  -2   4  -8   96.89    6.80 
  -2   4  -8   97.19    7.10 
  -2   4  -8   85.59    6.50 
   2  -4   8   94.49    7.30 
   2  -4   8   88.59    7.30 
  -3   4  -8  198.28   10.50 
  -3   4  -8  186.58    9.50 
  -3   4  -8  194.98   10.00 
  -3   4  -8  187.68   11.50 
  -3   4  -8  196.58   10.70 
   3  -4   8  211.48   11.40 
   3  -4   8  187.58   10.90 
   3  -4   8  201.78   10.40 
   3  -4   8  198.38   11.50 
  -4   4  -8   77.09    6.30 
  -4   4  -8   66.39    6.70 
   4  -4   8   70.09    6.60 
   4  -4   8   71.39    5.70 
   4  -4   8   69.59    7.10 
  -5   4  -8   19.20    3.50 
  -5   4  -8   19.00    4.00 
   5  -4   8   18.10    3.10 
   5  -4   8   14.50    3.80 
   5  -4   8   17.00    4.10 
  -6   4  -8    3.80    2.00 
   6  -4   8   -1.20    2.60 
  -7   4  -8    0.40    2.50 
   7  -4   8    6.00    2.90 
  -8   4  -8    0.70    2.30 
   8  -4   8   -0.10    2.90 
  -9   4  -8   -4.20    3.50 
   9   3  -8   -3.30    4.50 
   8   3  -8    2.60    4.20 
   8   3  -8   -0.20    3.50 
   7   3  -8    4.50    3.20 
   7   3  -8    7.50    3.80 
   7   3  -8    1.40    3.50 
   6   3  -8    0.10    2.30 
   6   3  -8   -2.60    2.30 
   6   3  -8   -0.20    2.60 
  -6  -3   8   -0.20    1.90 
   5   3  -8   10.40    3.60 
   5   3  -8    6.50    3.30 
   5   3  -8   12.00    3.50 
  -5  -3   8    6.10    2.50 
  -5  -3   8    6.00    2.50 
   4   3  -8   98.69    7.30 
   4   3  -8   93.89    7.60 
   4   3  -8   92.39    7.70 
  -4  -3   8  103.39    6.90 
  -4  -3   8   92.59    6.10 
   3   3  -8   34.10    3.90 
   3   3  -8   42.40    6.00 
  -3  -3   8   37.60    4.20 
  -3  -3   8   29.70    3.30 
  -3  -3   8   38.90    4.60 
  -3  -3   8   38.10    4.40 
   2   3  -8  407.46   18.10 
   2   3  -8  411.96   17.20 
   2   3  -8  415.86   18.10 
   2   3  -8  465.35   16.00 
  -2  -3   8  451.25   15.70 
  -2  -3   8  431.46   18.10 
  -2  -3   8  408.96   17.90 
  -2  -3   8  418.06   17.20 
   1   3  -8   46.30    4.70 
   1   3  -8   48.70    3.80 
   1   3  -8   43.50    4.30 
   1   3  -8   40.00    4.50 
  -1  -3   8   39.60    4.60 
  -1  -3   8   42.40    4.10 
  -1  -3   8   44.90    3.50 
  -1  -3   8   35.40    5.70 
   0   3  -8  333.67   14.40 
   0   3  -8  350.86   15.10 
   0   3  -8  354.16   15.20 
   0   3  -8  355.66   13.10 
   0  -3   8  341.77   13.10 
   0  -3   8  339.97   18.30 
   0  -3   8  340.87   15.10 
   0  -3   8  332.67   14.20 
  -1   3  -8    7.40    2.50 
  -1   3  -8   15.90    2.40 
  -1   3  -8   10.00    2.50 
  -1   3  -8    7.30    2.30 
   1  -3   8    8.70    2.40 
   1  -3   8    9.40    2.10 
   1  -3   8    9.00    2.30 
   1  -3   8    7.30    2.50 
  -2   3  -8  332.07   14.20 
  -2   3  -8  341.37   14.10 
  -2   3  -8  341.97   14.10 
  -2   3  -8  330.37   14.00 
   2  -3   8  341.67   14.80 
   2  -3   8  340.57   14.50 
   2  -3   8  356.26   14.30 
  -3   3  -8   21.80    3.20 
  -3   3  -8   20.90    3.90 
   3  -3   8   27.00    4.50 
   3  -3   8   21.40    3.40 
   3  -3   8   19.30    3.60 
  -4   3  -8   10.30    2.90 
  -4   3  -8    9.60    2.40 
  -4   3  -8   11.50    3.20 
   4  -3   8   10.30    2.60 
   4  -3   8   10.70    2.80 
   4  -3   8    9.10    2.30 
   4  -3   8   13.10    3.30 
  -5   3  -8    4.40    2.20 
   5  -3   8    5.50    2.30 
  -6   3  -8    3.20    2.20 
   6  -3   8    8.60    2.70 
  -7   3  -8   -0.10    2.50 
  -8   3  -8   -0.70    2.30 
  -9   3  -8    4.10    3.90 
   9   2  -8   -2.00    4.40 
  -9  -2   8   -0.90    2.90 
   7   2  -8    1.00    3.10 
   6   2  -8   -2.40    2.50 
   6   2  -8   -0.30    2.40 
   5   2  -8    1.00    2.50 
   5   2  -8    3.40    2.40 
   5   2  -8    2.50    2.20 
  -5  -2   8    4.00    2.20 
  -5  -2   8    8.00    2.40 
   4   2  -8  142.79    8.70 
   4   2  -8  144.59    9.00 
   4   2  -8  149.19    7.90 
   4   2  -8  145.39    9.00 
  -4  -2   8  142.39    7.70 
  -4  -2   8  142.39    8.00 
   3   2  -8  104.09    6.20 
   3   2  -8   95.99    6.80 
   3   2  -8  112.59    7.20 
   3   2  -8  107.69    6.60 
  -3  -2   8  105.79    5.90 
  -3  -2   8  100.99    6.10 
  -3  -2   8  102.89    6.40 
  -3  -2   8  105.19    6.70 
   2   2  -8  161.58    7.50 
   2   2  -8  150.98    8.40 
   2   2  -8  162.78    8.00 
   2   2  -8  131.49    9.50 
  -2  -2   8  157.28    7.80 
  -2  -2   8  162.38    7.00 
  -2  -2   8  161.98    8.60 
  -2  -2   8  143.99    8.10 
   1   2  -8   54.49    4.70 
   1   2  -8   55.09    4.80 
   1   2  -8   51.99    4.10 
   1   2  -8   63.19    3.80 
  -1  -2   8   67.49    4.10 
  -1  -2   8   51.89    4.20 
  -1  -2   8   54.79    4.70 
  -1  -2   8   57.29    4.90 
   0   2  -8 7539.35  237.18 
   0   2  -8 8270.47  236.08 
   0   2  -8 8098.49  239.98 
   0   2  -8 8111.39  238.58 
   0  -2   8 7617.24  237.88 
   0  -2   8 7243.58  238.68 
   0  -2   8 7762.22  238.18 
   0  -2   8 8265.97  236.08 
  -1   2  -8   80.99    5.40 
  -1   2  -8   91.89    5.70 
  -1   2  -8   94.99    5.10 
  -1   2  -8   84.19    5.20 
   1  -2   8   91.49    5.10 
   1  -2   8   85.49    5.60 
   1  -2   8  101.89    6.20 
  -2   2  -8   60.09    4.00 
  -2   2  -8   54.59    4.00 
  -2   2  -8   51.59    4.00 
  -2   2  -8   57.29    3.90 
   2  -2   8   57.79    4.50 
   2  -2   8   60.69    4.00 
   2  -2   8   58.89    4.50 
   2  -2   8   57.89    4.50 
  -3   2  -8  101.89    6.40 
  -3   2  -8   92.29    5.50 
  -3   2  -8   96.69    6.80 
   3  -2   8  101.89    6.50 
   3  -2   8   95.39    5.90 
   3  -2   8  106.59    6.80 
   3  -2   8   95.19    5.90 
  -4   2  -8  196.48   11.50 
  -4   2  -8  201.18   10.60 
   4  -2   8  205.48   11.30 
  -5   2  -8    1.30    2.00 
  -6   2  -8   -1.50    1.90 
  -7   2  -8    3.00    2.60 
  -8   2  -8    3.50    2.80 
  -9   2  -8    6.90    3.30 
   9   1  -8    6.80    4.60 
  -9  -1   8   -5.50    3.30 
   8   1  -8    1.20    3.90 
   7   1  -8    0.50    3.70 
   6   1  -8   -2.40    2.30 
   5   1  -8    3.30    2.60 
   5   1  -8   -1.20    1.70 
   5   1  -8    2.40    2.40 
  -5  -1   8    0.80    1.50 
  -5  -1   8    1.10    1.90 
   4   1  -8   22.70    3.80 
   4   1  -8   27.00    4.40 
   4   1  -8   30.10    2.90 
   4   1  -8   27.70    3.50 
  -4  -1   8   22.90    3.60 
  -4  -1   8   23.20    2.90 
   3   1  -8   99.19    6.40 
   3   1  -8   90.29    6.20 
   3   1  -8   90.19    5.80 
   3   1  -8   93.49    5.30 
  -3  -1   8   94.69    5.70 
  -3  -1   8   94.39    5.30 
   2   1  -8  196.08    8.70 
   2   1  -8  188.08    8.60 
   2   1  -8  191.38    9.00 
  -2  -1   8  178.68    8.80 
  -2  -1   8  201.58    8.60 
  -2  -1   8  208.88    9.50 
  -2  -1   8  210.18    8.50 
   1   1  -8 1647.74   48.00 
   1   1  -8 1538.55   49.50 
   1   1  -8 1490.15   48.90 
   1   1  -8 1385.46   49.99 
  -1  -1   8 1472.45   49.10 
  -1  -1   8 1568.94   49.60 
  -1  -1   8 1430.56   48.30 
  -1  -1   8 1712.33   47.70 
   0   1  -8   10.40    2.10 
   0   1  -8   11.10    2.20 
   0   1  -8   13.10    2.60 
   0   1  -8   12.20    1.90 
   0  -1   8   10.60    1.90 
   0  -1   8   14.30    2.10 
   0  -1   8   10.40    2.20 
   0  -1   8   13.30    2.60 
  -1   1  -8 1603.84   46.40 
  -1   1  -8 1439.16   46.60 
  -1   1  -8 1448.16   47.20 
  -1   1  -8 1407.96   46.60 
   1  -1   8 1543.35   46.60 
   1  -1   8 1455.75   47.50 
  -2   1  -8  219.98    8.90 
  -2   1  -8  234.38    9.40 
   2  -1   8  227.08    9.40 
   2  -1   8  219.78    9.60 
   2  -1   8  223.78    9.10 
   2  -1   8  216.08    8.70 
  -3   1  -8  114.49    6.50 
  -3   1  -8  116.29    7.20 
   3  -1   8  118.49    6.90 
  -4   1  -8   97.19    7.30 
  -4   1  -8   89.79    6.30 
   4  -1   8   91.89    6.70 
  -5   1  -8   42.30    4.90 
  -5   1  -8   48.60    5.70 
  -6   1  -8    2.00    2.30 
  -7   1  -8    3.30    2.20 
  -8   1  -8    9.40    3.40 
  -9   1  -8   -1.70    2.50 
   9   0  -8   -0.60    5.40 
  -9   0   8    0.60    2.80 
   8   0  -8    4.40    4.50 
   7   0  -8   12.30    5.30 
   6   0  -8   89.99    9.10 
   5   0  -8   50.49    6.40 
  -5   0   8   51.29    5.30 
   4   0  -8   97.29    5.30 
   4   0  -8   97.49    7.40 
   4   0  -8   95.29    6.00 
   4   0  -8   94.09    6.60 
  -4   0   8   92.89    5.40 
  -4   0   8   96.59    6.90 
   3   0  -8  121.29    7.40 
   3   0  -8  113.69    5.90 
   3   0  -8  121.39    7.10 
   3   0  -8  110.09    6.10 
  -3   0   8  123.59    6.00 
  -3   0   8  122.39    6.90 
   2   0  -8   52.69    4.10 
   2   0  -8   50.99    3.50 
   2   0  -8   55.39    4.00 
  -2   0   8   45.20    3.60 
  -2   0   8   47.30    3.50 
  -2   0   8   45.70    4.10 
  -2   0   8   49.90    3.80 
   1   0  -8  132.09    6.00 
   1   0  -8  127.09    7.00 
   1   0  -8  137.39    6.40 
   1   0  -8  127.29    6.10 
  -1   0   8  142.59    5.90 
  -1   0   8  106.89    7.20 
  -1   0   8  123.79    7.00 
  -1   0   8  125.49    6.00 
   0   0  -8  142.79    6.50 
   0   0  -8  149.49    5.90 
   0   0  -8  138.89    6.40 
   0   0  -8  137.49    7.30 
   0   0   8  137.19    6.60 
   0   0   8  159.98    6.00 
   0   0   8  147.19    7.50 
   0   0   8  139.89    6.30 
  -1   0  -8  156.18    7.60 
  -1   0  -8  187.78    6.80 
  -1   0  -8  159.78    7.10 
  -1   0  -8  168.38    7.10 
   1   0   8  183.38    6.90 
   1   0   8  170.68    8.10 
  -2   0  -8   76.69    4.80 
  -2   0  -8  101.29    4.80 
   2   0   8   93.49    5.00 
   2   0   8   88.89    4.40 
   2   0   8   91.29    4.60 
   2   0   8   95.79    5.30 
  -3   0  -8    7.70    1.70 
  -3   0  -8    5.70    1.90 
   3   0   8    2.70    1.50 
  -4   0  -8   24.00    3.80 
  -4   0  -8   19.70    3.20 
  -5   0  -8    6.70    2.40 
  -5   0  -8    1.20    4.20 
  -6   0  -8    1.30    2.30 
  -6   0  -8    4.80    3.70 
  -7   0  -8   10.40    3.40 
  -8   0  -8   -3.50    2.90 
  -9   0  -8    4.90    4.00 
   9  -1  -8    3.90    4.90 
  -9   1   8    4.30    4.20 
   8  -1  -8    5.90    4.60 
  -8   1   8    7.30    3.80 
   7  -1  -8    4.60    3.60 
   6  -1  -8   47.50    7.40 
   5  -1  -8    4.40    2.10 
   5  -1  -8    0.90    2.30 
   5  -1  -8    4.80    3.10 
   4  -1  -8  129.59    6.40 
   4  -1  -8  120.99    6.30 
   4  -1  -8  130.19    9.60 
   4  -1  -8  121.59    7.90 
   4  -1  -8  126.09    7.00 
  -4   1   8  126.49    6.60 
  -4   1   8  115.99    8.10 
   3  -1  -8    2.80    2.00 
   3  -1  -8    5.40    2.20 
   3  -1  -8    2.00    1.20 
   3  -1  -8    4.30    1.70 
  -3   1   8    4.70    1.50 
  -3   1   8    2.00    1.60 
   2  -1  -8    1.60    1.40 
   2  -1  -8    1.80    1.10 
   2  -1  -8    1.30    1.20 
  -2   1   8    0.10    0.90 
  -2   1   8    0.50    1.40 
  -2   1   8    0.90    1.30 
  -2   1   8   -0.60    1.10 
   1  -1  -8    9.10    2.40 
   1  -1  -8    9.90    2.00 
   1  -1  -8   12.30    2.30 
   1  -1  -8   12.30    3.20 
  -1   1   8   13.50    2.10 
  -1   1   8    9.30    1.90 
  -1   1   8   15.00    2.90 
  -1   1   8    9.70    2.00 
   0  -1  -8   31.90    2.80 
   0  -1  -8   26.00    3.60 
   0  -1  -8   30.10    2.90 
   0  -1  -8   30.60    2.40 
   0   1   8   25.50    2.60 
   0   1   8   29.90    3.00 
   0   1   8   26.50    2.10 
   0   1   8   31.40    3.80 
  -1  -1  -8    3.70    1.30 
  -1  -1  -8    2.00    1.20 
  -1  -1  -8    0.90    1.40 
  -1  -1  -8    3.00    1.10 
   1   1   8    3.10    0.90 
   1   1   8    1.40    1.70 
  -2  -1  -8    0.10    0.90 
  -2  -1  -8    2.30    0.80 
   2   1   8   -0.20    0.70 
   2   1   8    1.30    1.10 
   2   1   8    2.20    1.10 
   2   1   8    2.00    1.60 
  -3  -1  -8   62.89    3.70 
  -3  -1  -8   63.89    3.80 
  -3  -1  -8   59.89    3.70 
  -3  -1  -8   61.79    4.30 
   3   1   8   67.09    4.30 
  -4  -1  -8  880.51   30.70 
  -4  -1  -8  876.51   29.70 
  -5  -1  -8   30.30    4.30 
  -5  -1  -8   27.50    3.80 
  -6  -1  -8  288.97   13.70 
  -6  -1  -8  250.67   14.40 
  -7  -1  -8    0.60    2.30 
  -8  -1  -8   -0.60    3.10 
  -9  -1  -8   10.00    3.50 
   9  -2  -8   -3.20    3.60 
  -9   2   8    7.60    3.60 
   8  -2  -8    5.90    5.40 
  -8   2   8   -5.70    2.70 
   7  -2  -8   -1.80    3.20 
   6  -2  -8    3.90    2.70 
   6  -2  -8    4.10    4.00 
   5  -2  -8    0.90    2.20 
   5  -2  -8    2.20    2.80 
   5  -2  -8    1.20    2.50 
  -5   2   8    3.60    1.90 
   4  -2  -8   82.99    5.20 
   4  -2  -8   91.49    6.10 
   4  -2  -8   80.69    5.80 
   4  -2  -8   79.39    6.80 
   4  -2  -8   87.09    7.80 
  -4   2   8   86.49    5.70 
  -4   2   8   95.69    7.30 
   3  -2  -8   30.80    4.10 
   3  -2  -8   24.80    2.70 
   3  -2  -8   29.30    3.10 
   3  -2  -8   27.40    4.00 
   3  -2  -8   27.50    3.30 
  -3   2   8   30.90    3.90 
  -3   2   8   28.40    3.40 
  -3   2   8   24.20    2.70
[truncated: 1,030,488 more chars]
