# Supplementary material for: Controllable Fabrication of Organic Cocrystals with Interior Hollow Structure Based on Donor-Acceptor Charge Transfer Molecules
Source: MDPI journal article supplement (doi:10.3390/cryst12121781), 2022-12-08
Supplement: s1 [file s1 › Supporting Information.pdf]

## **Supporting Information**

### **Controllable Fabrication of Organic Cocrystals with Interior Hollow Structure Based on Donor-Acceptor Charge Transfer Molecules**

Yu-Hao Li<sup>1</sup>, Pei-Yao Wang<sup>1</sup>, Zhong-Zhao Duan<sup>1</sup>, Tian-Le Zhang<sup>1</sup>, Fei Tong<sup>1\*</sup>

1. Key Laboratory for Advanced Materials and Joint International Research  
Laboratory of Precision Chemistry and Molecular Engineering,  
Feringa Nobel Prize Scientist Joint Research Center,  
Frontiers Science Center for Materiobiology and Dynamic Chemistry,  
Institute of Fine Chemicals,  
School of Chemistry and Molecular Engineering,  
East China University of Science and Technology,  
Shanghai 200237,  
People's Republic of China;

Emails of Corresponding Authors:  
feitong@ecust.edu.cn

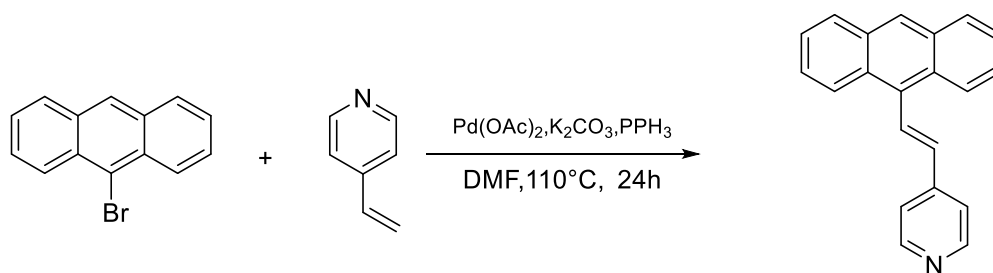

**Figure S1.** Pathway of synthesis of APE.

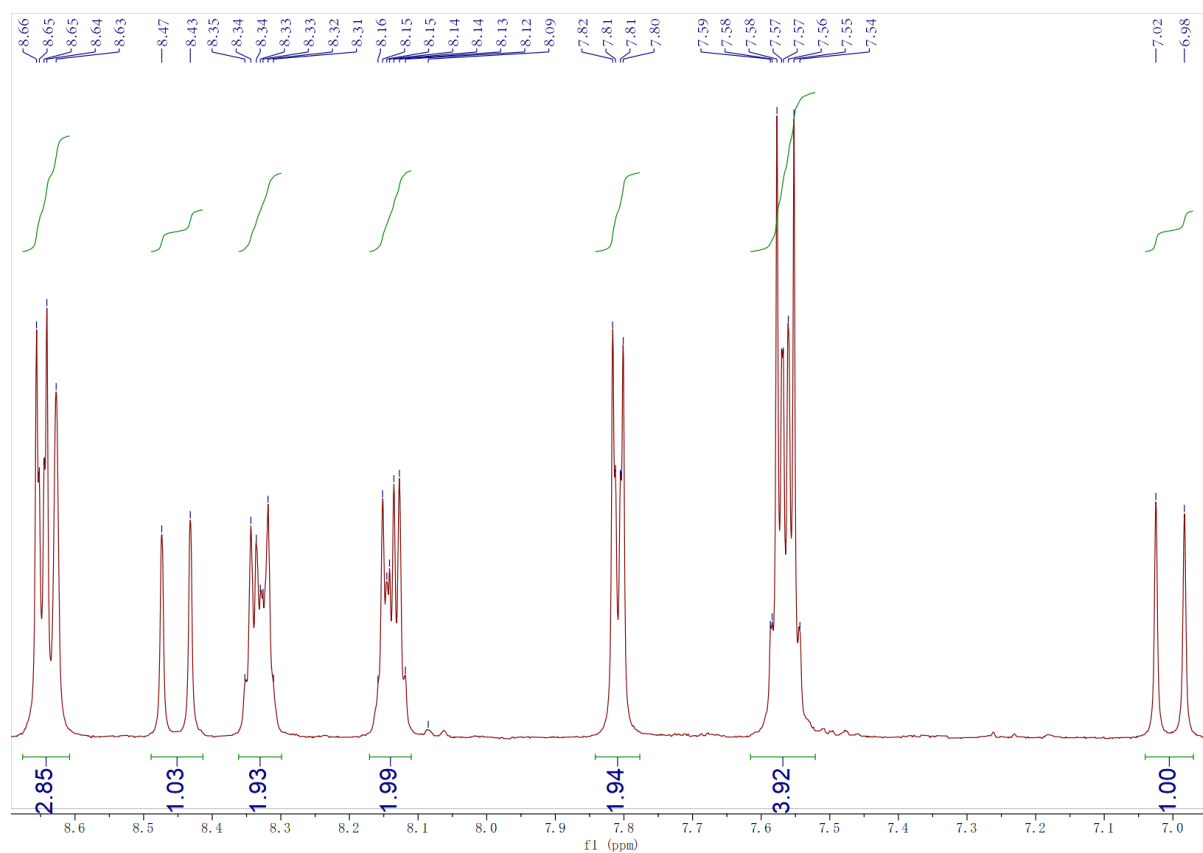

**Figure S2.**  $^1\text{H}$  NMR spectrum of APE (DMSO- $\text{d}_6$  as deuterated solvent).

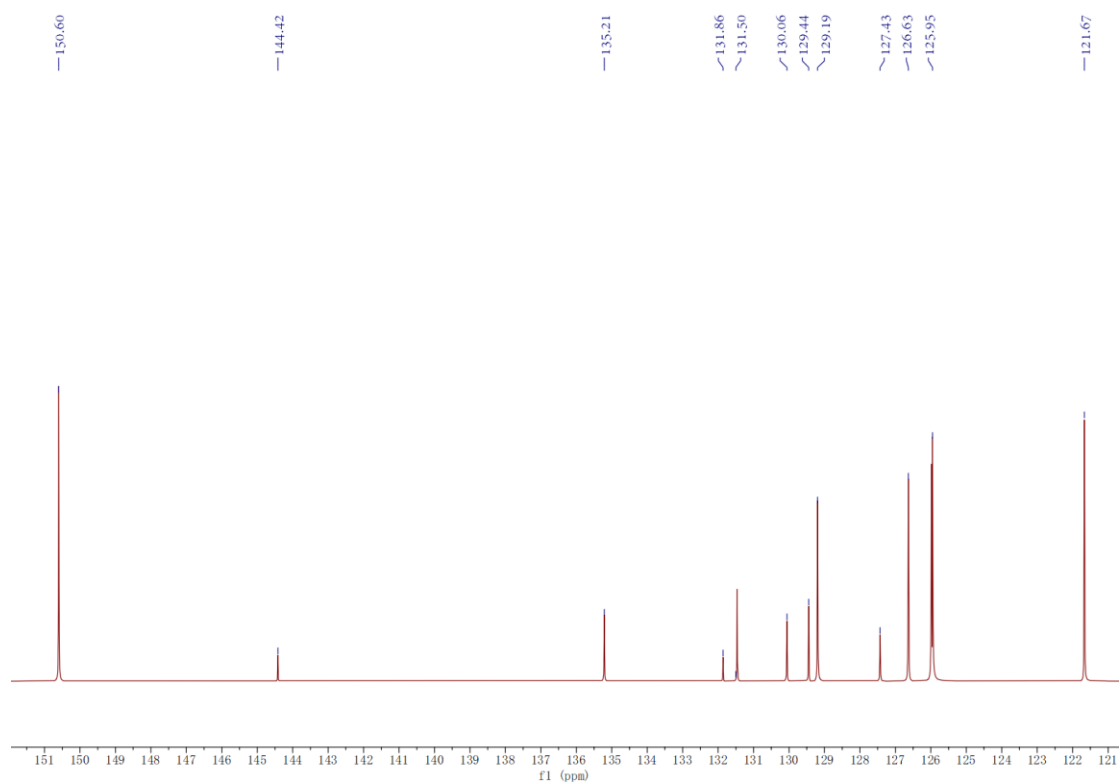

**Figure S3.** <sup>13</sup>C NMR spectrum of APE.

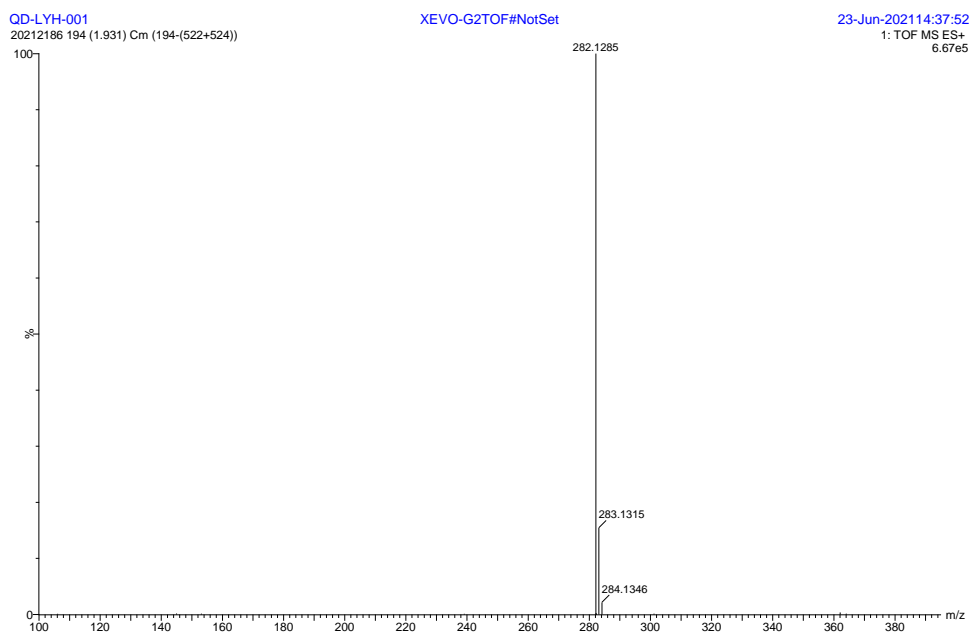

**Figure S4.** HR-MS(ESI) spectrum of APE.

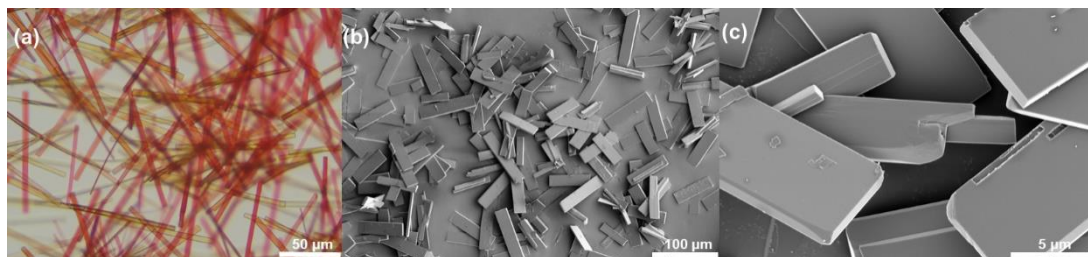

**Figure S5.** (a) Optical microscopy image of APE-TCNB solid cocrystals grown in SDS. (b) The SEM image of APE-TCNB solid cocrystals. (d) The SEM image of a fractured APE-TCNB solid cocrystal shows the interior structure.

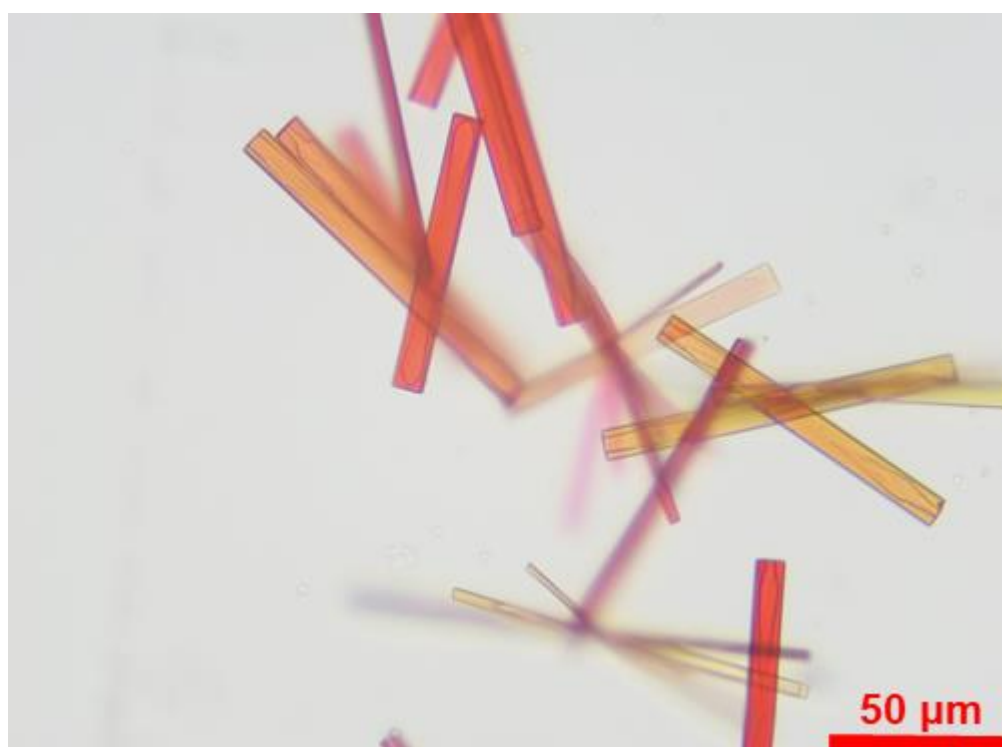

**Figure S6.** Optical microscopy image of APE-TCNB hollow cocrystals after 15 min intense sonication.

**Table S1.** Crystal data and structure refinement for mo\_d8v211043\_0m.

|                                   |                                                             |                                                       |
|-----------------------------------|-------------------------------------------------------------|-------------------------------------------------------|
| Identification code               | mo_d8v211043_0m                                             |                                                       |
| Empirical formula                 | $C_{31}H_{17}N_5$                                           |                                                       |
| Formula weight                    | 459.49                                                      |                                                       |
| Temperature                       | 293(2) K                                                    |                                                       |
| Wavelength                        | 0.71073 Å                                                   |                                                       |
| Crystal system                    | Triclinic                                                   |                                                       |
| Space group                       | P -1                                                        |                                                       |
| Unit cell dimensions              | a = 7.4656(12) Å<br>b = 9.1294(15) Å<br>c = 34.520(6) Å     | a = 90.960(4)°.<br>b = 92.040(4)°.<br>g = 91.918(4)°. |
| Volume                            | 2349.6(7) Å <sup>3</sup>                                    |                                                       |
| Z                                 | 4                                                           |                                                       |
| Density (calculated)              | 1.299 Mg/m <sup>3</sup>                                     |                                                       |
| Absorption coefficient            | 0.079 mm <sup>-1</sup>                                      |                                                       |
| F(000)                            | 952                                                         |                                                       |
| Crystal size                      | 0.190 x 0.120 x 0.060 mm <sup>3</sup>                       |                                                       |
| Theta range for data collection   | 1.771 to 24.999°.                                           |                                                       |
| Index ranges                      | -8<= <i>h</i> <=8, -10<= <i>k</i> <=10, -41<= <i>l</i> <=41 |                                                       |
| Reflections collected             | 40360                                                       |                                                       |
| Independent reflections           | 8237 [R(int) = 0.0803]                                      |                                                       |
| Completeness to theta = 25.242°   | 97.3 %                                                      |                                                       |
| Absorption correction             | Semi-empirical from equivalents                             |                                                       |
| Max. and min. transmission        | 0.7456 and 0.6183                                           |                                                       |
| Refinement method                 | Full-matrix least-squares on F <sup>2</sup>                 |                                                       |
| Data/restraints / parameters      | 8237 / 0 / 650                                              |                                                       |
| Goodness-of-fit on F <sup>2</sup> | 1.035                                                       |                                                       |
| Final R indices [I>2sigma(I)]     | R1 = 0.0763, wR2 = 0.1812                                   |                                                       |
| R indices (all data)              | R1 = 0.1539, wR2 = 0.2379                                   |                                                       |
| Extinction coefficient            | 0.014(2)                                                    |                                                       |
| Largest diff. peak and hole       | 0.536 and -0.357 e.Å <sup>-3</sup>                          |                                                       |
